# Supplementary material for: Structural Conservation and Functional Diversity of the Poxvirus Immune Evasion (PIE) Domain Superfamily
Source: MDPI journal article supplement (doi:10.3390/v7092848), 2015-08-28
Supplement: s1 [file s1]

# vCCI Family Alignment

|                    |   |     |     |     |     |     |     |     |   |
|--------------------|---|-----|-----|-----|-----|-----|-----|-----|---|
|                    |   | 1   | 10  | 20  | 30  | 40  | 50  |     |   |
| VARV_BR266_206     | M | KQ  | Q   | I   | V   | L   | A   | M   | G |
| VARV_CNG70_206     | M | C   | L   | A   | A   | A   | A   | M   | P |
| VARV_GAR_G3R       | M | C   | L   | A   | A   | A   | A   | M   | P |
| VARV_GU69_206      | M | C   | L   | A   | A   | A   | A   | M   | P |
| VARV_IND64_206     | M | C   | L   | A   | A   | A   | A   | M   | P |
| VARV_SLN68_206     | M | C   | L   | A   | A   | A   | A   | M   | P |
| MPXV-SL_001        | M | C   | L   | V   | A   | A   | A   | M   | P |
| MPXV-SL_177        | M | C   | L   | V   | A   | A   | A   | M   | P |
| MPXV_296_J1L       | M | C   | L   | V   | A   | A   | A   | M   | P |
| MPXV_296_J3R       | M | C   | L   | V   | A   | A   | A   | M   | P |
| CMV_N96_1          | M | C   | L   | V   | A   | A   | A   | M   | P |
| CMV_N96_211        | M | C   | L   | V   | A   | A   | A   | M   | P |
| HSPV002            | M | C   | L   | V   | A   | A   | A   | M   | P |
| HSPV206            | M | C   | L   | V   | A   | A   | A   | M   | P |
| CPXV_GRI_D1L       | M | C   | L   | V   | A   | A   | A   | M   | P |
| CPXV_GRI_15R       | M | C   | L   | V   | A   | A   | A   | M   | P |
| CPXV_BRI_003       | M | C   | L   | V   | A   | A   | A   | M   | P |
| CPXV_BRI_227       | M | C   | L   | V   | A   | A   | A   | M   | P |
| CPXV_GER91_001     | M | C   | L   | V   | A   | A   | A   | M   | P |
| CPXV_GER91_217     | M | C   | L   | V   | A   | A   | A   | M   | P |
| ECTV_MOS_001       | M | C   | L   | V   | A   | A   | A   | M   | P |
| ECTV_MOS_K2R       | M | C   | L   | V   | A   | A   | A   | M   | P |
| VACV_Lister_vCCI   | M | C   | L   | V   | A   | A   | A   | M   | P |
| MYXV_LAU_m001L     | M | C   | L   | V   | A   | A   | A   | M   | P |
| MYXV_LAU_M-T1      | M | C   | L   | V   | A   | A   | A   | M   | P |
| RPXV_Utrecht_35kDa | M | C   | L   | V   | A   | A   | A   | M   | P |
|                    |   | 60  | 70  | 80  | 90  | 100 |     |     |   |
| VARV_BR266_206     | S | V   | T   | E   | I   | T   | E   | S   | D |
| VARV_CNG70_206     | S | V   | T   | E   | I   | T   | E   | S   | D |
| VARV_GAR_G3R       | S | V   | T   | E   | I   | T   | E   | S   | D |
| VARV_GU69_206      | S | V   | T   | E   | I   | T   | E   | S   | D |
| VARV_IND64_206     | S | V   | T   | E   | I   | T   | E   | S   | D |
| VARV_SLN68_206     | S | V   | T   | E   | I   | T   | E   | S   | D |
| MPXV-SL_001        | S | V   | T   | E   | I   | T   | E   | S   | D |
| MPXV-SL_177        | S | V   | T   | E   | I   | T   | E   | S   | D |
| MPXV_296_J1L       | S | V   | T   | E   | I   | T   | E   | S   | D |
| MPXV_296_J3R       | S | V   | T   | E   | I   | T   | E   | S   | D |
| CMV_N96_1          | S | V   | T   | E   | I   | T   | E   | S   | D |
| CMV_N96_211        | S | V   | T   | E   | I   | T   | E   | S   | D |
| HSPV002            | S | V   | T   | E   | I   | T   | E   | S   | D |
| HSPV206            | S | V   | T   | E   | I   | T   | E   | S   | D |
| CPXV_GRI_D1L       | S | V   | T   | E   | I   | T   | E   | S   | D |
| CPXV_GRI_15R       | S | V   | T   | E   | I   | T   | E   | S   | D |
| CPXV_BRI_003       | S | V   | T   | E   | I   | T   | E   | S   | D |
| CPXV_BRI_227       | S | V   | T   | E   | I   | T   | E   | S   | D |
| CPXV_GER91_001     | S | V   | T   | E   | I   | T   | E   | S   | D |
| CPXV_GER91_217     | S | V   | T   | E   | I   | T   | E   | S   | D |
| ECTV_MOS_001       | S | V   | T   | E   | I   | T   | E   | S   | D |
| ECTV_MOS_K2R       | S | V   | T   | E   | I   | T   | E   | S   | D |
| VACV_Lister_vCCI   | S | V   | T   | E   | I   | T   | E   | S   | D |
| MYXV_LAU_m001L     | S | V   | T   | E   | I   | T   | E   | S   | D |
| MYXV_LAU_M-T1      | S | V   | T   | E   | I   | T   | E   | S   | D |
| RPXV_Utrecht_35kDa | S | V   | T   | E   | I   | T   | E   | S   | D |
|                    |   | 110 | 120 | 130 | 140 | 150 | 160 | 170 |   |
| VARV_BR266_206     | Q | I   | K   | S   | I   | S   | E   | S   | A |
| VARV_CNG70_206     | Q | I   | K   | S   | I   | S   | E   | S   | A |
| VARV_GAR_G3R       | Q | I   | K   | S   | I   | S   | E   | S   | A |
| VARV_GU69_206      | Q | I   | K   | S   | I   | S   | E   | S   | A |
| VARV_IND64_206     | Q | I   | K   | S   | I   | S   | E   | S   | A |
| VARV_SLN68_206     | Q | I   | K   | S   | I   | S   | E   | S   | A |
| MPXV-SL_001        | K | I   | S   | S   | I   | S   | E   | S   | S |
| MPXV-SL_177        | K | I   | S   | S   | I   | S   | E   | S   | S |
| MPXV_296_J1L       | K | I   | S   | S   | I   | S   | E   | S   | S |
| MPXV_296_J3R       | K | I   | S   | S   | I   | S   | E   | S   | S |
| CMV_N96_1          | Q | I   | K   | S   | I   | S   | E   | S   | A |
| CMV_N96_211        | Q | I   | K   | S   | I   | S   | E   | S   | A |
| HSPV002            | K | I   | L   | S   | I   | S   | E   | S   | S |
| HSPV206            | K | I   | L   | S   | I   | S   | E   | S   | S |
| CPXV_GRI_D1L       | Q | I   | K   | S   | I   | S   | E   | S   | A |
| CPXV_GRI_15R       | Q | I   | K   | S   | I   | S   | E   | S   | A |
| CPXV_BRI_003       | K | I   | S   | I   | S   | E   | S   | S   | I |
| CPXV_BRI_227       | K | I   | S   | I   | S   | E   | S   | S   | I |
| CPXV_GER91_001     | K | I   | S   | I   | S   | E   | S   | S   | I |
| CPXV_GER91_217     | K | I   | S   | I   | S   | E   | S   | S   | I |
| ECTV_MOS_001       | Q | I   | K   | S   | I   | S   | E   | S   | A |
| ECTV_MOS_K2R       | Q | I   | K   | S   | I   | S   | E   | S   | A |
| VACV_Lister_vCCI   | Q | I   | K   | S   | I   | S   | E   | S   | A |
| MYXV_LAU_m001L     | T | Y   | K   | A   | I   | S   | E   | H   | V |
| MYXV_LAU_M-T1      | T | Y   | K   | A   | I   | S   | E   | H   | V |
| RPXV_Utrecht_35kDa | Q | I   | K   | S   | I   | S   | E   | S   | A |
|                    |   | 180 | 190 | 200 | 210 | 220 | 230 |     |   |
| VARV_BR266_206     | V | L   | S   | N   | I   | S   | H   | K   | K |
| VARV_CNG70_206     | V | L   | S   | N   | I   | S   | H   | K   | K |
| VARV_GAR_G3R       | V | L   | S   | N   | I   | S   | H   | K   | K |
| VARV_GU69_206      | V | L   | S   | N   | I   | S   | H   | K   | K |
| VARV_IND64_206     | V | L   | S   | N   | I   | S   | H   | K   | K |
| VARV_SLN68_206     | V | L   | S   | N   | I   | S   | H   | K   | K |
| MPXV-SL_001        | V | L   | S   | N   | I   | S   | H   | K   | K |
| MPXV-SL_177        | V | L   | S   | N   | I   | S   | H   | K   | K |
| MPXV_296_J1L       | V | L   | S   | N   | I   | S   | H   | K   | K |
| MPXV_296_J3R       | V | L   | S   | N   | I   | S   | H   | K   | K |
| CMV_N96_1          | V | L   | S   | N   | I   | S   | H   | K   | K |
| CMV_N96_211        | V | L   | S   | N   | I   | S   | H   | K   | K |
| HSPV002            | V | L   | S   | N   | I   | S   | H   | K   | K |
| HSPV206            | V | L   | S   | N   | I   | S   | H   | K   | K |
| CPXV_GRI_D1L       | V | L   | S   | N   | I   | S   | H   | K   | K |
| CPXV_GRI_15R       | V | L   | S   | N   | I   | S   | H   | K   | K |
| CPXV_BRI_003       | V | L   | S   | N   | I   | S   | H   | K   | K |
| CPXV_BRI_227       | V | L   | S   | N   | I   | S   | H   | K   | K |
| CPXV_GER91_001     | V | L   | S   | N   | I   | S   | H   | K   | K |
| CPXV_GER91_217     | V | L   | S   | N   | I   | S   | H   | K   | K |
| ECTV_MOS_001       | V | L   | S   | N   | I   | S   | H   | K   | K |
| ECTV_MOS_K2R       | V | L   | S   | N   | I   | S   | H   | K   | K |
| VACV_Lister_vCCI   | V | L   | S   | N   | I   | S   | H   | K   | K |
| MYXV_LAU_m001L     | A | L   | V   | P   | R   | I   | T   | O   | A |
| MYXV_LAU_M-T1      | A | L   | V   | P   | R   | I   | T   | O   | A |
| RPXV_Utrecht_35kDa | V | L   | S   | N   | I   | S   | H   | K   | K |
|                    |   | 240 | 250 |     |     |     |     |     |   |
| VARV_BR266_206     | D | T   | S   | L   | I   | D   | S   | T   | K |
| VARV_CNG70_206     | D | T   | S   | L   | I   | D   | S   | T   | K |
| VARV_GAR_G3R       | D | T   | S   | L   | I   | D   | S   | T   | K |
| VARV_GU69_206      | D | T   | S   | L   | I   | D   | S   | T   | K |
| VARV_IND64_206     | D | T   | S   | L   | I   | D   | S   | T   | K |
| VARV_SLN68_206     | D | T   | S   | L   | I   | D   | S   | T   | K |
| MPXV-SL_001        | D | T   | S   | L   | I   | D   | S   | T   | K |
| MPXV-SL_177        | D | T   | S   | L   | I   | D   | S   | T   | K |
| MPXV_296_J1L       | D | T   | S   | L   | I   | D   | S   | T   | K |
| MPXV_296_J3R       | D | T   | S   | L   | I   | D   | S   | T   | K |
| CMV_N96_1          | D | T   | S   | L   | I   | D   | S   | T   | K |
| CMV_N96_211        | D | T   | S   | L   | I   | D   | S   | T   | K |
| HSPV002            | N | T   | S   | L   | I   | D   | S   | T   | K |
| HSPV206            | N | T   | S   | L   | I   | D   | S   | T   | K |
| CPXV_GRI_D1L       | D | T   | S   | L   | I   | D   | S   | T   | K |
| CPXV_GRI_15R       | D | T   | S   | L   | I   | D   | S   | T   | K |
| CPXV_BRI_003       | D | T   | S   | L   | I   | N   | S   | A   | K |
| CPXV_BRI_227       | D | T   | S   | L   | I   | N   | S   | A   | K |
| CPXV_GER91_001     | D | T   | S   | L   | I   | N   | S   | A   | K |
| CPXV_GER91_217     | D | T   | S   | L   | I   | N   | S   | A   | K |
| ECTV_MOS_001       | D | T   | S   | L   | I   | D   | S   | T   | K |
| ECTV_MOS_K2R       | D | T   | S   | L   | I   | D   | S   | T   | K |
| VACV_Lister_vCCI   | D | T   | S   | L   | I   | D   | S   | T   | K |
| MYXV_LAU_m001L     | D | I   | L   | V   | L   | R   | T   | P   | T |
| MYXV_LAU_M-T1      | D | I   | L   | V   | L   | R   | T   | P   | T |
| RPXV_Utrecht_35kDa | D | T   | S   | L   | I   | D   | S   | T   | K |

**Figure S1.** Sequence alignment of the vCCI family members. Cysteine residues are boxed in yellow Predicted N-linked glycosylation sites are boxed in blue.
