# Supplementary material for: Structural Conservation and Functional Diversity of the Poxvirus Immune Evasion (PIE) Domain Superfamily
Source: MDPI journal article supplement (doi:10.3390/v7092848), 2015-08-28
Supplement: s1 [file s1]

# A41 Family Alignment

|                 |   |    |    |    |    |    |    |    |   |   |   |   |   |   |   |   |   |   |   |     |     |     |     |   |   |   |   |   |   |   |   |   |   |   |   |   |   |   |   |   |   |   |   |   |   |   |   |   |   |   |   |   |   |   |   |   |   |   |    |    |    |    |   |    |
|-----------------|---|----|----|----|----|----|----|----|---|---|---|---|---|---|---|---|---|---|---|-----|-----|-----|-----|---|---|---|---|---|---|---|---|---|---|---|---|---|---|---|---|---|---|---|---|---|---|---|---|---|---|---|---|---|---|---|---|---|---|---|----|----|----|----|---|----|
|                 | 1 | 10 | 20 | 30 | 40 | 50 | 60 | 80 |   |   |   |   |   |   |   |   |   |   |   |     |     |     |     |   |   |   |   |   |   |   |   |   |   |   |   |   |   |   |   |   |   |   |   |   |   |   |   |   |   |   |   |   |   |   |   |   |   |   |    |    |    |    |   |    |
| VARV_BR266_157  | M | S  | L  | V  | F  | V  | I  | L  | M | I | P | F | S | F | Q | T | V | Y | D | ... | D   | K   | S   | V | C | D | S | D | N | K | E | Y | M | G | I | E | V | Y | V | E | A | T | L | D | E | P | L | R | Q | T | T | E | S | E | I | H | K | Y | 60 |    |    |    |   |    |
| VARV_CNG70_157  | M | S  | L  | V  | F  | V  | I  | L  | M | I | P | F | S | F | Q | T | V | Y | D | ... | D   | K   | S   | V | C | D | S | D | N | K | E | Y | M | G | I | E | V | Y | V | E | A | T | L | D | E | P | L | R | Q | T | T | E | S | E | I | H | K | Y | 60 |    |    |    |   |    |
| VARV_GUI69_157  | M | S  | L  | V  | F  | V  | I  | L  | M | I | P | F | S | F | Q | T | V | Y | D | ... | D   | K   | S   | V | C | D | S | D | N | K | E | Y | M | G | I | E | V | Y | V | E | A | T | L | D | E | P | L | R | Q | T | T | E | S | E | I | H | K | Y | 60 |    |    |    |   |    |
| VARV_GAR_A49L   | M | S  | L  | V  | F  | V  | I  | L  | M | I | P | F | S | F | Q | T | V | Y | D | ... | D   | K   | S   | V | C | D | S | D | N | K | E | Y | M | G | I | E | V | Y | V | E | A | T | L | D | E | P | L | R | Q | T | T | E | S | E | I | H | K | Y | 60 |    |    |    |   |    |
| VARV_IND61_158  | M | S  | L  | V  | F  | V  | I  | L  | M | I | P | F | S | F | Q | T | V | Y | D | ... | D   | K   | S   | V | C | D | S | D | N | K | E | Y | M | G | I | E | V | Y | V | E | A | T | L | D | E | P | L | R | Q | T | T | E | S | E | I | H | K | Y | 60 |    |    |    |   |    |
| VARV_SLN66_157  | M | S  | L  | V  | F  | V  | I  | L  | M | I | P | F | S | F | Q | T | V | Y | D | ... | D   | K   | S   | V | C | D | S | D | N | K | E | Y | M | G | I | E | V | Y | V | E | A | T | L | D | E | P | L | R | Q | T | T | E | S | E | I | H | K | Y | 60 |    |    |    |   |    |
| MPXV_SL_145     | M | Y  | L  | L  | F  | I  | I  | L  | M | Y | L | P | F | S | F | Q | T | S | E | P   | A   | Y   | ... | D | K | S | V | C | D | S | D | N | K | E | Y | M | G | I | E | V | Y | V | E | A | T | L | D | E | P | L | R | Q | T | T | E | S | E | I | H  | K  | Y  | 62 |   |    |
| MPXV_Z96_A41L   | M | Y  | I  | L  | F  | I  | I  | L  | M | Y | L | P | F | S | F | Q | T | S | E | P   | A   | Y   | ... | D | K | S | V | C | D | S | D | N | K | E | Y | M | G | I | E | V | Y | V | E | A | T | L | D | E | P | L | R | Q | T | T | E | S | E | I | H  | K  | Y  | 62 |   |    |
| CMLV_M96_160    | M | Y  | S  | L  | V  | F  | V  | I  | L | M | I | P | F | S | F | Q | T | V | Y | D   | ... | D   | K   | S | V | C | D | S | D | N | K | E | Y | M | G | I | E | V | Y | V | E | A | T | L | D | E | P | L | R | Q | T | T | E | S | E | I | H | K | Y  | 60 |    |    |   |    |
| TATV_DAH66_A43L | M | Y  | S  | L  | V  | F  | V  | I  | L | M | I | P | F | S | F | Q | T | V | Y | D   | ... | D   | K   | S | V | C | D | S | D | N | K | E | Y | M | G | I | E | V | Y | V | E | A | T | L | D | E | P | L | R | Q | T | T | E | S | E | I | H | K | Y  | 60 |    |    |   |    |
| HSPV_163        | M | Y  | S  | L  | V  | F  | V  | I  | L | M | I | P | F | S | F | Q | T | V | Y | D   | ... | D   | K   | S | V | C | D | S | D | N | K | E | Y | M | G | I | E | V | Y | V | E | A | T | L | D | E | P | L | R | Q | T | T | E | S | E | I | H | K | Y  | 60 |    |    |   |    |
| CPXV_GRI_A43L   | M | Y  | S  | L  | L  | F  | I  | I  | L | M | I | P | F | S | F | Q | T | V | Y | D   | ... | D   | K   | S | V | C | D | S | D | N | K | E | Y | M | G | I | E | V | Y | V | E | A | T | L | D | E | H | L | R | Q | T | T | E | S | E | I | H | K | Y  | 60 |    |    |   |    |
| CPXV_BRI_178    | M | Y  | S  | L  | F  | I  | I  | L  | M | I | P | F | S | F | Q | T | S | E | P | A   | Y   | ... | D   | K | S | V | C | D | S | D | N | K | E | Y | M | G | I | E | V | Y | V | E | A | T | L | D | E | P | L | R | Q | T | T | E | S | E | I | H | K  | Y  | 61 |    |   |    |
| CPXV_GER91_166  | M | Y  | S  | L  | V  | F  | V  | I  | L | M | I | P | F | S | F | Q | T | T | E | T   | A   | Y   | ... | D | K | S | V | C | D | S | D | N | K | E | Y | M | G | I | E | V | Y | V | E | A | T | L | D | E | P | L | R | Q | T | T | E | S | E | I | H  | K  | Y  | 62 |   |    |
| ECTV_MOS_140    | M | Y  | L  | L  | L  | F  | T  | I  | L | M | I | P | F | S | V | R | T | T | S | E   | T   | V   | Y   | N | G | D | T | S | I | C | N | S | D | N | K | E | Y | I | G | I | E | V | Y | V | E | A | T | L | D | E | P | L | R | Q | T | T | E | S | E  | I  | H  | K  | Y | 65 |
| VACV_WR_A41     | M | Y  | S  | L  | V  | F  | V  | I  | L | M | I | P | F | S | F | Q | T | V | Y | D   | ... | D   | K   | S | V | C | D | S | D | N | K | E | Y | M | G | I | E | V | Y | V | E | A | T | L | D | E | P | L | R | Q | T | T | E | S | E | I | H | K | Y  | 60 |    |    |   |    |

  

|                 |    |    |    |     |     |     |   |   |   |   |   |   |   |   |   |   |   |   |   |   |   |   |   |   |   |   |   |   |   |   |   |   |   |   |   |   |   |   |   |   |   |   |   |   |   |   |   |   |   |   |   |   |   |   |   |   |   |   |   |   |   |   |   |     |     |
|-----------------|----|----|----|-----|-----|-----|---|---|---|---|---|---|---|---|---|---|---|---|---|---|---|---|---|---|---|---|---|---|---|---|---|---|---|---|---|---|---|---|---|---|---|---|---|---|---|---|---|---|---|---|---|---|---|---|---|---|---|---|---|---|---|---|---|-----|-----|
|                 | 70 | 80 | 90 | 100 | 110 | 120 |   |   |   |   |   |   |   |   |   |   |   |   |   |   |   |   |   |   |   |   |   |   |   |   |   |   |   |   |   |   |   |   |   |   |   |   |   |   |   |   |   |   |   |   |   |   |   |   |   |   |   |   |   |   |   |   |   |     |     |
| VARV_BR266_157  | G  | A  | S  | V   | S   | N   | G | G | L | I | S | V | D | L | L | N | C | F | L | N | F | H | T | V | G | V | Y | T | N | R | D | T | V | Y | A | K | F | A | S | L | D | P | W | T | M | E | P | I | N | S | M | T | Y | D | D | L | V | K | L | T | E | E | C | I   | 125 |
| VARV_CNG70_157  | G  | A  | S  | V   | S   | N   | G | G | L | I | S | V | D | L | L | N | C | F | L | N | F | H | T | V | G | V | Y | T | N | R | D | T | V | Y | A | K | F | A | S | L | D | P | W | T | M | E | P | I | N | S | M | T | Y | D | D | L | V | K | L | T | E | E | C | I   | 125 |
| VARV_GUI69_157  | G  | A  | S  | V   | S   | N   | G | G | L | I | S | V | D | L | L | N | C | F | L | N | F | H | T | V | G | V | Y | T | N | R | D | T | V | Y | A | K | F | A | S | L | D | P | W | T | M | E | P | I | N | S | M | T | Y | D | D | L | V | K | L | T | E | E | C | I   | 125 |
| VARV_GAR_A49L   | G  | A  | S  | V   | S   | N   | G | G | L | I | S | V | D | L | L | N | C | F | L | N | F | H | T | V | G | V | Y | T | N | R | D | T | V | Y | A | K | F | A | S | L | D | P | W | T | M | E | P | I | N | S | M | T | Y | D | D | L | V | K | L | T | E | E | C | I   | 125 |
| VARV_SLN66_157  | G  | A  | S  | V   | S   | N   | G | G | L | I | S | V | D | L | L | N | C | F | L | N | F | H | T | V | G | V | Y | T | N | R | D | T | V | Y | A | K | F | A | S | L | D | P | W | T | M | E | P | I | N | S | M | T | Y | D | D | L | V | K | L | T | E | E | C | I   | 125 |
| MPXV_SL_145     | G  | A  | S  | V   | S   | N   | G | G | L | I | S | V | D | L | L | N | C | F | L | N | F | H | T | V | G | V | Y | T | N | R | D | T | V | Y | A | K | F | A | S | L | D | P | W | T | T | E | P | M | N | S | M | T | H | D | L | V | K | L | T | E | E | C | I | 125 |     |
| MPXV_Z96_A41L   | G  | A  | S  | V   | S   | N   | G | G | L | I | S | V | D | L | L | N | C | F | L | N | F | H | T | V | G | V | Y | T | N | R | D | T | V | Y | A | K | F | A | S | L | D | P | W | T | T | E | P | M | N | S | M | T | H | D | L | V | K | L | T | E | E | C | I | 127 |     |
| CMLV_M96_160    | G  | A  | S  | V   | S   | N   | G | G | L | I | S | V | D | L | L | N | C | F | L | N | F | H | T | V | G | V | Y | T | N | R | D | T | V | Y | A | K | F | A | S | L | D | P | W | T | M | E | P | I | N | S | M | T | Y | D | D | L | V | K | L | T | E | E | C | I   | 127 |
| TATV_DAH66_A43L | G  | A  | S  | V   | S   | N   | G | G | L | I | S | V | D | L | L | N | C | F | L | N | F | H | T | V | G | V | Y | T | N | R | D | T | V | Y | A | K | F | A | S | L | D | P | W | T | M | E | P | I | N | S | M | T | H | D | L | V | K | L | T | E | E | C | I | 125 |     |
| HSPV_163        | G  | A  | S  | V   | S   | N   | G | G | L | I | S | V | D | L | L | N | C | F | L | N | F | H | T | V | G | V | Y | T | N | R | D | T | V | Y | A | K | F | A | S | L | D | P | W | T | T | E | P | I | N | S | M | T | H | D | L | V | K | L | T | E | E | C | I | 125 |     |
| CPXV_GRI_A43L   | G  | A  | S  | V   | S   | N   | G | G | L | I | S | V | D | L | L | N | C | F | L | N | F | H | T | V | G | V | Y | T | N | R | D | T | V | Y | A | K | F | A | S | L | D | P | W | T | T | E | P | I | N | S | M | T | H | D | L | V | K | L | T | E | E | C | I | 125 |     |
| CPXV_BRI_178    | G  | A  | S  | V   | S   | N   | G | G | L | I | S | V | D | L | L | N | C | F | L | N | F | H | T | V | G | V | Y | T | N | R | D | T | V | Y | A | K | F | A | S | L | D | P | W | T | T | E | P | I | N | S | M | T | H | D | L | V | K | L | T | E | E | C | I | 125 |     |
| CPXV_GER91_166  | G  | A  | S  | V   | S   | N   | G | G | L | I | S | V | D | L | L | N | C | F | L | N | F | H | T | V | G | V | Y | T | N | R | D | T | V | Y | A | K | F | A | S | L | D | P | W | T | T | E | P | I | N | S | M | T | H | D | L | V | K | L | T | E | E | C | I | 125 |     |
| ECTV_MOS_140    | G  | A  | S  | V   | S   | N   | G | G | L | I | S | V | D | L | L | N | C | F | L | N | F | H | T | V | G | V | Y | T | N | R | D | T | V | Y | A | K | F | A | S | L | D | P | W | T | T | E | P | I | N | S | M | T | H | D | L | V | K | L | T | E | E | C | I | 127 |     |
| VACV_WR_A41     | G  | A  | S  | V   | S   | N   | G | G | L | I | S | V | D | L | L | N | C | F | L | N | F | H | T | V | G | V | Y | T | N | R | D | T | V | Y | A | K | F | A | S | L | D | P | W | T | T | E | P | I | N | S | M | T | H | D | L | V | K | L | T | E | E | C | I | 125 |     |

  

|                |     |     |     |     |     |     |   |   |   |   |   |   |   |   |   |   |   |   |   |   |   |   |   |   |   |   |   |   |   |   |   |   |   |   |   |   |   |   |   |   |   |   |   |   |   |   |   |   |   |   |   |   |   |   |   |   |   |   |   |   |   |   |   |   |     |
|----------------|-----|-----|-----|-----|-----|-----|---|---|---|---|---|---|---|---|---|---|---|---|---|---|---|---|---|---|---|---|---|---|---|---|---|---|---|---|---|---|---|---|---|---|---|---|---|---|---|---|---|---|---|---|---|---|---|---|---|---|---|---|---|---|---|---|---|---|-----|
|                | 130 | 140 | 150 | 160 | 170 | 180 |   |   |   |   |   |   |   |   |   |   |   |   |   |   |   |   |   |   |   |   |   |   |   |   |   |   |   |   |   |   |   |   |   |   |   |   |   |   |   |   |   |   |   |   |   |   |   |   |   |   |   |   |   |   |   |   |   |   |     |
| VARV_BR266_157 | V   | D   | I   | Y   | L   | K   | G | E | V | D | K | T | K | D | F | I | K | T | N | G | N | R | L | K | P | R | D | F | K | T | V | P | P | N | V | G | S | I | I | E | L | Q | S | D | Y | C | V | N | D | V | T | A | Y | V | K | I | Y | N | E | C | G | N | I | K | 189 |
| VARV_CNG70_157 | V   | D   | I   | Y   | L   | K   | G | E | V | D | K | T | K | D | F | I | K | T | N | G | N | R | L | K | P | R | D | F | K | T | V | P | P | N | V | G | S | I | I | E | L | Q | S | D | Y | C | V | N | D | V | T | A | Y | V | K | I | Y | N | E | C | G | N | I | K | 189 |
| VARV_GUI69_157 | V   | D   | I   | Y   | L   | K   | G | E | V | D | K | T | K | D | F | I | K | T | N | G | N | R | L | K | P | R | D | F | K | T | V | P | P | N | V | G | S | I | I | E | L | Q | S | D | Y | C | V | N | D | V | T | A | Y | V | K | I | Y | N | E | C | G | N | I | K | 189 |
| VARV_GAR_A49L  | V   | D   | I   | Y   | L   | K   | G | E | V | D | K | T | K | D | F | I | K | T | N | G | N | R | L | K | P | R | D | F | K | T | V | P | P | N | V | G | S | I | I | E | L | Q | S | D | Y | C | V | N | D | V | T | A | Y | V | K | I | Y | N | E | C | G | N | I | K | 189 |
| VARV_IND61_158 | V   | D   | I   | Y   | L   | K   | G | E | V | D | K | T | K | D | F | I | K | T | N | G | N | R | L | K | P | R | D | F | K | T |   |   |   |   |   |   |   |   |   |   |   |   |   |   |   |   |   |   |   |   |   |   |   |   |   |   |   |   |   |   |   |   |   |   |     |
