# Supplementary material for: Structural Conservation and Functional Diversity of the Poxvirus Immune Evasion (PIE) Domain Superfamily
Source: MDPI journal article supplement (doi:10.3390/v7092848), 2015-08-28
Supplement: s1 [file s1]

## Amino Acid Relatedness of the PIE Domain Sequences

Although the PIE proteins are similar in structure, they share very little primary sequence similarity. Here, a total of 156 PIE protein sequences were grouped into 20 families as shown in Table 2 of the text. These families contained many duplicate sequences, due in part because of orfs located in ITR regions of the different poxvirus, but also because some of the virus strains are closely related. The signal peptides were removed (as predicted by SignalP4.1 server, <http://www.cbs.dtu.dk/services/SignalP/>). Each family was aligned using the MUSCLE server (<http://www.ebi.ac.uk/Tools/msa/muscle/>). Next poorly aligned positions and divergent regions were excised with Gblocks (<http://molevol.cmima.csic.es/castresana/Gblocks.html>). The trimmed sequences were aligned as a pool using MUSCLE and the resulting alignment passed for analysis to the program MrBayes, available as part of the Phylemon 2.0 package (<http://phylemon.bioinfo.cipf.es/>). The output from MrBayes is given below.

MrBayes v3.2.0

(Bayesian Analysis of Phylogeny)

Distributed under the GNU General Public License

Type "help" or "help command>" for information  
on the commands that are available.

Type "about" for authorship and general  
information about the program.

Executing file "/infile\_converted.phy"

UNIX line termination

Longest line length = 70

Parsing file

Expecting NEXUS formatted file

Reading data block

Allocated taxon set

Allocated matrix

Defining new matrix with 156 taxa and 350 characters

Data is Protein

Data matrix is interleaved

Gaps coded as -

Taxon 1 -> 139\_vCCI\_VARV\_GAR\_G3R  
Taxon 2 -> 140\_vCCI\_VARV\_CNG70\_206  
Taxon 3 -> 129\_vCCI\_VARV\_BRZ66\_206  
Taxon 4 -> 130\_vCCI\_VARV\_SLN68\_206  
Taxon 5 -> 155\_vCCI\_VARV\_GUI69\_206  
Taxon 6 -> 156\_vCCI\_VARV\_IND64\_206  
Taxon 7 -> 143\_vCCI\_CMLV\_M96\_211  
Taxon 8 -> 144\_vCCI\_CMLV\_M96\_  
Taxon 9 -> 133\_vCCI\_CPXV\_GRI\_D1L  
Taxon 10 -> 141\_vCCI\_CPXV\_GRI\_I5R  
Taxon 11 -> 134\_vCCI\_VACV\_WR\_B29R  
Taxon 12 -> 135\_vCCI\_VACV\_WR\_C23L  
Taxon 13 -> 142\_vCCI\_RPXV\_Utrecht\_35kDa  
Taxon 14 -> 136\_vCCI\_VACV\_Lister\_vCCI  
Taxon 15 -> 131\_vCCI\_ECTV\_MOS\_K2R  
Taxon 16 -> 132\_vCCI\_ECTV\_MOS\_001  
Taxon 17 -> 149\_vCCI\_CPXV\_BRI\_003  
Taxon 18 -> 152\_vCCI\_CPXV\_BRI\_227  
Taxon 19 -> 153\_vCCI\_CPXV\_GER91\_001  
Taxon 20 -> 154\_vCCI\_CPXV\_GER91\_217  
Taxon 21 -> 137\_vCCI\_HSPV002  
Taxon 22 -> 138\_vCCI\_HSPV206  
Taxon 23 -> 150\_vCCI\_MPXV\_Z96\_J3R  
Taxon 24 -> 151\_vCCI\_MPXVSL\_001  
Taxon 25 -> 147\_vCCI\_MPXVSL\_177  
Taxon 26 -> 148\_vCCI\_MPXV\_Z96\_J1L

Taxon 27 -> 145\_vCCI\_MYXV\_LAU\_MT1  
Taxon 28 -> 146\_vCCI\_MYXV\_LAU\_m001L  
Taxon 29 -> 3\_A41like\_COTV011  
Taxon 30 -> 4\_A41like\_COTV175  
Taxon 31 -> 5\_A41\_MPXV\_SL\_145  
Taxon 32 -> 6\_A41\_MPXV\_Z96\_A41L  
Taxon 33 -> 17\_A41\_CPXV\_BRI\_178  
Taxon 34 -> 18\_A41\_CPXV\_GER91\_166  
Taxon 35 -> 7\_A41\_VARV\_GAR\_A49L  
Taxon 36 -> 10\_A41\_VARV\_BRZ66\_157  
Taxon 37 -> 11\_A41\_VARV\_IND64\_158  
Taxon 38 -> 12\_A41\_VARV\_SLN68\_157  
Taxon 39 -> 9\_A41\_VARV\_CNG70\_157  
Taxon 40 -> 8\_A41\_VARV\_GUI69\_157  
Taxon 41 -> 13\_A41\_TATV\_DAH68\_A43L  
Taxon 42 -> 16\_A41\_CPXV\_GRI\_A43L  
Taxon 43 -> 15\_A41\_HSPV\_163  
Taxon 44 -> 20\_A41\_VACV\_WR\_A41  
Taxon 45 -> 14\_A41\_CMLV\_M96\_160  
Taxon 46 -> 19\_A41\_ECTV\_MOS\_140  
Taxon 47 -> 80\_GIF\_ORFVgORF117  
Taxon 48 -> 82\_GIF\_PCPV\_gp121  
Taxon 49 -> 21\_BPSVgORF117  
Taxon 50 -> 81\_GIF\_SB87\_117  
Taxon 51 -> 75\_CBP\_ORFVgORF112  
Taxon 52 -> 79\_CPB\_PCPV\_gp116  
Taxon 53 -> 76\_CBP\_BPSVgORF112  
Taxon 54 -> 77\_CPB\_SB87\_gp112  
Taxon 55 -> 78\_CPB\_SB87\_gp111  
Taxon 56 -> 109\_T4like\_MPXV\_Z96\_B10R  
Taxon 57 -> 112\_T4like\_CPXV\_GRI\_B8R  
Taxon 58 -> 110\_T4like\_CMLV\_M96\_MT4like  
Taxon 59 -> 111\_T4like\_TATV\_DAH68\_195  
Taxon 60 -> 113\_T4like\_CPXV\_BRI\_203  
Taxon 61 -> 114\_T4like\_CPXV\_GER91\_191  
Taxon 62 -> 115\_T4like\_YKV002c  
Taxon 63 -> 116\_T4like\_YKV185  
Taxon 64 -> 117\_T4\_MYXV\_LAU\_MT4  
Taxon 65 -> 118\_T4\_MYXV\_LAU\_m004L  
Taxon 66 -> 119\_T4\_DPXV\_W83\_004  
Taxon 67 -> 120\_T4\_DPXV\_W83\_166  
Taxon 68 -> 121\_T4\_LSDV\_2490\_003  
Taxon 69 -> 122\_T4\_LSDV\_2490\_154  
Taxon 70 -> 123\_T4\_SPPV\_A\_002  
Taxon 71 -> 124\_T4\_SPPV\_A\_129  
Taxon 72 -> 125\_T4\_GTPV\_G20\_002  
Taxon 73 -> 126\_T4\_GTPV\_G20\_130  
Taxon 74 -> 127\_T4\_GTP\_PEL\_002  
Taxon 75 -> 128\_T4\_GTP\_PEL\_146  
Taxon 76 -> 24\_C8\_VACV\_WR\_C8L  
Taxon 77 -> 25\_C8\_HSPV9\_023  
Taxon 78 -> 22\_C8\_CPXV\_BRI\_028  
Taxon 79 -> 23\_C8\_CMLV\_M96\_18  
Taxon 80 -> 26\_C8\_CPXV\_GER91\_026  
Taxon 81 -> 27\_C8\_CPXV\_GRI\_C12L  
Taxon 82 -> 98\_SCP3\_MPXVSL161  
Taxon 83 -> 99\_SCP3\_MPXV\_Z96\_B8R  
Taxon 84 -> 101\_SCP3\_HSPV184  
Taxon 85 -> 106\_SCP3\_VACV\_WR\_B7R  
Taxon 86 -> 102\_SCP3\_CPXV\_GRI\_B6R  
Taxon 87 -> 105\_SCP3\_ECTV\_MOS\_C3R  
Taxon 88 -> 100\_SCP3\_TATV\_DAH68\_190

Taxon 89 -> 104\_SCP3\_CPXV\_GER91\_188  
Taxon 90 -> 103\_SCP3\_CPXV\_BRI\_201  
Taxon 91 -> 84\_SCP1\_MPXV\_SL\_170  
Taxon 92 -> 85\_SCP1\_MPXV\_Z96\_B20R  
Taxon 93 -> 90\_SCP1\_CPXV\_GRI\_B21R  
Taxon 94 -> 87\_SCP1\_VACV\_WR\_C13L  
Taxon 95 -> 86\_SCP1\_CPXV\_GER91\_204  
Taxon 96 -> 91\_SCP1\_HSPV199  
Taxon 97 -> 88\_SCP1\_CPXV\_BRI\_218  
Taxon 98 -> 89\_SCP1\_TATV\_DAH68\_218  
Taxon 99 -> 92\_SCP1\_CMLV\_M96\_206  
Taxon 100 -> 107\_SCPlike\_COTV179  
Taxon 101 -> 108\_SCPlike\_COTV007  
Taxon 102 -> 30\_CrmB\_MPXV\_SL\_176  
Taxon 103 -> 31\_CrmB\_MPXV\_SL\_002  
Taxon 104 -> 32\_CrmB\_MPXV\_Z96\_J2R  
Taxon 105 -> 33\_CrmB\_MPXV\_Z96\_J2L  
Taxon 106 -> 40\_CrmB\_CMLV\_M96\_CrmB  
Taxon 107 -> 41\_CrmB\_CMLV\_M96a\_CrmB  
Taxon 108 -> 44\_CrmB\_CPXV\_GRI\_D2L  
Taxon 109 -> 45\_CrmB\_CPXV\_GRI\_I4R  
Taxon 110 -> 42\_CrmB\_HSPV\_205  
Taxon 111 -> 43\_CrmB\_HSPV\_003  
Taxon 112 -> 48\_CrmB\_CPXV\_GER91\_216  
Taxon 113 -> 49\_CrmB\_CPXV\_GER91\_002  
Taxon 114 -> 36\_CrmB\_VARV\_GUI69\_205  
Taxon 115 -> 38\_CrmB\_VARV\_SLN68\_205  
Taxon 116 -> 34\_CrmB\_VARV\_GAR\_G2R  
Taxon 117 -> 37\_CrmB\_VARV\_BRZ66\_205  
Taxon 118 -> 35\_CrmB\_VARV\_IND64\_205  
Taxon 119 -> 39\_CrmB\_VARV\_CNG70\_205  
Taxon 120 -> 46\_CrmB\_CPXV\_BRI\_230  
Taxon 121 -> 47\_CrmB\_CPXV\_BRI\_005  
Taxon 122 -> 52\_CrmD\_CPXV\_GRI\_K2R  
Taxon 123 -> 53\_CrmD\_CPXV\_BRI\_221  
Taxon 124 -> 54\_CrmD\_ECTV\_MOS\_I1R  
Taxon 125 -> 55\_CrmD\_ECTV\_MOS\_003  
Taxon 126 -> 93\_SCP2\_CPXV\_GRI\_D12L  
Taxon 127 -> 95\_SCP2\_CPXV\_GER\_12  
Taxon 128 -> 96\_SCP2\_CPXV\_BRI\_014  
Taxon 129 -> 94\_SCP2\_ECTV\_MOS\_008  
Taxon 130 -> 50\_CrmB\_MYXV\_LAU\_MT2  
Taxon 131 -> 51\_CrmB\_MYXV\_LAU\_m002L  
Taxon 132 -> 97\_SCP2\_COTV16897\_SCP2\_CO  
Taxon 133 -> 1\_M2\_CPXV\_BRI\_040  
Taxon 134 -> 2\_M2\_CPXV\_GER91\_038  
Taxon 135 -> 61\_M2\_VARV\_IND64\_022  
Taxon 136 -> 64\_M2\_VARV\_CNG70\_022  
Taxon 137 -> 63\_M2\_VARV\_SLN68\_22  
Taxon 138 -> 71\_M2\_VARV\_GUI69\_22  
Taxon 139 -> 69\_M2\_VARV\_BRZ66\_26  
Taxon 140 -> 70\_M2\_VARV\_GAR\_Q2L  
Taxon 141 -> 65\_M2\_TATV\_DAH68\_033  
Taxon 142 -> 62\_M2\_CMLV\_M96\_029  
Taxon 143 -> 66\_M2\_MPXVSL21  
Taxon 144 -> 67\_M2\_MPXV\_Z96\_O2L  
Taxon 145 -> 68\_M2\_HSPV\_034  
Taxon 146 -> 72\_M2\_VACV\_WR\_M2L  
Taxon 147 -> 60\_M2\_COTV028  
Taxon 148 -> 73\_M2\_YKV\_170  
Taxon 149 -> 74\_M2\_MYXV\_LAU\_m154L  
Taxon 150 -> 58\_M2like\_YMTV\_YLD\_9L

```

Taxon 151 -> 59_M2like_DPXV_W83_17
Taxon 152 -> 83_SB87_gp113
Taxon 153 -> 29_CPXV_GER91_3_007
Taxon 154 -> 57_M2like_YKV175
Taxon 155 -> 28_COTV030
Taxon 156 -> 56_DPXV_W83_gp016
Successfully read matrix
Setting default partition (does not divide up characters)
Setting model defaults
Seed (for generating default start values) = 1431529782
Setting output file names to "/infile_converted.phy.run>.p|t>"
Exiting data block
Reached end of file

```

MrBayes >

RECEIVED CMD: mcmc

```

Running Markov chain
MCMC stamp = 6113221175
Seed = 1143393248
Swapseed = 1431529782
Model settings:

```

```

Data not partitioned --
Datatype   = Protein
Aamodel    = Poisson
             Substitution rates are fixed to be equal
Covarion   = No
# States   = 20
             State frequencies are fixed to be equal
Rates      = Equal

```

Active parameters:

```

Parameters
-----
Statefreq      1
Ratemultiplier 2
Topology       3
Brlens         4
-----

1 -- Parameter = Pi
   Type        = Stationary state frequencies
   Prior       = Fixed (equal frequencies)

2 -- Parameter = Ratemultiplier
   Type        = Partition-specific rate multiplier
   Prior       = Fixed(1.0)

3 -- Parameter = Tau
   Type        = Topology
   Prior       = All topologies equally probable a priori
   Subparam.   = V

4 -- Parameter = V
   Type        = Branch lengths
   Prior       = Unconstrained:Exponential(10.0)

```

Number of taxa = 156  
Number of characters = 350

The MCMC sampler will use the following moves:

With prob. Chain will use move

11.11 % ExtSPR(Tau,V)  
11.11 % ExtTBR(Tau,V)  
11.11 % NNI(Tau,V)  
11.11 % ParsSPR(Tau,V)  
44.44 % Multiplier(V)  
11.11 % Nodeslider(V)

Division 1 has 336 unique site patterns

Initializing conditional likelihoods

Using standard non-SSE likelihood calculator for division 1 (single-precision)

Initial log likelihoods and log prior probs for run 1:

Chain 1 -- -100337.123130 -- -326.282876  
Chain 2 -- -98656.446447 -- -326.282876  
Chain 3 -- -95354.126426 -- -326.282876  
Chain 4 -- -99303.131451 -- -326.282876

Initial log likelihoods and log prior probs for run 2:

Chain 1 -- -101624.184772 -- -326.282876  
Chain 2 -- -99273.283493 -- -326.282876  
Chain 3 -- -99216.246530 -- -326.282876  
Chain 4 -- -98804.553615 -- -326.282876

Using a relative burnin of 25.0 % for diagnostics

Chain results (1000000 generations requested):

0 -- [-100337.123] (-98656.446) (-95354.126) (-99303.131) \* [-101624.185] (-99273.283) (-99216.247) (-98804.554)  
500 -- [-76079.549] (-74756.608) (-69722.762) (-77597.318) \* [-71391.180] (-73689.689) (-75133.148) (-72921.178) -- 10:33:01  
1000 -- [-59918.974] (-58862.674) (-55333.571) (-61856.405) \* (-57083.811) (-56805.983) (-55539.747) (-53893.312) -- 10:16:03  
1500 -- (-50123.307) [-47597.865] (-47894.361) (-50767.879) \* (-46853.779) (-48664.701) [-45337.903] (-45621.931) -- 12:12:14  
2000 -- (-43487.255) (-42961.693) [-41511.751] (-42238.992) \* (-39969.492) (-41158.081) [-38298.402] (-40870.138) -- 11:30:17  
2500 -- [-33813.726] (-40099.040) (-37107.456) (-38914.673) \* (-35891.858) (-37451.359) [-33483.004] (-37279.273) -- 11:24:57  
3000 -- [-31038.816] (-36134.217) (-34566.992) (-34697.463) \* (-34188.157) (-34012.835) [-31645.756] (-32008.981) -- 11:21:17  
3500 -- (-29203.196) (-33337.178) (-31942.543) (-32740.889) \* (-31618.155) (-31136.717) (-29677.261) [-29326.265] -- 17:04:58  
4000 -- (-27740.877) (-29923.538) (-30645.752) (-31045.517) \* (-30424.765) (-28891.710) [-27860.974] (-27899.851) -- 16:19:24  
4500 -- [-26544.345] (-27935.541) (-28877.304) (-29172.319) \* (-28593.371) (-27453.323) (-27126.181) [-26612.200] -- 15:43:52  
5000 -- [-25887.752] (-27075.350) (-28223.995) (-27462.534) \* (-27265.680) (-26630.886) [-25866.598] (-26094.593) -- 15:15:24

Average standard deviation of split frequencies: 0.096728

5500 -- [-25460.360] (-26116.658) (-26942.240) (-26581.954) \* (-26698.688) (-25884.951) [-25316.628] (-25282.910) -- 14:52:02  
6000 -- [-25197.010] (-25679.858) (-26375.174) (-26115.931) \* (-25866.500) (-25348.414) (-25055.180) [-24886.920] -- 14:29:45  
6500 -- [-24834.658] (-25254.586) (-26126.558) (-25634.403) \* (-25293.242) (-24957.651) [-24658.187] (-24663.740) -- 14:15:56  
7000 -- (-24527.854) (-24914.555) (-25768.800) (-25335.911) \* (-24821.481) (-24737.873) [-24398.373] (-24424.433) -- 14:01:41  
7500 -- [-24290.520] (-24503.697) (-24979.619) (-25012.150) \* (-24536.397) (-24471.252) [-24166.035] (-24265.436) -- 13:49:17  
8000 -- [-23974.207] (-24346.959) (-24714.387) (-24690.817) \* (-24367.528) (-24352.364) [-24009.992] (-24114.704) -- 13:36:20  
8500 -- [-23840.788] (-24199.283) (-24539.082) (-24636.090) \* (-24154.126) (-24223.660) [-23928.866] (-24029.526) -- 13:24:51  
9000 -- [-23746.926] (-24051.007) (-24287.372) (-24527.304) \* (-24017.599) (-24041.053) [-23797.811] (-23953.643) -- 13:14:38  
9500 -- [-23689.827] (-23948.307) (-24146.959) (-24372.814) \* (-23855.631) (-23950.561) [-23707.445] (-23869.552) -- 13:03:42  
10000 -- [-23649.610] (-23860.551) (-24090.895) (-24305.035) \* (-23757.466) (-23820.719) [-23603.724] (-23733.286) -- 12:53:51

Average standard deviation of split frequencies: 0.146933

10500 -- [-23569.224] (-23809.297) (-23969.477) (-24170.264) \* (-23670.216) (-23762.559) [-23512.477] (-23671.180) -- 12:43:19  
11000 -- [-23535.645] (-23794.611) (-23786.553) (-24078.001) \* (-23614.370) (-23668.873) [-23448.725] (-23603.356) -- 12:36:44  
11500 -- [-23473.689] (-23765.928) (-23680.600) (-24024.911) \* (-23589.572) (-23594.839) [-23397.570] (-23554.109) -- 12:30:41  
12000 -- [-23436.710] (-23699.380) (-23574.643) (-24011.282) \* (-23573.423) (-23529.456) [-23386.568] (-23525.771) -- 12:25:07  
12500 -- [-23440.409] (-23692.964) (-23514.650) (-23913.908) \* (-23530.652) (-23498.369) [-23370.876] (-23499.989) -- 12:19:58  
13000 -- [-23415.370] (-23669.410) (-23492.331) (-23759.177) \* (-23506.737) (-23468.809) [-23351.945] (-23497.693) -- 12:15:11  
13500 -- [-23352.798] (-23655.237) (-23450.594) (-23735.492) \* (-23463.237) (-23438.666) [-23344.451] (-23510.857) -- 12:09:31  
14000 -- [-23322.474] (-23646.184) (-23423.372) (-23677.621) \* (-23428.926) (-23412.857) [-23317.048] (-23476.227) -- 12:05:24  
14500 -- [-23322.853] (-23634.698) (-23405.328) (-23588.845) \* (-23409.349) (-23409.173) [-23303.137] (-23465.176) -- 12:01:34  
15000 -- [-23311.096] (-23600.081) (-23394.994) (-23580.165) \* (-23400.358) (-23408.303) [-23295.107] (-23470.851) -- 11:56:51

Average standard deviation of split frequencies: 0.155555

15500 -- [-23295.231] (-23570.366) (-23386.001) (-23549.540) \* (-23387.244) (-23387.936) [-23295.274] (-23450.236) -- 11:53:29  
16000 -- [-23293.716] (-23584.550) (-23374.016) (-23530.793) \* (-23408.073) (-23359.962) [-23299.852] (-23450.730) -- 11:50:19  
16500 -- [-23297.623] (-23597.250) (-23371.978) (-23500.534) \* (-23379.533) (-23342.845) [-23295.087] (-23436.922) -- 11:48:19  
17000 -- [-23293.003] (-23599.385) (-23357.377) (-23507.345) \* (-23383.816) (-23332.550) [-23292.312] (-23420.229) -- 11:44:29  
17500 -- [-23286.719] (-23579.983) (-23366.523) (-23476.255) \* (-23373.321) (-23319.606) [-23292.813] (-23396.242) -- 11:41:47  
18000 -- [-23304.391] (-23561.843) (-23352.584) (-23466.369) \* (-23347.056) (-23312.127) [-23285.216] (-23421.276) -- 11:38:18  
18500 -- [-23298.806] (-23583.626) (-23348.459) (-23456.851) \* (-23347.376) (-23318.628) [-23261.268] (-23425.029) -- 11:35:53  
19000 -- [-23287.430] (-23580.502) (-23326.781) (-23449.971) \* (-23329.938) (-23300.159) [-23257.599] (-23431.766) -- 11:32:43  
19500 -- [-23295.926] (-23563.952) (-23328.850) (-23441.129) \* (-23336.412) (-23304.337) [-23254.383] (-23431.909) -- 11:29:42  
20000 -- [-23280.191] (-23578.103) (-23328.679) (-23430.000) \* (-23327.787) (-23300.619) [-23249.808] (-23425.515) -- 11:26:49

Average standard deviation of split frequencies: 0.148075

20500 -- [-23270.789] (-23554.286) (-23331.474) (-23437.792) \* (-23330.768) (-23320.304) [-23261.445] (-23423.357) -- 11:23:15  
21000 -- [-23273.115] (-23545.294) (-23326.745) (-23437.293) \* (-23307.173) (-23294.875) [-23246.149] (-23393.031) -- 11:21:24  
21500 -- [-23268.072] (-23539.629) (-23328.656) (-23452.648) \* (-23318.085) (-23285.453) [-23264.146] (-23387.488) -- 11:18:52  
22000 -- [-23264.434] (-23538.124) (-23328.495) (-23448.693) \* (-23329.490) (-23269.082) [-23275.839] (-23380.972) -- 11:17:11  
22500 -- [-23254.883] (-23544.442) (-23313.917) (-23443.991) \* (-23324.461) (-23285.982) [-23263.380] (-23376.915) -- 11:14:50  
23000 -- [-23242.307] (-23533.523) (-23322.114) (-23433.505) \* (-23348.397) (-23286.405) [-23250.951] (-23401.039) -- 11:11:51  
23500 -- [-23249.441] (-23536.160) (-23331.105) (-23443.102) \* (-23336.567) (-23273.924) [-23262.222] (-23382.438) -- 11:09:41  
24000 -- [-23242.450] (-23524.887) (-23322.053) (-23446.348) \* (-23325.670) (-23265.959) [-23262.044] (-23392.387) -- 11:06:56  
24500 -- [-23224.513] (-23518.631) (-23358.754) (-23443.401) \* (-23321.678) (-23266.203) [-23284.177] (-23388.667) -- 11:04:55  
25000 -- [-23225.534] (-23529.130) (-23347.453) (-23424.855) \* (-23332.033) [-23273.998] (-23271.335) (-23381.460) -- 11:02:21

Average standard deviation of split frequencies: 0.123784

25500 -- [-23224.229] (-23525.422) (-23343.522) (-23399.918) \* (-23327.664) [-23252.878] (-23263.038) (-23402.089) -- 11:00:29  
26000 -- [-23234.941] (-23555.049) (-23321.296) (-23413.102) \* (-23333.199) [-23257.645] (-23252.264) (-23413.767) -- 10:58:41  
26500 -- [-23242.817] (-23545.151) (-23315.938) (-23412.658) \* (-23315.214) [-23255.011] [-23257.920] (-23386.255) -- 10:56:57  
27000 -- [-23241.479] (-23547.844) (-23321.907) (-23410.910) \* (-23317.684) [-23252.069] (-23255.633) (-23408.459) -- 10:55:16  
27500 -- [-23245.409] (-23536.055) (-23333.495) (-23409.380) \* (-23334.549) [-23246.137] (-23254.459) (-23404.292) -- 10:53:38  
28000 -- [-23251.138] (-23539.397) (-23301.335) (-23433.031) \* (-23318.265) [-23229.190] (-23251.969) (-23403.518) -- 10:52:03  
28500 -- [-23251.142] (-23529.585) (-23300.833) (-23425.442) \* (-23321.276) (-23254.312) [-23248.055] (-23409.329) -- 10:49:56  
29000 -- [-23240.583] (-23518.762) (-23302.232) (-23406.482) \* (-23314.939) (-23246.033) [-23233.583] (-23415.475) -- 10:48:26  
29500 -- [-23257.771] (-23516.601) (-23308.363) (-23412.676) \* (-23331.279) (-23251.800) [-23231.703] (-23395.759) -- 10:47:00  
30000 -- [-23259.976] (-23508.167) (-23333.645) (-23402.765) \* (-23312.126) [-23235.769] (-23232.195) (-23417.189) -- 10:45:35

Average standard deviation of split frequencies: 0.110779

30500 -- [-23250.545] (-23537.425) (-23323.950) (-23399.932) \* (-23330.735) [-23240.293] (-23237.282) (-23380.284) -- 10:43:41  
31000 -- [-23247.523] (-23545.233) (-23325.946) (-23403.828) \* (-23293.823) [-23235.204] (-23243.263) (-23384.018) -- 10:42:21  
31500 -- [-23245.406] (-23550.538) (-23321.617) (-23392.019) \* (-23313.985) [-23240.047] (-23255.238) (-23385.136) -- 10:40:32  
32000 -- [-23256.533] (-23548.124) (-23329.003) (-23386.871) \* (-23303.586) [-23245.804] (-23271.572) (-23393.019) -- 10:38:46  
32500 -- [-23254.801] (-23526.620) (-23328.981) (-23399.379) \* (-23303.369) [-23241.201] (-23281.309) (-23391.421) -- 10:37:33  
33000 -- [-23252.611] (-23526.176) (-23325.742) (-23393.672) \* (-23313.974) [-23273.868] (-23280.903) (-23381.271) -- 10:35:52  
33500 -- [-23258.012] (-23516.462) (-23323.902) (-23371.009) \* (-23334.049) (-23262.696) [-23267.841] (-23370.926) -- 10:34:42  
34000 -- [-23254.745] (-23524.067) (-23316.089) (-23371.322) \* (-23320.121) [-23254.560] (-23268.247) (-23361.823) -- 10:33:34  
34500 -- [-23260.769] (-23527.676) (-23300.725) (-23393.849) \* (-23304.179) [-23266.675] (-23288.333) (-23369.394) -- 10:32:28  
35000 -- [-23232.162] (-23503.986) (-23286.415) (-23384.584) \* (-23297.726) [-23255.649] (-23282.221) (-23352.481) -- 10:30:55

Average standard deviation of split frequencies: 0.099419

35500 -- [-23242.743] (-23506.644) (-23296.047) (-23391.392) \* (-23301.190) [-23244.405] (-23278.079) (-23364.889) -- 10:29:52  
36000 -- [-23238.772] (-23506.581) (-23309.886) (-23398.989) \* (-23315.293) [-23241.143] (-23283.733) (-23365.951) -- 10:28:23  
36500 -- [-23252.028] (-23455.375) (-23316.547) (-23398.456) \* (-23295.079) [-23252.326] (-23273.594) (-23365.781) -- 10:27:22  
37000 -- [-23248.286] (-23467.225) (-23318.006) (-23400.824) \* (-23296.284) [-23256.054] (-23285.729) (-23359.612) -- 10:25:57  
37500 -- [-23249.853] (-23455.903) (-23308.728) (-23384.347) \* (-23296.531) [-23242.977] (-23290.458) (-23383.119) -- 10:24:59  
38000 -- [-23237.215] (-23471.774) (-23299.904) (-23378.176) \* (-23303.022) [-23239.279] (-23300.333) (-23398.520) -- 10:24:02  
38500 -- [-23244.219] (-23463.906) (-23323.040) (-23382.154) \* (-23297.920) [-23245.082] (-23311.243) (-23390.570) -- 10:23:06  
39000 -- [-23254.059] (-23474.669) (-23307.714) (-23386.132) \* (-23311.572) [-23244.394] (-23305.082) (-23386.144) -- 10:22:11  
39500 -- [-23235.958] (-23443.901) (-23307.312) (-23370.469) \* (-23304.808) [-23244.185] (-23293.320) (-23391.041) -- 10:21:17  
40000 -- [-23240.706] (-23449.546) (-23314.117) (-23357.246) \* (-23284.259) [-23265.392] (-23301.930) (-23396.850) -- 10:20:24

Average standard deviation of split frequencies: 0.093195

40500 -- [-23244.863] (-23447.577) (-23313.008) (-23359.198) \* (-23285.876) [-23267.358] (-23319.255) (-23395.424) -- 10:19:31  
41000 -- [-23255.715] (-23454.976) (-23300.254) (-23374.128) \* (-23259.922) [-23271.837] (-23302.551) (-23389.744) -- 10:18:40  
41500 -- [-23275.054] (-23481.370) (-23314.853) (-23384.178) \* (-23268.662) [-23284.715] (-23292.403) (-23389.803) -- 10:17:49  
42000 -- [-23285.379] (-23485.774) (-23308.981) (-23385.154) \* (-23284.003) [-23292.060] (-23298.263) (-23407.771) -- 10:16:59  
42500 -- [-23274.839] (-23505.481) (-23301.716) (-23386.400) \* (-23267.061) [-23281.940] (-23306.817) (-23416.927) -- 10:16:10  
43000 -- [-23279.999] (-23496.181) (-23302.617) (-23383.211) \* (-23263.679) [-23265.452] (-23298.603) (-23406.191) -- 10:15:22  
43500 -- [-23262.934] (-23507.012) (-23290.777) (-23364.668) \* (-23266.764) [-23271.176] (-23277.723) (-23391.226) -- 10:14:34  
44000 -- [-23263.830] (-23506.114) (-23273.552) (-23366.612) \* (-23271.192) [-23250.157] (-23279.320) (-23397.702) -- 10:13:47  
44500 -- [-23257.834] (-23481.619) (-23292.243) (-23386.490) \* (-23244.578) [-23229.986] (-23282.794) (-23394.669) -- 10:13:01  
45000 -- [-23246.921] (-23477.191) (-23312.009) (-23389.989) \* (-23266.882) [-23241.783] (-23274.595) (-23390.976) -- 10:12:36

Average standard deviation of split frequencies: 0.087227

45500 -- [-23249.112] (-23477.350) (-23302.680) (-23389.973) \* (-23271.820) [-23240.330] (-23285.185) (-23394.573) -- 10:11:51  
46000 -- [-23249.127] (-23495.516) (-23299.341) (-23393.762) \* (-23253.567) [-23262.467] (-23289.949) (-23362.297) -- 10:11:27  
46500 -- [-23270.313] (-23491.127) (-23308.471) (-23405.646) \* (-23253.436) [-23251.169] (-23268.283) (-23377.527) -- 10:10:43  
47000 -- [-23268.080] (-23500.808) (-23296.771) (-23391.463) \* (-23244.592) [-23282.008] (-23256.219) (-23384.371) -- 10:10:19  
47500 -- [-23253.990] (-23476.544) (-23294.022) (-23381.498) \* (-23245.410) (-23269.903) (-23252.554) (-23390.913) -- 10:09:36  
48000 -- [-23249.232] (-23465.697) (-23310.851) (-23375.466) \* (-23248.896) (-23289.947) (-23269.027) (-23397.914) -- 10:09:12  
48500 -- [-23243.445] (-23469.197) (-23315.655) (-23381.527) \* (-23241.833) (-23289.277) (-23279.366) (-23400.828) -- 10:08:30  
49000 -- [-23244.954] (-23460.050) (-23309.472) (-23390.917) \* (-23230.164) (-23290.636) (-23282.076) (-23387.555) -- 10:07:47  
49500 -- [-23233.676] (-23461.945) (-23309.230) (-23402.870) \* (-23229.071) (-23285.345) (-23282.192) (-23379.098) -- 10:07:06  
50000 -- [-23245.922] (-23471.850) (-23307.579) (-23408.055) \* (-23233.776) (-23280.824) (-23280.911) (-23380.011) -- 10:06:25

Average standard deviation of split frequencies: 0.082068

50500 -- [-23245.155] (-23480.011) (-23300.894) (-23397.201) \* (-23239.327) (-23287.326) (-23285.064) (-23394.698) -- 10:05:44  
51000 -- [-23241.973] (-23475.168) (-23318.578) (-23398.622) \* (-23257.350) (-23275.147) (-23276.788) (-23385.153) -- 10:04:45  
51500 -- [-23213.546] (-23480.431) (-23318.057) (-23405.723) \* (-23268.379) (-23274.627) (-23291.933) (-23370.941) -- 10:04:05  
52000 -- [-23215.870] (-23446.997) (-23331.281) (-23398.369) \* (-23250.741) (-23300.727) (-23276.926) (-23385.180) -- 10:03:26  
52500 -- [-23243.085] (-23457.055) (-23330.281) (-23397.527) \* (-23253.047) (-23288.028) (-23277.377) (-23359.842) -- 10:02:47  
53000 -- [-23244.841] (-23470.065) (-23340.728) (-23380.201) \* (-23233.012) (-23292.515) (-23284.877) (-23341.173) -- 10:02:08  
53500 -- [-23234.334] (-23469.542) (-23331.015) (-23389.311) \* (-23235.287) (-23279.281) (-23277.449) (-23340.306) -- 10:01:48  
54000 -- [-23229.933] (-23454.248) (-23325.551) (-23383.559) \* (-23218.288) (-23288.319) (-23283.698) (-23358.247) -- 10:01:10  
54500 -- [-23234.696] (-23457.093) (-23324.141) (-23359.856) \* (-23215.869) (-23300.521) (-23287.969) (-23355.875) -- 10:00:33  
55000 -- [-23237.908] (-23433.354) (-23334.237) (-23379.073) \* (-23212.622) (-23297.752) (-23264.596) (-23350.051) -- 9:59:55

Average standard deviation of split frequencies: 0.074835

55500 -- [-23255.969] (-23459.731) (-23309.444) (-23373.452) \* (-23224.926) (-23280.372) (-23257.377) (-23350.613) -- 9:59:36  
56000 -- [-23234.104] (-23470.843) (-23302.028) (-23372.252) \* (-23225.430) (-23299.044) (-23242.412) (-23347.731) -- 9:58:59  
56500 -- [-23241.169] (-23463.917) (-23302.799) (-23357.834) \* (-23229.193) (-23314.495) (-23255.031) (-23366.731) -- 9:58:39  
57000 -- [-23221.859] (-23470.459) (-23306.316) (-23361.263) \* (-23240.431) (-23311.605) (-23269.223) (-23374.128) -- 9:58:03  
57500 -- [-23227.505] (-23438.564) (-23300.750) (-23381.562) \* (-23230.070) (-23304.874) (-23260.956) (-23357.845) -- 9:57:27  
58000 -- [-23213.068] (-23421.613) (-23312.014) (-23392.349) \* (-23222.496) (-23276.266) (-23263.185) (-23352.854) -- 9:57:08  
58500 -- [-23217.823] (-23423.165) (-23305.962) (-23391.803) \* (-23217.785) (-23261.476) (-23289.988) (-23356.619) -- 9:56:33  
59000 -- [-23234.307] (-23433.182) (-23289.747) (-23395.816) \* (-23216.011) (-23257.145) (-23285.095) (-23342.903) -- 9:56:13  
59500 -- [-23240.393] (-23457.176) (-23291.471) (-23393.380) \* (-23216.191) (-23266.687) (-23291.049) (-23366.241) -- 9:55:39  
60000 -- [-23232.874] (-23453.740) (-23296.112) (-23393.821) \* (-23232.557) (-23283.688) (-23310.534) (-23348.985) -- 9:55:20

Average standard deviation of split frequencies: 0.070203

60500 -- [-23211.161] (-23450.972) (-23263.162) (-23407.330) \* (-23215.061) (-23289.581) (-23317.502) (-23368.880) -- 9:54:45  
61000 -- [-23214.833] (-23453.762) (-23270.834) (-23366.690) \* (-23210.514) (-23288.590) (-23315.777) (-23368.422) -- 9:53:55  
61500 -- [-23221.792] (-23465.205) (-23269.502) (-23374.145) \* (-23216.007) (-23283.577) (-23327.576) (-23386.358) -- 9:53:21

62000 -- [-23214.034] (-23454.492) (-23278.415) (-23377.180) \* [-23209.740] (-23286.331) (-23337.517) (-23382.663) -- 9:52:48  
62500 -- [-23218.369] (-23439.341) (-23276.714) (-23376.384) \* [-23220.001] (-23296.053) (-23329.812) (-23394.158) -- 9:52:00  
63000 -- [-23225.481] (-23446.847) (-23282.327) (-23392.713) \* [-23225.304] (-23275.667) (-23330.337) (-23367.320) -- 9:50:57  
63500 -- [-23229.048] (-23450.298) (-23289.572) (-23380.216) \* [-23238.250] (-23282.270) (-23324.132) (-23362.681) -- 9:50:24  
64000 -- [-23221.827] (-23436.369) (-23289.447) (-23377.284) \* [-23240.643] (-23288.457) (-23326.350) (-23363.940) -- 9:49:37  
64500 -- [-23229.762] (-23437.571) (-23296.924) (-23378.350) \* [-23227.967] (-23278.556) (-23315.441) (-23389.224) -- 9:49:05  
65000 -- [-23223.546] (-23414.538) (-23277.147) (-23360.887) \* [-23232.388] (-23260.257) (-23303.579) (-23412.394) -- 9:48:34

Average standard deviation of split frequencies: 0.066035

65500 -- [-23217.798] (-23425.979) (-23284.461) (-23367.901) \* [-23238.513] (-23251.955) (-23301.547) (-23401.192) -- 9:48:02  
66000 -- [-23231.138] (-23426.289) (-23286.045) (-23373.514) \* [-23249.888] [-23241.714] (-23296.606) (-23407.695) -- 9:47:31  
66500 -- [-23231.189] (-23429.191) (-23287.262) (-23373.581) \* [-23228.092] [-23234.081] (-23291.601) (-23428.074) -- 9:47:00  
67000 -- [-23227.977] (-23453.323) (-23290.068) (-23393.906) \* [-23227.203] [-23244.654] (-23273.612) (-23410.710) -- 9:46:29  
67500 -- [-23238.690] (-23455.077) (-23320.121) (-23414.379) \* [-23250.828] [-23236.728] (-23283.396) (-23407.884) -- 9:45:58  
68000 -- [-23230.549] (-23453.695) (-23300.289) (-23415.080) \* [-23256.939] [-23227.991] (-23283.368) (-23395.635) -- 9:45:28  
68500 -- [-23216.938] (-23457.394) (-23320.798) (-23408.372) \* [-23264.222] [-23208.474] (-23280.423) (-23390.494) -- 9:44:57  
69000 -- [-23228.025] (-23438.479) (-23301.979) (-23401.809) \* [-23279.951] [-23209.671] (-23300.536) (-23399.442) -- 9:44:27  
69500 -- [-23229.198] (-23416.608) (-23292.415) (-23396.814) \* [-23282.822] [-23244.228] (-23298.225) (-23388.159) -- 9:43:44  
70000 -- [-23221.205] (-23407.645) (-23289.626) (-23400.511) \* [-23271.031] [-23242.155] (-23306.552) (-23374.811) -- 9:43:14

Average standard deviation of split frequencies: 0.065922

70500 -- [-23232.337] (-23379.339) (-23313.715) (-23379.085) \* (-23296.158) [-23247.283] (-23297.286) (-23393.864) -- 9:42:45  
71000 -- [-23239.113] (-23393.063) (-23318.046) (-23378.814) \* (-23283.135) [-23251.157] (-23294.463) (-23384.736) -- 9:42:15  
71500 -- [-23228.969] (-23414.623) (-23315.204) (-23385.286) \* (-23283.249) [-23258.743] (-23288.954) (-23389.304) -- 9:41:46  
72000 -- [-23221.418] (-23407.331) (-23321.344) (-23378.648) \* (-23288.084) [-23238.408] (-23274.272) (-23382.525) -- 9:41:00  
72500 -- [-23225.332] (-23419.821) (-23323.832) (-23351.438) \* (-23292.066) (-23255.123) [-23243.786] (-23371.285) -- 9:40:48  
73000 -- [-23235.954] (-23444.762) (-23329.182) (-23349.603) \* (-23290.888) (-23245.280) [-23250.532] (-23370.510) -- 9:40:19  
73500 -- [-23231.168] (-23427.276) (-23304.634) (-23369.704) \* (-23292.527) (-23264.533) [-23243.580] (-23367.615) -- 9:39:51  
74000 -- [-23253.396] (-23415.782) (-23334.212) (-23349.663) \* (-23284.397) [-23268.078] (-23265.879) (-23388.414) -- 9:39:22  
74500 -- [-23248.661] (-23387.017) (-23317.504) (-23376.421) \* (-23287.949) [-23259.114] (-23260.738) (-23362.162) -- 9:38:54  
75000 -- [-23248.807] (-23342.046) (-23316.670) (-23386.784) \* (-23300.535) (-23258.793) [-23250.132] (-23354.619) -- 9:38:38

Average standard deviation of split frequencies: 0.064068

75500 -- [-23270.025] (-23351.820) (-23297.451) (-23401.045) \* (-23290.431) (-23268.126) [-23262.729] (-23347.241) -- 9:38:22  
76000 -- [-23271.627] (-23304.282) (-23301.752) (-23413.448) \* (-23285.195) [-23255.492] (-23259.860) (-23354.541) -- 9:37:54  
76500 -- [-23265.335] (-23267.306) (-23318.870) (-23419.897) \* (-23271.625) [-23264.724] (-23265.660) (-23360.028) -- 9:37:38  
77000 -- [-23285.073] (-23267.616) (-23314.074) (-23418.843) \* (-23263.558) [-23256.257] (-23266.900) (-23353.065) -- 9:37:10  
77500 -- [-23280.922] (-23264.715) (-23322.283) (-23409.971) \* (-23269.123) [-23251.660] (-23281.452) (-23368.682) -- 9:36:42  
78000 -- [-23258.305] (-23272.007) (-23307.376) (-23392.354) \* (-23255.539) [-23262.090] (-23266.633) (-23370.667) -- 9:36:15  
78500 -- [-23244.878] (-23260.581) (-23300.069) (-23398.308) \* (-23266.236) [-23256.232] (-23275.714) (-23359.749) -- 9:35:35  
79000 -- [-23261.536] (-23270.567) (-23296.923) (-23381.134) \* (-23297.352) [-23251.818] (-23265.392) (-23357.049) -- 9:35:08  
79500 -- [-23259.485] (-23263.475) (-23303.398) (-23400.745) \* (-23290.151) (-23252.594) [-23255.504] (-23329.866) -- 9:34:41  
80000 -- [-23255.773] (-23258.759) (-23317.181) (-23389.560) \* (-23315.178) [-23241.289] (-23262.102) (-23333.167) -- 9:34:14

Average standard deviation of split frequencies: 0.061816

80500 -- [-23256.682] (-23265.333) (-23329.564) (-23402.691) \* (-23287.089) [-23233.341] (-23263.363) (-23342.995) -- 9:33:58  
81000 -- [-23259.894] (-23271.289) (-23329.029) (-23409.769) \* (-23281.610) [-23232.194] (-23260.043) (-23364.830) -- 9:33:31  
81500 -- [-23258.094] (-23255.998) (-23359.048) (-23432.939) \* (-23273.056) (-23255.359) [-23254.905] (-23371.758) -- 9:33:15  
82000 -- [-23255.547] (-23247.426) (-23359.773) (-23409.446) \* (-23283.391) [-23254.633] (-23261.338) (-23378.355) -- 9:32:49  
82500 -- [-23257.367] (-23255.800) (-23339.632) (-23394.503) \* (-23275.722) (-23262.862) [-23253.460] (-23382.309) -- 9:32:22  
83000 -- [-23253.891] (-23251.194) (-23329.237) (-23380.774) \* (-23286.766) (-23277.547) [-23272.180] (-23387.862) -- 9:32:06  
83500 -- [-23243.934] (-23268.368) (-23344.570) (-23380.564) \* (-23298.265) (-23258.672) [-23268.368] (-23385.773) -- 9:31:40  
84000 -- [-23233.395] (-23264.790) (-23352.938) (-23366.970) \* (-23281.450) (-23250.621) (-23263.859) (-23393.568) -- 9:31:13  
84500 -- [-23234.869] (-23260.361) (-23345.526) (-23378.207) \* (-23279.688) (-23255.413) (-23267.422) (-23383.113) -- 9:30:47  
85000 -- [-23256.664] (-23259.985) (-23310.362) (-23399.434) \* (-23305.452) [-23254.787] (-23273.489) (-23407.317) -- 9:30:31

Average standard deviation of split frequencies: 0.060088

85500 -- [-23247.469] (-23257.673) (-23317.931) (-23388.014) \* (-23296.865) [-23247.109] (-23268.981) (-23420.630) -- 9:29:54  
86000 -- [-23245.347] (-23255.683) (-23306.687) (-23384.386) \* (-23296.121) [-23255.628] (-23250.953) (-23405.435) -- 9:29:28  
86500 -- [-23249.636] (-23257.145) (-23325.667) (-23382.208) \* (-23292.104) (-23264.162) [-23255.386] (-23397.660) -- 9:29:02  
87000 -- [-23254.767] (-23245.814) (-23317.894) (-23384.886) \* (-23298.078) (-23267.219) [-23262.094] (-23393.903) -- 9:28:36  
87500 -- (-23258.221) (-23253.174) (-23298.455) (-23384.752) \* (-23302.069) (-23283.578) [-23252.326] (-23372.649) -- 9:28:11  
88000 -- (-23238.348) (-23254.322) (-23328.973) (-23415.808) \* (-23301.796) (-23284.008) [-23258.689] (-23389.281) -- 9:27:45  
88500 -- (-23254.443) (-23250.806) (-23335.864) (-23407.255) \* (-23293.703) (-23290.016) [-23260.901] (-23363.289) -- 9:27:19  
89000 -- (-23269.856) (-23245.286) (-23351.587) (-23407.814) \* (-23253.097) (-23300.241) (-23261.412) (-23376.169) -- 9:26:54  
89500 -- (-23272.568) (-23250.312) (-23349.607) (-23397.616) \* (-23253.836) (-23295.579) [-23246.727] (-23402.402) -- 9:26:38  
90000 -- (-23253.859) [-23242.923] (-23343.736) (-23408.652) \* (-23268.086) (-23304.084) [-23234.731] (-23390.744) -- 9:26:23

Average standard deviation of split frequencies: 0.056611

90500 -- [-23248.789] (-23253.943) (-23337.663) (-23417.964) \* (-23273.752) (-23295.690) [-23237.417] (-23394.580) -- 9:25:58  
91000 -- [-23261.750] (-23257.397) (-23323.027) (-23401.860) \* (-23255.936) (-23286.526) [-23234.893] (-23389.425) -- 9:25:32  
91500 -- [-23268.431] (-23258.451) (-23323.680) (-23384.947) \* (-23252.652) (-23274.031) [-23236.407] (-23395.223) -- 9:25:17  
92000 -- [-23269.509] (-23263.461) (-23324.399) (-23387.497) \* (-23250.409) (-23280.143) [-23249.493] (-23395.815) -- 9:24:52  
92500 -- [-23270.448] (-23261.636) (-23320.275) (-23410.024) \* (-23250.463) (-23294.030) [-23243.602] (-23393.853) -- 9:24:26  
93000 -- (-23272.247) [-23253.138] (-23326.913) (-23404.590) \* (-23255.227) (-23293.732) (-23271.340) (-23399.946) -- 9:24:11  
93500 -- (-23277.668) [-23250.455] (-23342.438) (-23390.690) \* (-23254.600) (-23290.573) (-23275.190) (-23386.848) -- 9:23:56  
94000 -- (-23264.637) (-23257.474) (-23338.280) (-23399.349) \* (-23246.010) (-23280.438) [-23272.390] (-23364.447) -- 9:23:40  
94500 -- (-23285.487) (-23248.095) (-23329.096) (-23361.360) \* (-23263.329) (-23263.248) [-23256.787] (-23367.619) -- 9:23:25  
95000 -- (-23279.357) (-23254.517) (-23330.002) (-23366.307) \* (-23252.118) (-23272.718) [-23257.741] (-23359.477) -- 9:23:09

Average standard deviation of split frequencies: 0.054643

95500 -- (-23277.055) [-23240.482] (-23342.751) (-23373.604) \* (-23266.388) (-23284.916) [-23262.225] (-23365.091) -- 9:22:44  
96000 -- (-23262.235) [-23243.464] (-23354.918) (-23353.057) \* (-23281.392) (-23262.479) [-23240.636] (-23369.322) -- 9:22:29  
96500 -- (-23247.834) [-23244.269] (-23337.517) (-23322.205) \* (-23293.471) (-23276.385) [-23244.309] (-23352.447) -- 9:22:04  
97000 -- (-23253.474) [-23261.331] (-23350.793) (-23327.271) \* (-23294.620) (-23282.594) [-23230.680] (-23364.752) -- 9:21:39  
97500 -- [-23241.114] (-23252.067) (-23355.915) (-23331.945) \* (-23279.253) (-23254.313) [-23238.566] (-23366.728) -- 9:21:24  
98000 -- (-23248.266) (-23247.271) (-23362.310) (-23335.675) \* (-23293.316) [-23244.744] (-23245.872) (-23363.619) -- 9:21:08  
98500 -- (-23239.059) (-23227.216) (-23349.470) (-23330.950) \* (-23295.935) (-23254.517) [-23233.414] (-23376.226) -- 9:20:43  
99000 -- (-23257.018) (-23231.985) (-23343.092) (-23327.147) \* (-23275.678) (-23255.895) [-23241.342] (-23359.248) -- 9:20:28  
99500 -- (-23237.092) (-23237.494) (-23351.163) (-23303.788) \* (-23281.595) (-23273.979) [-23240.861] (-23367.414) -- 9:20:12  
100000 -- (-23235.283) (-23228.297) (-23332.940) (-23296.122) \* (-23274.875) (-23256.879) [-23220.407] (-23361.855) -- 9:19:48

Average standard deviation of split frequencies: 0.054997

100500 -- (-23254.201) [-23238.147] (-23326.724) (-23312.910) \* (-23282.189) (-23271.868) [-23209.330] (-23347.834) -- 9:19:32  
101000 -- (-23265.977) (-23242.990) (-23348.082) (-23316.523) \* (-23259.339) (-23284.877) [-23214.042] (-23362.135) -- 9:19:16  
101500 -- (-23268.984) [-23246.111] (-23348.004) (-23342.222) \* (-23245.123) (-23301.031) [-23220.001] (-23373.818) -- 9:18:52  
102000 -- (-23250.610) [-23248.686] (-23336.379) (-23327.139) \* (-23250.288) (-23288.838) [-23223.016] (-23395.035) -- 9:18:27  
102500 -- (-23254.254) [-23244.180] (-23328.023) (-23336.565) \* (-23236.556) (-23280.433) (-23239.172) (-23386.758) -- 9:18:03  
103000 -- (-23248.302) [-23249.996] (-23353.520) (-23335.875) \* [-23243.991] (-23273.234) (-23251.336) (-23377.527) -- 9:17:47  
103500 -- (-23255.910) [-23241.219] (-23383.910) (-23334.307) \* [-23247.644] (-23263.188) (-23256.933) (-23373.673) -- 9:17:32

104000 -- (-23239.314) [-23230.408] (-23356.650) (-23340.581) \* (-23279.035) [-23246.892] (-23255.541) (-23387.056) -- 9:17:16  
104500 -- [-23236.182] (-23250.727) (-23349.382) (-23350.459) \* (-23279.818) (-23256.116) [-23240.709] (-23391.769) -- 9:16:52  
105000 -- (-23260.357) [-23256.899] (-23351.777) (-23341.224) \* (-23276.760) (-23262.405) [-23255.268] (-23405.430) -- 9:16:36

Average standard deviation of split frequencies: 0.053950

105500 -- (-23250.185) [-23246.242] (-23323.963) (-23325.927) \* (-23275.241) (-23280.348) [-23276.580] (-23389.563) -- 9:16:12  
106000 -- (-23264.102) [-23255.343] (-23347.892) (-23324.525) \* (-23279.367) (-23293.333) [-23285.608] (-23385.961) -- 9:15:56  
106500 -- (-23269.180) [-23232.860] (-23337.822) (-23318.317) \* (-23277.572) (-23276.933) [-23270.044] (-23397.419) -- 9:15:40  
107000 -- (-23269.642) [-23241.014] (-23318.947) (-23312.204) \* (-23268.923) (-23263.757) [-23264.878] (-23394.330) -- 9:15:16  
107500 -- [-23249.427] (-23260.298) (-23353.835) (-23308.459) \* (-23284.313) (-23261.003) [-23255.792] (-23372.069) -- 9:14:52  
108000 -- [-23236.764] (-23269.949) (-23348.581) (-23308.245) \* (-23304.200) (-23254.051) [-23254.877] (-23385.999) -- 9:14:28  
108500 -- [-23233.400] (-23282.704) (-23334.740) (-23328.215) \* (-23288.875) (-23266.546) [-23265.488] (-23401.175) -- 9:14:04  
109000 -- [-23228.578] (-23271.636) (-23327.480) (-23341.635) \* (-23271.751) [-23256.572] (-23267.833) (-23370.839) -- 9:13:48  
109500 -- [-23231.618] (-23258.170) (-23343.920) (-23311.637) \* [-23287.231] (-23254.769) (-23273.745) (-23387.351) -- 9:13:24  
110000 -- [-23232.022] (-23266.829) (-23329.219) (-23308.913) \* (-23259.451) [-23253.438] (-23253.222) (-23399.084) -- 9:13:00

Average standard deviation of split frequencies: 0.052258

110500 -- [-23229.755] (-23286.477) (-23317.878) (-23299.053) \* (-23258.672) (-23244.494) [-23263.669] (-23391.312) -- 9:12:37  
111000 -- [-23231.038] (-23271.354) (-23316.979) (-23292.474) \* (-23261.558) [-23238.690] (-23258.680) (-23387.383) -- 9:12:13  
111500 -- [-23236.247] (-23251.455) (-23319.025) (-23297.175) \* (-23257.984) [-23244.180] (-23262.883) (-23385.484) -- 9:11:49  
112000 -- [-23236.736] (-23259.472) (-23308.174) (-23296.337) \* (-23275.949) [-23258.101] (-23272.091) (-23357.095) -- 9:11:25  
112500 -- [-23235.948] (-23267.718) (-23322.278) (-23308.259) \* (-23282.776) [-23246.574] (-23270.650) (-23369.964) -- 9:11:10  
113000 -- (-23260.077) [-23247.120] (-23339.917) (-23332.648) \* (-23293.490) [-23237.521] (-23286.097) (-23384.841) -- 9:10:46  
113500 -- [-23262.009] (-23269.633) (-23323.192) (-23309.316) \* (-23289.094) [-23246.048] (-23267.254) (-23392.535) -- 9:10:23  
114000 -- (-23255.298) [-23273.978] (-23308.494) (-23298.459) \* (-23282.060) (-23266.666) [-23257.772] (-23359.492) -- 9:09:59  
114500 -- (-23259.602) [-23267.507] (-23334.412) (-23301.013) \* (-23300.424) (-23275.029) [-23252.843] (-23367.669) -- 9:09:28  
115000 -- (-23257.978) [-23261.216] (-23335.810) (-23303.567) \* (-23312.690) [-23269.068] (-23255.666) (-23356.518) -- 9:09:05

Average standard deviation of split frequencies: 0.050855

115500 -- (-23271.943) [-23240.486] (-23341.615) (-23313.567) \* (-23324.591) (-23264.599) [-23252.210] (-23348.399) -- 9:08:41  
116000 -- (-23267.527) [-23258.168] (-23335.819) (-23330.191) \* (-23293.652) (-23258.861) (-23260.939) (-23353.939) -- 9:08:10  
116500 -- (-23252.249) [-23259.364] (-23317.693) (-23315.823) \* (-23291.646) (-23261.411) (-23266.181) (-23355.681) -- 9:07:47  
117000 -- (-23241.246) [-23264.926] (-23318.863) (-23317.709) \* (-23290.880) (-23254.196) [-23247.283] (-23382.281) -- 9:07:24  
117500 -- (-23265.377) [-23252.899] (-23331.169) (-23333.515) \* (-23279.425) (-23268.685) [-23249.158] (-23396.126) -- 9:07:01  
118000 -- (-23264.210) [-23239.731] (-23328.119) (-23326.382) \* (-23294.547) (-23253.929) [-23238.793] (-23384.452) -- 9:06:45  
118500 -- (-23271.764) [-23239.820] (-23327.112) (-23328.131) \* (-23302.536) (-23247.703) [-23255.627] (-23371.383) -- 9:06:22  
119000 -- (-23266.813) [-23235.774] (-23347.529) (-23325.960) \* (-23287.599) [-23247.336] (-23272.551) (-23370.191) -- 9:05:59  
119500 -- (-23279.598) [-23244.056] (-23359.042) (-23332.529) \* (-23281.007) [-23228.948] (-23286.328) (-23348.178) -- 9:05:29  
120000 -- (-23281.579) [-23248.417] (-23339.080) (-23320.187) \* [-23266.351] (-23249.717) (-23281.919) (-23348.719) -- 9:05:06

Average standard deviation of split frequencies: 0.050501

120500 -- (-23276.109) [-23241.496] (-23319.491) (-23326.435) \* [-23271.691] (-23256.291) (-23302.915) (-23359.280) -- 9:04:51  
121000 -- (-23270.261) [-23241.314] (-23312.310) (-23314.123) \* [-23264.422] (-23253.317) (-23313.082) (-23382.142) -- 9:04:28  
121500 -- (-23255.356) [-23251.990] (-23321.864) (-23310.224) \* [-23259.234] (-23247.891) (-23304.742) (-23386.387) -- 9:04:05  
122000 -- [-23259.800] (-23253.747) (-23319.832) (-23306.823) \* [-23258.450] (-23224.171) (-23312.375) (-23381.638) -- 9:03:42  
122500 -- [-23259.095] (-23249.827) (-23307.992) (-23328.237) \* (-23261.044) [-23234.280] (-23281.651) (-23375.952) -- 9:03:20  
123000 -- (-23263.613) [-23252.987] (-23337.479) (-23298.453) \* (-23254.920) [-23242.305] (-23278.373) (-23378.780) -- 9:02:57  
123500 -- (-23266.323) (-23248.228) (-23345.582) (-23294.736) \* (-23270.035) [-23222.931] (-23295.411) (-23379.719) -- 9:02:27  
124000 -- (-23277.280) [-23247.611] (-23331.276) (-23296.036) \* (-23266.224) [-23224.719] (-23301.611) (-23355.824) -- 9:02:05  
124500 -- (-23276.807) [-23242.444] (-23334.191) (-23328.560) \* (-23255.548) [-23233.560] (-23300.356) (-23372.663) -- 9:01:42  
125000 -- (-23266.173) [-23251.118] (-23344.455) (-23319.466) \* [-23234.103] (-23235.018) (-23298.132) (-23378.620) -- 9:01:20

Average standard deviation of split frequencies: 0.050566

125500 -- (-23275.836) [-23250.967] (-23346.483) (-23296.649) \* (-23256.164) [-23224.328] (-23288.151) (-23383.759) -- 9:00:57  
126000 -- (-23256.230) [-23239.843] (-23351.871) (-23288.716) \* (-23277.941) [-23229.413] (-23289.454) (-23360.592) -- 9:00:35  
126500 -- (-23273.605) [-23247.964] (-23349.050) (-23276.160) \* (-23268.076) [-23217.771] (-23282.190) (-23392.882) -- 9:00:12  
127000 -- (-23263.272) [-23254.777] (-23375.618) (-23299.243) \* (-23278.205) [-23229.065] (-23306.659) (-23384.314) -- 8:59:43  
127500 -- (-23277.119) [-23247.118] (-23362.075) (-23316.967) \* (-23250.996) [-23221.925] (-23299.560) (-23368.004) -- 8:59:21  
128000 -- [-23256.561] (-23262.566) (-23340.747) (-23297.823) \* (-23270.840) [-23210.672] (-23303.649) (-23375.960) -- 8:58:52  
128500 -- (-23251.736) [-23244.967] (-23353.635) (-23281.623) \* (-23258.176) [-23226.711] (-23290.475) (-23375.660) -- 8:58:23  
129000 -- (-23263.655) [-23262.139] (-23347.579) (-23288.424) \* (-23252.583) [-23234.848] (-23258.967) (-23370.139) -- 8:58:01  
129500 -- (-23279.649) [-23248.255] (-23347.369) (-23297.944) \* (-23271.514) [-23233.676] (-23248.866) (-23373.500) -- 8:57:25  
130000 -- (-23285.841) [-23240.621] (-23344.886) (-23282.121) \* (-23251.614) [-23228.639] (-23258.438) (-23357.775) -- 8:56:50

Average standard deviation of split frequencies: 0.049686

130500 -- (-23276.956) [-23238.773] (-23343.324) (-23275.187) \* (-23252.962) [-23238.142] (-23262.229) (-23352.041) -- 8:56:21  
131000 -- (-23262.552) [-23244.726] (-23316.310) (-23276.306) \* (-23237.477) [-23234.202] (-23263.957) (-23360.682) -- 8:55:46  
131500 -- (-23235.588) [-23239.312] (-23308.628) (-23291.261) \* (-23253.555) [-23244.214] (-23247.156) (-23364.629) -- 8:55:17  
132000 -- (-23248.270) [-23237.822] (-23315.286) (-23306.133) \* (-23281.529) [-23240.650] (-23252.066) (-23376.851) -- 8:54:43  
132500 -- (-23244.463) [-23245.868] (-23315.446) (-23289.050) \* (-23300.048) [-23216.613] (-23250.174) (-23382.061) -- 8:54:14  
133000 -- (-23245.115) [-23267.691] (-23302.847) (-23287.443) \* (-23307.185) [-23232.154] (-23261.226) (-23397.118) -- 8:53:46  
133500 -- [-23243.721] (-23239.112) (-23315.178) (-23287.776) \* (-23309.124) [-23240.893] (-23263.767) (-23406.475) -- 8:53:12  
134000 -- (-23254.462) [-23261.127] (-23310.625) (-23293.223) \* (-23310.083) [-23230.600] (-23255.874) (-23400.370) -- 8:52:44  
134500 -- (-23268.257) [-23266.233] (-23327.612) (-23306.962) \* (-23313.966) [-23239.068] (-23257.099) (-23380.446) -- 8:52:16  
135000 -- (-23280.511) [-23240.672] (-23336.329) (-23307.045) \* (-23319.181) [-23253.587] (-23263.945) (-23385.671) -- 8:51:48

Average standard deviation of split frequencies: 0.047586

135500 -- (-23271.028) [-23251.735] (-23334.849) (-23308.845) \* (-23318.403) (-23248.983) [-23234.862] (-23383.659) -- 8:51:21  
136000 -- (-23255.714) [-23222.704] (-23309.253) (-23293.835) \* (-23302.346) (-23266.981) [-23259.294] (-23406.895) -- 8:50:53  
136500 -- (-23255.748) [-23221.970] (-23287.839) (-23296.379) \* (-23293.612) (-23254.616) (-23274.358) (-23412.442) -- 8:50:26  
137000 -- (-23259.242) [-23220.872] (-23271.495) (-23282.430) \* (-23297.695) [-23245.299] (-23280.500) (-23432.054) -- 8:49:58  
137500 -- (-23258.959) [-23211.439] (-23292.869) (-23310.697) \* (-23317.632) [-23253.637] (-23275.850) (-23420.996) -- 8:49:31  
138000 -- (-23256.093) [-23215.360] (-23300.542) (-23301.867) \* (-23328.887) [-23243.270] (-23265.680) (-23398.466) -- 8:49:04  
138500 -- [-23252.991] (-23225.872) (-23300.142) (-23322.619) \* (-23302.245) (-23239.612) (-23249.052) (-23395.474) -- 8:48:36  
139000 -- (-23255.358) [-23216.278] (-23294.840) (-23315.720) \* (-23311.056) (-23256.167) [-23237.575] (-23390.053) -- 8:48:09  
139500 -- (-23235.823) [-23230.401] (-23298.238) (-23324.713) \* (-23275.895) [-23254.582] (-23227.134) (-23413.262) -- 8:47:42  
140000 -- [-23229.616] (-23240.716) (-23273.321) (-23341.519) \* (-23272.443) (-23251.615) [-23221.775] (-23400.991) -- 8:47:15

Average standard deviation of split frequencies: 0.045397

140500 -- [-23233.884] (-23239.779) (-23267.078) (-23306.442) \* (-23263.374) (-23251.059) [-23224.397] (-23389.366) -- 8:46:54  
141000 -- [-23231.479] (-23237.953) (-23289.879) (-23302.518) \* (-23257.479) (-23286.888) [-23239.129] (-23396.269) -- 8:46:28  
141500 -- [-23247.430] (-23254.455) (-23288.628) (-23291.908) \* (-23270.158) (-23266.844) [-23249.363] (-23392.323) -- 8:46:01  
142000 -- [-23252.149] (-23262.050) (-23285.245) (-23293.343) \* (-23266.782) (-23259.975) [-23239.018] (-23393.975) -- 8:45:40  
142500 -- [-23246.789] (-23283.717) (-23292.978) (-23287.355) \* (-23263.860) (-23252.718) (-23253.467) (-23375.879) -- 8:45:13  
143000 -- [-23243.929] (-23278.950) (-23304.731) (-23284.520) \* (-23235.682) (-23237.797) (-23258.887) (-23385.265) -- 8:44:53  
143500 -- [-23235.326] (-23264.300) (-23318.233) (-23301.164) \* (-23242.225) (-23237.167) (-23265.252) (-23362.673) -- 8:44:26  
144000 -- [-23236.007] (-23275.584) (-23303.163) (-23302.721) \* (-23251.396) (-23230.316) (-23280.519) (-23343.358) -- 8:44:06  
144500 -- [-23239.667] (-23263.949) (-23281.604) (-23297.921) \* (-23251.966) (-23245.875) (-23289.480) (-23347.550) -- 8:43:45  
145000 -- [-23251.422] (-23295.174) (-23282.760) (-23290.142) \* (-23265.653) (-23265.392) (-23275.386) (-23342.793) -- 8:43:25



Average standard deviation of split frequencies: 0.043040

|        |    |              |              |              |              |   |              |              |              |              |    |         |
|--------|----|--------------|--------------|--------------|--------------|---|--------------|--------------|--------------|--------------|----|---------|
| 145500 | -- | [-23251.219] | [-23302.715] | [-23258.908] | [-23312.537] | * | [-23261.471] | [-23256.146] | [-23282.144] | [-23350.352] | -- | 8:42:58 |
| 146000 | -- | [-23265.244] | [-23279.774] | [-23255.931] | [-23326.492] | * | [-23253.572] | [-23264.427] | [-23256.637] | [-23351.642] | -- | 8:42:32 |
| 146500 | -- | [-23273.077] | [-23269.896] | [-23254.920] | [-23340.088] | * | [-23253.498] | [-23248.261] | [-23262.402] | [-23382.118] | -- | 8:42:11 |
| 147000 | -- | [-23276.032] | [-23267.156] | [-23268.062] | [-23337.228] | * | [-23259.891] | [-23266.182] | [-23277.291] | [-23380.280] | -- | 8:41:45 |
| 147500 | -- | [-23251.656] | [-23258.337] | [-23255.917] | [-23344.754] | * | [-23279.145] | [-23256.373] | [-23255.774] | [-23362.874] | -- | 8:41:19 |
| 148000 | -- | [-23253.201] | [-23283.623] | [-23235.349] | [-23310.224] | * | [-23264.755] | [-23250.239] | [-23255.687] | [-23365.695] | -- | 8:40:53 |
| 148500 | -- | [-23272.691] | [-23267.075] | [-23235.870] | [-23300.015] | * | [-23275.617] | [-23251.848] | [-23251.177] | [-23365.777] | -- | 8:40:27 |
| 149000 | -- | [-23283.094] | [-23275.909] | [-23219.403] | [-23329.127] | * | [-23297.957] | [-23249.179] | [-23236.670] | [-23365.110] | -- | 8:40:01 |
| 149500 | -- | [-23284.671] | [-23268.778] | [-23239.878] | [-23322.404] | * | [-23308.033] | [-23248.717] | [-23232.067] | [-23384.892] | -- | 8:39:35 |
| 150000 | -- | [-23284.540] | [-23290.150] | [-23231.366] | [-23306.464] | * | [-23296.910] | [-23262.842] | [-23227.363] | [-23383.196] | -- | 8:39:15 |

Average standard deviation of split frequencies: 0.042770

|        |    |              |              |              |              |   |              |              |              |              |    |         |
|--------|----|--------------|--------------|--------------|--------------|---|--------------|--------------|--------------|--------------|----|---------|
| 150500 | -- | [-23258.275] | [-23294.767] | [-23250.925] | [-23310.336] | * | [-23304.971] | [-23263.668] | [-23229.520] | [-23379.980] | -- | 8:38:49 |
| 151000 | -- | [-23246.833] | [-23263.136] | [-23262.693] | [-23314.270] | * | [-23306.330] | [-23271.117] | [-23233.146] | [-23377.883] | -- | 8:38:23 |
| 151500 | -- | [-23254.965] | [-23259.075] | [-23263.177] | [-23307.755] | * | [-23305.025] | [-23264.200] | [-23232.083] | [-23374.565] | -- | 8:37:58 |
| 152000 | -- | [-23268.632] | [-23243.043] | [-23256.806] | [-23300.680] | * | [-23306.209] | [-23254.014] | [-23239.980] | [-23368.370] | -- | 8:37:32 |
| 152500 | -- | [-23277.453] | [-23250.182] | [-23247.962] | [-23293.284] | * | [-23308.499] | [-23235.297] | [-23237.113] | [-23384.258] | -- | 8:37:06 |
| 153000 | -- | [-23271.679] | [-23251.312] | [-23251.559] | [-23298.191] | * | [-23313.432] | [-23219.483] | [-23237.066] | [-23360.261] | -- | 8:36:41 |
| 153500 | -- | [-23263.938] | [-23229.018] | [-23239.326] | [-23303.700] | * | [-23318.794] | [-23221.218] | [-23244.207] | [-23352.811] | -- | 8:36:21 |
| 154000 | -- | [-23270.127] | [-23217.554] | [-23247.840] | [-23308.476] | * | [-23301.366] | [-23211.638] | [-23243.908] | [-23367.919] | -- | 8:35:55 |
| 154500 | -- | [-23289.525] | [-23234.157] | [-23245.242] | [-23304.432] | * | [-23305.614] | [-23229.078] | [-23226.773] | [-23358.482] | -- | 8:35:30 |
| 155000 | -- | [-23283.426] | [-23247.968] | [-23246.827] | [-23309.817] | * | [-23305.629] | [-23250.474] | [-23230.795] | [-23361.076] | -- | 8:35:05 |

Average standard deviation of split frequencies: 0.042730

|        |    |              |              |              |              |   |              |              |              |              |    |         |
|--------|----|--------------|--------------|--------------|--------------|---|--------------|--------------|--------------|--------------|----|---------|
| 155500 | -- | [-23279.664] | [-23263.338] | [-23233.243] | [-23310.112] | * | [-23308.535] | [-23246.159] | [-23247.744] | [-23338.247] | -- | 8:34:39 |
| 156000 | -- | [-23264.661] | [-23244.575] | [-23226.441] | [-23327.104] | * | [-23323.971] | [-23253.943] | [-23252.804] | [-23347.069] | -- | 8:34:14 |
| 156500 | -- | [-23264.664] | [-23257.298] | [-23243.597] | [-23322.852] | * | [-23319.277] | [-23237.370] | [-23238.921] | [-23329.330] | -- | 8:33:54 |
| 157000 | -- | [-23247.546] | [-23288.608] | [-23232.638] | [-23313.174] | * | [-23311.772] | [-23274.831] | [-23237.283] | [-23319.708] | -- | 8:33:29 |
| 157500 | -- | [-23257.066] | [-23292.038] | [-23236.342] | [-23304.520] | * | [-23279.997] | [-23290.735] | [-23262.650] | [-23359.069] | -- | 8:33:04 |
| 158000 | -- | [-23261.958] | [-23307.857] | [-23237.876] | [-23330.634] | * | [-23290.621] | [-23283.405] | [-23255.964] | [-23338.578] | -- | 8:32:39 |
| 158500 | -- | [-23282.455] | [-23319.069] | [-23247.195] | [-23308.729] | * | [-23298.920] | [-23269.475] | [-23252.216] | [-23353.384] | -- | 8:32:14 |
| 159000 | -- | [-23287.894] | [-23289.330] | [-23235.392] | [-23325.260] | * | [-23274.497] | [-23282.205] | [-23239.890] | [-23372.908] | -- | 8:31:49 |
| 159500 | -- | [-23271.449] | [-23288.033] | [-23229.674] | [-23300.575] | * | [-23277.700] | [-23270.553] | [-23228.199] | [-23369.219] | -- | 8:31:24 |
| 160000 | -- | [-23269.790] | [-23272.073] | [-23245.001] | [-23303.442] | * | [-23286.837] | [-23258.079] | [-23220.677] | [-23363.454] | -- | 8:30:59 |

Average standard deviation of split frequencies: 0.042454

|        |    |              |              |              |              |   |              |              |              |              |    |         |
|--------|----|--------------|--------------|--------------|--------------|---|--------------|--------------|--------------|--------------|----|---------|
| 160500 | -- | [-23273.156] | [-23260.959] | [-23246.255] | [-23295.393] | * | [-23253.442] | [-23270.453] | [-23214.650] | [-23388.375] | -- | 8:30:40 |
| 161000 | -- | [-23280.587] | [-23260.132] | [-23248.071] | [-23295.718] | * | [-23268.540] | [-23272.445] | [-23222.690] | [-23378.719] | -- | 8:30:15 |
| 161500 | -- | [-23296.977] | [-23242.624] | [-23231.809] | [-23290.794] | * | [-23276.932] | [-23273.884] | [-23225.244] | [-23359.011] | -- | 8:29:45 |
| 162000 | -- | [-23289.553] | [-23253.129] | [-23240.277] | [-23300.834] | * | [-23291.876] | [-23258.301] | [-23224.298] | [-23343.770] | -- | 8:29:21 |
| 162500 | -- | [-23298.742] | [-23264.267] | [-23243.045] | [-23325.483] | * | [-23284.765] | [-23264.721] | [-23237.315] | [-23343.060] | -- | 8:28:56 |
| 163000 | -- | [-23305.356] | [-23286.085] | [-23232.736] | [-23339.788] | * | [-23290.657] | [-23278.810] | [-23226.290] | [-23321.277] | -- | 8:28:37 |
| 163500 | -- | [-23270.017] | [-23281.012] | [-23239.633] | [-23348.461] | * | [-23277.219] | [-23296.528] | [-23249.181] | [-23309.824] | -- | 8:28:17 |
| 164000 | -- | [-23273.293] | [-23288.919] | [-23239.170] | [-23355.522] | * | [-23280.739] | [-23276.698] | [-23241.642] | [-23309.805] | -- | 8:27:53 |
| 164500 | -- | [-23273.584] | [-23295.499] | [-23233.563] | [-23336.409] | * | [-23285.756] | [-23305.141] | [-23241.275] | [-23322.064] | -- | 8:27:33 |
| 165000 | -- | [-23269.445] | [-23286.952] | [-23242.548] | [-23351.354] | * | [-23272.268] | [-23287.712] | [-23242.232] | [-23327.363] | -- | 8:27:14 |

Average standard deviation of split frequencies: 0.041213

|        |    |              |              |              |              |   |              |              |              |              |    |         |
|--------|----|--------------|--------------|--------------|--------------|---|--------------|--------------|--------------|--------------|----|---------|
| 165500 | -- | [-23270.431] | [-23289.094] | [-23225.938] | [-23347.204] | * | [-23272.452] | [-23282.281] | [-23242.808] | [-23347.006] | -- | 8:26:55 |
| 166000 | -- | [-23259.490] | [-23307.940] | [-23249.390] | [-23344.293] | * | [-23283.354] | [-23265.986] | [-23250.404] | [-23351.364] | -- | 8:26:35 |
| 166500 | -- | [-23243.653] | [-23281.799] | [-23243.543] | [-23320.488] | * | [-23293.050] | [-23275.736] | [-23266.268] | [-23342.814] | -- | 8:26:16 |
| 167000 | -- | [-23232.871] | [-23286.210] | [-23246.895] | [-23347.716] | * | [-23306.440] | [-23269.457] | [-23261.865] | [-23350.614] | -- | 8:25:57 |
| 167500 | -- | [-23227.103] | [-23257.752] | [-23239.087] | [-23319.073] | * | [-23298.935] | [-23284.190] | [-23261.394] | [-23342.801] | -- | 8:25:37 |
| 168000 | -- | [-23231.329] | [-23265.577] | [-23233.941] | [-23326.460] | * | [-23296.603] | [-23281.394] | [-23264.825] | [-23352.194] | -- | 8:25:18 |
| 168500 | -- | [-23210.136] | [-23271.664] | [-23239.540] | [-23329.870] | * | [-23286.545] | [-23286.278] | [-23263.711] | [-23371.795] | -- | 8:24:54 |
| 169000 | -- | [-23223.495] | [-23279.093] | [-23243.802] | [-23327.037] | * | [-23252.444] | [-23264.213] | [-23283.809] | [-23383.278] | -- | 8:24:34 |
| 169500 | -- | [-23223.055] | [-23261.822] | [-23269.160] | [-23327.040] | * | [-23239.655] | [-23248.269] | [-23275.279] | [-23372.193] | -- | 8:24:10 |
| 170000 | -- | [-23229.166] | [-23265.772] | [-23286.768] | [-23340.299] | * | [-23249.387] | [-23235.976] | [-23259.680] | [-23352.682] | -- | 8:23:46 |

Average standard deviation of split frequencies: 0.039856

|        |    |              |              |              |              |   |              |              |              |              |    |         |
|--------|----|--------------|--------------|--------------|--------------|---|--------------|--------------|--------------|--------------|----|---------|
| 170500 | -- | [-23222.365] | [-23263.912] | [-23262.779] | [-23331.624] | * | [-23245.093] | [-23237.607] | [-23281.413] | [-23364.617] | -- | 8:23:27 |
| 171000 | -- | [-23232.929] | [-23245.212] | [-23268.618] | [-23313.923] | * | [-23237.053] | [-23231.946] | [-23300.395] | [-23370.903] | -- | 8:23:08 |
| 171500 | -- | [-23238.068] | [-23252.068] | [-23280.062] | [-23330.361] | * | [-23254.851] | [-23242.316] | [-23306.543] | [-23367.057] | -- | 8:22:48 |
| 172000 | -- | [-23241.740] | [-23260.178] | [-23265.213] | [-23341.118] | * | [-23260.428] | [-23248.819] | [-23304.197] | [-23364.387] | -- | 8:22:34 |
| 172500 | -- | [-23246.857] | [-23263.344] | [-23266.278] | [-23353.904] | * | [-23259.536] | [-23239.887] | [-23314.157] | [-23367.184] | -- | 8:22:15 |
| 173000 | -- | [-23230.908] | [-23253.475] | [-23258.785] | [-23347.307] | * | [-23254.498] | [-23233.420] | [-23299.634] | [-23359.805] | -- | 8:21:56 |
| 173500 | -- | [-23242.054] | [-23241.551] | [-23242.409] | [-23324.168] | * | [-23259.939] | [-23236.875] | [-23292.738] | [-23350.865] | -- | 8:21:36 |
| 174000 | -- | [-23240.718] | [-23246.226] | [-23250.622] | [-23340.426] | * | [-23257.215] | [-23242.589] | [-23309.780] | [-23367.939] | -- | 8:21:22 |
| 174500 | -- | [-23242.726] | [-23275.212] | [-23254.693] | [-23346.892] | * | [-23249.502] | [-23241.700] | [-23299.548] | [-23379.091] | -- | 8:21:03 |
| 175000 | -- | [-23240.810] | [-23268.136] | [-23258.500] | [-23348.916] | * | [-23260.292] | [-23261.815] | [-23297.005] | [-23348.120] | -- | 8:20:48 |

Average standard deviation of split frequencies: 0.038916

|        |    |              |              |              |              |   |              |              |              |              |    |         |
|--------|----|--------------|--------------|--------------|--------------|---|--------------|--------------|--------------|--------------|----|---------|
| 175500 | -- | [-23253.282] | [-23278.560] | [-23255.854] | [-23331.735] | * | [-23261.320] | [-23272.599] | [-23315.637] | [-23340.529] | -- | 8:20:39 |
| 176000 | -- | [-23272.510] | [-23293.414] | [-23257.565] | [-23296.041] | * | [-23269.235] | [-23278.756] | [-23286.802] | [-23333.772] | -- | 8:20:29 |
| 176500 | -- | [-23264.409] | [-23285.301] | [-23260.891] | [-23285.700] | * | [-23261.280] | [-23277.237] | [-23309.570] | [-23347.594] | -- | 8:20:14 |
| 177000 | -- | [-23286.818] | [-23287.289] | [-23261.798] | [-23274.245] | * | [-23262.964] | [-23285.748] | [-23302.066] | [-23335.768] | -- | 8:19:59 |
| 177500 | -- | [-23264.167] | [-23269.191] | [-23284.594] | [-23273.922] | * | [-23276.368] | [-23297.618] | [-23302.908] | [-23344.726] | -- | 8:19:45 |
| 178000 | -- | [-23266.627] | [-23260.937] | [-23306.878] | [-23290.042] | * | [-23268.420] | [-23304.944] | [-23312.011] | [-23349.026] | -- | 8:19:30 |
| 178500 | -- | [-23241.412] | [-23265.204] | [-23279.938] | [-23283.534] | * | [-23275.949] | [-23290.417] | [-23315.090] | [-23357.691] | -- | 8:19:15 |
| 179000 | -- | [-23230.637] | [-23268.681] | [-23280.938] | [-23306.094] | * | [-23264.169] | [-23294.585] | [-23301.271] | [-23354.105] | -- | 8:18:56 |
| 179500 | -- | [-23225.500] | [-23265.854] | [-23276.993] | [-23319.863] | * | [-23272.574] | [-23284.817] | [-23296.869] | [-23355.975] | -- | 8:18:37 |
| 180000 | -- | [-23232.046] | [-23243.332] | [-23266.768] | [-23331.868] | * | [-23267.356] | [-23266.585] | [-23280.058] | [-23360.294] | -- | 8:18:18 |

Average standard deviation of split frequencies: 0.038348

|        |    |              |              |              |              |   |              |              |              |              |    |         |
|--------|----|--------------|--------------|--------------|--------------|---|--------------|--------------|--------------|--------------|----|---------|
| 180500 | -- | [-23253.491] | [-23254.773] | [-23241.858] | [-23322.734] | * | [-23271.710] | [-23257.549] | [-23277.574] | [-23363.307] | -- | 8:17:58 |
| 181000 | -- | [-23257.580] | [-23259.750] | [-23251.892] | [-23340.901] | * | [-23272.806] | [-23295.596] | [-23279.409] | [-23340.351] | -- | 8:17:39 |
| 181500 | -- | [-23276.235] | [-23277.261] | [-23259.696] | [-23351.332] | * | [-23254.771] | [-23318.197] | [-23270.634] | [-23320.421] | -- | 8:17:24 |
| 18     |    |              |              |              |              |   |              |              |              |              |    |         |

186500 -- (-23314.255) [-23264.421] (-23285.706) (-23326.606) \* (-23245.334) [-23237.889] (-23260.427) (-23338.332) -- 8:14:25  
187000 -- (-23323.407) (-23262.202) [-23248.717] (-23312.252) \* (-23250.268) [-23246.152] (-23253.319) (-23345.391) -- 8:14:06  
187500 -- (-23325.643) [-23263.160] [-23253.242] (-23295.073) \* (-23243.541) [-23251.664] (-23244.419) (-23340.425) -- 8:13:42  
188000 -- (-23336.446) (-23269.628) [-23246.599] (-23310.163) \* (-23256.291) [-23246.959] [-23238.569] (-23325.805) -- 8:13:23  
188500 -- (-23331.068) (-23279.488) [-23228.119] (-23281.450) \* (-23248.445) [-23246.541] (-23243.820) (-23329.401) -- 8:13:04  
189000 -- (-23306.527) (-23262.202) [-23233.182] (-23293.437) \* (-23242.752) [-23251.170] (-23248.079) (-23339.961) -- 8:12:40  
189500 -- (-23312.783) (-23261.040) [-23244.819] (-23292.264) \* (-23245.384) [-23255.909] (-23267.366) (-23321.916) -- 8:12:17  
190000 -- (-23289.093) (-23247.675) [-23243.439] (-23297.413) \* (-23254.047) [-23252.360] (-23273.883) (-23324.776) -- 8:11:58

Average standard deviation of split frequencies: 0.036494

190500 -- (-23275.169) (-23248.741) [-23239.666] (-23289.921) \* (-23263.334) [-23238.804] (-23292.723) (-23313.501) -- 8:11:34  
191000 -- (-23288.762) [-23257.194] (-23253.318) (-23301.828) \* (-23267.066) [-23235.703] (-23259.946) (-23316.726) -- 8:11:15  
191500 -- (-23288.508) [-23264.982] (-23254.000) (-23303.763) \* (-23269.029) [-23238.000] (-23272.493) (-23315.127) -- 8:10:52  
192000 -- (-23288.452) [-23265.767] (-23257.829) (-23303.035) \* (-23235.158) [-23251.625] (-23276.789) (-23307.670) -- 8:10:33  
192500 -- (-23280.633) [-23266.008] (-23261.635) (-23289.283) \* (-23246.082) [-23256.026] (-23277.149) (-23348.998) -- 8:10:09  
193000 -- (-23277.851) [-23255.258] [-23238.188] (-23266.277) \* (-23249.382) [-23250.600] (-23284.219) (-23346.555) -- 8:09:54  
193500 -- (-23289.935) (-23264.374) [-23236.058] (-23271.797) \* (-23269.838) [-23251.378] (-23273.850) (-23373.972) -- 8:09:35  
194000 -- (-23313.024) (-23270.750) [-23231.246] (-23255.185) \* (-23280.228) (-23252.004) [-23263.491] (-23370.373) -- 8:09:12  
194500 -- (-23307.841) (-23285.010) [-23238.394] (-23255.392) \* (-23296.784) (-23253.004) [-23256.949] (-23343.170) -- 8:08:49  
195000 -- (-23306.727) (-23279.944) [-23245.161] (-23264.688) \* (-23292.367) (-23250.704) [-23242.432] (-23348.828) -- 8:08:30

Average standard deviation of split frequencies: 0.035065

195500 -- (-23312.225) (-23260.136) [-23246.365] (-23253.153) \* (-23293.221) (-23267.262) [-23226.324] (-23338.904) -- 8:08:11  
196000 -- (-23321.433) (-23267.099) (-23248.317) [-23243.819] \* (-23285.342) (-23272.923) [-23224.606] (-23338.810) -- 8:07:52  
196500 -- (-23324.501) (-23275.458) (-23262.775) [-23244.533] \* (-23284.339) (-23265.023) [-23225.686] (-23358.405) -- 8:07:33  
197000 -- (-23321.218) (-23267.365) [-23282.648] [-23240.735] \* (-23284.731) (-23271.104) [-23214.759] (-23384.874) -- 8:07:10  
197500 -- (-23313.252) (-23260.039) [-23279.213] (-23248.020) \* (-23300.370) (-23264.079) [-23222.228] (-23393.575) -- 8:06:51  
198000 -- (-23327.033) [-23246.011] (-23271.835) (-23253.703) \* (-23285.194) (-23252.822) (-23241.010) (-23359.800) -- 8:06:36  
198500 -- (-23302.844) (-23236.928) [-23288.313] (-23248.453) \* (-23288.034) (-23239.820) [-23245.508] (-23366.577) -- 8:06:17  
199000 -- (-23312.722) [-23234.276] (-23278.327) (-23242.793) \* (-23291.596) [-23233.903] (-23245.172) (-23345.505) -- 8:05:58  
199500 -- (-23305.964) (-23255.369) (-23266.587) [-23244.034] \* (-23272.511) (-23244.316) [-23225.065] (-23347.873) -- 8:05:43  
200000 -- (-23311.019) (-23246.688) (-23261.884) [-23241.103] \* (-23276.284) (-23244.637) [-23253.853] (-23355.749) -- 8:05:24

Average standard deviation of split frequencies: 0.034040

200500 -- (-23324.366) [-23267.555] (-23271.138) (-23254.522) \* (-23267.739) [-23237.635] (-23266.884) (-23378.938) -- 8:05:04  
201000 -- (-23322.740) (-23283.907) [-23274.097] (-23246.484) \* (-23283.575) [-23234.474] (-23262.106) (-23359.392) -- 8:04:45  
201500 -- (-23341.552) (-23279.495) [-23259.205] (-23229.891) \* (-23278.361) [-23225.847] (-23252.156) (-23354.102) -- 8:04:30  
202000 -- (-23320.703) (-23279.019) [-23281.392] [-23246.333] \* (-23266.899) [-23227.933] (-23251.915) (-23379.142) -- 8:04:11  
202500 -- (-23318.790) (-23285.322) (-23270.046) [-23253.923] \* (-23266.979) [-23207.228] (-23250.511) (-23377.214) -- 8:03:56  
203000 -- (-23315.533) (-23277.164) (-23279.277) [-23261.936] \* (-23260.027) [-23209.233] (-23258.317) (-23369.023) -- 8:03:37  
203500 -- (-23293.449) [-23256.873] (-23292.567) (-23273.418) \* (-23244.142) [-23214.094] (-23259.675) (-23360.325) -- 8:03:18  
204000 -- (-23297.410) [-23247.326] (-23288.067) (-23283.741) \* (-23252.243) [-23233.319] (-23270.888) (-23366.768) -- 8:02:55  
204500 -- (-23308.747) [-23240.280] [-23273.973] (-23271.189) \* (-23245.983) (-23243.005) (-23259.445) (-23360.103) -- 8:02:40  
205000 -- (-23315.113) [-23226.428] (-23302.005) (-23252.849) \* (-23245.297) (-23272.183) [-23261.872] (-23357.866) -- 8:02:21

Average standard deviation of split frequencies: 0.033468

205500 -- (-23310.336) [-23226.198] (-23296.574) (-23258.963) \* (-23262.648) [-23263.527] (-23261.300) (-23350.369) -- 8:02:06  
206000 -- (-23310.084) [-23234.725] (-23312.116) (-23246.233) \* (-23259.317) [-23263.354] (-23276.347) (-23364.227) -- 8:01:51  
206500 -- (-23318.040) [-23249.119] (-23307.281) (-23251.295) \* (-23264.727) [-23270.965] (-23283.406) (-23335.033) -- 8:01:32  
207000 -- (-23323.740) [-23255.698] (-23300.110) (-23243.663) \* (-23242.077) (-23273.269) (-23272.532) (-23329.952) -- 8:01:13  
207500 -- (-23292.597) [-23257.375] (-23289.606) [-23237.026] \* (-23240.829) (-23262.909) (-23276.180) (-23328.650) -- 8:00:54  
208000 -- (-23278.058) [-23248.389] (-23303.416) (-23242.204) \* (-23248.207) (-23270.390) (-23259.415) (-23354.407) -- 8:00:35  
208500 -- (-23280.231) (-23256.490) (-23280.419) [-23245.979] \* (-23248.622) (-23288.798) (-23259.632) (-23333.909) -- 8:00:16  
209000 -- (-23269.827) [-23246.063] (-23293.399) (-23259.418) \* (-23232.007) (-23295.258) (-23243.728) (-23340.288) -- 7:59:53  
209500 -- (-23270.460) [-23250.001] (-23303.925) (-23278.711) \* (-23228.387) (-23309.515) (-23258.094) (-23332.830) -- 7:59:34  
210000 -- (-23256.409) [-23253.109] (-23297.920) (-23279.547) \* (-23231.012) (-23289.871) (-23246.291) (-23330.975) -- 7:59:16

Average standard deviation of split frequencies: 0.031386

210500 -- (-23241.349) (-23260.294) (-23291.404) (-23299.793) \* (-23238.539) (-23283.290) (-23249.588) (-23330.810) -- 7:58:57  
211000 -- (-23240.250) [-23251.507] (-23306.076) (-23296.972) \* (-23233.158) (-23288.821) (-23263.723) (-23320.241) -- 7:58:38  
211500 -- (-23228.006) [-23272.899] (-23295.808) (-23275.556) \* (-23256.876) (-23290.017) (-23274.917) (-23333.742) -- 7:58:19  
212000 -- (-23222.126) [-23294.295] (-23290.581) (-23279.675) \* (-23251.544) (-23288.980) (-23301.633) (-23328.359) -- 7:58:00  
212500 -- (-23224.512) (-23289.174) (-23292.859) (-23276.271) \* (-23236.875) (-23293.564) (-23323.839) (-23319.857) -- 7:57:41  
213000 -- (-23242.196) (-23266.524) (-23295.911) (-23263.775) \* (-23248.427) (-23290.105) (-23299.876) (-23319.810) -- 7:57:22  
213500 -- (-23260.031) (-23285.131) (-23287.682) [-23249.800] \* (-23245.394) (-23284.531) (-23299.006) (-23310.039) -- 7:56:59  
214000 -- (-23271.047) [-23281.286] (-23303.127) (-23278.047) \* (-23241.302) (-23265.769) (-23314.695) (-23322.449) -- 7:56:40  
214500 -- (-23282.774) (-23275.365) (-23296.819) [-23264.241] \* (-23252.586) (-23256.595) (-23293.231) (-23344.089) -- 7:56:18  
215000 -- (-23327.661) (-23279.479) (-23287.385) [-23249.164] \* (-23250.468) (-23255.908) (-23271.821) (-23330.225) -- 7:55:55

Average standard deviation of split frequencies: 0.030341

215500 -- (-23313.182) (-23273.555) (-23285.271) [-23238.223] \* (-23253.386) [-23241.454] (-23279.625) (-23328.154) -- 7:55:33  
216000 -- (-23299.664) (-23289.054) (-23296.703) [-23232.719] \* (-23260.190) (-23254.285) (-23274.146) (-23361.865) -- 7:55:10  
216500 -- (-23310.797) (-23296.752) (-23299.288) [-23251.028] \* (-23240.489) (-23248.166) (-23274.961) (-23367.738) -- 7:54:48  
217000 -- (-23293.370) (-23287.467) (-23293.710) [-23243.441] \* (-23240.302) (-23253.620) (-23282.957) (-23352.645) -- 7:54:25  
217500 -- (-23279.215) (-23285.931) (-23286.533) [-23244.462] \* (-23242.385) (-23263.930) (-23270.111) (-23354.971) -- 7:54:07  
218000 -- (-23277.038) (-23294.907) (-23279.903) [-23239.198] \* (-23261.939) (-23257.599) (-23300.587) (-23344.379) -- 7:53:44  
218500 -- (-23264.647) (-23299.684) (-23271.420) [-23241.268] \* (-23247.118) (-23255.805) (-23291.873) (-23350.707) -- 7:53:22  
219000 -- (-23267.252) (-23319.071) (-23261.632) [-23228.289] \* (-23236.072) (-23273.582) (-23300.399) (-23351.417) -- 7:52:59  
219500 -- (-23279.738) (-23307.765) (-23265.564) [-23228.890] \* (-23238.807) (-23255.379) (-23285.296) (-23344.877) -- 7:52:41  
220000 -- (-23282.381) (-23323.471) (-23254.329) [-23237.432] \* (-23238.777) (-23248.930) (-23290.018) (-23334.302) -- 7:52:18

Average standard deviation of split frequencies: 0.029585

220500 -- (-23262.897) (-23304.232) (-23248.491) [-23219.596] \* (-23251.401) [-23249.327] (-23278.506) (-23323.942) -- 7:52:00  
221000 -- (-23260.748) (-23304.706) (-23270.632) [-23252.694] \* (-23260.196) [-23243.148] (-23280.438) (-23358.887) -- 7:51:44  
221500 -- (-23254.607) (-23286.527) (-23287.644) [-23237.867] \* (-23268.720) [-23239.733] (-23274.948) (-23341.887) -- 7:51:26  
222000 -- (-23246.834) (-23309.513) (-23302.579) [-23224.975] \* (-23277.063) (-23253.050) (-23260.592) (-23364.149) -- 7:51:07  
222500 -- (-23258.596) (-23314.277) (-23311.418) [-23226.147] \* (-23265.990) (-23263.892) (-23257.492) (-23340.817) -- 7:50:48  
223000 -- (-23249.505) (-23279.594) (-23305.853) [-23242.292] \* (-23260.975) (-23266.501) (-23250.137) (-23328.989) -- 7:50:29  
223500 -- (-23256.556) (-23278.993) (-23314.585) [-23262.416] \* (-23257.174) (-23258.833) (-23243.518) (-23332.737) -- 7:50:14  
224000 -- (-23256.229) (-23270.629) (-23288.705) [-23259.879] \* (-23254.251) (-23264.901) (-23243.173) (-23318.933) -- 7:49:55  
224500 -- (-23257.408) (-23277.529) (-23265.467) [-23260.059] \* (-23256.288) (-23250.533) (-23214.957) (-23346.564) -- 7:49:37  
225000 -- (-23230.839) (-23283.100) (-23268.358) (-23257.593) \* (-23264.815) (-23240.473) [-23230.164] (-23343.180) -- 7:49:14

Average standard deviation of split frequencies: 0.028742

225500 -- (-23226.739) (-23293.724) (-23284.848) (-23276.581) \* (-23280.882) (-23248.351) [-23222.536] (-23342.214) -- 7:48:52  
226000 -- (-23223.347) (-23283.553) (-23267.632) (-23287.093) \* (-23282.311) (-23263.470) [-23229.131] (-23345.519) -- 7:48:34  
226500 -- (-23226.076) (-23285.291) (-23283.183) (-23290.451) \* (-23251.899) (-23252.028) (-23238.077) (-23347.983) -- 7:48:11  
227000 -- (-23239.534) (-23281.869) (-23313.434) (-23295.468) \* (-23253.449) (-23260.376) (-23231.275) (-23333.230) -- 7:47:49  
227500 -- (-23229.440) (-23281.697) (-23294.509) (-23280.031) \* (-23254.322) (-23262.311) (-23239.374) (-23320.648) -- 7:47:31  
228000 -- (-23244.948) (-23274.795) (-23308.338) (-23269.498) \* (-23267.365) (-23263.013) [-23249.980] (-23338.961) -- 7:47:09

228500 -- (-23240.882) [-23262.793] (-23302.952) (-23264.843) \* [-23246.512] (-23263.249) (-23258.255) (-23346.174) -- 7:46:50  
229000 -- (-23250.831) (-23265.383) (-23281.212) (-23285.790) \* [-23244.143] (-23272.843) (-23265.471) (-23348.427) -- 7:46:28  
229500 -- (-23258.446) [-23258.091] (-23273.229) (-23272.134) \* (-23253.572) (-23278.591) [-23255.069] (-23338.848) -- 7:46:09  
230000 -- (-23284.913) (-23281.512) [-23271.515] (-23260.535) \* (-23237.649) (-23280.048) [-23245.410] (-23309.635) -- 7:45:51

Average standard deviation of split frequencies: 0.027583

230500 -- (-23292.326) (-23266.017) (-23262.130) [-23249.545] \* (-23248.110) (-23285.395) [-23255.438] (-23341.306) -- 7:45:32  
231000 -- (-23307.878) (-23267.046) (-23284.294) [-23239.584] \* (-23267.423) (-23292.862) [-23251.325] (-23362.563) -- 7:45:10  
231500 -- (-23302.092) (-23275.014) (-23282.739) [-23242.117] \* (-23272.205) (-23265.548) [-23235.670] (-23359.496) -- 7:44:48  
232000 -- (-23320.327) (-23284.043) (-23293.492) [-23224.748] \* (-23256.263) (-23274.258) [-23239.164] (-23369.387) -- 7:44:26  
232500 -- (-23327.959) (-23269.515) (-23293.449) [-23242.627] \* (-23251.818) (-23271.162) [-23251.613] (-23383.514) -- 7:44:04  
233000 -- (-23334.107) (-23253.948) (-23294.384) [-23258.945] \* (-23259.493) (-23258.148) [-23249.335] (-23381.367) -- 7:43:39  
233500 -- (-23299.844) (-23265.320) (-23290.310) [-23273.472] \* (-23250.673) (-23285.637) [-23253.581] (-23372.755) -- 7:43:14  
234000 -- (-23292.434) (-23263.376) (-23279.672) [-23255.062] \* (-23254.567) (-23314.571) [-23259.471] (-23372.011) -- 7:42:49  
234500 -- (-23295.655) (-23269.808) (-23307.850) [-23249.648] \* (-23265.107) (-23297.501) (-23242.210) (-23364.139) -- 7:42:27  
235000 -- (-23299.766) [-23266.163] (-23317.255) (-23269.732) \* (-23262.497) (-23287.982) [-23236.592] (-23376.075) -- 7:42:02

Average standard deviation of split frequencies: 0.027048

235500 -- (-23304.550) (-23256.982) (-23312.562) [-23256.039] \* (-23275.469) (-23293.027) [-23238.198] (-23376.985) -- 7:41:40  
236000 -- (-23308.833) [-23256.359] (-23290.939) (-23284.942) \* (-23291.632) (-23285.323) (-23248.589) (-23370.593) -- 7:41:18  
236500 -- (-23318.134) [-23253.282] (-23294.474) [-23259.364] \* (-23308.418) (-23281.178) [-23257.051] (-23347.523) -- 7:40:57  
237000 -- (-23330.874) (-23244.993) (-23319.139) [-23263.455] \* (-23306.922) (-23283.164) [-23238.708] (-23341.756) -- 7:40:35  
237500 -- (-23329.312) (-23262.768) (-23299.136) [-23266.635] \* (-23301.131) (-23274.851) [-23245.658] (-23336.840) -- 7:40:16  
238000 -- (-23322.979) (-23259.806) (-23291.600) [-23264.044] \* (-23302.237) (-23264.023) [-23227.492] (-23318.425) -- 7:39:58  
238500 -- (-23308.717) (-23273.989) (-23285.400) [-23253.288] \* (-23292.276) (-23254.011) [-23226.141] (-23341.386) -- 7:39:40  
239000 -- (-23313.954) (-23287.286) (-23303.671) [-23245.538] \* (-23273.626) (-23263.204) [-23228.606] (-23356.923) -- 7:39:18  
239500 -- (-23317.905) (-23284.270) (-23311.899) [-23248.677] \* (-23254.633) (-23270.603) [-23216.486] (-23363.000) -- 7:38:56  
240000 -- (-23317.083) (-23284.233) (-23321.956) [-23252.419] \* (-23278.114) (-23285.432) [-23222.178] (-23370.696) -- 7:38:35

Average standard deviation of split frequencies: 0.026440

240500 -- (-23309.462) (-23275.844) (-23304.545) [-23249.828] \* (-23258.113) (-23284.922) [-23233.318] (-23366.784) -- 7:38:16  
241000 -- (-23326.472) [-23264.859] (-23326.975) (-23246.016) \* [-23240.095] (-23290.281) (-23236.745) (-23372.585) -- 7:37:55  
241500 -- (-23329.814) (-23256.982) (-23319.329) [-23255.033] \* [-23245.431] (-23303.939) (-23250.101) (-23349.027) -- 7:37:33  
242000 -- (-23317.813) (-23256.993) (-23316.492) [-23255.138] \* [-23245.147] (-23309.742) (-23260.086) (-23362.325) -- 7:37:12  
242500 -- (-23295.102) (-23245.457) (-23313.113) [-23246.106] \* [-23247.577] (-23301.668) [-23250.957] (-23360.520) -- 7:36:47  
243000 -- (-23307.437) (-23242.914) (-23316.658) [-23244.042] \* [-23228.906] (-23287.423) (-23264.905) (-23355.047) -- 7:36:25  
243500 -- (-23288.619) (-23259.244) (-23297.087) [-23233.536] \* [-23225.627] (-23298.517) (-23261.527) (-23360.033) -- 7:36:04  
244000 -- (-23277.557) (-23245.586) (-23292.529) [-23227.488] \* [-23231.585] (-23285.869) (-23271.918) (-23350.834) -- 7:35:39  
244500 -- (-23258.064) (-23249.399) (-23284.340) [-23236.292] \* [-23239.524] (-23291.819) (-23289.768) (-23350.309) -- 7:35:18  
245000 -- (-23278.418) [-23249.507] (-23294.340) (-23231.620) \* [-23229.891] (-23273.800) (-23288.460) (-23357.106) -- 7:34:54

Average standard deviation of split frequencies: 0.025972

245500 -- (-23298.852) (-23271.662) (-23286.045) [-23228.656] \* [-23222.794] (-23284.849) (-23288.764) (-23349.119) -- 7:34:32  
246000 -- (-23288.284) (-23272.206) (-23311.747) [-23228.581] \* [-23225.459] (-23284.392) (-23287.883) (-23347.886) -- 7:34:14  
246500 -- (-23302.473) (-23289.668) (-23318.675) [-23227.666] \* [-23227.981] (-23284.262) (-23283.615) (-23343.940) -- 7:33:52  
247000 -- (-23293.042) (-23299.238) (-23335.942) [-23214.359] \* [-23223.171] (-23264.093) (-23280.928) (-23346.623) -- 7:33:31  
247500 -- (-23293.669) (-23296.168) (-23319.321) [-23223.886] \* [-23236.003] (-23267.323) (-23303.649) (-23337.394) -- 7:33:10  
248000 -- (-23292.679) (-23297.306) (-23319.913) [-23220.959] \* [-23231.270] (-23260.246) (-23291.715) (-23334.643) -- 7:32:49  
248500 -- (-23281.913) (-23287.627) (-23325.498) [-23226.550] \* [-23240.165] (-23281.268) (-23303.820) (-23341.307) -- 7:32:27  
249000 -- (-23296.412) (-23266.700) (-23328.717) [-23221.904] \* [-23250.626] (-23271.415) (-23298.501) (-23351.728) -- 7:32:06  
249500 -- (-23293.498) (-23273.610) (-23321.518) [-23234.224] \* [-23258.395] (-23263.710) (-23302.291) (-23353.344) -- 7:31:48  
250000 -- (-23287.617) (-23283.883) (-23332.841) [-23249.950] \* (-23269.980) (-23261.494) (-23292.301) (-23346.477) -- 7:31:27

Average standard deviation of split frequencies: 0.025613

250500 -- (-23262.979) (-23292.267) (-23346.828) [-23268.867] \* [-23269.456] (-23267.120) (-23286.845) (-23372.094) -- 7:31:08  
251000 -- (-23269.225) (-23285.565) (-23322.208) (-23268.640) \* [-23265.075] (-23266.786) (-23292.625) (-23367.140) -- 7:30:47  
251500 -- (-23262.089) (-23273.646) (-23326.817) (-23255.442) \* [-23250.896] (-23272.523) (-23282.216) (-23351.966) -- 7:30:26  
252000 -- (-23247.404) (-23286.723) (-23322.068) [-23243.863] \* [-23237.375] (-23271.581) (-23291.023) (-23327.159) -- 7:30:05  
252500 -- (-23258.122) (-23279.912) (-23312.378) [-23242.375] \* [-23272.162] (-23254.603) (-23289.402) (-23332.939) -- 7:29:41  
253000 -- (-23258.542) (-23287.488) (-23311.733) [-23239.366] \* (-23265.242) (-23246.590) (-23280.526) (-23324.573) -- 7:29:19  
253500 -- (-23265.411) (-23289.683) (-23318.187) [-23249.379] \* (-23252.958) (-23248.775) (-23277.181) (-23315.108) -- 7:28:55  
254000 -- (-23286.764) (-23267.698) (-23308.963) [-23233.420] \* (-23244.885) (-23248.061) (-23270.674) (-23350.108) -- 7:28:31  
254500 -- (-23280.050) (-23269.616) (-23314.631) [-23227.377] \* (-23255.428) (-23238.618) (-23278.043) (-23345.500) -- 7:28:10  
255000 -- (-23259.398) (-23260.461) (-23313.345) [-23242.125] \* (-23279.457) (-23238.269) (-23279.122) (-23370.162) -- 7:27:49

Average standard deviation of split frequencies: 0.025166

255500 -- (-23268.581) (-23268.213) (-23311.169) [-23242.687] \* (-23280.353) [-23230.007] (-23278.455) (-23387.993) -- 7:27:28  
256000 -- (-23267.259) [-23266.897] (-23280.441) [-23238.967] \* (-23276.679) (-23242.449) (-23285.460) (-23376.257) -- 7:27:07  
256500 -- (-23276.749) [-23276.644] (-23271.528) (-23243.370) \* (-23268.516) (-23239.276) (-23285.036) (-23346.660) -- 7:26:49  
257000 -- (-23272.754) (-23275.805) (-23295.081) [-23237.776] \* (-23272.789) (-23235.481) (-23269.267) (-23366.929) -- 7:26:28  
257500 -- (-23273.322) (-23276.583) (-23322.106) [-23233.630] \* (-23274.584) (-23230.811) (-23267.692) (-23370.200) -- 7:26:10  
258000 -- (-23283.106) (-23272.425) (-23315.685) [-23230.739] \* (-23272.058) (-23227.414) (-23305.451) (-23374.016) -- 7:25:49  
258500 -- (-23297.188) (-23247.977) (-23321.376) [-23234.278] \* (-23272.333) (-23221.695) (-23295.161) (-23341.849) -- 7:25:28  
259000 -- (-23278.939) (-23249.973) (-23335.257) [-23228.612] \* (-23271.694) (-23236.112) (-23289.177) (-23357.370) -- 7:25:07  
259500 -- (-23269.583) (-23264.668) (-23343.646) [-23224.772] \* (-23259.990) (-23243.701) (-23282.350) (-23361.739) -- 7:24:49  
260000 -- (-23270.540) (-23285.079) (-23329.888) [-23233.792] \* [-23246.800] (-23255.666) (-23279.303) (-23366.431) -- 7:24:28

Average standard deviation of split frequencies: 0.024710

260500 -- (-23298.780) (-23294.504) (-23326.879) [-23218.060] \* [-23249.481] (-23255.397) (-23280.531) (-23367.852) -- 7:24:07  
261000 -- (-23323.673) (-23284.788) (-23313.872) [-23225.060] \* [-23248.790] (-23274.207) (-23283.040) (-23366.702) -- 7:23:49  
261500 -- (-23314.902) (-23280.611) (-23287.505) [-23233.821] \* [-23251.902] (-23264.393) (-23294.447) (-23374.368) -- 7:23:28  
262000 -- (-23327.098) (-23260.127) (-23298.113) [-23235.259] \* (-23250.927) (-23258.018) (-23285.646) (-23384.273) -- 7:23:07  
262500 -- (-23304.575) (-23277.996) (-23308.782) [-23226.608] \* (-23254.586) (-23263.986) (-23287.205) (-23389.370) -- 7:22:44  
263000 -- (-23308.856) (-23260.944) (-23311.696) [-23225.622] \* (-23254.780) (-23258.393) (-23299.413) (-23406.051) -- 7:22:23  
263500 -- (-23305.832) (-23276.835) (-23320.216) [-23224.652] \* [-23237.446] (-23264.841) (-23315.011) (-23390.243) -- 7:22:05  
264000 -- (-23313.216) (-23271.785) (-23309.184) [-23237.824] \* [-23251.907] (-23257.790) (-23299.836) (-23361.605) -- 7:21:44  
264500 -- (-23320.325) (-23274.354) (-23312.722) [-23236.256] \* [-23249.456] (-23279.540) (-23310.951) (-23376.322) -- 7:21:26  
265000 -- (-23340.264) (-23298.680) (-23288.426) [-23249.291] \* [-23251.532] (-23286.112) (-23286.824) (-23375.932) -- 7:21:05

Average standard deviation of split frequencies: 0.024451

265500 -- (-23327.924) (-23304.433) (-23291.584) [-23252.061] \* [-23260.073] (-23302.324) (-23306.189) (-23382.933) -- 7:20:44  
266000 -- (-23318.125) (-23287.940) (-23295.679) [-23253.300] \* [-23276.401] (-23288.028) (-23308.842) (-23361.893) -- 7:20:23  
266500 -- (-23309.996) (-23297.993) (-23308.176) [-23269.191] \* (-23265.078) (-23287.925) (-23292.815) (-23362.419) -- 7:20:03  
267000 -- (-23314.211) (-23288.314) (-23306.656) [-23248.729] \* [-23261.940] (-23307.748) (-23286.191) (-23346.233) -- 7:19:42  
267500 -- (-23312.466) (-23298.471) (-23306.656) [-23251.069] \* (-23247.671) (-23281.512) (-23254.692) (-23327.739) -- 7:19:21  
268000 -- (-23317.633) (-23313.785) (-23300.533) [-23247.349] \* (-23251.307) (-23283.783) (-23243.621) (-23334.534) -- 7:19:01  
268500 -- (-23307.476) (-23277.470) (-23295.117) [-23231.614] \* (-23257.520) (-23281.376) (-23246.967) (-23324.824) -- 7:18:43  
269000 -- (-23315.729) (-23289.943) (-23304.788) [-23236.947] \* (-23256.793) (-23293.017) (-23252.232) (-23346.023) -- 7:18:22  
269500 -- (-23316.481) (-23271.451) (-23326.762) [-23232.849] \* (-23276.085) (-23277.793) (-23248.784) (-23339.201) -- 7:18:01  
270000 -- (-23319.863) (-23285.498) (-23333.774) [-23223.910] \* [-23268.237] (-23282.536) (-23252.193) (-23362.575) -- 7:17:41

Average standard deviation of split frequencies: 0.025076

|        |    |              |              |              |              |   |              |              |              |              |    |         |
|--------|----|--------------|--------------|--------------|--------------|---|--------------|--------------|--------------|--------------|----|---------|
| 270500 | -- | (-23314.085) | (-23270.446) | (-23323.843) | [-23240.305] | * | (-23276.538) | (-23284.050) | [-23263.726] | (-23360.616) | -- | 7:17:20 |
| 271000 | -- | (-23305.821) | (-23267.278) | (-23332.070) | [-23230.542] | * | (-23296.104) | (-23288.899) | [-23245.870] | (-23377.971) | -- | 7:16:59 |
| 271500 | -- | (-23305.230) | (-23265.942) | (-23329.303) | [-23222.434] | * | (-23276.362) | (-23297.321) | [-23245.112] | (-23366.198) | -- | 7:16:41 |
| 272000 | -- | (-23284.345) | (-23279.285) | (-23349.171) | [-23208.387] | * | (-23265.737) | (-23315.984) | [-23250.633] | (-23370.775) | -- | 7:16:21 |
| 272500 | -- | (-23266.291) | (-23261.838) | (-23342.268) | [-23228.791] | * | (-23261.454) | (-23324.420) | [-23259.584] | (-23386.067) | -- | 7:16:00 |
| 273000 | -- | (-23272.414) | (-23287.379) | (-23350.762) | [-23219.767] | * | (-23265.035) | (-23307.894) | [-23245.048] | (-23385.626) | -- | 7:15:42 |
| 273500 | -- | (-23281.631) | (-23279.653) | (-23350.147) | [-23224.932] | * | (-23266.154) | (-23297.148) | [-23244.787] | (-23372.507) | -- | 7:15:24 |
| 274000 | -- | (-23281.342) | (-23275.455) | (-23348.137) | [-23228.079] | * | (-23256.910) | (-23292.033) | [-23259.498] | (-23374.248) | -- | 7:15:06 |
| 274500 | -- | (-23275.321) | (-23269.191) | (-23328.533) | [-23237.908] | * | (-23273.540) | (-23289.641) | [-23254.489] | (-23359.555) | -- | 7:14:48 |
| 275000 | -- | (-23270.078) | (-23289.313) | (-23345.176) | [-23245.060] | * | (-23266.809) | (-23308.880) | [-23245.483] | (-23376.849) | -- | 7:14:31 |

Average standard deviation of split frequencies: 0.025270

|        |    |              |              |              |              |   |              |              |              |              |    |         |
|--------|----|--------------|--------------|--------------|--------------|---|--------------|--------------|--------------|--------------|----|---------|
| 275500 | -- | (-23263.594) | (-23299.060) | (-23325.677) | [-23223.258] | * | (-23259.316) | (-23307.478) | [-23244.951] | (-23383.764) | -- | 7:14:10 |
| 276000 | -- | (-23279.218) | (-23301.580) | (-23341.456) | [-23216.954] | * | (-23268.970) | (-23299.686) | [-23247.000] | (-23383.410) | -- | 7:13:52 |
| 276500 | -- | (-23284.253) | (-23289.838) | (-23320.659) | [-23213.612] | * | (-23256.460) | (-23304.658) | [-23264.688] | (-23366.366) | -- | 7:13:31 |
| 277000 | -- | (-23273.467) | (-23288.573) | (-23324.869) | [-23234.871] | * | (-23266.527) | (-23298.021) | [-23273.952] | (-23380.989) | -- | 7:13:11 |
| 277500 | -- | (-23281.937) | (-23295.809) | (-23308.936) | [-23235.468] | * | (-23257.717) | (-23293.234) | [-23264.888] | (-23380.416) | -- | 7:12:50 |
| 278000 | -- | (-23274.398) | (-23300.961) | (-23304.627) | [-23242.939] | * | (-23258.692) | (-23281.440) | [-23279.455] | (-23397.847) | -- | 7:12:30 |
| 278500 | -- | (-23266.717) | (-23317.443) | (-23309.403) | [-23248.959] | * | (-23241.497) | (-23284.167) | [-23281.266] | (-23403.154) | -- | 7:12:09 |
| 279000 | -- | (-23267.333) | (-23316.405) | (-23298.709) | [-23253.775] | * | (-23238.883) | (-23270.361) | [-23281.950] | (-23395.853) | -- | 7:11:49 |
| 279500 | -- | (-23255.219) | (-23314.017) | (-23296.229) | [-23240.825] | * | (-23239.500) | (-23276.201) | [-23272.760] | (-23392.772) | -- | 7:11:29 |
| 280000 | -- | (-23262.946) | (-23305.948) | (-23326.692) | [-23244.770] | * | (-23239.111) | (-23255.808) | [-23264.256] | (-23388.726) | -- | 7:11:11 |

Average standard deviation of split frequencies: 0.025156

|        |    |              |              |              |              |   |              |              |              |              |    |         |
|--------|----|--------------|--------------|--------------|--------------|---|--------------|--------------|--------------|--------------|----|---------|
| 280500 | -- | (-23272.619) | (-23306.950) | (-23287.703) | [-23246.757] | * | (-23229.473) | (-23266.458) | [-23255.970] | (-23361.598) | -- | 7:10:50 |
| 281000 | -- | (-23296.454) | (-23297.895) | (-23280.896) | [-23250.822] | * | (-23251.688) | (-23287.529) | [-23243.852] | (-23364.209) | -- | 7:10:32 |
| 281500 | -- | (-23287.803) | (-23298.106) | (-23280.231) | [-23257.314] | * | (-23262.081) | (-23286.126) | [-23240.990] | (-23369.666) | -- | 7:10:12 |
| 282000 | -- | (-23274.984) | (-23291.217) | (-23287.406) | [-23243.290] | * | (-23265.032) | (-23269.891) | [-23233.825] | (-23360.001) | -- | 7:09:54 |
| 282500 | -- | (-23272.048) | (-23317.659) | (-23294.270) | [-23242.969] | * | (-23266.709) | (-23277.547) | [-23235.946] | (-23364.310) | -- | 7:09:34 |
| 283000 | -- | (-23266.347) | (-23322.260) | (-23288.686) | [-23250.880] | * | (-23260.317) | (-23257.898) | [-23240.463] | (-23358.576) | -- | 7:09:16 |
| 283500 | -- | (-23263.022) | (-23321.294) | (-23315.502) | [-23254.572] | * | (-23247.243) | (-23264.402) | [-23227.367] | (-23345.783) | -- | 7:08:55 |
| 284000 | -- | (-23274.483) | (-23310.848) | (-23294.439) | [-23248.978] | * | (-23243.331) | (-23273.243) | [-23221.246] | (-23360.416) | -- | 7:08:38 |
| 284500 | -- | (-23269.356) | (-23291.399) | (-23288.659) | [-23244.671] | * | (-23260.496) | (-23272.253) | [-23210.005] | (-23366.104) | -- | 7:08:17 |
| 285000 | -- | (-23279.023) | (-23290.942) | (-23295.572) | [-23242.855] | * | (-23259.634) | (-23265.914) | [-23218.072] | (-23338.278) | -- | 7:07:59 |

Average standard deviation of split frequencies: 0.025231

|        |    |              |              |              |              |   |              |              |              |              |    |         |
|--------|----|--------------|--------------|--------------|--------------|---|--------------|--------------|--------------|--------------|----|---------|
| 285500 | -- | (-23283.187) | (-23304.157) | (-23279.113) | [-23253.731] | * | (-23265.151) | (-23265.977) | [-23233.362] | (-23350.593) | -- | 7:07:41 |
| 286000 | -- | (-23289.686) | (-23328.205) | (-23299.264) | [-23253.331] | * | (-23269.516) | (-23241.576) | [-23242.728] | (-23354.017) | -- | 7:07:21 |
| 286500 | -- | (-23281.494) | (-23328.317) | (-23307.578) | [-23246.766] | * | (-23292.804) | (-23248.694) | [-23231.902] | (-23337.747) | -- | 7:07:03 |
| 287000 | -- | (-23270.885) | (-23312.446) | (-23310.893) | [-23250.756] | * | (-23296.352) | (-23235.038) | [-23224.660] | (-23358.159) | -- | 7:06:45 |
| 287500 | -- | (-23273.732) | (-23327.853) | (-23306.308) | [-23251.564] | * | (-23300.077) | (-23234.656) | [-23254.542] | (-23354.357) | -- | 7:06:28 |
| 288000 | -- | (-23267.082) | (-23338.866) | (-23299.626) | [-23254.929] | * | (-23319.620) | (-23246.362) | [-23239.463] | (-23369.743) | -- | 7:06:07 |
| 288500 | -- | (-23261.671) | (-23324.144) | (-23285.797) | [-23248.313] | * | (-23319.715) | (-23256.339) | [-23234.039] | (-23336.807) | -- | 7:05:47 |
| 289000 | -- | (-23250.252) | (-23343.902) | (-23292.800) | [-23241.328] | * | (-23307.909) | (-23245.841) | [-23238.814] | (-23335.433) | -- | 7:05:29 |
| 289500 | -- | (-23246.914) | (-23338.195) | (-23282.788) | [-23232.861] | * | (-23299.668) | (-23242.648) | [-23230.227] | (-23342.398) | -- | 7:05:09 |
| 290000 | -- | (-23262.039) | (-23343.277) | (-23285.180) | [-23254.170] | * | (-23293.820) | (-23264.134) | [-23244.299] | (-23362.488) | -- | 7:04:51 |

Average standard deviation of split frequencies: 0.025019

|        |    |              |              |              |              |   |              |              |              |              |    |         |
|--------|----|--------------|--------------|--------------|--------------|---|--------------|--------------|--------------|--------------|----|---------|
| 290500 | -- | (-23258.425) | (-23327.549) | (-23283.724) | [-23273.470] | * | (-23287.362) | (-23280.455) | [-23237.239] | (-23368.110) | -- | 7:04:33 |
| 291000 | -- | (-23252.301) | (-23325.628) | (-23278.876) | [-23252.027] | * | (-23278.245) | (-23286.064) | [-23236.308] | (-23354.875) | -- | 7:04:13 |
| 291500 | -- | (-23266.242) | (-23298.497) | (-23264.219) | [-23239.679] | * | (-23278.346) | (-23280.239) | [-23238.587] | (-23363.052) | -- | 7:03:55 |
| 292000 | -- | (-23283.618) | (-23294.306) | (-23249.847) | [-23248.805] | * | (-23260.857) | (-23276.953) | [-23243.123] | (-23353.231) | -- | 7:03:37 |
| 292500 | -- | (-23295.132) | (-23302.485) | (-23254.105) | [-23251.155] | * | (-23260.210) | (-23279.902) | [-23241.190] | (-23345.967) | -- | 7:03:19 |
| 293000 | -- | (-23305.520) | (-23326.586) | (-23265.017) | [-23229.154] | * | (-23240.041) | (-23280.375) | [-23238.025] | (-23334.757) | -- | 7:03:02 |
| 293500 | -- | (-23314.891) | (-23305.945) | (-23285.270) | [-23230.820] | * | (-23242.076) | (-23278.949) | [-23257.596] | (-23340.435) | -- | 7:02:41 |
| 294000 | -- | (-23307.671) | (-23304.955) | (-23284.502) | [-23229.012] | * | (-23244.109) | (-23273.872) | [-23235.487] | (-23321.389) | -- | 7:02:23 |
| 294500 | -- | (-23304.273) | (-23285.609) | (-23265.136) | [-23226.782] | * | (-23259.661) | (-23273.171) | [-23232.995] | (-23315.554) | -- | 7:02:03 |
| 295000 | -- | (-23322.747) | (-23283.313) | (-23261.955) | [-23237.883] | * | (-23234.607) | (-23269.498) | [-23231.551] | (-23314.390) | -- | 7:01:45 |

Average standard deviation of split frequencies: 0.025004

|        |    |              |              |              |              |   |              |              |              |              |    |         |
|--------|----|--------------|--------------|--------------|--------------|---|--------------|--------------|--------------|--------------|----|---------|
| 295500 | -- | (-23338.746) | (-23270.511) | (-23265.396) | [-23247.683] | * | (-23238.811) | (-23268.998) | [-23241.501] | (-23322.531) | -- | 7:01:25 |
| 296000 | -- | (-23334.525) | (-23282.965) | (-23263.626) | [-23241.011] | * | (-23252.065) | (-23291.772) | [-23222.035] | (-23308.495) | -- | 7:01:07 |
| 296500 | -- | (-23323.121) | (-23283.053) | (-23282.731) | [-23244.077] | * | (-23274.405) | (-23278.641) | [-23237.918] | (-23322.504) | -- | 7:00:50 |
| 297000 | -- | (-23322.541) | (-23289.863) | (-23274.970) | [-23247.619] | * | (-23266.287) | (-23273.713) | [-23233.678] | (-23333.832) | -- | 7:00:32 |
| 297500 | -- | (-23322.654) | (-23280.592) | (-23268.040) | [-23237.474] | * | (-23256.751) | (-23266.370) | [-23236.645] | (-23339.676) | -- | 7:00:12 |
| 298000 | -- | (-23327.470) | (-23271.671) | (-23273.708) | [-23240.876] | * | (-23265.972) | (-23290.195) | [-23223.824] | (-23326.097) | -- | 6:59:49 |
| 298500 | -- | (-23329.141) | (-23257.063) | (-23264.335) | [-23238.048] | * | (-23288.369) | (-23279.616) | [-23244.774] | (-23337.699) | -- | 6:59:27 |
| 299000 | -- | (-23313.031) | (-23253.814) | (-23274.340) | [-23228.947] | * | (-23287.072) | (-23263.763) | [-23252.774] | (-23327.767) | -- | 6:59:06 |
| 299500 | -- | (-23300.310) | (-23267.658) | (-23268.036) | [-23238.470] | * | (-23280.591) | (-23272.214) | [-23242.781] | (-23344.765) | -- | 6:58:44 |
| 300000 | -- | (-23294.981) | (-23292.396) | (-23280.180) | [-23240.817] | * | (-23280.882) | (-23259.664) | [-23254.748] | (-23343.884) | -- | 6:58:24 |

Average standard deviation of split frequencies: 0.025086

|        |    |              |              |              |              |   |              |              |              |              |    |         |
|--------|----|--------------|--------------|--------------|--------------|---|--------------|--------------|--------------|--------------|----|---------|
| 300500 | -- | (-23303.014) | (-23300.233) | (-23273.295) | [-23245.117] | * | (-23277.067) | (-23249.325) | [-23256.867] | (-23356.282) | -- | 6:58:01 |
| 301000 | -- | (-23317.421) | (-23307.639) | (-23272.163) | [-23248.414] | * | (-23276.386) | (-23262.055) | [-23253.769] | (-23329.370) | -- | 6:57:41 |
| 301500 | -- | (-23285.213) | (-23322.051) | (-23279.653) | [-23249.573] | * | (-23295.650) | (-23263.685) | [-23243.538] | (-23324.544) | -- | 6:57:19 |
| 302000 | -- | (-23284.738) | (-23318.186) | (-23281.397) | [-23244.538] | * | (-23291.979) | (-23268.700) | [-23242.466] | (-23307.164) | -- | 6:56:59 |
| 302500 | -- | (-23269.998) | (-23296.928) | (-23276.857) | [-23248.358] | * | (-23303.172) | (-23268.055) | [-23222.642] | (-23302.784) | -- | 6:56:39 |
| 303000 | -- | (-23252.228) | (-23335.964) | (-23287.065) | [-23251.976] | * | (-23281.074) | (-23277.981) | [-23238.339] | (-23298.887) | -- | 6:56:19 |
| 303500 | -- | (-23262.694) | (-23303.271) | (-23278.603) | [-23263.678] | * | (-23286.910) | (-23267.655) | [-23254.802] | (-23304.950) | -- | 6:55:59 |
| 304000 | -- | (-23242.356) | (-23288.667) | (-23290.438) | [-23261.875] | * | (-23274.334) | (-23257.266) | [-23252.722] | (-23295.324) | -- | 6:55:41 |
| 304500 | -- | (-23237.746) | (-23271.337) | (-23295.928) | [-23240.955] | * | (-23268.281) | (-23267.789) | [-23251.612] | (-23319.290) | -- | 6:55:23 |
| 305000 | -- | (-23241.834) | (-23267.891) | (-23310.669) | [-23249.314] | * | (-23254.222) | (-23281.198) | [-23245.408] | (-23324.808) | -- | 6:55:06 |

Average standard deviation of split frequencies: 0.024528

|        |    |              |              |              |              |   |              |              |              |              |    |         |
|--------|----|--------------|--------------|--------------|--------------|---|--------------|--------------|--------------|--------------|----|---------|
| 305500 | -- | (-23259.308) | (-23265.675) | (-23295.892) | [-23255.856] | * | (-23258.997) | (-23287.937) | [-23241.727] | (-23326.361) | -- | 6:54:46 |
| 306000 | -- | (-23257.139) | (-23263.440) | (-23318.266) | [-23251.426] | * | (-23238.170) | (-23285.211) | [-23241.523] | (-23304.430) | -- | 6:54:26 |
| 306500 | -- | (-23255.588) | (-23263.770) | (-23292.478) | [-23260.532] | * | (-23249.459) | (-23282.454) | [-23247.663] | (-23295.169) | -- | 6:54:08 |
| 30     |    |              |              |              |              |   |              |              |              |              |    |         |

311000 -- (-23265.431) (-23345.172) (-23296.378) [-23265.379] \* (-23262.120) (-23316.176) [-23241.952] (-23288.536) -- 6:51:26  
311500 -- (-23264.066) (-23334.335) (-23303.763) (-23248.037) \* (-23276.720) (-23285.678) [-23256.320] (-23286.113) -- 6:51:06  
312000 -- (-23263.146) (-23319.419) (-23293.160) [-23248.026] \* (-23286.048) (-23309.872) [-23257.059] (-23290.122) -- 6:50:48  
312500 -- (-23261.607) (-23310.453) (-23296.548) [-23240.169] \* (-23278.427) (-23301.922) [-23244.489] (-23306.250) -- 6:50:29  
313000 -- (-23255.633) (-23318.370) (-23290.226) [-23235.059] \* (-23281.745) (-23313.142) [-23240.128] (-23311.390) -- 6:50:11  
313500 -- (-23236.871) (-23314.894) (-23285.511) (-23226.987) \* (-23244.239) (-23327.204) [-23246.186] (-23313.820) -- 6:49:51  
314000 -- (-23247.163) (-23301.988) (-23259.809) (-23228.875) \* (-23247.338) (-23313.617) [-23239.212] (-23318.046) -- 6:49:31  
314500 -- (-23243.488) (-23305.185) (-23259.401) (-23240.244) \* [-23229.864] (-23303.169) (-23252.135) (-23308.794) -- 6:49:13  
315000 -- (-23262.796) (-23300.425) [-23254.934] (-23247.446) \* (-23235.360) (-23304.903) [-23243.673] (-23315.217) -- 6:48:56

Average standard deviation of split frequencies: 0.023645

315500 -- (-23283.678) (-23300.179) [-23256.709] (-23261.603) \* [-23225.211] (-23294.867) (-23272.594) (-23305.202) -- 6:48:36  
316000 -- (-23284.914) (-23296.894) [-23266.851] (-23267.412) \* [-23234.567] (-23327.063) (-23292.391) (-23296.454) -- 6:48:18  
316500 -- (-23257.808) (-23293.035) (-23278.086) (-23283.590) \* [-23232.834] (-23301.092) (-23292.956) (-23293.818) -- 6:48:00  
317000 -- (-23261.887) (-23279.931) [-23261.923] (-23299.484) \* [-23241.543] (-23310.098) (-23278.062) (-23305.191) -- 6:47:40  
317500 -- (-23247.238) (-23295.947) (-23284.125) (-23294.464) \* [-23232.942] (-23340.714) (-23284.590) (-23308.756) -- 6:47:21  
318000 -- (-23256.683) (-23267.517) (-23301.496) (-23309.494) \* [-23236.718] (-23342.975) (-23279.982) (-23310.167) -- 6:47:03  
318500 -- (-23253.086) (-23268.615) (-23294.108) (-23314.027) \* [-23242.655] (-23314.001) (-23268.129) (-23312.896) -- 6:46:43  
319000 -- (-23251.353) (-23263.926) (-23286.613) (-23316.026) \* (-23244.038) (-23319.722) (-23264.364) (-23286.075) -- 6:46:23  
319500 -- (-23236.941) (-23268.582) (-23268.047) (-23296.316) \* (-23260.317) (-23304.992) [-23266.187] (-23277.660) -- 6:46:03  
320000 -- (-23248.461) (-23269.392) (-23277.256) (-23339.354) \* [-23248.616] (-23284.489) (-23266.815) (-23282.394) -- 6:45:44

Average standard deviation of split frequencies: 0.023042

320500 -- (-23229.023) (-23271.226) (-23273.518) (-23330.996) \* (-23248.154) (-23282.665) [-23252.927] (-23316.699) -- 6:45:24  
321000 -- (-23243.014) (-23274.569) [-23267.030] (-23318.083) \* (-23257.655) (-23295.149) (-23251.261) (-23328.953) -- 6:45:06  
321500 -- (-23248.460) (-23282.253) (-23290.243) (-23306.198) \* (-23263.644) (-23278.281) [-23254.375] (-23347.824) -- 6:44:46  
322000 -- (-23242.276) (-23268.707) (-23271.018) (-23304.652) \* (-23280.026) (-23282.553) [-23245.403] (-23331.250) -- 6:44:26  
322500 -- (-23234.086) (-23268.643) (-23274.078) (-23302.205) \* (-23277.192) (-23283.760) [-23231.894] (-23328.525) -- 6:44:05  
323000 -- (-23235.882) (-23276.897) (-23289.928) (-23301.490) \* (-23277.016) (-23284.266) [-23234.437] (-23303.657) -- 6:43:47  
323500 -- (-23244.922) (-23270.761) (-23282.645) (-23306.125) \* (-23301.343) (-23270.446) [-23234.889] (-23338.923) -- 6:43:27  
324000 -- (-23260.138) (-23263.212) (-23260.797) (-23331.331) \* (-23313.292) (-23275.725) [-23237.307] (-23338.192) -- 6:43:09  
324500 -- (-23249.451) (-23262.470) (-23271.774) (-23314.167) \* (-23329.206) (-23262.252) [-23231.771] (-23335.001) -- 6:42:50  
325000 -- (-23269.153) [-23253.411] (-23259.316) (-23317.409) \* (-23319.610) (-23274.337) [-23235.202] (-23325.966) -- 6:42:30

Average standard deviation of split frequencies: 0.022564

325500 -- (-23271.326) (-23262.350) [-23251.402] (-23327.306) \* (-23312.924) (-23241.083) [-23221.419] (-23323.013) -- 6:42:10  
326000 -- (-23270.749) (-23267.075) [-23239.901] (-23308.874) \* (-23292.555) (-23263.628) [-23229.531] (-23307.908) -- 6:41:51  
326500 -- (-23273.511) (-23301.776) [-23228.825] (-23306.637) \* (-23283.458) (-23272.929) [-23244.650] (-23310.695) -- 6:41:33  
327000 -- (-23247.967) (-23317.100) [-23216.976] (-23286.823) \* (-23272.921) (-23281.780) [-23245.436] (-23323.244) -- 6:41:13  
327500 -- (-23256.918) (-23327.586) [-23216.541] (-23298.374) \* (-23278.834) (-23289.392) [-23237.036] (-23302.377) -- 6:40:53  
328000 -- (-23248.283) (-23330.743) [-23223.985] (-23302.447) \* (-23284.356) (-23299.898) [-23219.440] (-23305.652) -- 6:40:36  
328500 -- (-23275.540) (-23336.636) [-23216.481] (-23301.701) \* (-23288.756) (-23327.703) [-23219.578] (-23297.110) -- 6:40:16  
329000 -- (-23279.735) (-23313.265) [-23208.413] (-23309.329) \* (-23286.785) (-23324.277) [-23224.359] (-23272.438) -- 6:39:58  
329500 -- (-23283.470) (-23310.864) [-23197.855] (-23323.533) \* (-23282.077) (-23325.914) [-23226.969] (-23265.591) -- 6:39:39  
330000 -- (-23285.704) (-23309.649) [-23214.513] (-23326.976) \* (-23295.299) (-23334.959) [-23226.938] (-23258.941) -- 6:39:19

Average standard deviation of split frequencies: 0.022211

330500 -- (-23282.852) (-23304.091) [-23225.155] (-23304.549) \* (-23290.416) (-23340.705) [-23218.326] (-23273.898) -- 6:38:59  
331000 -- (-23268.995) (-23301.549) [-23227.928] (-23295.909) \* (-23297.179) (-23355.338) [-23232.090] (-23272.508) -- 6:38:38  
331500 -- (-23260.674) (-23319.603) [-23229.506] (-23307.811) \* (-23290.219) (-23360.775) [-23220.250] (-23266.712) -- 6:38:20  
332000 -- (-23257.630) (-23330.046) [-23246.354] (-23298.023) \* (-23299.639) (-23353.936) [-23229.841] (-23267.222) -- 6:38:00  
332500 -- (-23253.072) (-23330.439) (-23260.267) (-23299.781) \* (-23295.219) (-23329.302) [-23235.550] (-23288.602) -- 6:37:43  
333000 -- (-23264.136) (-23323.839) [-23256.430] (-23303.463) \* (-23284.977) (-23352.702) [-23230.457] (-23302.074) -- 6:37:25  
333500 -- (-23264.770) (-23328.504) [-23260.408] (-23319.555) \* (-23281.045) (-23358.122) [-23239.921] (-23294.116) -- 6:37:10  
334000 -- (-23258.836) (-23339.352) (-23247.765) (-23317.892) \* (-23270.156) (-23339.428) [-23246.246] (-23275.832) -- 6:36:52  
334500 -- (-23242.215) (-23306.845) (-23255.770) (-23310.670) \* (-23287.846) (-23317.895) [-23243.163] (-23268.342) -- 6:36:34  
335000 -- (-23261.670) (-23312.546) [-23265.660] (-23318.926) \* (-23273.462) (-23311.698) [-23232.342] (-23258.842) -- 6:36:17

Average standard deviation of split frequencies: 0.021903

335500 -- (-23259.167) (-23311.217) (-23285.822) (-23325.738) \* (-23264.997) (-23318.195) [-23234.260] (-23266.755) -- 6:35:59  
336000 -- (-23251.876) (-23316.643) [-23265.938] (-23338.653) \* [-23264.423] (-23309.745) (-23242.303) (-23277.877) -- 6:35:41  
336500 -- (-23246.262) (-23286.255) (-23269.064) (-23341.077) \* (-23267.372) (-23292.499) [-23237.175] (-23266.242) -- 6:35:24  
337000 -- (-23222.138) (-23283.225) (-23282.257) (-23321.998) \* (-23284.145) (-23283.557) [-23238.245] (-23280.550) -- 6:35:04  
337500 -- (-23238.765) (-23278.643) (-23270.945) (-23324.048) \* (-23262.039) (-23322.601) [-23242.869] (-23276.649) -- 6:34:47  
338000 -- (-23234.471) (-23273.659) (-23263.123) (-23318.514) \* (-23265.129) (-23329.116) [-23243.945] (-23291.945) -- 6:34:29  
338500 -- (-23246.432) (-23279.953) (-23251.075) (-23313.323) \* [-23263.524] (-23329.426) (-23238.494) (-23246.927) -- 6:34:11  
339000 -- (-23250.325) (-23280.094) (-23247.277) (-23310.865) \* (-23238.006) (-23332.880) [-23229.148] (-23258.005) -- 6:33:54  
339500 -- (-23226.275) (-23299.980) (-23246.727) (-23312.585) \* [-23244.769] (-23331.749) (-23240.855) (-23265.853) -- 6:33:36  
340000 -- (-23236.116) (-23298.236) (-23252.102) (-23315.262) \* (-23264.351) (-23317.409) [-23243.089] (-23278.355) -- 6:33:18

Average standard deviation of split frequencies: 0.022445

340500 -- (-23241.099) (-23312.062) (-23247.311) (-23296.893) \* [-23256.874] (-23308.768) (-23252.553) (-23277.403) -- 6:33:01  
341000 -- (-23252.990) (-23318.322) [-23241.413] (-23288.416) \* [-23253.127] (-23305.447) (-23253.793) (-23264.557) -- 6:32:45  
341500 -- (-23243.541) (-23311.497) (-23243.037) (-23286.642) \* (-23287.586) (-23311.265) (-23250.982) (-23259.314) -- 6:32:29  
342000 -- (-23229.444) (-23329.737) (-23263.625) (-23297.563) \* (-23289.939) (-23312.936) (-23251.813) (-23266.256) -- 6:32:14  
342500 -- (-23243.291) (-23315.825) (-23247.569) (-23293.300) \* (-23297.338) (-23301.238) [-23239.835] (-23295.367) -- 6:31:56  
343000 -- (-23254.796) (-23303.878) (-23248.828) (-23293.767) \* (-23318.462) (-23287.084) [-23259.383] (-23280.222) -- 6:31:40  
343500 -- (-23259.717) (-23301.182) (-23247.079) (-23312.826) \* (-23324.298) (-23288.134) [-23270.688] (-23263.681) -- 6:31:23  
344000 -- (-23245.218) (-23305.270) (-23242.659) (-23275.649) \* (-23329.421) (-23274.309) [-23277.639] (-23260.288) -- 6:31:07  
344500 -- (-23251.957) (-23288.542) (-23250.206) (-23290.467) \* (-23322.254) (-23278.416) (-23282.756) [-23261.042] -- 6:30:49  
345000 -- (-23263.130) (-23270.918) (-23256.821) (-23272.697) \* (-23304.001) (-23297.622) (-23271.954) [-23242.216] -- 6:30:31

Average standard deviation of split frequencies: 0.022433

345500 -- (-23257.260) (-23279.371) [-23262.994] (-23306.739) \* (-23291.004) (-23338.682) [-23275.152] (-23247.799) -- 6:30:14  
346000 -- (-23261.568) (-23291.328) [-23234.636] (-23301.960) \* (-23290.326) (-23331.771) (-23294.371) [-23236.506] -- 6:29:56  
346500 -- (-23262.746) (-23273.542) (-23247.361) (-23298.752) \* (-23300.670) (-23339.140) (-23282.506) [-23243.009] -- 6:29:37  
347000 -- (-23274.704) (-23291.289) [-23243.375] (-23289.312) \* (-23290.327) (-23331.736) (-23287.244) [-23243.335] -- 6:29:21  
347500 -- (-23277.338) (-23275.138) (-23246.728) (-23291.347) \* (-23256.682) (-23349.231) (-23299.183) [-23250.840] -- 6:29:03  
348000 -- (-23273.487) (-23253.936) (-23230.802) (-23300.074) \* [-23264.575] (-23347.728) (-23289.426) (-23255.991) -- 6:28:45  
348500 -- (-23253.490) (-23249.642) (-23242.236) (-23301.022) \* (-23277.898) (-23326.672) (-23291.301) [-23252.496] -- 6:28:30  
349000 -- (-23270.519) (-23245.063) (-23241.755) (-23303.412) \* [-23247.861] (-23322.653) (-23297.958) [-23259.890] -- 6:28:12  
349500 -- (-23252.762) (-23229.947) [-23237.567] (-23291.994) \* (-23258.257) (-23320.867) (-23279.731) [-23247.926] -- 6:27:56  
350000 -- (-23263.584) [-23243.534] (-23251.794) (-23295.311) \* (-23270.649) (-23314.249) (-23290.033) [-23247.686] -- 6:27:40

Average standard deviation of split frequencies: 0.022362

350500 -- (-23276.971) [-23241.322] (-23248.267) (-23330.088) \* (-23270.375) (-23307.510) (-23269.220) [-23231.508] -- 6:27:24  
351000 -- (-23265.560) (-23252.284) (-23243.803) (-23314.089) \* (-23266.205) (-23322.701) (-23255.486) [-23221.371] -- 6:27:09  
351500 -- (-23275.734) [-23248.766] (-23248.044) (-23289.200) \* (-23249.725) (-23320.690) (-23275.117) [-23234.147] -- 6:26:53  
352000 -- (-23263.154) [-23242.120] (-23265.037) (-23278.530) \* (-23255.290) (-23290.417) (-23262.785) [-23234.802] -- 6:26:35  
352500 -- (-23257.644) [-23242.664] (-23263.199) (-23266.918) \* (-23249.771) (-23299.531) (-23253.789) [-23226.832] -- 6:26:17

353000 -- (-23262.160) [-23251.708] (-23251.007) (-23281.265) \* (-23250.671) (-23293.330) (-23257.774) [-23219.938] -- 6:26:00  
353500 -- (-23249.307) (-23241.694) [-23244.178] (-23259.870) \* (-23251.587) (-23323.404) (-23250.360) [-23249.864] -- 6:25:44  
354000 -- (-23271.426) (-23241.104) [-23245.306] (-23263.924) \* [-23262.641] (-23333.178) (-23267.197) (-23254.983) -- 6:25:28  
354500 -- (-23262.190) (-23252.341) [-23244.948] (-23265.006) \* (-23261.866) (-23313.953) (-23257.795) [-23250.891] -- 6:25:12  
355000 -- (-23273.727) (-23269.566) [-23244.066] (-23266.371) \* (-23266.851) (-23310.004) (-23273.934) [-23233.364] -- 6:24:56

Average standard deviation of split frequencies: 0.021580

355500 -- (-23279.500) [-23252.364] (-23245.435) (-23280.431) \* (-23253.969) (-23326.052) (-23278.154) [-23243.404] -- 6:24:40  
356000 -- (-23279.955) (-23240.458) [-23268.481] (-23286.001) \* (-23269.275) (-23328.477) (-23275.915) [-23249.527] -- 6:24:24  
356500 -- (-23273.147) [-23227.592] (-23266.584) (-23290.085) \* (-23247.688) (-23306.446) (-23277.421) [-23245.712] -- 6:24:08  
357000 -- (-23265.100) (-23248.585) [-23261.773] (-23293.671) \* (-23246.996) (-23301.586) (-23271.331) [-23266.609] -- 6:23:50  
357500 -- (-23279.233) (-23248.273) [-23245.913] (-23293.563) \* [-23233.801] (-23326.727) (-23272.489) [-23267.518] -- 6:23:34  
358000 -- (-23282.012) [-23237.206] (-23253.702) (-23286.474) \* (-23255.276) (-23334.987) [-23262.527] (-23260.245) -- 6:23:17  
358500 -- (-23271.189) [-23224.694] (-23253.169) (-23282.361) \* (-23257.671) (-23341.937) [-23250.530] [-23264.973] -- 6:23:01  
359000 -- (-23266.156) [-23242.717] (-23256.598) (-23281.206) \* (-23247.221) (-23336.411) (-23254.502) [-23249.415] -- 6:22:43  
359500 -- (-23274.604) (-23249.848) [-23256.435] (-23278.702) \* [-23248.731] (-23323.967) (-23253.145) (-23262.629) -- 6:22:29  
360000 -- (-23291.234) [-23261.477] (-23268.180) (-23286.505) \* [-23248.955] (-23318.791) (-23279.578) (-23281.903) -- 6:22:11

Average standard deviation of split frequencies: 0.021402

360500 -- (-23278.138) [-23253.863] (-23257.577) (-23291.777) \* [-23251.898] (-23312.434) (-23293.270) (-23281.257) -- 6:21:55  
361000 -- (-23283.481) (-23252.739) [-23265.497] (-23299.331) \* [-23253.217] (-23298.227) (-23300.161) (-23273.753) -- 6:21:37  
361500 -- (-23296.594) (-23238.320) [-23252.781] (-23299.975) \* (-23251.855) (-23306.630) [-23276.878] (-23289.192) -- 6:21:20  
362000 -- (-23304.070) [-23222.174] (-23229.120) (-23301.690) \* (-23262.744) (-23319.504) [-23269.025] (-23279.302) -- 6:21:02  
362500 -- (-23298.196) [-23214.507] (-23228.803) (-23312.819) \* [-23271.566] (-23333.160) (-23259.203) [-23276.277] -- 6:20:44  
363000 -- (-23274.538) [-23239.905] (-23242.974) (-23299.857) \* [-23270.175] (-23299.396) (-23253.613) (-23295.412) -- 6:20:26  
363500 -- (-23266.005) (-23233.442) [-23260.318] (-23313.701) \* (-23273.860) (-23283.403) [-23254.149] (-23304.646) -- 6:20:05  
364000 -- (-23273.940) [-23227.829] (-23249.116) (-23307.294) \* (-23273.209) (-23273.784) [-23258.231] (-23298.124) -- 6:19:47  
364500 -- (-23291.641) (-23228.243) [-23251.417] (-23311.472) \* (-23268.801) (-23267.963) [-23251.039] (-23290.714) -- 6:19:28  
365000 -- (-23284.212) [-23215.743] (-23275.336) (-23306.450) \* [-23256.221] (-23302.325) (-23266.426) (-23317.150) -- 6:19:06

Average standard deviation of split frequencies: 0.021194

365500 -- (-23306.479) [-23227.830] (-23278.654) (-23316.441) \* (-23264.433) (-23284.484) [-23247.609] (-23307.113) -- 6:18:49  
366000 -- (-23299.585) [-23226.498] (-23261.692) (-23288.816) \* (-23263.634) (-23280.449) [-23248.289] (-23295.483) -- 6:18:29  
366500 -- (-23299.842) [-23220.276] (-23260.086) (-23288.072) \* (-23260.388) (-23292.693) [-23247.101] (-23279.895) -- 6:18:10  
367000 -- (-23298.138) [-23227.106] (-23283.660) (-23273.596) \* (-23257.403) (-23297.796) [-23252.850] (-23286.168) -- 6:17:52  
367500 -- (-23297.450) [-23237.447] (-23294.432) (-23271.269) \* (-23256.960) (-23307.672) (-23247.063) (-23270.488) -- 6:17:32  
368000 -- (-23295.522) [-23232.138] (-23290.216) (-23271.888) \* (-23266.074) (-23290.442) [-23235.792] (-23269.124) -- 6:17:15  
368500 -- (-23285.453) (-23250.231) [-23305.979] (-23267.549) \* (-23286.190) (-23320.720) (-23240.667) [-23253.256] -- 6:16:57  
369000 -- (-23294.953) (-23249.583) [-23315.267] (-23268.726) \* (-23264.111) (-23309.101) (-23244.582) [-23232.909] -- 6:16:39  
369500 -- (-23294.552) [-23232.972] (-23304.000) (-23264.129) \* (-23252.626) (-23313.733) (-23273.674) [-23230.742] -- 6:16:21  
370000 -- (-23321.380) [-23230.483] (-23299.494) (-23266.570) \* (-23266.189) (-23329.078) (-23279.240) [-23248.301] -- 6:16:02

Average standard deviation of split frequencies: 0.021353

370500 -- (-23313.674) [-23238.175] (-23306.067) (-23269.624) \* [-23280.322] (-23320.783) (-23259.457) (-23245.764) -- 6:15:44  
371000 -- (-23311.998) [-23245.613] (-23303.528) (-23262.106) \* (-23284.183) (-23298.285) (-23279.731) [-23233.280] -- 6:15:27  
371500 -- (-23327.458) (-23242.596) (-23296.469) [-23237.008] \* (-23289.780) (-23295.140) [-23269.563] (-23238.837) -- 6:15:10  
372000 -- (-23341.984) (-23236.068) (-23292.271) [-23257.812] \* (-23279.630) (-23310.726) (-23255.992) [-23237.353] -- 6:14:53  
372500 -- (-23305.884) [-23242.231] (-23294.673) (-23238.128) \* (-23304.404) (-23291.905) (-23244.842) [-23229.593] -- 6:14:37  
373000 -- (-23320.016) (-23245.893) (-23297.607) [-23242.971] \* (-23301.138) (-23290.240) (-23275.017) [-23227.137] -- 6:14:19  
373500 -- (-23336.604) [-23229.135] (-23303.797) (-23256.226) \* (-23281.427) (-23306.371) (-23286.378) [-23234.529] -- 6:14:03  
374000 -- (-23326.465) [-23228.242] (-23291.643) (-23251.638) \* (-23298.131) (-23312.573) (-23280.226) [-23222.117] -- 6:13:47  
374500 -- (-23324.096) [-23221.638] (-23298.600) (-23253.871) \* (-23286.618) (-23308.534) (-23302.761) [-23226.367] -- 6:13:31  
375000 -- (-23318.114) [-23232.789] (-23294.828) (-23252.915) \* (-23274.880) (-23319.527) (-23306.351) [-23220.742] -- 6:13:15

Average standard deviation of split frequencies: 0.021234

375500 -- (-23301.704) [-23224.590] (-23296.057) (-23253.506) \* (-23278.137) (-23291.443) (-23283.284) [-23226.930] -- 6:13:00  
376000 -- (-23281.507) [-23233.346] (-23332.583) (-23246.693) \* (-23269.384) (-23309.626) (-23289.623) [-23225.622] -- 6:12:44  
376500 -- (-23273.526) (-23234.627) (-23350.861) [-23252.799] \* (-23279.491) (-23294.035) (-23288.074) [-23228.326] -- 6:12:28  
377000 -- (-23284.633) (-23251.267) (-23348.925) [-23237.802] \* (-23265.965) (-23292.201) (-23284.100) [-23234.927] -- 6:12:13  
377500 -- (-23297.783) (-23261.452) (-23349.631) [-23240.499] \* (-23259.619) (-23277.045) (-23269.260) [-23227.369] -- 6:11:57  
378000 -- (-23286.553) (-23261.199) (-23297.824) [-23232.029] \* (-23247.911) (-23284.487) (-23302.201) (-23254.084) -- 6:11:41  
378500 -- (-23272.935) (-23267.784) (-23291.460) [-23228.226] \* (-23241.504) (-23280.180) (-23307.431) (-23256.525) -- 6:11:23  
379000 -- (-23278.459) (-23257.025) (-23294.748) [-23235.174] \* (-23240.909) (-23299.290) (-23309.104) (-23265.509) -- 6:11:07  
379500 -- (-23275.112) (-23268.439) (-23291.660) [-23249.135] \* (-23242.888) (-23311.865) (-23300.567) (-23276.140) -- 6:10:49  
380000 -- (-23279.295) (-23277.952) (-23300.375) [-23261.849] \* (-23236.003) (-23310.337) (-23297.604) [-23269.124] -- 6:10:31

Average standard deviation of split frequencies: 0.021618

380500 -- (-23281.035) (-23262.114) (-23269.956) [-23244.394] \* [-23235.387] (-23324.257) (-23298.025) (-23264.753) -- 6:10:15  
381000 -- (-23279.178) (-23268.933) (-23276.349) [-23235.595] \* [-23231.310] (-23282.382) (-23320.517) (-23273.248) -- 6:09:57  
381500 -- (-23286.848) (-23273.228) (-23280.375) [-23238.377] \* [-23236.634] (-23260.497) (-23304.280) (-23289.048) -- 6:09:40  
382000 -- (-23285.300) (-23287.194) (-23266.542) [-23231.205] \* [-23233.380] (-23254.284) (-23301.529) (-23282.524) -- 6:09:22  
382500 -- (-23289.532) (-23271.231) (-23263.528) [-23222.594] \* [-23226.339] (-23256.741) (-23327.901) (-23289.357) -- 6:09:06  
383000 -- (-23306.296) (-23269.770) (-23241.207) [-23234.015] \* [-23221.653] (-23254.437) (-23331.620) (-23288.388) -- 6:08:46  
383500 -- (-23324.244) (-23265.654) (-23246.090) [-23222.949] \* (-23240.421) (-23243.580) (-23311.536) (-23284.172) -- 6:08:28  
384000 -- (-23310.597) (-23264.468) (-23236.941) [-23221.725] \* [-23235.389] (-23241.108) (-23283.857) (-23278.071) -- 6:08:10  
384500 -- (-23313.662) (-23273.420) (-23263.884) [-23246.804] \* (-23257.521) (-23254.816) (-23325.408) (-23281.887) -- 6:07:53  
385000 -- (-23300.427) (-23267.406) (-23265.151) [-23259.636] \* (-23273.954) (-23266.557) (-23318.159) [-23272.985] -- 6:07:33

Average standard deviation of split frequencies: 0.021512

385500 -- (-23290.671) (-23263.753) (-23270.132) [-23243.732] \* (-23278.657) [-23246.379] (-23315.327) (-23253.182) -- 6:07:17  
386000 -- (-23308.309) [-23239.959] (-23286.174) [-23234.869] \* (-23298.296) (-23240.794) (-23332.032) [-23260.648] -- 6:06:59  
386500 -- (-23297.609) [-23231.206] (-23282.165) [-23253.910] \* (-23277.181) (-23236.565) (-23325.150) (-23267.052) -- 6:06:41  
387000 -- (-23290.552) [-23236.625] (-23282.075) (-23260.609) \* (-23296.035) [-23238.909] (-23339.666) (-23257.401) -- 6:06:25  
387500 -- (-23311.297) [-23231.296] (-23278.556) (-23257.178) \* (-23279.698) [-23251.006] (-23331.648) (-23263.262) -- 6:06:06  
388000 -- (-23303.827) [-23225.640] (-23275.366) (-23245.096) \* (-23290.993) [-23251.885] (-23326.730) (-23265.412) -- 6:05:48  
388500 -- (-23308.548) (-23236.410) (-23280.979) [-23224.321] \* (-23308.674) (-23250.730) (-23314.963) (-23258.623) -- 6:05:30  
389000 -- (-23305.530) (-23230.457) (-23272.969) [-23232.370] \* (-23321.777) (-23251.737) (-23295.218) (-23267.683) -- 6:05:12  
389500 -- (-23302.394) (-23235.237) (-23266.008) [-23220.044] \* (-23316.975) (-23246.702) (-23288.218) (-23295.521) -- 6:04:53  
390000 -- (-23318.407) (-23224.221) (-23276.264) [-23228.455] \* (-23317.088) [-23235.045] (-23275.365) (-23305.133) -- 6:04:35

Average standard deviation of split frequencies: 0.021287

390500 -- (-23321.064) (-23241.362) (-23285.818) [-23236.591] \* (-23323.802) [-23219.041] (-23275.746) (-23299.382) -- 6:04:16  
391000 -- (-23283.806) (-23243.965) (-23280.886) [-23256.754] \* (-23334.049) [-23211.666] (-23269.035) (-23289.781) -- 6:03:58  
391500 -- (-23279.983) [-23238.382] (-23288.770) (-23270.487) \* (-23305.919) [-23227.735] (-23253.667) (-23295.060) -- 6:03:40  
392000 -- (-23294.891) [-23227.697] (-23280.590) (-23282.702) \* (-23337.418) [-23244.508] (-23269.948) (-23298.995) -- 6:03:21  
392500 -- (-23308.911) [-23256.574] (-23291.547) (-23269.968) \* (-23336.665) [-23254.198] (-23278.483) (-23265.014) -- 6:03:03  
393000 -- (-23336.838) [-23271.321] (-23297.441) (-23306.204) \* (-23311.274) [-23259.379] (-23295.820) (-23259.031) -- 6:02:43  
393500 -- (-23364.275) (-23260.990) (-23300.144) (-23281.726) \* (-23316.346) (-23272.994) (-23293.474) [-23248.467] -- 6:02:24  
394000 -- (-23346.975) [-23241.713] (-23275.309) (-23279.713) \* (-23315.237) (-23279.697) (-23267.600) [-23242.489] -- 6:02:05  
394500 -- (-23352.264) [-23236.536] (-23275.990) (-23280.908) \* (-23306.627) (-23287.885) (-23272.201) [-23248.202] -- 6:01:45

395000 -- (-23335.485) [-23238.141] (-23294.878) (-23273.522) \* (-23292.716) (-23273.772) (-23266.747) [-23239.792] -- 6:01:26

Average standard deviation of split frequencies: 0.021004

395500 -- (-23329.444) [-23249.187] (-23265.120) (-23275.866) \* (-23271.417) [-23253.357] (-23270.591) (-23240.763) -- 6:01:08  
396000 -- (-23318.031) [-23250.083] [-23257.856] (-23283.484) \* (-23270.903) (-23272.056) (-23267.631) [-23253.035] -- 6:00:49  
396500 -- (-23310.176) [-23261.700] [-23273.104] (-23287.297) \* (-23259.135) (-23273.516) (-23276.847) [-23265.376] -- 6:00:31  
397000 -- (-23293.807) [-23255.111] (-23268.238) (-23289.821) \* (-23263.754) (-23278.440) (-23269.317) [-23238.904] -- 6:00:12  
397500 -- (-23315.706) [-23268.957] (-23276.025) (-23260.166) \* (-23263.731) (-23283.328) (-23286.975) [-23244.061] -- 5:59:52  
398000 -- (-23305.259) (-23287.063) [-23260.704] (-23284.543) \* (-23249.713) (-23264.357) (-23290.165) (-23260.725) -- 5:59:33  
398500 -- (-23305.802) (-23288.434) (-23263.457) [-23282.709] \* (-23260.709) (-23277.327) (-23270.441) [-23269.194] -- 5:59:14  
399000 -- (-23320.056) (-23295.524) [-23264.229] (-23263.058) \* [-23246.791] (-23290.241) (-23273.168) (-23269.250) -- 5:58:56  
399500 -- (-23314.912) (-23295.567) (-23266.668) [-23251.046] \* (-23253.990) (-23275.499) (-23274.018) (-23273.370) -- 5:58:37  
400000 -- (-23315.889) (-23295.073) [-23267.520] (-23255.061) \* [-23259.999] (-23298.360) (-23272.470) (-23274.108) -- 5:58:19

Average standard deviation of split frequencies: 0.020896

400500 -- (-23296.453) (-23289.771) (-23269.553) [-23239.975] \* [-23249.954] (-23297.181) (-23254.392) (-23271.429) -- 5:58:00  
401000 -- (-23293.673) (-23290.530) (-23282.708) [-23250.831] \* [-23259.328] (-23304.608) (-23273.722) (-23267.574) -- 5:57:42  
401500 -- (-23279.449) (-23301.226) (-23318.118) [-23248.725] \* [-23246.337] (-23284.384) (-23269.570) (-23257.582) -- 5:57:24  
402000 -- (-23267.978) (-23308.123) (-23302.534) [-23231.007] \* (-23246.367) (-23276.536) [-23255.235] (-23268.130) -- 5:57:05  
402500 -- (-23245.376) (-23312.728) (-23297.563) [-23235.990] \* [-23243.575] (-23279.871) (-23250.857) (-23286.920) -- 5:56:47  
403000 -- (-23261.527) (-23313.520) (-23305.976) [-23239.375] \* [-23234.715] (-23329.313) (-23255.709) (-23300.530) -- 5:56:28  
403500 -- (-23268.202) (-23308.071) (-23295.406) [-23216.121] \* [-23264.518] (-23305.397) (-23265.609) (-23293.262) -- 5:56:10  
404000 -- (-23269.598) (-23272.605) (-23286.929) [-23221.047] \* [-23220.611] (-23291.750) (-23265.248) (-23291.867) -- 5:55:52  
404500 -- (-23275.537) (-23280.475) (-23285.794) [-23251.074] \* [-23222.856] (-23287.577) (-23241.079) (-23296.679) -- 5:55:33  
405000 -- (-23270.008) (-23298.438) (-23301.347) [-23255.745] \* [-23223.354] (-23277.073) (-23251.900) (-23274.753) -- 5:55:15

Average standard deviation of split frequencies: 0.020473

405500 -- [-23257.872] (-23283.956) (-23297.227) (-23255.214) \* [-23224.985] (-23285.286) (-23275.595) (-23281.215) -- 5:54:57  
406000 -- (-23237.919) (-23275.138) (-23286.780) (-23249.594) \* [-23245.933] (-23285.202) (-23281.043) (-23302.392) -- 5:54:40  
406500 -- (-23235.646) (-23280.966) (-23310.828) (-23268.946) \* [-23245.334] (-23274.349) (-23296.049) (-23328.419) -- 5:54:22  
407000 -- (-23254.803) (-23297.911) (-23297.093) [-23257.632] \* [-23230.761] (-23264.007) (-23299.613) (-23315.298) -- 5:54:03  
407500 -- (-23263.858) (-23313.621) (-23326.165) (-23249.239) \* [-23224.051] (-23245.443) (-23289.594) (-23316.517) -- 5:53:45  
408000 -- [-23240.840] (-23317.635) (-23350.424) (-23263.101) \* [-23231.988] (-23257.482) (-23300.555) (-23294.413) -- 5:53:26  
408500 -- (-23258.315) (-23299.559) (-23372.552) [-23263.713] \* [-23229.088] (-23245.983) (-23298.571) (-23293.872) -- 5:53:08  
409000 -- [-23246.338] (-23305.831) (-23351.785) (-23264.093) \* [-23249.583] (-23264.078) (-23296.061) (-23304.819) -- 5:52:50  
409500 -- (-23253.273) (-23294.677) (-23365.060) [-23256.556] \* [-23250.255] (-23253.847) (-23284.300) (-23295.506) -- 5:52:31  
410000 -- (-23257.077) (-23294.144) (-23345.596) [-23249.945] \* [-23266.938] (-23272.900) (-23284.799) (-23273.499) -- 5:52:12

Average standard deviation of split frequencies: 0.020643

410500 -- (-23257.319) (-23285.533) (-23337.335) [-23255.865] \* [-23261.891] (-23286.466) (-23297.104) (-23306.128) -- 5:51:54  
411000 -- [-23256.295] (-23282.643) (-23302.473) (-23270.720) \* [-23266.175] (-23287.378) (-23288.876) (-23310.585) -- 5:51:35  
411500 -- (-23252.481) (-23281.171) (-23311.699) [-23254.169] \* [-23273.085] (-23280.510) (-23309.246) (-23305.195) -- 5:51:17  
412000 -- [-23262.487] (-23263.522) (-23310.840) (-23265.431) \* [-23274.304] (-23268.722) (-23294.294) (-23317.034) -- 5:50:58  
412500 -- (-23244.692) (-23255.813) (-23337.542) (-23284.167) \* [-23255.213] (-23255.608) (-23286.887) (-23293.304) -- 5:50:39  
413000 -- [-23248.194] (-23256.782) (-23319.825) (-23278.284) \* [-23269.732] (-23246.607) (-23294.641) (-23291.113) -- 5:50:18  
413500 -- [-23246.740] (-23288.580) (-23305.654) (-23291.671) \* (-23267.730) (-23229.433) (-23289.451) (-23279.492) -- 5:50:01  
414000 -- [-23242.673] (-23297.864) (-23309.904) (-23273.617) \* (-23255.774) [-23219.794] (-23296.468) (-23268.982) -- 5:49:44  
414500 -- (-23225.072) (-23291.710) (-23310.603) (-23272.925) \* (-23278.369) [-23222.303] (-23293.195) (-23255.921) -- 5:49:24  
415000 -- [-23237.335] (-23298.726) (-23317.418) (-23275.005) \* (-23284.571) [-23211.756] (-23303.235) (-23241.374) -- 5:49:07

Average standard deviation of split frequencies: 0.020382

415500 -- [-23247.386] (-23281.521) (-23326.111) (-23278.858) \* (-23285.757) [-23233.846] (-23303.442) (-23253.049) -- 5:48:49  
416000 -- (-23230.144) (-23289.024) (-23326.948) (-23302.991) \* (-23287.183) [-23228.855] (-23305.867) (-23238.554) -- 5:48:31  
416500 -- (-23234.304) (-23278.529) (-23305.871) (-23312.856) \* (-23276.598) [-23247.141] (-23306.704) (-23259.298) -- 5:48:13  
417000 -- [-23246.069] (-23257.948) (-23297.417) (-23304.137) \* (-23274.256) [-23248.581] (-23297.989) (-23283.827) -- 5:47:54  
417500 -- (-23255.197) (-23265.125) (-23295.541) (-23297.623) \* (-23278.515) (-23252.004) (-23287.880) (-23282.408) -- 5:47:36  
418000 -- [-23247.864] (-23274.006) (-23273.725) (-23303.984) \* [-23273.624] (-23250.920) (-23300.610) (-23269.793) -- 5:47:17  
418500 -- [-23244.092] (-23278.299) (-23273.959) (-23319.879) \* (-23289.369) (-23228.086) (-23297.558) (-23291.241) -- 5:47:00  
419000 -- [-23239.632] (-23273.692) (-23273.649) (-23307.227) \* [-23282.138] (-23239.683) (-23292.933) (-23288.526) -- 5:46:40  
419500 -- [-23245.877] (-23286.863) (-23259.215) (-23307.918) \* (-23292.542) (-23249.750) (-23304.399) (-23276.794) -- 5:46:23  
420000 -- [-23256.060] (-23284.620) (-23271.738) (-23309.443) \* (-23285.696) [-23239.346] (-23293.421) (-23260.641) -- 5:46:05

Average standard deviation of split frequencies: 0.020556

420500 -- (-23257.724) (-23295.143) [-23269.562] (-23316.124) \* (-23285.324) [-23249.057] (-23285.354) (-23267.708) -- 5:45:46  
421000 -- (-23241.778) (-23319.125) [-23281.473] (-23292.510) \* (-23287.877) [-23235.227] (-23277.543) (-23311.492) -- 5:45:28  
421500 -- (-23231.783) (-23306.255) (-23281.293) (-23281.182) \* (-23280.966) [-23224.208] (-23268.254) (-23309.129) -- 5:45:09  
422000 -- [-23210.899] (-23289.072) (-23285.091) (-23283.398) \* (-23286.980) [-23212.760] (-23281.866) (-23329.331) -- 5:44:51  
422500 -- [-23211.567] (-23289.178) (-23272.796) (-23272.282) \* (-23282.717) [-23213.958] (-23310.197) (-23325.441) -- 5:44:33  
423000 -- [-23215.527] (-23300.580) (-23259.177) (-23283.570) \* (-23277.826) (-23209.659) (-23319.188) (-23302.417) -- 5:44:16  
423500 -- [-23228.343] (-23304.038) (-23251.173) (-23302.495) \* (-23278.965) [-23214.728] (-23315.145) (-23296.191) -- 5:43:58  
424000 -- (-23235.393) (-23309.892) (-23251.153) (-23310.935) \* (-23271.329) (-23225.282) (-23302.694) (-23300.203) -- 5:43:39  
424500 -- [-23250.890] (-23301.806) (-23245.156) (-23306.743) \* (-23272.877) (-23229.078) (-23302.930) (-23303.177) -- 5:43:21  
425000 -- (-23254.362) (-23309.299) [-23242.679] (-23297.471) \* [-23241.584] (-23221.339) (-23298.507) (-23301.576) -- 5:43:03

Average standard deviation of split frequencies: 0.020941

425500 -- (-23283.139) (-23342.859) [-23254.080] (-23303.404) \* (-23245.333) [-23231.144] (-23308.477) (-23309.270) -- 5:42:44  
426000 -- (-23281.315) (-23330.881) [-23257.239] (-23288.516) \* (-23274.005) [-23233.230] (-23320.559) (-23323.535) -- 5:42:26  
426500 -- (-23257.321) (-23331.124) [-23248.744] (-23281.826) \* (-23276.710) [-23235.007] (-23330.105) (-23309.061) -- 5:42:09  
427000 -- (-23258.609) (-23310.215) (-23261.773) (-23291.325) \* (-23283.300) [-23244.843] (-23328.956) (-23307.080) -- 5:41:51  
427500 -- (-23245.968) (-23301.401) [-23257.740] (-23267.813) \* (-23267.675) (-23239.155) (-23328.582) (-23305.156) -- 5:41:32  
428000 -- (-23236.410) (-23302.101) (-23258.807) (-23289.587) \* (-23273.169) (-23233.583) (-23324.389) (-23317.637) -- 5:41:13  
428500 -- (-23268.027) (-23310.383) (-23259.104) (-23290.748) \* (-23278.395) (-23238.945) (-23319.961) (-23332.996) -- 5:40:53  
429000 -- (-23272.699) (-23300.022) (-23256.893) (-23303.532) \* (-23281.992) (-23248.327) (-23331.070) (-23330.464) -- 5:40:36  
429500 -- (-23294.505) (-23319.311) (-23260.028) (-23323.708) \* (-23250.274) (-23231.280) (-23327.498) (-23316.743) -- 5:40:17  
430000 -- (-23294.478) (-23315.654) [-23243.133] (-23294.159) \* [-23239.363] (-23222.548) (-23317.405) (-23322.458) -- 5:39:58

Average standard deviation of split frequencies: 0.021086

430500 -- (-23302.831) (-23317.389) [-23224.428] (-23286.168) \* [-23245.042] (-23255.881) (-23320.863) (-23302.466) -- 5:39:38  
431000 -- (-23310.026) (-23296.678) [-23235.504] (-23276.523) \* (-23232.250) (-23269.743) (-23323.287) (-23302.791) -- 5:39:19  
431500 -- (-23303.096) (-23296.259) [-23243.031] (-23267.608) \* [-23244.364] (-23256.326) (-23322.292) (-23309.171) -- 5:39:00  
432000 -- (-23282.852) (-23321.293) (-23258.686) (-23271.916) \* (-23237.086) (-23249.744) (-23310.332) (-23285.259) -- 5:38:43  
432500 -- (-23267.612) (-23304.159) (-23240.682) (-23263.003) \* [-23248.503] (-23244.580) (-23296.129) (-23310.303) -- 5:38:24  
433000 -- (-23274.201) (-23312.398) [-23231.963] (-23302.026) \* [-23238.587] (-23258.302) (-23293.620) (-23343.520) -- 5:38:06  
433500 -- (-23289.875) (-23322.598) [-23231.660] (-23285.947) \* [-23229.594] (-23250.635) (-23284.837) (-23338.940) -- 5:37:47  
434000 -- (-23274.440) (-23301.467) (-23233.454) (-23265.219) \* [-23222.131] (-23262.004) (-23283.090) (-23323.836) -- 5:37:29  
434500 -- (-23266.019) (-23286.915) [-23252.792] (-23279.022) \* (-23228.203) (-23253.464) (-23281.270) (-23334.382) -- 5:37:11  
435000 -- (-23276.193) (-23292.231) [-23264.401] (-23270.122) \* (-23237.421) (-23275.047) (-23330.022) -- 5:36:54

Average standard deviation of split frequencies: 0.021091

435500 -- (-23284.034) (-23299.306) [-23246.094] (-23286.079) \* (-23249.136) [-23235.654] (-23280.391) (-23305.295) -- 5:36:34  
436000 -- (-23295.015) (-23288.553) [-23246.449] (-23272.311) \* (-23244.809) [-23227.588] (-23268.300) (-23325.112) -- 5:36:17  
436500 -- (-23302.278) (-23308.161) [-23251.600] (-23283.390) \* (-23255.003) [-23237.516] (-23267.345) (-23318.875) -- 5:35:59  
437000 -- (-23298.090) (-23318.858) [-23272.623] (-23273.291) \* (-23242.892) [-23230.132] (-23269.467) (-23310.574) -- 5:35:41  
437500 -- [-23282.182] (-23322.690) (-23278.174) (-23266.009) \* [-23237.005] (-23246.530) (-23269.937) (-23315.092) -- 5:35:25  
438000 -- (-23301.842) (-23342.843) [-23266.993] (-23253.989) \* [-23235.832] (-23237.511) (-23258.070) (-23311.542) -- 5:35:07  
438500 -- (-23280.834) (-23333.291) [-23265.262] (-23250.139) \* (-23247.520) (-23238.317) (-23259.298) (-23311.525) -- 5:34:51  
439000 -- (-23283.141) (-23333.004) [-23266.976] [-23247.651] \* (-23261.354) [-23235.633] (-23255.909) (-23333.471) -- 5:34:33  
439500 -- (-23272.775) (-23348.054) (-23283.904) [-23239.140] \* (-23273.346) [-23218.233] (-23275.513) (-23329.087) -- 5:34:15  
440000 -- (-23269.531) (-23352.602) (-23290.764) [-23237.396] \* (-23274.467) [-23233.488] (-23263.455) (-23312.550) -- 5:33:59

Average standard deviation of split frequencies: 0.021140

440500 -- (-23298.925) (-23338.312) (-23288.481) [-23242.535] \* (-23280.705) [-23233.918] (-23260.505) (-23297.018) -- 5:33:41  
441000 -- (-23308.822) (-23337.747) (-23275.165) [-23227.755] \* (-23285.978) [-23225.095] (-23286.062) (-23304.207) -- 5:33:24  
441500 -- (-23316.298) (-23319.759) (-23265.816) [-23238.814] \* (-23265.157) [-23231.991] (-23280.604) (-23312.987) -- 5:33:07  
442000 -- (-23297.053) (-23298.675) [-23267.593] (-23243.102) \* (-23264.226) [-23240.427] (-23294.084) (-23331.602) -- 5:32:49  
442500 -- (-23273.283) (-23320.214) [-23257.987] [-23256.946] \* (-23259.131) [-23244.221] (-23304.965) (-23318.424) -- 5:32:31  
443000 -- (-23300.134) (-23302.973) [-23261.826] (-23261.655) \* (-23253.185) [-23243.086] (-23295.279) (-23312.521) -- 5:32:13  
443500 -- (-23284.919) (-23301.569) [-23248.888] (-23258.988) \* (-23246.801) [-23234.792] (-23294.121) (-23310.643) -- 5:31:56  
444000 -- (-23288.957) (-23321.959) [-23245.075] (-23265.539) \* (-23257.950) [-23231.775] (-23305.128) (-23321.913) -- 5:31:37  
444500 -- (-23284.338) (-23328.776) [-23249.543] (-23248.092) \* (-23254.897) [-23237.202] (-23299.898) (-23305.517) -- 5:31:18  
445000 -- (-23303.291) (-23324.977) (-23258.491) [-23247.297] \* (-23261.267) [-23241.248] (-23299.972) (-23298.305) -- 5:31:00

Average standard deviation of split frequencies: 0.021227

445500 -- (-23318.740) (-23322.607) (-23266.175) [-23259.031] \* [-23272.495] (-23245.749) (-23303.526) (-23301.478) -- 5:30:41  
446000 -- (-23303.909) (-23323.889) [-23259.223] (-23268.319) \* [-23281.797] (-23246.253) (-23311.538) (-23306.731) -- 5:30:23  
446500 -- (-23310.247) (-23335.701) [-23262.320] (-23279.659) \* (-23294.529) [-23251.957] (-23307.426) (-23292.934) -- 5:30:04  
447000 -- (-23290.220) (-23346.399) [-23253.115] (-23277.673) \* (-23275.659) [-23248.606] (-23284.150) (-23273.001) -- 5:29:46  
447500 -- (-23273.713) (-23335.855) [-23230.386] (-23293.666) \* (-23283.477) [-23252.172] (-23302.187) (-23277.839) -- 5:29:29  
448000 -- (-23260.205) (-23302.175) [-23232.714] (-23310.360) \* (-23280.000) [-23248.873] (-23301.338) (-23260.271) -- 5:29:10  
448500 -- (-23271.886) (-23300.594) [-23230.932] (-23309.012) \* (-23287.427) [-23236.587] (-23327.144) (-23267.086) -- 5:28:51  
449000 -- (-23270.562) (-23305.624) [-23243.309] (-23305.437) \* (-23300.638) [-23248.219] (-23313.699) (-23270.319) -- 5:28:32  
449500 -- (-23255.593) (-23307.001) [-23243.696] (-23307.702) \* (-23294.257) [-23232.243] (-23315.711) (-23275.425) -- 5:28:14  
450000 -- (-23260.952) (-23302.123) [-23232.793] (-23317.708) \* (-23290.574) [-23233.164] (-23305.244) (-23280.745) -- 5:27:55

Average standard deviation of split frequencies: 0.021994

450500 -- (-23272.105) (-23288.028) [-23258.016] (-23320.632) \* (-23310.706) [-23231.305] (-23322.484) (-23267.633) -- 5:27:37  
451000 -- (-23268.448) (-23296.580) [-23269.707] (-23310.813) \* (-23305.536) [-23234.125] (-23317.534) (-23263.770) -- 5:27:18  
451500 -- (-23273.806) (-23281.738) [-23254.277] (-23287.585) \* (-23303.384) [-23253.698] (-23324.925) (-23284.347) -- 5:26:59  
452000 -- (-23261.117) (-23311.831) [-23255.555] (-23299.065) \* (-23296.255) [-23245.332] (-23341.420) (-23284.204) -- 5:26:40  
452500 -- (-23269.658) (-23290.999) [-23253.645] (-23312.351) \* (-23276.411) [-23237.196] (-23329.545) (-23308.582) -- 5:26:22  
453000 -- (-23273.351) (-23293.619) [-23239.303] (-23305.369) \* (-23285.053) [-23252.746] (-23327.895) (-23283.742) -- 5:26:04  
453500 -- (-23271.890) (-23315.698) [-23235.444] (-23269.950) \* (-23295.597) [-23251.872] (-23317.974) (-23275.222) -- 5:25:45  
454000 -- (-23269.802) (-23308.192) [-23248.698] (-23288.753) \* (-23281.080) [-23258.235] (-23310.422) (-23272.725) -- 5:25:26  
454500 -- (-23257.852) (-23297.445) [-23245.342] (-23274.399) \* (-23263.533) [-23273.888] (-23325.973) (-23276.204) -- 5:25:08  
455000 -- (-23263.900) (-23293.527) [-23245.242] (-23286.844) \* (-23254.275) (-23268.312) (-23339.385) (-23261.214) -- 5:24:49

Average standard deviation of split frequencies: 0.022579

455500 -- (-23262.900) (-23319.266) [-23246.456] (-23275.673) \* [-23261.525] (-23269.029) (-23338.365) (-23276.890) -- 5:24:31  
456000 -- (-23258.773) (-23316.868) [-23225.261] (-23307.752) \* [-23244.415] (-23248.783) (-23338.551) (-23274.451) -- 5:24:12  
456500 -- (-23259.320) (-23306.577) [-23245.600] (-23293.511) \* (-23245.102) [-23252.463] (-23328.394) (-23279.164) -- 5:23:53  
457000 -- (-23258.374) (-23299.000) [-23249.765] (-23293.970) \* (-23249.414) [-23238.032] (-23325.076) (-23294.750) -- 5:23:34  
457500 -- (-23263.140) (-23294.084) [-23247.136] (-23290.558) \* (-23249.899) [-23231.162] (-23295.527) (-23283.396) -- 5:23:16  
458000 -- (-23270.297) (-23278.506) [-23234.737] (-23288.176) \* (-23241.549) [-23224.423] (-23295.083) (-23274.358) -- 5:22:57  
458500 -- (-23253.154) (-23300.109) [-23234.712] (-23299.832) \* [-23244.411] (-23231.876) (-23302.655) (-23258.958) -- 5:22:38  
459000 -- (-23256.578) (-23306.238) [-23237.921] (-23293.549) \* (-23273.105) [-23240.962] (-23301.105) (-23275.630) -- 5:22:20  
459500 -- (-23252.333) (-23331.409) [-23247.948] (-23307.771) \* (-23278.636) [-23242.118] (-23286.958) (-23299.834) -- 5:22:02  
460000 -- (-23260.010) (-23310.424) [-23243.464] (-23288.813) \* (-23270.553) [-23235.962] (-23289.499) (-23291.725) -- 5:21:45

Average standard deviation of split frequencies: 0.023255

460500 -- (-23251.468) (-23326.349) [-23237.282] (-23282.834) \* (-23276.019) [-23230.324] (-23285.842) (-23297.451) -- 5:21:28  
461000 -- (-23257.433) (-23338.372) [-23226.364] (-23301.073) \* (-23287.194) [-23217.681] (-23266.645) (-23308.020) -- 5:21:10  
461500 -- (-23264.490) (-23324.464) [-23223.956] (-23328.129) \* (-23276.723) [-23232.541] (-23269.917) (-23295.004) -- 5:20:52  
462000 -- (-23260.399) (-23315.282) [-23226.719] (-23324.272) \* (-23270.293) [-23249.949] (-23266.236) (-23282.652) -- 5:20:34  
462500 -- (-23260.005) (-23313.914) [-23231.033] (-23311.776) \* (-23260.025) [-23241.685] (-23260.746) (-23283.767) -- 5:20:16  
463000 -- (-23267.317) (-23294.547) [-23242.128] (-23299.762) \* (-23278.038) [-23228.842] (-23242.828) (-23295.369) -- 5:19:57  
463500 -- (-23262.161) (-23303.136) [-23242.413] (-23302.934) \* (-23261.292) [-23230.253] (-23251.877) (-23295.401) -- 5:19:39  
464000 -- (-23259.696) (-23309.388) [-23245.332] (-23325.007) \* (-23251.962) [-23236.431] (-23261.882) (-23289.667) -- 5:19:20  
464500 -- (-23253.082) (-23318.056) [-23269.834] (-23294.096) \* [-23243.858] (-23270.222) (-23254.902) (-23291.867) -- 5:19:03  
465000 -- (-23251.501) (-23295.200) (-23287.748) (-23286.129) \* [-23240.772] (-23267.142) (-23257.014) (-23309.992) -- 5:18:44

Average standard deviation of split frequencies: 0.023635

465500 -- (-23244.964) (-23308.391) [-23287.566] (-23276.722) \* (-23245.356) (-23273.325) [-23265.779] (-23315.675) -- 5:18:25  
466000 -- (-23253.777) (-23298.016) [-23298.647] (-23271.034) \* (-23245.580) (-23272.866) (-23258.552) (-23323.997) -- 5:18:07  
466500 -- (-23253.908) (-23302.820) (-23310.468) (-23272.743) \* [-23269.222] (-23268.900) (-23275.660) (-23332.080) -- 5:17:48  
467000 -- [-23245.714] (-23288.813) (-23296.191) (-23282.642) \* [-23244.497] (-23273.496) (-23270.460) (-23335.430) -- 5:17:31  
467500 -- [-23245.899] (-23313.122) (-23288.211) (-23282.929) \* (-23251.295) (-23273.945) (-23265.763) (-23325.030) -- 5:17:13  
468000 -- [-23237.252] (-23328.645) (-23279.048) (-23278.953) \* [-23253.940] (-23289.509) (-23276.388) (-23300.822) -- 5:16:54  
468500 -- [-23239.632] (-23336.572) (-23263.788) (-23288.093) \* [-23256.908] (-23276.326) (-23262.380) (-23302.352) -- 5:16:36  
469000 -- (-23255.619) (-23333.787) [-23265.612] (-23291.374) \* (-23277.168) (-23297.609) [-23246.538] (-23306.055) -- 5:16:17  
469500 -- [-23246.510] (-23309.509) (-23275.863) (-23288.762) \* (-23290.756) (-23285.361) [-23234.575] (-23305.899) -- 5:16:00  
470000 -- (-23256.586) (-23315.178) (-23256.654) (-23282.656) \* (-23301.229) (-23274.101) (-23238.884) (-23319.346) -- 5:15:42

Average standard deviation of split frequencies: 0.023724

470500 -- (-23261.687) (-23329.094) [-23247.623] (-23287.115) \* (-23298.667) [-23241.309] (-23238.469) (-23319.811) -- 5:15:23  
471000 -- (-23260.977) (-23316.130) [-23257.713] (-23283.603) \* (-23291.586) [-23245.966] (-23248.046) (-23325.579) -- 5:15:05  
471500 -- (-23265.958) (-23305.080) [-23250.711] (-23289.358) \* (-23270.540) (-23262.520) [-23232.401] (-23327.789) -- 5:14:48  
472000 -- (-23255.005) (-23322.707) [-23251.782] (-23289.722) \* (-23270.914) (-23252.660) (-23245.136) (-23299.076) -- 5:14:31  
472500 -- (-23251.376) (-23303.203) [-23240.683] (-23293.367) \* [-23256.388] (-23259.187) (-23246.501) (-23311.584) -- 5:14:13  
473000 -- (-23258.796) (-23286.263) [-23237.439] (-23320.543) \* (-23263.264) (-23253.708) (-23240.853) (-23323.233) -- 5:13:56  
473500 -- [-23251.500] (-23290.056) (-23232.084) (-23315.501) \* (-23239.524) (-23262.871) (-23245.354) (-23334.371) -- 5:13:38  
474000 -- (-23256.869) (-23296.842) [-23232.538] (-23326.503) \* (-23250.151) (-23271.035) (-23258.727) (-23327.054) -- 5:13:20  
474500 -- (-23256.709) (-23305.468) (-23268.384) (-23316.726) \* (-23274.129) (-23285.944) (-23247.460) (-23319.595) -- 5:13:02  
475000 -- [-23254.273] (-23285.374) (-23282.666) (-23336.738) \* (-23276.109) (-23301.702) [-23229.081] (-23315.477) -- 5:12:45

Average standard deviation of split frequencies: 0.023614

475500 -- [-23261.760] (-23301.210) (-23260.926) (-23320.463) \* (-23272.952) (-23278.935) [-23233.308] (-23339.241) -- 5:12:27  
476000 -- (-23261.620) (-23306.682) (-23255.984) (-23309.976) \* (-23269.308) (-23304.247) [-23238.853] (-23308.005) -- 5:12:09  
476500 -- (-23274.974) (-23300.329) (-23255.699) (-23334.774) \* (-23257.551) (-23290.458) (-23256.487) (-23305.560) -- 5:11:50  
477000 -- (-23282.812) (-23279.750) [-23242.656] (-23332.582) \* [-23254.303] (-23292.434) (-23255.088) (-23285.020) -- 5:11:33



477500 -- (-23276.119) (-23266.351) [-23237.897] (-23344.060) \* (-23255.759) (-23299.564) [-23243.398] (-23279.253) -- 5:11:15  
478000 -- (-23283.432) (-23303.765) [-23231.272] (-23336.880) \* (-23245.366) (-23297.866) (-23222.534) (-23283.047) -- 5:10:56  
478500 -- (-23280.705) (-23298.181) [-23244.409] (-23330.742) \* [-23238.610] (-23301.392) (-23238.924) (-23283.597) -- 5:10:38  
479000 -- (-23281.435) (-23290.116) [-23240.187] (-23311.909) \* [-23250.157] (-23293.361) (-23247.301) (-23220.333) -- 5:10:21  
479500 -- (-23279.193) (-23293.662) [-23246.996] (-23322.539) \* [-23241.776] (-23279.428) (-23249.620) (-23306.659) -- 5:10:03  
480000 -- (-23276.543) (-23291.053) [-23243.568] (-23292.228) \* [-23227.227] (-23300.240) (-23254.342) (-23304.439) -- 5:09:45

Average standard deviation of split frequencies: 0.023589

480500 -- (-23263.327) (-23276.711) [-23240.340] (-23319.588) \* [-23217.012] (-23287.678) (-23279.164) (-23314.876) -- 5:09:27  
481000 -- (-23276.845) (-23295.034) [-23227.077] (-23332.097) \* [-23213.447] (-23281.644) (-23271.018) (-23316.916) -- 5:09:10  
481500 -- (-23259.915) (-23303.873) [-23244.426] (-23302.916) \* [-23227.099] (-23273.638) (-23275.127) (-23316.644) -- 5:08:52  
482000 -- (-23267.259) (-23300.866) [-23254.438] (-23307.805) \* [-23227.171] (-23260.946) (-23270.453) (-23326.617) -- 5:08:35  
482500 -- (-23262.913) (-23305.760) [-23256.231] (-23329.156) \* [-23225.758] (-23264.123) (-23255.401) (-23340.685) -- 5:08:17  
483000 -- (-23263.021) (-23296.600) [-23269.524] (-23329.659) \* [-23235.925] (-23288.686) (-23251.953) (-23352.679) -- 5:08:00  
483500 -- (-23254.091) (-23294.725) [-23258.527] (-23318.955) \* [-23244.132] (-23285.541) (-23256.146) (-23352.578) -- 5:07:41  
484000 -- (-23238.674) (-23293.386) [-23262.623] (-23325.974) \* [-23247.184] (-23275.617) (-23269.943) (-23345.324) -- 5:07:22  
484500 -- (-23238.613) (-23287.563) (-23264.265) (-23299.069) \* [-23245.089] (-23293.218) (-23271.141) (-23316.506) -- 5:07:05  
485000 -- (-23235.194) (-23290.880) (-23250.461) (-23294.746) \* [-23230.472] (-23290.133) (-23270.261) (-23326.802) -- 5:06:47

Average standard deviation of split frequencies: 0.023699

485500 -- [-23234.498] (-23302.816) (-23247.085) (-23299.089) \* [-23241.151] (-23272.992) (-23280.436) (-23331.067) -- 5:06:29  
486000 -- (-23242.407) (-23307.741) (-23264.628) (-23304.522) \* [-23238.037] (-23263.571) (-23297.412) (-23326.529) -- 5:06:11  
486500 -- (-23282.764) (-23288.391) [-23266.900] (-23281.319) \* [-23233.752] (-23267.473) (-23312.304) (-23313.161) -- 5:05:54  
487000 -- (-23270.463) (-23293.207) [-23255.644] (-23332.964) \* [-23228.747] (-23260.873) (-23316.181) (-23306.508) -- 5:05:36  
487500 -- (-23290.414) (-23289.908) [-23255.675] (-23318.951) \* [-23226.540] (-23274.260) (-23318.977) (-23307.960) -- 5:05:19  
488000 -- (-23295.876) (-23273.255) [-23259.114] (-23320.595) \* [-23242.102] (-23268.236) (-23321.318) (-23298.968) -- 5:05:01  
488500 -- (-23284.628) (-23284.584) [-23257.602] (-23318.388) \* [-23223.216] (-23277.399) (-23318.381) (-23324.004) -- 5:04:44  
489000 -- (-23312.625) (-23275.930) [-23240.412] (-23292.515) \* [-23238.498] (-23274.541) (-23303.921) (-23322.625) -- 5:04:26  
489500 -- (-23324.545) (-23250.111) (-23249.796) (-23286.515) \* [-23238.369] (-23273.518) (-23299.333) (-23336.262) -- 5:04:08  
490000 -- (-23336.405) (-23236.355) [-23236.227] (-23282.986) \* [-23238.073] (-23276.482) (-23290.045) (-23322.740) -- 5:03:50

Average standard deviation of split frequencies: 0.024149

490500 -- (-23334.904) (-23241.916) [-23236.776] (-23290.291) \* [-23227.003] (-23268.028) (-23295.766) (-23314.931) -- 5:03:32  
491000 -- (-23350.542) (-23232.881) [-23243.934] (-23275.874) \* [-23232.624] (-23291.669) (-23297.370) (-23285.232) -- 5:03:14  
491500 -- (-23330.403) (-23230.176) [-23247.949] (-23264.900) \* [-23231.117] (-23315.826) (-23298.045) (-23276.143) -- 5:02:56  
492000 -- (-23344.034) (-23242.445) [-23263.679] (-23273.006) \* [-23229.806] (-23312.242) (-23294.259) (-23284.523) -- 5:02:37  
492500 -- (-23350.582) (-23233.281) [-23252.421] (-23280.525) \* [-23243.828] (-23309.439) (-23277.885) (-23306.153) -- 5:02:20  
493000 -- (-23358.858) (-23230.833) (-23234.393) (-23291.217) \* [-23252.991] (-23313.018) (-23289.178) (-23305.268) -- 5:02:01  
493500 -- (-23334.605) (-23212.125) [-23227.014] (-23296.612) \* [-23260.593] (-23310.377) (-23282.666) (-23295.993) -- 5:01:42  
494000 -- (-23327.526) (-23210.896) [-23229.758] (-23279.593) \* (-23258.218) (-23316.929) [-23269.900] (-23298.248) -- 5:01:24  
494500 -- (-23316.722) (-23240.030) [-23217.041] (-23272.637) \* [-23254.074] (-23300.655) (-23266.616) (-23307.828) -- 5:01:06  
495000 -- (-23325.859) (-23243.377) [-23219.899] (-23276.375) \* (-23238.959) (-23273.349) [-23261.962] (-23291.525) -- 5:00:48

Average standard deviation of split frequencies: 0.024610

495500 -- (-23327.892) (-23241.813) [-23218.783] (-23288.777) \* [-23232.935] (-23275.263) (-23270.274) (-23300.387) -- 5:00:30  
496000 -- (-23320.599) (-23235.902) [-23222.910] (-23289.686) \* [-23223.937] (-23274.720) (-23268.410) (-23296.744) -- 5:00:11  
496500 -- (-23305.306) (-23240.412) [-23222.181] (-23313.269) \* [-23222.533] (-23276.780) (-23267.232) (-23293.463) -- 4:59:54  
497000 -- (-23286.064) (-23225.552) [-23232.047] (-23314.437) \* [-23218.145] (-23277.527) (-23278.929) (-23269.107) -- 4:59:36  
497500 -- (-23295.202) (-23237.440) (-23245.269) (-23319.178) \* [-23273.856] (-23278.293) (-23303.708) (-23274.983) -- 4:59:18  
498000 -- (-23291.416) (-23226.192) (-23251.587) (-23307.635) \* [-23221.816] (-23274.573) (-23298.532) (-23273.482) -- 4:59:00  
498500 -- (-23299.747) (-23223.410) (-23243.741) (-23291.437) \* [-23218.861] (-23287.146) (-23315.400) (-23255.448) -- 4:58:42  
499000 -- (-23324.138) (-23241.970) [-23239.247] (-23282.641) \* [-23224.347] (-23303.667) (-23317.722) (-23268.410) -- 4:58:24  
499500 -- (-23338.618) (-23234.483) [-23240.097] (-23325.903) \* [-23220.514] (-23317.416) (-23289.586) (-23259.195) -- 4:58:06  
500000 -- (-23307.762) (-23220.704) (-23241.806) (-23320.658) \* [-23224.464] (-23303.556) (-23286.365) (-23261.243) -- 4:57:48

Average standard deviation of split frequencies: 0.024887

500500 -- (-23279.868) (-23224.505) [-23247.884] (-23308.701) \* [-23227.289] (-23313.184) (-23319.993) (-23288.774) -- 4:57:30  
501000 -- (-23259.231) (-23221.816) (-23253.932) (-23304.741) \* [-23242.760] (-23312.431) (-23346.766) (-23291.918) -- 4:57:12  
501500 -- (-23250.179) (-23220.306) [-23262.098] (-23307.752) \* [-23239.038] (-23300.032) (-23348.648) (-23280.332) -- 4:56:53  
502000 -- (-23277.817) (-23222.881) (-23278.677) (-23313.124) \* [-23231.648] (-23319.226) (-23360.015) (-23289.871) -- 4:56:36  
502500 -- (-23277.543) (-23233.227) [-23269.555] (-23286.178) \* [-23237.299] (-23312.258) (-23337.913) (-23292.632) -- 4:56:17  
503000 -- (-23286.560) (-23243.166) (-23291.545) (-23296.862) \* [-23242.289] (-23300.507) (-23305.056) (-23291.007) -- 4:55:59  
503500 -- (-23306.274) (-23239.040) [-23280.922] (-23299.351) \* [-23261.042] (-23288.138) (-23296.833) (-23298.900) -- 4:55:41  
504000 -- (-23292.348) (-23243.230) [-23272.568] (-23313.177) \* [-23257.882] (-23292.358) (-23297.929) (-23284.581) -- 4:55:24  
504500 -- (-23298.737) (-23224.343) [-23256.730] (-23302.553) \* [-23257.534] (-23289.969) (-23313.648) (-23293.757) -- 4:55:06  
505000 -- (-23307.791) (-23217.454) (-23255.902) (-23281.405) \* [-23258.896] (-23257.254) (-23297.870) (-23311.655) -- 4:54:48

Average standard deviation of split frequencies: 0.025154

505500 -- (-23310.675) [-23236.224] (-23276.576) (-23290.593) \* (-23257.510) [-23257.056] (-23298.277) (-23300.696) -- 4:54:30  
506000 -- (-23323.339) [-23229.324] (-23269.499) (-23295.443) \* (-23266.837) (-23258.384) (-23281.508) (-23296.473) -- 4:54:14  
506500 -- (-23323.003) (-23226.330) [-23257.277] (-23287.909) \* (-23273.838) (-23259.961) (-23295.001) (-23318.700) -- 4:53:56  
507000 -- (-23320.016) (-23242.952) [-23256.197] (-23285.682) \* [-23239.845] (-23254.790) (-23286.852) (-23323.353) -- 4:53:37  
507500 -- (-23319.533) (-23223.793) [-23250.585] (-23282.258) \* [-23257.572] (-23240.327) (-23309.066) (-23316.818) -- 4:53:19  
508000 -- (-23333.614) (-23214.684) (-23272.480) (-23287.018) \* [-23256.525] (-23235.158) (-23308.817) (-23320.244) -- 4:53:02  
508500 -- (-23330.661) (-23216.839) (-23287.921) (-23289.622) \* [-23266.269] (-23247.502) (-23305.328) (-23330.822) -- 4:52:43  
509000 -- (-23334.668) (-23218.501) (-23281.330) (-23299.644) \* (-23262.085) (-23236.932) (-23299.955) (-23322.524) -- 4:52:25  
509500 -- (-23313.778) (-23226.407) (-23273.324) (-23302.761) \* [-23275.889] (-23243.937) (-23276.727) (-23329.595) -- 4:52:08  
510000 -- (-23335.749) (-23207.785) (-23261.441) (-23284.783) \* (-23282.600) (-23240.537) (-23266.233) (-23330.677) -- 4:51:51

Average standard deviation of split frequencies: 0.025211

510500 -- (-23335.416) [-23206.143] (-23275.305) (-23282.592) \* (-23289.137) [-23243.094] (-23261.137) (-23320.530) -- 4:51:33  
511000 -- (-23297.880) (-23212.523) (-23266.051) (-23281.896) \* (-23300.406) (-23240.856) (-23270.685) (-23306.637) -- 4:51:15  
511500 -- (-23306.093) (-23199.002) (-23256.693) (-23283.926) \* (-23309.029) [-23241.046] (-23276.935) (-23320.507) -- 4:50:58  
512000 -- (-23307.841) (-23200.157) (-23266.073) (-23295.303) \* (-23297.464) (-23236.669) (-23271.073) (-23348.619) -- 4:50:41  
512500 -- (-23307.416) (-23197.074) (-23276.698) (-23284.545) \* (-23285.004) (-23258.655) (-23280.782) (-23326.149) -- 4:50:23  
513000 -- (-23301.785) (-23227.089) [-23258.000] (-23284.221) \* (-23284.108) (-23258.182) (-23282.870) (-23326.545) -- 4:50:06  
513500 -- (-23308.052) (-23220.524) (-23244.639) (-23285.980) \* (-23278.672) (-23263.638) (-23269.999) (-23333.928) -- 4:49:49  
514000 -- (-23310.204) (-23213.884) [-23250.643] (-23288.267) \* (-23289.301) (-23248.665) (-23260.917) (-23341.920) -- 4:49:33  
514500 -- (-23293.905) (-23193.964) (-23259.988) (-23299.261) \* (-23290.534) (-23260.419) (-23263.880) (-23321.557) -- 4:49:15  
515000 -- (-23301.369) (-23206.994) (-23265.228) (-23300.542) \* (-23295.261) [-23257.922] (-23285.803) (-23311.535) -- 4:48:58

Average standard deviation of split frequencies: 0.024850

515500 -- (-23317.490) (-23218.435) (-23287.286) (-23297.989) \* (-23289.830) [-23244.695] (-23283.975) (-23312.684) -- 4:48:40  
516000 -- (-23295.566) (-23229.495) [-23269.407] (-23279.124) \* (-23301.916) [-23245.200] (-23282.483) (-23316.021) -- 4:48:23  
516500 -- (-23289.227) (-23210.905) (-23288.474) (-23295.131) \* (-23298.888) (-23253.970) (-23277.372) (-23312.902) -- 4:48:06  
517000 -- (-23296.193) (-23214.418) (-23280.235) (-23308.097) \* (-23292.865) (-23250.128) (-23278.617) (-23325.237) -- 4:47:48  
517500 -- (-23328.992) (-23214.486) (-23267.323) (-23301.952) \* (-23292.828) (-23259.451) (-23263.507) (-23308.121) -- 4:47:31  
518000 -- (-23351.290) (-23210.949) [-23277.120] (-23312.099) \* (-23306.134) (-23253.005) (-23263.303) (-23307.334) -- 4:47:14  
518500 -- (-23311.220) (-23216.394) (-23253.750) (-23321.748) \* (-23301.903) (-23251.231) (-23236.170) (-23304.217) -- 4:46:56  
519000 -- (-23313.033) (-23217.249) (-23253.327) (-23306.742) \* (-23308.219) (-23255.149) (-23227.477) (-23308.465) -- 4:46:39

519500 -- (-23306.874) [-23221.076] (-23269.955) (-23294.842) \* (-23306.071) (-23256.986) [-23240.540] (-23276.369) -- 4:46:22  
520000 -- (-23328.439) [-23247.480] (-23272.807) (-23288.860) \* (-23282.654) (-23258.729) [-23242.800] (-23294.540) -- 4:46:05

Average standard deviation of split frequencies: 0.024370

520500 -- (-23327.093) [-23231.600] (-23265.361) (-23296.406) \* (-23297.135) (-23260.161) [-23236.472] (-23311.429) -- 4:45:47  
521000 -- (-23309.294) [-23246.471] (-23268.077) (-23324.007) \* (-23284.937) (-23282.110) [-23233.408] (-23318.172) -- 4:45:30  
521500 -- (-23306.834) [-23254.730] (-23265.762) (-23328.900) \* (-23289.388) (-23272.333) [-23225.586] (-23330.026) -- 4:45:12  
522000 -- (-23312.956) [-23261.287] (-23262.066) (-23318.624) \* (-23285.299) (-23270.271) [-23221.901] (-23313.831) -- 4:44:54  
522500 -- (-23294.469) [-23253.726] (-23258.373) (-23314.418) \* (-23293.711) (-23274.111) [-23240.316] (-23297.624) -- 4:44:36  
523000 -- (-23286.676) [-23254.058] (-23247.151) (-23287.166) \* (-23278.879) (-23281.494) [-23256.668] (-23288.874) -- 4:44:17  
523500 -- (-23277.641) [-23279.338] (-23255.114) (-23305.926) \* (-23275.129) (-23299.095) [-23255.013] (-23292.537) -- 4:44:00  
524000 -- (-23254.195) [-23266.918] (-23255.143) (-23294.583) \* (-23283.284) (-23281.596) [-23249.974] (-23279.889) -- 4:43:43  
524500 -- (-23256.892) [-23273.272] (-23259.038) (-23318.474) \* (-23304.132) (-23284.812) [-23242.014] (-23313.517) -- 4:43:25  
525000 -- (-23248.198) [-23252.513] (-23255.564) (-23338.366) \* (-23308.619) (-23284.106) [-23239.923] (-23307.854) -- 4:43:07

Average standard deviation of split frequencies: 0.023985

525500 -- (-23253.547) (-23255.236) [-23244.381] (-23361.668) \* (-23299.644) (-23275.801) [-23235.130] (-23298.263) -- 4:42:50  
526000 -- (-23259.818) [-23252.831] (-23244.093) (-23343.516) \* (-23298.602) (-23275.890) [-23237.499] (-23323.031) -- 4:42:34  
526500 -- (-23275.854) [-23248.455] [-23239.835] (-23329.991) \* (-23297.328) (-23269.505) [-23242.905] (-23315.930) -- 4:42:16  
527000 -- (-23290.439) [-23271.343] (-23251.249) (-23334.292) \* (-23286.186) (-23268.021) [-23252.981] (-23310.388) -- 4:41:58  
527500 -- (-23304.027) [-23264.819] [-23259.183] (-23315.510) \* (-23301.974) [-23263.965] (-23250.186) (-23314.251) -- 4:41:40  
528000 -- (-23321.454) (-23260.735) [-23244.259] (-23295.611) \* (-23296.498) (-23266.300) [-23238.959] (-23318.777) -- 4:41:22  
528500 -- (-23341.195) (-23254.735) [-23239.712] (-23299.773) \* (-23304.380) (-23272.690) [-23217.011] (-23305.452) -- 4:41:05  
529000 -- (-23317.901) [-23257.799] [-23242.975] (-23325.389) \* (-23287.116) (-23258.606) [-23219.193] (-23300.308) -- 4:40:47  
529500 -- (-23300.890) [-23246.905] [-23257.744] (-23341.075) \* (-23284.597) (-23244.384) [-23210.163] (-23306.890) -- 4:40:29  
530000 -- (-23301.430) [-23260.790] (-23260.928) (-23330.927) \* (-23260.532) (-23237.363) [-23230.749] (-23320.186) -- 4:40:11

Average standard deviation of split frequencies: 0.023782

530500 -- (-23302.964) [-23250.501] (-23288.817) (-23332.333) \* (-23288.398) (-23244.692) [-23243.472] (-23327.215) -- 4:39:54  
531000 -- (-23306.322) [-23238.133] (-23283.717) (-23332.586) \* (-23284.726) (-23254.089) [-23230.700] (-23337.338) -- 4:39:36  
531500 -- (-23293.054) [-23249.308] (-23273.248) (-23327.679) \* (-23288.106) (-23246.548) [-23224.314] (-23342.611) -- 4:39:18  
532000 -- (-23291.281) [-23250.914] (-23247.186) (-23335.594) \* (-23311.172) (-23256.827) [-23250.125] (-23344.602) -- 4:39:01  
532500 -- (-23298.395) [-23245.793] (-23246.574) (-23318.839) \* (-23296.438) (-23248.415) [-23235.370] (-23334.327) -- 4:38:43  
533000 -- (-23281.850) [-23249.502] (-23242.704) (-23313.084) \* (-23286.207) (-23255.272) [-23235.256] (-23351.323) -- 4:38:25  
533500 -- (-23261.695) [-23244.450] (-23237.021) (-23319.160) \* (-23296.750) (-23235.972) [-23243.673] (-23360.982) -- 4:38:08  
534000 -- (-23269.805) (-23263.625) [-23247.534] (-23327.100) \* (-23273.661) (-23246.845) [-23234.470] (-23336.864) -- 4:37:51  
534500 -- (-23260.924) (-23264.259) [-23242.174] (-23337.749) \* (-23267.770) [-23231.355] (-23252.710) (-23305.384) -- 4:37:33  
535000 -- (-23285.726) (-23276.809) [-23254.855] (-23336.079) \* (-23275.859) (-23241.163) [-23264.905] (-23345.881) -- 4:37:15

Average standard deviation of split frequencies: 0.023842

535500 -- (-23297.419) (-23268.178) [-23256.260] (-23325.068) \* (-23260.562) [-23232.072] (-23262.243) (-23331.606) -- 4:36:57  
536000 -- (-23298.316) [-23259.012] [-23263.013] (-23310.771) \* (-23271.883) [-23228.105] (-23256.189) (-23303.917) -- 4:36:40  
536500 -- (-23296.489) [-23237.769] [-23247.326] (-23311.928) \* (-23270.384) [-23235.189] (-23252.200) (-23289.269) -- 4:36:22  
537000 -- (-23270.433) [-23259.694] (-23241.597) (-23331.154) \* (-23267.164) [-23241.690] (-23239.675) (-23292.027) -- 4:36:04  
537500 -- (-23276.107) [-23261.384] (-23248.890) (-23330.452) \* (-23283.807) [-23247.770] (-23244.519) (-23283.704) -- 4:35:47  
538000 -- (-23288.259) [-23264.910] [-23250.443] (-23316.795) \* (-23282.410) [-23251.148] (-23278.329) (-23260.892) -- 4:35:28  
538500 -- (-23294.782) [-23254.080] (-23246.400) (-23310.935) \* (-23276.086) (-23254.284) [-23274.960] (-23266.991) -- 4:35:11  
539000 -- (-23302.830) [-23247.675] (-23257.457) (-23317.369) \* (-23282.917) (-23286.428) [-23275.604] (-23258.507) -- 4:34:53  
539500 -- (-23276.419) [-23255.737] (-23264.445) (-23321.694) \* (-23265.784) (-23293.586) (-23276.986) [-23256.527] -- 4:34:35  
540000 -- (-23282.085) (-23254.898) [-23258.347] (-23320.861) \* (-23261.943) (-23304.381) (-23270.169) [-23267.580] -- 4:34:18

Average standard deviation of split frequencies: 0.023610

540500 -- (-23275.753) (-23257.912) [-23246.985] (-23321.350) \* (-23246.916) (-23303.401) (-23278.911) [-23256.897] -- 4:34:00  
541000 -- (-23311.654) [-23275.945] [-23243.837] (-23324.424) \* (-23254.869) (-23280.883) (-23297.282) [-23236.855] -- 4:33:43  
541500 -- (-23293.020) [-23269.140] [-23249.992] (-23320.453) \* (-23276.667) (-23263.014) (-23269.694) [-23215.971] -- 4:33:26  
542000 -- (-23293.070) [-23269.687] [-23256.239] (-23305.608) \* (-23292.278) (-23259.524) (-23280.524) [-23216.237] -- 4:33:09  
542500 -- (-23299.407) [-23259.223] [-23234.448] (-23298.314) \* (-23275.205) (-23265.439) (-23287.874) [-23221.422] -- 4:32:50  
543000 -- (-23295.331) (-23284.813) [-23231.791] (-23297.185) \* (-23296.361) (-23246.041) (-23298.622) [-23219.641] -- 4:32:32  
543500 -- (-23308.073) [-23276.758] [-23235.486] (-23303.256) \* (-23288.922) (-23276.247) (-23296.766) [-23215.157] -- 4:32:14  
544000 -- (-23278.518) [-23282.766] [-23237.635] (-23298.074) \* (-23298.646) (-23283.122) (-23309.624) [-23218.959] -- 4:31:56  
544500 -- (-23257.707) [-23271.922] [-23224.455] (-23298.228) \* (-23317.705) (-23275.330) (-23337.691) [-23242.952] -- 4:31:38  
545000 -- (-23245.361) (-23279.944) [-23218.944] (-23301.012) \* (-23319.112) (-23260.562) (-23313.839) [-23232.537] -- 4:31:19

Average standard deviation of split frequencies: 0.023852

545500 -- (-23248.248) (-23289.700) [-23233.129] (-23313.507) \* (-23318.176) (-23277.576) (-23313.088) [-23220.582] -- 4:31:02  
546000 -- (-23238.095) (-23300.574) [-23246.678] (-23317.100) \* (-23330.825) (-23288.458) (-23283.435) [-23234.478] -- 4:30:44  
546500 -- (-23226.557) [-23304.767] (-23260.369) (-23317.273) \* (-23317.090) (-23278.399) (-23292.630) [-23245.225] -- 4:30:26  
547000 -- (-23232.457) [-23222.431] (-23250.650) (-23286.850) \* (-23318.006) (-23269.908) (-23287.178) [-23255.838] -- 4:30:08  
547500 -- (-23235.260) [-23226.053] (-23263.918) (-23299.204) \* (-23328.727) (-23281.170) (-23294.546) [-23252.712] -- 4:29:50  
548000 -- (-23240.182) [-23303.755] (-23255.920) (-23301.176) \* (-23334.982) (-23269.642) (-23295.433) [-23245.322] -- 4:29:33  
548500 -- (-23246.946) [-23315.826] (-23277.737) (-23299.601) \* (-23317.071) (-23253.934) (-23299.704) [-23260.166] -- 4:29:15  
549000 -- (-23267.911) [-23293.049] (-23263.821) (-23314.516) \* (-23336.601) (-23256.197) (-23305.140) [-23249.633] -- 4:28:57  
549500 -- (-23267.601) (-23305.048) [-23242.853] (-23330.977) \* (-23319.760) (-23262.297) (-23316.371) [-23248.858] -- 4:28:39  
550000 -- (-23263.180) (-23291.526) [-23243.092] (-23331.329) \* (-23321.095) (-23244.989) (-23313.722) [-23237.714] -- 4:28:21

Average standard deviation of split frequencies: 0.024041

550500 -- (-23267.665) (-23287.995) [-23236.201] (-23336.033) \* (-23331.873) (-23246.597) (-23301.687) [-23242.396] -- 4:28:03  
551000 -- (-23262.538) (-23272.694) [-23238.289] (-23340.395) \* (-23318.168) (-23238.609) (-23310.901) [-23243.452] -- 4:27:45  
551500 -- (-23268.056) [-23276.420] (-23239.239) (-23324.265) \* (-23314.118) (-23240.486) (-23323.851) (-23251.864) -- 4:27:26  
552000 -- (-23295.441) [-23249.799] (-23238.282) (-23328.162) \* (-23312.581) [-23243.440] (-23324.688) (-23260.608) -- 4:27:08  
552500 -- (-23297.130) [-23249.068] (-23233.825) (-23312.450) \* (-23323.753) [-23239.394] (-23319.580) (-23233.059) -- 4:26:51  
553000 -- (-23279.219) [-23248.202] (-23228.319) (-23312.519) \* (-23309.825) [-23233.025] (-23314.921) (-23254.905) -- 4:26:34  
553500 -- (-23278.835) [-23245.164] (-23247.305) (-23295.295) \* (-23307.761) [-23231.642] (-23317.600) (-23251.696) -- 4:26:16  
554000 -- (-23291.162) [-23246.691] (-23229.020) (-23277.361) \* (-23303.633) [-23222.044] (-23302.039) (-23255.523) -- 4:25:59  
554500 -- (-23304.157) [-23234.464] (-23252.478) (-23298.034) \* (-23299.150) [-23224.858] (-23300.068) (-23252.625) -- 4:25:41  
555000 -- (-23310.320) (-23254.033) [-23254.858] (-23286.070) \* (-23298.128) (-23217.569) (-23285.685) (-23260.870) -- 4:25:23

Average standard deviation of split frequencies: 0.023804

555500 -- (-23321.904) [-23254.419] (-23263.993) (-23280.140) \* (-23319.754) [-23210.337] (-23277.822) (-23265.445) -- 4:25:05  
556000 -- (-23302.259) [-23241.605] (-23269.778) (-23283.404) \* (-23321.778) [-23225.488] (-23278.848) (-23257.275) -- 4:24:48  
556500 -- (-23296.556) [-23259.739] (-23242.147) (-23245.276) \* (-23322.787) [-23235.176] (-23286.095) (-23261.211) -- 4:24:31  
557000 -- (-23299.942) [-23278.260] (-23249.925) [-23247.869] \* (-23340.469) [-23251.202] (-23274.518) (-23262.103) -- 4:24:13  
557500 -- (-23310.374) (-23284.590) [-23243.029] (-23239.926) \* (-23352.544) [-23243.822] (-23265.516) (-23263.829) -- 4:23:56  
558000 -- (-23296.194) (-23284.923) (-23242.831) [-23228.136] \* (-23332.785) [-23228.616] (-23286.276) (-23271.775) -- 4:23:38  
558500 -- (-23289.329) (-23282.961) [-23236.944] (-23236.371) \* (-23338.258) [-23225.362] (-23279.460) (-23271.790) -- 4:23:20  
559000 -- (-23298.590) [-23269.181] (-23234.818) (-23245.489) \* (-23329.963) [-23217.608] (-23270.163) (-23262.350) -- 4:23:02  
559500 -- (-23320.928) (-23266.258) [-23242.807] (-23233.961) \* (-23322.016) [-23230.005] (-23260.614) (-23267.322) -- 4:22:45  
560000 -- (-23336.631) [-23252.154] (-23247.068) (-23268.642) \* (-23324.553) [-23230.001] (-23249.852) (-23270.773) -- 4:22:27

Average standard deviation of split frequencies: 0.023366

560500 -- (-23317.330) (-23238.116) [-23245.858] (-23289.089) \* (-23316.023) [-23216.309] (-23252.455) (-23288.268) -- 4:22:08  
561000 -- (-23315.236) (-23257.383) [-23245.904] (-23286.856) \* (-23312.958) [-23229.425] (-23259.716) (-23281.788) -- 4:21:51  
561500 -- (-23293.738) (-23252.220) [-23241.541] (-23297.770) \* (-23324.880) [-23215.760] (-23274.191) (-23296.921) -- 4:21:33  
562000 -- (-23298.782) (-23248.119) [-23243.970] (-23327.801) \* (-23310.627) [-23220.341] (-23279.304) (-23290.585) -- 4:21:16  
562500 -- (-23282.640) [-23238.513] (-23247.134) (-23303.092) \* (-23288.796) [-23242.159] (-23292.877) (-23275.046) -- 4:20:58  
563000 -- (-23274.542) [-23246.901] (-23258.513) (-23320.240) \* (-23313.401) [-23241.278] (-23289.549) (-23265.686) -- 4:20:39  
563500 -- (-23284.860) [-23243.110] (-23256.939) (-23316.290) \* (-23284.095) [-23229.667] (-23305.859) (-23268.843) -- 4:20:21  
564000 -- (-23279.964) [-23242.596] (-23257.749) (-23331.075) \* (-23284.200) [-23219.769] (-23312.219) (-23287.639) -- 4:20:04  
564500 -- (-23282.082) [-23253.729] (-23240.932) [-23324.834] \* (-23285.957) [-23232.113] (-23299.281) (-23298.257) -- 4:19:46  
565000 -- (-23264.622) (-23262.922) [-23237.256] (-23308.980) \* (-23297.285) [-23238.608] (-23290.965) (-23287.495) -- 4:19:28

Average standard deviation of split frequencies: 0.022681

565500 -- (-23267.675) [-23252.393] (-23226.442) (-23319.866) \* (-23291.602) [-23219.232] (-23295.139) (-23286.095) -- 4:19:09  
566000 -- (-23261.861) (-23264.467) [-23216.433] (-23327.124) \* (-23293.471) [-23233.141] (-23280.592) (-23286.346) -- 4:18:51  
566500 -- (-23273.127) [-23258.479] [-23219.125] (-23305.266) \* (-23265.611) [-23233.851] (-23277.030) (-23278.921) -- 4:18:31  
567000 -- (-23262.079) [-23249.848] (-23240.184) (-23306.589) \* (-23269.882) [-23234.946] (-23295.580) (-23294.259) -- 4:18:14  
567500 -- (-23258.960) [-23248.271] (-23244.105) (-23309.458) \* (-23272.153) [-23232.695] (-23313.204) (-23293.208) -- 4:17:55  
568000 -- (-23259.399) [-23246.092] (-23261.670) (-23305.499) \* (-23264.761) [-23226.800] (-23307.176) (-23271.639) -- 4:17:36  
568500 -- (-23243.857) [-23242.543] (-23277.211) (-23304.624) \* (-23279.152) [-23236.189] (-23293.166) (-23292.566) -- 4:17:19  
569000 -- (-23236.052) [-23250.143] (-23268.246) (-23309.054) \* (-23279.379) [-23231.451] (-23303.520) (-23308.077) -- 4:17:00  
569500 -- (-23247.473) [-23269.542] (-23260.495) (-23305.173) \* (-23271.832) [-23227.853] (-23306.433) (-23291.504) -- 4:16:42  
570000 -- (-23250.134) (-23273.803) (-23265.269) (-23309.152) \* (-23265.678) [-23238.002] (-23317.694) (-23275.552) -- 4:16:24

Average standard deviation of split frequencies: 0.022342

570500 -- (-23267.141) (-23282.701) (-23270.563) (-23338.248) \* (-23266.269) [-23233.799] (-23343.057) (-23283.777) -- 4:16:05  
571000 -- (-23239.739) [-23286.270] (-23260.005) (-23302.283) \* (-23256.608) [-23253.254] (-23320.291) (-23274.865) -- 4:15:47  
571500 -- (-23242.692) [-23290.496] (-23266.328) (-23303.109) \* (-23273.320) [-23255.399] (-23305.303) (-23286.033) -- 4:15:29  
572000 -- (-23261.135) [-23296.413] (-23261.552) (-23293.335) \* (-23260.886) [-23234.185] (-23328.225) (-23280.857) -- 4:15:11  
572500 -- (-23266.325) [-23277.221] (-23254.471) (-23319.251) \* (-23246.643) [-23232.988] (-23318.390) (-23291.064) -- 4:14:53  
573000 -- (-23263.537) [-23275.132] (-23255.577) (-23313.162) \* (-23254.809) [-23237.893] (-23300.734) (-23281.613) -- 4:14:35  
573500 -- (-23275.176) (-23288.559) [-23264.978] (-23303.364) \* (-23267.144) [-23237.987] (-23307.640) (-23286.402) -- 4:14:18  
574000 -- (-23272.608) (-23285.258) [-23270.543] (-23303.019) \* (-23267.076) [-23230.115] (-23326.004) (-23299.418) -- 4:14:00  
574500 -- (-23280.629) [-23290.594] [-23257.477] (-23287.988) \* (-23279.235) [-23244.361] (-23321.947) (-23284.175) -- 4:13:42  
575000 -- (-23277.946) (-23284.870) [-23253.317] (-23298.268) \* (-23294.842) [-23240.171] (-23347.191) (-23271.017) -- 4:13:24

Average standard deviation of split frequencies: 0.022166

575500 -- (-23280.339) (-23276.816) [-23265.312] (-23284.921) \* (-23282.151) [-23246.762] (-23351.833) (-23271.298) -- 4:13:06  
576000 -- (-23286.291) [-23296.496] [-23262.089] (-23300.690) \* (-23278.804) [-23260.644] (-23331.812) (-23267.124) -- 4:12:49  
576500 -- (-23304.461) (-23282.590) [-23267.462] (-23282.653) \* (-23271.925) [-23250.540] (-23337.893) (-23268.623) -- 4:12:31  
577000 -- (-23304.920) [-23268.291] [-23266.282] (-23278.245) \* (-23273.822) [-23271.536] (-23324.965) (-23267.876) -- 4:12:14  
577500 -- (-23288.539) [-23260.691] [-23281.771] (-23285.675) \* (-23266.220) [-23274.613] (-23327.880) (-23271.550) -- 4:11:57  
578000 -- (-23303.052) [-23268.779] [-23269.772] (-23272.326) \* (-23290.783) [-23263.455] (-23290.293) (-23268.370) -- 4:11:39  
578500 -- (-23279.900) [-23252.168] (-23289.564) (-23257.382) \* (-23303.613) [-23263.064] (-23286.083) [-23247.191] -- 4:11:22  
579000 -- (-23290.596) [-23246.099] (-23279.661) [-23265.849] \* (-23296.522) [-23244.980] (-23290.651) (-23255.878) -- 4:11:05  
579500 -- (-23296.352) [-23285.349] (-23260.466) [-23267.882] \* (-23294.355) [-23244.422] (-23273.183) (-23250.827) -- 4:10:47  
580000 -- (-23286.178) (-23295.330) (-23254.875) [-23255.616] \* (-23296.660) (-23267.290) (-23291.338) [-23249.798] -- 4:10:29

Average standard deviation of split frequencies: 0.021979

580500 -- (-23290.213) (-23295.085) [-23252.574] (-23266.188) \* (-23298.248) (-23253.642) (-23278.338) [-23241.150] -- 4:10:12  
581000 -- (-23312.802) [-23291.967] [-23256.118] (-23281.950) \* (-23304.377) [-23244.411] (-23279.274) (-23246.132) -- 4:09:54  
581500 -- (-23303.561) [-23295.068] [-23253.640] (-23275.065) \* (-23281.153) (-23252.946) [-23261.698] (-23266.875) -- 4:09:37  
582000 -- (-23303.607) [-23279.520] [-23255.926] (-23270.508) \* (-23293.050) [-23240.240] (-23281.105) (-23261.781) -- 4:09:19  
582500 -- (-23306.565) [-23278.064] [-23244.542] (-23265.328) \* (-23288.541) (-23208.251) (-23281.670) (-23260.026) -- 4:09:02  
583000 -- (-23335.160) [-23279.194] [-23242.545] (-23262.645) \* (-23279.902) [-23228.680] (-23303.155) (-23261.435) -- 4:08:44  
583500 -- (-23334.200) [-23281.091] [-23258.161] (-23277.302) \* (-23300.809) [-23239.638] (-23292.466) (-23251.668) -- 4:08:26  
584000 -- (-23316.734) [-23286.385] [-23261.928] (-23281.969) \* (-23280.331) [-23243.952] (-23288.440) (-23265.681) -- 4:08:09  
584500 -- (-23314.668) [-23293.940] (-23258.470) [-23267.118] \* (-23268.366) [-23242.007] (-23290.942) (-23254.452) -- 4:07:51  
585000 -- (-23309.110) [-23295.164] [-23264.553] (-23250.382) \* (-23258.730) (-23271.990) (-23319.043) [-23233.883] -- 4:07:34

Average standard deviation of split frequencies: 0.021602

585500 -- (-23302.520) (-23280.706) [-23252.751] (-23265.675) \* (-23255.841) (-23270.391) (-23319.707) [-23227.931] -- 4:07:17  
586000 -- (-23320.279) [-23277.497] (-23259.590) [-23256.838] \* (-23268.603) (-23270.665) (-23313.513) [-23223.318] -- 4:06:58  
586500 -- (-23311.026) [-23264.287] (-23267.280) [-23251.461] \* (-23234.582) (-23276.671) (-23313.431) [-23217.805] -- 4:06:40  
587000 -- (-23312.554) [-23247.692] [-23264.029] (-23252.381) \* (-23262.848) (-23264.527) [-23329.387] [-23231.207] -- 4:06:22  
587500 -- (-23334.232) [-23272.133] [-23242.144] (-23237.776) \* (-23258.625) (-23291.883) (-23317.710) [-23218.078] -- 4:06:05  
588000 -- (-23329.818) [-23270.812] (-23248.101) [-23230.198] \* (-23268.162) (-23279.663) (-23316.845) [-23242.143] -- 4:05:47  
588500 -- (-23341.286) [-23250.116] (-23251.777) [-23241.121] \* (-23263.074) (-23285.195) (-23293.269) [-23244.457] -- 4:05:29  
589000 -- (-23326.129) [-23238.970] (-23255.300) [-23228.449] \* (-23260.715) (-23267.549) (-23280.612) [-23266.108] -- 4:05:11  
589500 -- (-23312.833) [-23246.093] (-23246.394) [-23226.457] \* (-23264.278) [-23273.047] (-23307.380) [-23272.987] -- 4:04:53  
590000 -- (-23297.725) [-23261.819] (-23252.270) [-23222.189] \* (-23281.601) [-23268.029] (-23304.044) (-23281.025) -- 4:04:35

Average standard deviation of split frequencies: 0.021567

590500 -- (-23283.902) (-23264.851) (-23255.622) [-23225.898] \* (-23277.001) [-23259.558] (-23316.255) (-23275.633) -- 4:04:17  
591000 -- (-23293.076) (-23273.965) (-23258.759) [-23241.038] \* (-23260.387) (-23270.917) (-23307.266) [-23257.158] -- 4:04:00  
591500 -- (-23319.127) (-23270.076) (-23262.846) [-23232.400] \* (-23271.253) (-23273.654) (-23300.778) (-23272.323) -- 4:03:42  
592000 -- (-23304.212) (-23264.921) (-23266.084) [-23246.469] \* (-23242.272) (-23277.746) (-23323.253) [-23266.230] -- 4:03:24  
592500 -- (-23295.604) [-23278.928] (-23251.247) [-23231.027] \* (-23247.170) (-23283.683) (-23334.593) (-23275.704) -- 4:03:06  
593000 -- (-23300.705) [-23252.330] (-23245.401) (-23242.802) \* (-23249.463) (-23268.680) (-23344.152) (-23265.591) -- 4:02:48  
593500 -- (-23323.279) [-23259.145] (-23250.840) (-23234.084) \* (-23274.072) (-23257.782) (-23333.262) [-23248.291] -- 4:02:31  
594000 -- (-23356.065) (-23262.869) (-23261.121) [-23233.320] \* (-23294.353) (-23285.398) (-23329.545) [-23250.613] -- 4:02:13  
594500 -- (-23352.091) (-23275.834) (-23262.161) [-23238.078] \* (-23291.296) (-23289.299) (-23314.141) [-23254.691] -- 4:01:55  
595000 -- (-23367.020) (-23289.083) (-23275.199) [-23237.768] \* (-23287.079) (-23278.523) (-23324.227) [-23234.900] -- 4:01:37

Average standard deviation of split frequencies: 0.021557

595500 -- (-23333.525) (-23273.480) [-23278.854] (-23266.849) \* (-23276.589) (-23252.064) (-23329.488) [-23236.008] -- 4:01:19  
596000 -- (-23336.843) (-23268.077) [-23277.428] (-23256.274) \* (-23278.591) (-23262.724) (-23309.912) [-23236.223] -- 4:01:01  
596500 -- (-23294.466) (-23262.352) [-23287.261] (-23252.892) \* (-23282.561) (-23267.681) (-23313.267) [-23233.452] -- 4:00:44  
597000 -- (-23299.753) [-23265.658] (-23282.442) (-23263.622) \* (-23274.981) (-23269.679) (-23314.192) [-23244.382] -- 4:00:25  
597500 -- (-23290.080) [-23265.633] (-23307.067) (-23263.814) \* (-23284.346) (-23256.433) (-23313.016) (-23265.074) -- 4:00:07  
598000 -- (-23298.362) (-23260.237) (-23312.534) [-23272.765] \* (-23291.666) (-23257.835) (-23321.775) [-23248.335] -- 3:59:48  
598500 -- (-23291.568) [-23270.376] (-23297.921) (-23284.791) \* (-23274.975) (-23271.561) (-23314.541) [-23229.575] -- 3:59:30  
599000 -- (-23286.355) (-23258.154) (-23282.724) (-23282.178) \* (-23288.432) (-23287.009) (-23324.822) [-23224.509] -- 3:59:12  
599500 -- (-23293.593) (-23271.611) (-23292.277) [-23288.623] \* (-23278.834) (-23297.237) (-23302.224) [-23231.333] -- 3:58:54  
600000 -- (-23292.980) (-23275.857) (-23304.117) [-23259.061] \* (-23291.682) (-23285.972) (-23296.861) [-23228.938] -- 3:58:36

Average standard deviation of split frequencies: 0.021182

600500 -- (-23297.207) (-23279.632) (-23293.953) [-23242.695] \* (-23272.975) (-23283.152) (-23328.387) [-23249.528] -- 3:58:18  
601000 -- (-23278.308) (-23279.850) (-23300.372) [-23254.390] \* (-23264.161) (-23279.489) (-23324.746) [-23242.778] -- 3:57:59  
601500 -- (-23277.859) (-23273.967) (-23292.465) (-23271.403) \* (-23260.869) (-23271.196) (-23306.161) [-23238.387] -- 3:57:41

602000 -- [-23257.179] (-23276.685) (-23310.221) (-23276.200) \* (-23258.307) (-23281.653) (-23299.834) [-23235.034] -- 3:57:22  
602500 -- [-23240.209] (-23283.373) (-23315.125) (-23291.592) \* (-23248.579) (-23295.652) (-23285.651) [-23235.056] -- 3:57:04  
603000 -- [-23248.245] (-23278.776) (-23317.359) (-23298.795) \* [-23237.173] (-23298.827) (-23280.489) (-23228.607) -- 3:56:46  
603500 -- [-23241.895] (-23282.750) (-23328.998) (-23317.392) \* (-23247.122) (-23331.852) (-23264.569) [-23237.090] -- 3:56:27  
604000 -- [-23239.789] (-23261.729) (-23313.509) (-23286.962) \* [-23243.930] (-23332.250) (-23239.079) (-23264.679) -- 3:56:09  
604500 -- (-23246.276) [-23258.828] (-23303.584) (-23290.715) \* [-23236.202] (-23304.989) (-23261.462) (-23260.433) -- 3:55:50  
605000 -- [-23248.300] (-23260.982) (-23306.131) (-23277.137) \* [-23241.082] (-23300.203) (-23246.594) (-23270.575) -- 3:55:31

Average standard deviation of split frequencies: 0.021016

605500 -- [-23234.319] (-23274.249) (-23308.312) (-23295.051) \* (-23239.733) (-23290.516) [-23230.772] (-23287.086) -- 3:55:14  
606000 -- [-23239.747] (-23266.618) (-23288.717) (-23275.489) \* (-23247.434) (-23290.784) [-23227.888] (-23294.775) -- 3:54:55  
606500 -- [-23235.056] (-23288.510) (-23294.164) (-23270.950) \* [-23233.846] (-23308.402) (-23241.991) (-23308.101) -- 3:54:37  
607000 -- [-23235.475] (-23280.137) (-23273.632) (-23263.906) \* [-23234.170] (-23311.356) (-23260.608) (-23312.969) -- 3:54:19  
607500 -- [-23232.510] (-23254.604) (-23290.219) (-23271.316) \* [-23220.222] (-23301.686) (-23257.807) (-23294.638) -- 3:54:02  
608000 -- [-23221.763] (-23250.232) (-23288.901) (-23268.747) \* [-23219.797] (-23308.644) (-23249.203) (-23294.330) -- 3:53:44  
608500 -- [-23211.216] (-23242.099) (-23278.221) (-23289.031) \* [-23216.349] (-23304.115) (-23272.233) (-23283.643) -- 3:53:26  
609000 -- [-23207.138] (-23249.092) (-23270.546) (-23300.443) \* [-23218.035] (-23284.957) (-23274.409) (-23264.201) -- 3:53:08  
609500 -- (-23230.014) [-23256.988] (-23275.053) (-23312.397) \* (-23211.724) (-23284.119) (-23290.724) [-23269.142] -- 3:52:50  
610000 -- [-23238.184] (-23265.597) (-23266.860) (-23305.681) \* [-23216.494] (-23289.435) (-23292.241) (-23286.614) -- 3:52:31

Average standard deviation of split frequencies: 0.020955

610500 -- [-23253.162] (-23265.958) (-23284.710) (-23323.832) \* [-23226.494] (-23316.330) (-23269.976) (-23254.059) -- 3:52:13  
611000 -- [-23237.642] (-23264.168) (-23288.282) (-23303.942) \* [-23220.413] (-23289.378) (-23293.777) (-23251.068) -- 3:51:56  
611500 -- [-23241.652] (-23254.982) (-23296.865) (-23290.766) \* [-23212.978] (-23316.246) (-23287.298) (-23246.224) -- 3:51:37  
612000 -- (-23249.006) [-23252.259] (-23290.638) (-23277.146) \* [-23225.386] (-23312.955) (-23286.486) (-23263.404) -- 3:51:19  
612500 -- (-23258.430) [-23251.493] (-23270.643) (-23272.432) \* [-23221.336] (-23317.036) (-23271.990) (-23268.437) -- 3:51:02  
613000 -- (-23257.528) [-23233.435] (-23278.193) (-23281.131) \* [-23233.433] (-23311.412) (-23287.185) (-23271.386) -- 3:50:44  
613500 -- (-23269.830) [-23225.640] (-23302.517) (-23291.166) \* [-23215.579] (-23301.761) (-23281.942) (-23272.536) -- 3:50:26  
614000 -- (-23294.254) [-23225.144] (-23313.598) (-23300.257) \* [-23224.744] (-23291.670) (-23276.232) (-23250.010) -- 3:50:08  
614500 -- (-23270.496) [-23241.642] (-23319.593) (-23312.636) \* (-23227.192) (-23279.980) (-23279.799) [-23246.665] -- 3:49:50  
615000 -- (-23273.526) [-23236.717] (-23288.969) (-23320.627) \* [-23235.290] (-23294.649) (-23263.648) (-23267.069) -- 3:49:32

Average standard deviation of split frequencies: 0.020711

615500 -- (-23280.046) [-23259.227] (-23285.007) (-23313.145) \* [-23241.438] (-23308.671) (-23265.208) (-23258.141) -- 3:49:15  
616000 -- (-23271.976) [-23248.190] (-23296.088) (-23291.151) \* (-23246.225) (-23302.283) (-23295.791) [-23248.995] -- 3:48:57  
616500 -- (-23270.407) [-23250.230] (-23301.133) (-23298.433) \* [-23243.925] (-23311.427) (-23289.104) (-23244.600) -- 3:48:39  
617000 -- (-23260.823) [-23251.737] (-23308.419) (-23301.183) \* [-23226.903] (-23298.027) (-23293.357) (-23241.815) -- 3:48:21  
617500 -- [-23268.951] (-23259.483) (-23309.814) (-23303.802) \* [-23230.397] (-23289.311) (-23280.430) [-23269.990] -- 3:48:03  
618000 -- (-23264.770) [-23279.154] (-23325.197) (-23299.655) \* [-23277.871] (-23295.029) (-23306.482) (-23262.889) -- 3:47:46  
618500 -- (-23252.074) [-23282.961] (-23308.622) (-23308.061) \* [-23229.766] (-23321.752) (-23298.282) (-23262.552) -- 3:47:28  
619000 -- [-23244.479] (-23262.838) (-23312.793) (-23290.521) \* [-23229.115] (-23324.488) (-23295.796) (-23262.746) -- 3:47:10  
619500 -- (-23255.710) [-23249.102] (-23319.632) (-23269.011) \* [-23226.485] (-23316.551) (-23291.938) (-23269.197) -- 3:46:52  
620000 -- (-23250.348) [-23242.794] (-23329.498) (-23284.110) \* [-23241.688] (-23304.736) (-23313.605) (-23262.926) -- 3:46:34

Average standard deviation of split frequencies: 0.020570

620500 -- (-23249.990) [-23246.681] (-23317.644) (-23292.939) \* [-23239.138] (-23303.687) (-23305.778) (-23260.246) -- 3:46:16  
621000 -- (-23252.695) [-23245.655] (-23331.315) (-23303.840) \* [-23223.864] (-23292.283) (-23323.756) (-23248.097) -- 3:45:59  
621500 -- (-23270.962) [-23236.525] (-23322.560) (-23308.903) \* [-23239.497] (-23299.137) (-23316.587) (-23260.610) -- 3:45:40  
622000 -- (-23258.537) [-23222.952] (-23335.573) (-23284.128) \* [-23225.541] (-23288.099) (-23296.993) [-23254.326] -- 3:45:22  
622500 -- (-23272.789) [-23212.999] (-23335.578) (-23277.306) \* [-23220.457] (-23288.128) (-23284.882) (-23240.445) -- 3:45:05  
623000 -- (-23272.793) [-23232.074] (-23317.444) (-23276.833) \* [-23240.769] (-23267.879) (-23286.258) (-23247.967) -- 3:44:46  
623500 -- (-23268.425) [-23240.083] (-23316.625) (-23308.938) \* [-23236.012] (-23266.806) (-23285.780) (-23241.611) -- 3:44:28  
624000 -- (-23249.543) [-23249.978] (-23290.023) (-23280.082) \* [-23231.281] (-23259.119) (-23291.026) (-23251.321) -- 3:44:11  
624500 -- (-23263.239) [-23243.314] (-23292.961) (-23249.713) \* [-23233.196] (-23259.046) (-23296.219) (-23247.963) -- 3:43:53  
625000 -- (-23272.186) [-23241.863] (-23296.042) (-23261.443) \* [-23218.541] (-23243.936) (-23298.406) (-23263.788) -- 3:43:36

Average standard deviation of split frequencies: 0.020462

625500 -- (-23264.851) [-23230.721] (-23298.761) (-23272.101) \* [-23214.300] (-23267.754) (-23311.655) (-23259.917) -- 3:43:17  
626000 -- (-23265.192) [-23237.585] (-23304.204) (-23285.522) \* [-23226.173] (-23284.487) (-23308.719) (-23262.628) -- 3:42:59  
626500 -- (-23276.530) [-23239.652] (-23277.749) (-23292.895) \* [-23234.651] (-23286.211) (-23327.229) (-23266.244) -- 3:42:41  
627000 -- (-23303.552) [-23240.108] (-23295.429) (-23300.631) \* [-23231.672] (-23271.293) (-23343.889) (-23273.894) -- 3:42:23  
627500 -- (-23305.146) [-23240.922] (-23307.051) (-23292.036) \* [-23244.720] (-23272.983) (-23343.470) (-23277.841) -- 3:42:05  
628000 -- (-23299.694) [-23254.401] (-23307.634) (-23288.797) \* [-23223.807] (-23274.943) (-23333.999) (-23260.143) -- 3:41:47  
628500 -- (-23313.891) [-23235.550] (-23296.545) (-23286.050) \* [-23238.595] (-23267.453) (-23342.154) (-23260.273) -- 3:41:29  
629000 -- (-23317.961) [-23225.567] (-23287.057) (-23299.960) \* (-23263.283) (-23253.443) (-23332.835) (-23264.987) -- 3:41:11  
629500 -- (-23321.866) [-23227.280] (-23278.039) (-23275.866) \* (-23275.987) (-23259.240) (-23341.826) (-23246.872) -- 3:40:53  
630000 -- (-23309.530) [-23229.419] (-23286.833) (-23306.120) \* (-23273.946) (-23251.524) (-23318.097) [-23255.648] -- 3:40:35

Average standard deviation of split frequencies: 0.020264

630500 -- (-23305.832) [-23222.319] (-23271.251) (-23295.822) \* (-23272.771) (-23262.184) (-23325.172) [-23251.870] -- 3:40:17  
631000 -- (-23294.295) [-23213.387] (-23251.049) (-23287.292) \* (-23299.192) [-23252.431] (-23319.309) (-23250.289) -- 3:39:59  
631500 -- (-23285.791) [-23217.381] (-23245.712) (-23282.357) \* (-23299.802) [-23261.416] (-23313.525) (-23249.571) -- 3:39:41  
632000 -- (-23277.128) [-23203.551] (-23242.278) (-23307.588) \* (-23308.507) [-23244.450] (-23316.609) (-23248.381) -- 3:39:23  
632500 -- (-23278.571) [-23208.246] (-23256.217) (-23315.128) \* (-23302.243) (-23254.182) (-23316.360) (-23244.514) -- 3:39:05  
633000 -- (-23265.138) [-23229.182] (-23262.135) (-23300.755) \* (-23303.694) (-23255.591) (-23320.736) [-23209.979] -- 3:38:47  
633500 -- (-23270.774) [-23235.261] (-23256.237) (-23302.738) \* (-23295.076) (-23279.372) (-23343.358) [-23198.920] -- 3:38:29  
634000 -- (-23301.909) [-23220.652] (-23253.461) (-23271.481) \* (-23280.065) (-23267.840) (-23349.385) [-23197.854] -- 3:38:11  
634500 -- (-23304.065) [-23228.277] (-23266.083) (-23284.219) \* (-23295.143) (-23258.383) (-23360.748) [-23208.475] -- 3:37:53  
635000 -- (-23298.056) [-23226.937] (-23251.196) (-23289.448) \* (-23259.952) (-23245.268) (-23346.063) [-23225.547] -- 3:37:35

Average standard deviation of split frequencies: 0.020161

635500 -- (-23294.475) (-23236.360) [-23258.237] (-23292.858) \* (-23263.862) (-23253.471) (-23339.267) [-23250.159] -- 3:37:17  
636000 -- (-23296.107) [-23231.790] (-23286.996) (-23279.197) \* (-23273.444) (-23258.893) (-23320.866) [-23252.559] -- 3:36:59  
636500 -- (-23290.402) (-23236.236) [-23281.996] (-23293.162) \* (-23267.204) (-23253.245) (-23316.736) [-23239.742] -- 3:36:42  
637000 -- (-23282.784) [-23225.874] (-23265.960) (-23288.353) \* (-23270.773) (-23263.333) (-23301.344) [-23261.621] -- 3:36:24  
637500 -- (-23278.431) [-23240.030] (-23258.756) (-23282.844) \* (-23267.202) (-23280.125) (-23291.552) [-23242.313] -- 3:36:05  
638000 -- (-23275.835) [-23251.897] [-23261.940] (-23294.428) \* [-23255.856] (-23304.919) (-23278.051) [-23259.599] -- 3:35:48  
638500 -- (-23280.088) [-23243.662] (-23268.002) (-23302.142) \* [-23246.545] (-23286.743) (-23296.431) (-23258.935) -- 3:35:30  
639000 -- (-23276.515) [-23247.890] (-23268.095) (-23309.818) \* [-23224.368] (-23289.575) (-23288.838) (-23250.984) -- 3:35:12  
639500 -- (-23313.865) [-23223.987] (-23273.847) (-23312.726) \* (-23239.127) (-23281.573) (-23304.966) [-23235.935] -- 3:34:54  
640000 -- (-23289.262) [-23224.079] (-23286.576) (-23308.247) \* [-23235.977] (-23287.058) (-23330.578) (-23244.945) -- 3:34:36

Average standard deviation of split frequencies: 0.019791

640500 -- (-23286.957) [-23228.634] (-23282.396) (-23311.874) \* (-23254.636) (-23276.367) (-23342.576) [-23223.181] -- 3:34:18  
641000 -- (-23276.017) [-23222.067] (-23278.348) (-23306.110) \* (-23243.998) (-23283.111) (-23358.738) [-23219.114] -- 3:34:00  
641500 -- (-23273.707) [-23221.190] (-23272.851) (-23299.479) \* (-23230.985) (-23290.721) (-23324.775) [-23222.026] -- 3:33:42  
642000 -- (-23272.235) [-23233.475] (-23275.761) (-23277.651) \* (-23233.062) (-23315.737) (-23333.166) [-23218.151] -- 3:33:24  
642500 -- (-23266.651) [-23245.255] (-23294.350) (-23274.064) \* [-23226.227] (-23305.510) (-23352.935) (-23233.001) -- 3:33:06  
643000 -- (-23276.025) [-23241.214] (-23275.393) (-23295.485) \* (-23242.676) (-23297.270) (-23359.567) [-23222.593] -- 3:32:48  
643500 -- (-23293.930) (-23244.583) [-23262.895] (-23313.126) \* (-23245.471) (-23277.889) (-23329.877) [-23216.448] -- 3:32:30

644000 -- (-23304.971) [-23238.391] (-23277.099) (-23301.640) \* (-23266.016) (-23280.090) (-23326.773) [-23220.294] -- 3:32:12  
644500 -- (-23302.695) [-23239.187] (-23252.766) (-23302.260) \* (-23245.073) (-23271.394) (-23320.572) [-23239.177] -- 3:31:54  
645000 -- (-23297.408) [-23240.319] (-23253.369) (-23296.691) \* (-23253.013) (-23269.970) (-23315.941) [-23226.601] -- 3:31:35

Average standard deviation of split frequencies: 0.019461

645500 -- (-23322.041) (-23245.617) [-23235.539] (-23293.707) \* (-23265.870) (-23260.913) (-23319.544) [-23221.749] -- 3:31:17  
646000 -- (-23297.865) (-23254.398) [-23227.648] (-23282.518) \* (-23272.318) (-23270.502) (-23316.124) [-23237.501] -- 3:30:59  
646500 -- (-23291.267) (-23258.437) [-23231.945] (-23273.765) \* (-23262.521) (-23245.776) (-23331.818) [-23252.988] -- 3:30:41  
647000 -- (-23296.311) (-23274.461) [-23249.848] [-23253.872] \* (-23280.327) (-23263.700) (-23344.013) [-23232.549] -- 3:30:23  
647500 -- (-23269.080) (-23273.764) [-23257.568] (-23248.881) \* (-23286.574) (-23253.002) (-23340.813) [-23246.987] -- 3:30:05  
648000 -- (-23272.454) (-23274.936) [-23255.171] (-23246.269) \* (-23289.462) (-23267.204) (-23344.335) [-23228.426] -- 3:29:47  
648500 -- (-23252.101) (-23272.297) [-23267.402] (-23262.228) \* (-23275.741) (-23267.263) (-23364.253) [-23236.856] -- 3:29:29  
649000 -- (-23273.152) (-23257.070) [-23259.880] (-23256.507) \* (-23296.249) (-23260.854) (-23348.658) [-23232.337] -- 3:29:12  
649500 -- (-23272.232) [-23238.069] (-23247.649) (-23245.689) \* (-23274.840) (-23274.097) (-23337.231) [-23230.589] -- 3:28:54  
650000 -- (-23261.431) (-23259.384) [-23244.116] (-23256.173) \* (-23267.036) (-23273.042) (-23316.755) [-23255.827] -- 3:28:37

Average standard deviation of split frequencies: 0.019319

650500 -- (-23282.444) (-23275.256) [-23245.842] (-23266.614) \* (-23269.119) (-23278.885) (-23322.564) [-23258.534] -- 3:28:19  
651000 -- (-23264.145) (-23278.234) [-23248.165] (-23296.691) \* (-23274.845) (-23283.081) (-23318.620) [-23262.089] -- 3:28:01  
651500 -- (-23261.849) (-23270.524) [-23243.198] (-23299.524) \* (-23266.161) (-23291.861) (-23344.479) [-23253.740] -- 3:27:44  
652000 -- (-23259.256) (-23267.941) [-23244.145] (-23308.994) \* (-23259.336) (-23278.939) (-23339.648) [-23254.064] -- 3:27:26  
652500 -- (-23248.568) (-23276.030) [-23217.421] (-23313.825) \* (-23250.093) (-23273.019) (-23335.115) [-23276.277] -- 3:27:09  
653000 -- (-23246.747) (-23262.303) [-23224.251] (-23283.252) \* (-23249.594) (-23270.615) (-23350.531) [-23261.182] -- 3:26:52  
653500 -- (-23255.854) (-23264.790) [-23239.084] (-23300.931) \* (-23257.089) (-23267.510) (-23335.152) [-23267.918] -- 3:26:34  
654000 -- (-23257.382) [-23258.835] [-23243.278] (-23308.907) \* (-23253.878) (-23258.888) (-23317.232) [-23248.557] -- 3:26:17  
654500 -- (-23255.365) (-23249.112) [-23239.303] (-23313.708) \* (-23242.417) (-23270.696) (-23316.097) [-23251.583] -- 3:26:00  
655000 -- (-23250.733) [-23234.862] [-23241.195] (-23299.757) \* (-23242.653) (-23284.663) (-23302.981) [-23244.311] -- 3:25:43

Average standard deviation of split frequencies: 0.019603

655500 -- (-23246.438) (-23248.855) [-23237.673] (-23297.382) \* (-23254.504) (-23282.107) (-23290.615) [-23233.802] -- 3:25:26  
656000 -- (-23254.723) (-23245.855) [-23236.475] (-23304.294) \* (-23257.375) (-23278.157) (-23295.349) [-23247.050] -- 3:25:09  
656500 -- (-23268.076) [-23238.321] [-23247.975] (-23283.039) \* (-23258.859) (-23264.150) (-23313.509) [-23238.722] -- 3:24:51  
657000 -- (-23253.882) (-23271.904) [-23236.040] (-23293.612) \* (-23242.990) (-23273.558) (-23286.436) [-23249.913] -- 3:24:33  
657500 -- (-23261.645) (-23277.966) [-23226.572] (-23289.781) \* (-23244.304) (-23257.475) (-23300.334) [-23253.290] -- 3:24:16  
658000 -- (-23258.962) (-23278.372) [-23239.315] (-23301.479) \* (-23247.552) (-23273.900) (-23308.022) [-23258.867] -- 3:23:57  
658500 -- (-23269.939) (-23272.691) [-23238.761] (-23301.118) \* (-23253.395) (-23273.110) (-23314.221) [-23261.853] -- 3:23:39  
659000 -- (-23262.267) (-23270.048) [-23239.524] (-23317.485) \* (-23241.483) (-23279.751) (-23284.392) [-23242.200] -- 3:23:22  
659500 -- (-23284.708) (-23268.460) [-23246.704] (-23317.697) \* (-23237.269) (-23273.546) (-23293.717) [-23233.406] -- 3:23:04  
660000 -- (-23300.084) (-23256.914) [-23258.379] (-23319.397) \* (-23238.076) (-23289.171) (-23301.703) [-23233.330] -- 3:22:46

Average standard deviation of split frequencies: 0.019665

660500 -- (-23282.604) [-23256.719] (-23255.640) (-23313.490) \* (-23230.934) (-23277.733) (-23326.177) [-23237.779] -- 3:22:28  
661000 -- (-23277.150) (-23272.247) (-23265.473) (-23311.117) \* (-23224.457) (-23292.577) (-23317.127) [-23242.984] -- 3:22:10  
661500 -- (-23258.076) (-23265.706) (-23243.376) (-23305.453) \* (-23223.128) (-23280.772) (-23325.124) [-23263.478] -- 3:21:52  
662000 -- (-23255.076) (-23274.598) (-23229.134) (-23317.195) \* (-23217.503) (-23265.661) (-23314.819) [-23283.349] -- 3:21:34  
662500 -- (-23252.593) (-23310.934) [-23237.188] (-23315.129) \* (-23216.292) (-23306.194) (-23312.053) [-23284.433] -- 3:21:16  
663000 -- (-23253.738) (-23305.986) [-23247.796] (-23303.110) \* (-23233.011) (-23304.414) (-23296.925) [-23284.098] -- 3:20:57  
663500 -- (-23262.292) (-23317.608) [-23253.888] (-23305.587) \* (-23233.075) (-23303.879) (-23280.964) [-23279.204] -- 3:20:39  
664000 -- (-23256.217) (-23319.925) [-23265.904] (-23286.868) \* (-23224.982) (-23304.230) (-23263.983) [-23291.424] -- 3:20:21  
664500 -- (-23255.973) (-23319.017) [-23259.960] (-23310.029) \* (-23245.467) (-23302.918) (-23268.031) [-23275.194] -- 3:20:03  
665000 -- (-23246.931) (-23301.469) [-23256.516] (-23306.368) \* (-23253.732) (-23294.348) (-23277.861) [-23313.623] -- 3:19:45

Average standard deviation of split frequencies: 0.019632

665500 -- (-23246.770) (-23299.580) (-23264.608) (-23285.436) \* (-23248.188) (-23292.181) (-23280.962) [-23314.888] -- 3:19:27  
666000 -- (-23245.758) (-23291.202) (-23270.556) (-23312.426) \* (-23247.522) (-23305.864) (-23274.300) [-23320.984] -- 3:19:09  
666500 -- (-23227.566) (-23272.834) (-23277.452) (-23309.017) \* (-23264.160) (-23296.058) (-23273.847) [-23297.972] -- 3:18:52  
667000 -- (-23228.189) (-23275.972) (-23274.969) (-23300.839) \* (-23268.319) (-23297.113) [-23272.133] [-23295.961] -- 3:18:34  
667500 -- (-23230.186) (-23278.456) (-23250.846) (-23316.516) \* (-23277.148) (-23284.041) [-23263.939] [-23281.194] -- 3:18:16  
668000 -- (-23226.605) (-23282.025) (-23249.650) (-23332.469) \* (-23277.093) (-23293.301) [-23254.180] [-23275.583] -- 3:17:59  
668500 -- (-23229.566) (-23286.548) (-23280.907) (-23329.482) \* (-23289.115) (-23309.141) [-23268.242] [-23278.042] -- 3:17:41  
669000 -- (-23225.816) (-23293.382) (-23276.228) (-23329.545) \* (-23263.072) (-23303.871) [-23263.247] [-23279.210] -- 3:17:24  
669500 -- (-23229.345) (-23304.520) (-23269.499) (-23312.887) \* (-23240.899) (-23301.786) [-23248.530] [-23268.161] -- 3:17:06  
670000 -- (-23226.774) (-23283.835) (-23259.559) (-23308.425) \* (-23243.794) (-23301.235) (-23251.424) [-23267.889] -- 3:16:49

Average standard deviation of split frequencies: 0.019411

670500 -- (-23227.999) (-23278.524) (-23265.247) (-23306.725) \* (-23240.398) (-23285.733) (-23282.816) [-23271.645] -- 3:16:31  
671000 -- (-23222.717) (-23267.336) (-23268.448) (-23314.119) \* (-23249.649) (-23300.096) (-23268.834) [-23283.350] -- 3:16:13  
671500 -- (-23221.481) (-23281.641) (-23277.942) (-23308.612) \* (-23244.847) (-23308.057) (-23279.976) [-23278.896] -- 3:15:55  
672000 -- (-23230.365) (-23294.252) [-23269.512] (-23276.004) \* (-23242.824) (-23321.538) (-23283.819) [-23278.259] -- 3:15:36  
672500 -- (-23228.096) (-23324.015) (-23268.296) (-23274.109) \* (-23236.560) (-23296.812) [-23265.276] [-23280.887] -- 3:15:18  
673000 -- (-23239.004) (-23330.926) (-23278.906) (-23280.933) \* (-23251.941) (-23306.876) [-23245.027] [-23282.520] -- 3:15:00  
673500 -- (-23233.610) (-23296.794) (-23289.571) (-23287.799) \* (-23254.761) (-23328.092) (-23249.973) [-23296.425] -- 3:14:42  
674000 -- (-23230.533) (-23302.638) (-23277.260) (-23307.396) \* (-23263.223) (-23348.364) (-23247.830) [-23306.308] -- 3:14:24  
674500 -- (-23209.321) (-23305.320) (-23284.600) (-23297.232) \* (-23260.808) (-23335.914) (-23257.634) [-23287.528] -- 3:14:06  
675000 -- (-23223.682) (-23299.586) (-23281.108) (-23281.774) \* (-23239.873) (-23334.807) (-23256.886) [-23286.086] -- 3:13:49

Average standard deviation of split frequencies: 0.018933

675500 -- (-23236.253) (-23303.571) (-23269.491) (-23300.402) \* (-23226.873) (-23320.132) (-23256.898) [-23282.474] -- 3:13:30  
676000 -- (-23228.756) (-23290.266) (-23254.207) (-23289.322) \* (-23224.362) (-23339.657) (-23266.837) [-23304.246] -- 3:13:13  
676500 -- (-23229.608) (-23293.556) (-23258.792) (-23277.441) \* (-23220.094) (-23323.883) (-23266.152) [-23299.215] -- 3:12:55  
677000 -- (-23241.843) (-23272.621) [-23262.662] (-23273.054) \* (-23212.283) (-23305.609) (-23305.893) [-23316.002] -- 3:12:37  
677500 -- (-23240.003) (-23282.038) [-23260.350] (-23250.905) \* (-23211.123) (-23307.691) (-23303.323) [-23334.981] -- 3:12:19  
678000 -- (-23238.611) (-23284.133) (-23276.898) (-23260.708) \* (-23216.970) (-23315.591) (-23309.724) [-23332.402] -- 3:12:01  
678500 -- (-23244.608) (-23288.754) (-23306.241) (-23269.683) \* (-23226.318) (-23316.035) (-23303.543) [-23319.930] -- 3:11:42  
679000 -- (-23224.630) (-23279.349) (-23294.436) (-23257.097) \* (-23239.498) (-23314.832) (-23302.051) [-23330.840] -- 3:11:24  
679500 -- (-23234.829) (-23269.637) (-23285.565) (-23239.232) \* (-23231.231) (-23298.484) (-23286.559) [-23333.086] -- 3:11:06  
680000 -- (-23238.838) (-23280.833) (-23307.911) [-23226.772] \* (-23246.338) (-23299.388) (-23276.553) [-23313.925] -- 3:10:48

Average standard deviation of split frequencies: 0.018598

680500 -- (-23244.942) (-23290.138) (-23296.936) (-23248.548) \* (-23248.071) (-23282.080) (-23280.911) [-23339.444] -- 3:10:30  
681000 -- (-23245.376) (-23292.320) (-23297.536) [-23227.899] \* (-23236.417) (-23281.773) (-23276.303) [-23333.644] -- 3:10:12  
681500 -- (-23227.680) (-23281.481) (-23286.377) [-23225.709] \* (-23231.164) (-23279.475) (-23286.545) [-23335.025] -- 3:09:54  
682000 -- (-23248.954) (-23281.014) (-23282.144) [-23206.507] \* (-23248.785) (-23291.105) (-23279.870) [-23330.760] -- 3:09:36  
682500 -- (-23270.411) (-23285.990) (-23300.033) [-23213.100] \* (-23244.581) (-23278.381) (-23273.765) [-23314.380] -- 3:09:18  
683000 -- (-23268.694) (-23284.305) (-23297.469) [-23200.940] \* (-23256.637) (-23281.839) (-23280.073) [-23319.750] -- 3:09:00  
683500 -- (-23256.658) (-23283.280) (-23303.961) [-23214.697] \* (-23271.546) (-23278.140) (-23276.111) [-23348.515] -- 3:08:42  
684000 -- (-23269.129) (-23270.319) (-23315.146) [-23228.532] \* (-23258.606) (-23282.662) (-23286.024) [-23331.724] -- 3:08:24  
684500 -- (-23272.033) (-23281.175) (-23317.479) [-23227.609] \* (-23241.760) (-23267.634) (-23305.442) [-23313.628] -- 3:08:06  
685000 -- (-23266.406) (-23278.934) (-23335.792) [-23225.055] \* (-23248.905) (-23259.688) (-23291.638) [-23298.304] -- 3:07:47

Average standard deviation of split frequencies: 0.018299

|        |    |              |              |              |               |   |              |              |              |              |    |         |
|--------|----|--------------|--------------|--------------|---------------|---|--------------|--------------|--------------|--------------|----|---------|
| 685500 | -- | (-23286.489) | (-23255.429) | (-23317.072) | [ -23204.840] | * | (-23258.898) | (-23248.669) | (-23293.860) | (-23306.635) | -- | 3:07:29 |
| 686000 | -- | (-23282.333) | (-23266.889) | (-23330.948) | [ -23221.342] | * | (-23242.450) | (-23240.097) | (-23296.413) | (-23302.180) | -- | 3:07:11 |
| 686500 | -- | (-23277.324) | (-23285.753) | (-23353.329) | [ -23230.965] | * | (-23226.751) | (-23263.243) | (-23267.073) | (-23299.761) | -- | 3:06:53 |
| 687000 | -- | (-23270.519) | (-23296.174) | (-23352.132) | [ -23231.403] | * | (-23237.035) | (-23259.236) | (-23272.592) | (-23282.618) | -- | 3:06:35 |
| 687500 | -- | (-23263.019) | (-23273.728) | (-23333.226) | [ -23237.965] | * | (-23251.139) | (-23259.540) | (-23290.792) | (-23274.465) | -- | 3:06:17 |
| 688000 | -- | (-23265.589) | (-23272.597) | (-23323.582) | [ -23242.834] | * | (-23234.629) | (-23256.047) | (-23274.673) | (-23299.426) | -- | 3:05:58 |
| 688500 | -- | (-23275.419) | (-23244.354) | (-23316.085) | (-23268.375)  | * | (-23238.153) | (-23271.807) | (-23261.515) | (-23302.285) | -- | 3:05:40 |
| 689000 | -- | (-23287.140) | (-23256.108) | (-23305.113) | (-23264.463)  | * | (-23222.916) | (-23255.261) | (-23267.666) | (-23322.438) | -- | 3:05:22 |
| 689500 | -- | (-23302.416) | (-23262.976) | (-23293.878) | [ -23257.607] | * | (-23223.288) | (-23264.812) | (-23268.873) | (-23330.250) | -- | 3:05:04 |
| 690000 | -- | (-23296.350) | (-23270.654) | (-23311.836) | [ -23256.107] | * | (-23227.440) | (-23257.037) | (-23277.255) | (-23314.779) | -- | 3:04:45 |

Average standard deviation of split frequencies: 0.018200

|        |    |              |              |              |               |   |              |              |              |              |    |         |
|--------|----|--------------|--------------|--------------|---------------|---|--------------|--------------|--------------|--------------|----|---------|
| 690500 | -- | (-23292.002) | (-23278.345) | (-23316.680) | [ -23260.366] | * | (-23229.967) | (-23263.616) | (-23271.755) | (-23324.011) | -- | 3:04:27 |
| 691000 | -- | (-23297.018) | (-23285.980) | (-23326.575) | [ -23239.824] | * | (-23242.101) | (-23263.985) | (-23278.508) | (-23291.875) | -- | 3:04:09 |
| 691500 | -- | (-23303.984) | (-23274.531) | (-23311.433) | [ -23224.128] | * | (-23244.210) | (-23248.323) | (-23281.545) | (-23283.434) | -- | 3:03:51 |
| 692000 | -- | (-23298.825) | (-23279.064) | (-23302.476) | [ -23248.145] | * | (-23236.309) | (-23242.228) | (-23291.089) | (-23296.201) | -- | 3:03:33 |
| 692500 | -- | (-23310.242) | (-23272.908) | (-23301.618) | [ -23253.360] | * | (-23243.521) | (-23253.881) | (-23306.173) | (-23301.550) | -- | 3:03:15 |
| 693000 | -- | (-23295.334) | (-23260.109) | (-23305.712) | [ -23246.654] | * | (-23252.926) | (-23266.485) | (-23309.436) | (-23312.873) | -- | 3:02:57 |
| 693500 | -- | (-23276.823) | (-23271.379) | (-23311.145) | [ -23248.339] | * | (-23259.810) | (-23280.149) | (-23284.923) | (-23314.726) | -- | 3:02:39 |
| 694000 | -- | (-23270.915) | (-23262.065) | (-23283.767) | [ -23231.802] | * | (-23269.841) | (-23251.508) | (-23283.345) | (-23319.986) | -- | 3:02:21 |
| 694500 | -- | (-23317.449) | (-23253.427) | (-23288.330) | [ -23239.938] | * | (-23266.717) | (-23219.523) | (-23265.306) | (-23323.022) | -- | 3:02:03 |
| 695000 | -- | (-23314.240) | (-23222.758) | (-23285.296) | [ -23234.552] | * | (-23273.470) | (-23222.493) | (-23259.208) | (-23321.817) | -- | 3:01:45 |

Average standard deviation of split frequencies: 0.017985

|        |    |              |               |              |              |   |              |               |              |              |    |         |
|--------|----|--------------|---------------|--------------|--------------|---|--------------|---------------|--------------|--------------|----|---------|
| 695500 | -- | (-23298.934) | [ -23217.696] | (-23286.451) | (-23241.286) | * | (-23253.899) | [ -23223.653] | (-23270.631) | (-23310.197) | -- | 3:01:27 |
| 696000 | -- | (-23312.095) | [ -23228.275] | (-23290.585) | (-23257.066) | * | (-23267.920) | [ -23215.033] | (-23259.900) | (-23321.833) | -- | 3:01:09 |
| 696500 | -- | (-23306.584) | [ -23225.252] | (-23278.466) | (-23263.891) | * | (-23263.285) | [ -23215.693] | (-23249.379) | (-23321.270) | -- | 3:00:52 |
| 697000 | -- | (-23302.373) | [ -23226.865] | (-23283.458) | (-23269.957) | * | (-23278.781) | [ -23219.644] | (-23247.701) | (-23302.314) | -- | 3:00:34 |
| 697500 | -- | (-23294.297) | [ -23218.558] | (-23255.733) | (-23275.467) | * | (-23269.180) | [ -23206.081] | (-23242.526) | (-23298.056) | -- | 3:00:16 |
| 698000 | -- | (-23300.222) | [ -23227.903] | (-23247.908) | (-23273.430) | * | (-23265.375) | [ -23218.733] | (-23265.965) | (-23277.668) | -- | 2:59:58 |
| 698500 | -- | (-23303.051) | [ -23217.134] | (-23248.774) | (-23261.924) | * | (-23278.129) | [ -23234.160] | (-23243.964) | (-23279.978) | -- | 2:59:41 |
| 699000 | -- | (-23336.945) | [ -23209.286] | (-23252.026) | (-23259.446) | * | (-23302.432) | [ -23243.264] | (-23240.164) | (-23287.210) | -- | 2:59:23 |
| 699500 | -- | (-23330.842) | [ -23228.972] | (-23263.062) | (-23259.228) | * | (-23308.290) | [ -23250.564] | (-23244.435) | (-23292.813) | -- | 2:59:05 |
| 700000 | -- | (-23321.076) | [ -23225.006] | (-23276.809) | (-23258.634) | * | (-23312.282) | [ -23253.042] | (-23254.922) | (-23283.192) | -- | 2:58:47 |

Average standard deviation of split frequencies: 0.017815

|        |    |              |               |              |              |   |              |               |              |              |    |         |
|--------|----|--------------|---------------|--------------|--------------|---|--------------|---------------|--------------|--------------|----|---------|
| 700500 | -- | (-23323.538) | [ -23215.584] | (-23282.647) | (-23267.951) | * | (-23306.460) | [ -23257.086] | (-23249.360) | (-23293.926) | -- | 2:58:30 |
| 701000 | -- | (-23329.233) | [ -23222.462] | (-23280.962) | (-23289.398) | * | (-23285.725) | [ -23257.530] | (-23269.632) | (-23286.763) | -- | 2:58:12 |
| 701500 | -- | (-23336.716) | [ -23238.382] | (-23258.140) | (-23277.810) | * | (-23293.852) | [ -23264.034] | (-23277.779) | (-23298.640) | -- | 2:57:54 |
| 702000 | -- | (-23315.834) | [ -23240.944] | (-23256.039) | (-23293.988) | * | (-23275.578) | [ -23243.777] | (-23291.853) | (-23287.771) | -- | 2:57:37 |
| 702500 | -- | (-23305.839) | [ -23260.778] | (-23240.487) | (-23295.682) | * | (-23263.518) | [ -23248.139] | (-23288.001) | (-23291.146) | -- | 2:57:19 |
| 703000 | -- | (-23302.235) | [ -23254.535] | (-23243.306) | (-23317.109) | * | (-23257.912) | [ -23246.235] | (-23309.717) | (-23291.211) | -- | 2:57:01 |
| 703500 | -- | (-23308.897) | [ -23247.743] | (-23242.725) | (-23326.308) | * | (-23255.422) | [ -23234.726] | (-23307.002) | (-23284.292) | -- | 2:56:43 |
| 704000 | -- | (-23313.226) | [ -23247.500] | (-23253.506) | (-23309.298) | * | (-23245.660) | [ -23238.485] | (-23296.424) | (-23294.334) | -- | 2:56:25 |
| 704500 | -- | (-23332.105) | [ -23251.949] | (-23242.040) | (-23316.335) | * | (-23241.673) | [ -23250.858] | (-23288.887) | (-23286.424) | -- | 2:56:07 |
| 705000 | -- | (-23339.600) | [ -23258.350] | (-23263.490) | (-23290.195) | * | (-23249.763] | [ -23258.699] | (-23303.668) | (-23291.002) | -- | 2:55:49 |

Average standard deviation of split frequencies: 0.017880

|        |    |              |               |               |              |   |              |               |              |              |    |         |
|--------|----|--------------|---------------|---------------|--------------|---|--------------|---------------|--------------|--------------|----|---------|
| 705500 | -- | (-23315.458) | [ -23255.720] | (-23292.255)  | (-23306.059) | * | (-23258.490) | [ -23237.305] | (-23305.714) | (-23284.224) | -- | 2:55:31 |
| 706000 | -- | (-23291.688) | [ -23263.234] | (-23273.291)  | (-23307.002) | * | (-23257.934) | [ -23227.761] | (-23309.612) | (-23285.820) | -- | 2:55:13 |
| 706500 | -- | (-23302.611) | [ -23251.927] | (-23265.840)  | (-23311.073) | * | (-23251.743) | [ -23220.938] | (-23304.874) | (-23298.608) | -- | 2:54:56 |
| 707000 | -- | (-23307.898) | [ -23279.237] | (-23280.858)  | (-23332.470) | * | (-23255.999) | [ -23231.526] | (-23292.190) | (-23293.323) | -- | 2:54:38 |
| 707500 | -- | (-23308.893) | [ -23246.658] | (-23289.218)  | (-23340.736) | * | (-23262.826) | [ -23236.795] | (-23297.712) | (-23290.348) | -- | 2:54:20 |
| 708000 | -- | (-23287.289) | [ -23261.987] | (-23298.889)  | (-23314.459) | * | (-23277.041) | [ -23242.404] | (-23296.488) | (-23292.600) | -- | 2:54:03 |
| 708500 | -- | (-23286.691) | [ -23260.837] | (-23291.726)  | (-23314.695) | * | (-23291.240) | [ -23235.107] | (-23291.425) | (-23279.438) | -- | 2:53:45 |
| 709000 | -- | (-23280.647) | [ -23265.608] | (-23278.739)  | (-23332.580) | * | (-23306.807) | [ -23232.849] | (-23292.456) | (-23277.508) | -- | 2:53:27 |
| 709500 | -- | (-23285.960) | [ -23272.557] | (-23258.634)  | (-23326.212) | * | (-23300.699) | [ -23229.671] | (-23298.473) | (-23276.389) | -- | 2:53:09 |
| 710000 | -- | (-23282.819) | [ -23281.569] | [ -23245.464] | (-23314.337) | * | (-23309.057) | [ -23235.720] | (-23291.723) | (-23282.053) | -- | 2:52:51 |

Average standard deviation of split frequencies: 0.017853

|        |    |               |               |               |               |   |              |               |              |               |    |         |
|--------|----|---------------|---------------|---------------|---------------|---|--------------|---------------|--------------|---------------|----|---------|
| 710500 | -- | (-23289.732)  | [ -23269.492] | [ -23244.807] | (-23283.465)  | * | (-23301.021) | [ -23229.321] | (-23277.256) | (-23294.968)  | -- | 2:52:33 |
| 711000 | -- | (-23288.312)  | [ -23270.332] | [ -23239.675] | (-23301.529)  | * | (-23305.624) | [ -23221.713] | (-23274.953) | (-23275.837)  | -- | 2:52:16 |
| 711500 | -- | (-23308.157)  | [ -23269.899] | [ -23232.567] | (-23310.406)  | * | (-23306.162) | [ -23219.203] | (-23278.545) | [ -23258.788] | -- | 2:51:58 |
| 712000 | -- | (-23308.805)  | [ -23269.323] | [ -23260.185] | (-23290.665)  | * | (-23295.437) | [ -23220.183] | (-23277.712) | (-23253.952)  | -- | 2:51:40 |
| 712500 | -- | (-23276.272)  | [ -23280.708] | [ -23259.291] | (-23326.323)  | * | (-23320.980) | [ -23222.747] | (-23274.269) | (-23237.706)  | -- | 2:51:22 |
| 713000 | -- | (-23257.387)  | [ -23266.281] | [ -23257.359] | (-23336.408)  | * | (-23321.437) | [ -23231.314] | (-23291.946) | (-23238.564)  | -- | 2:51:04 |
| 713500 | -- | [ -23259.216] | [ -23265.169] | [ -23262.887] | (-23340.519)  | * | (-23307.876) | [ -23228.948] | (-23291.816) | (-23233.421)  | -- | 2:50:46 |
| 714000 | -- | (-23249.219)  | [ -23255.317] | [ -23249.552] | [ -23335.622] | * | (-23299.417) | [ -23211.340] | (-23303.328) | (-23235.178)  | -- | 2:50:29 |
| 714500 | -- | (-23270.627)  | [ -23242.473] | [ -23255.090] | (-23339.550)  | * | (-23289.780) | [ -23227.125] | (-23296.388) | (-23253.670)  | -- | 2:50:11 |
| 715000 | -- | (-23270.635)  | [ -23238.282] | [ -23263.826] | (-23314.954)  | * | (-23268.109) | [ -23239.262] | (-23300.953) | (-23269.550)  | -- | 2:49:53 |

Average standard deviation of split frequencies: 0.017919

|        |    |               |               |               |              |   |              |               |              |               |    |         |
|--------|----|---------------|---------------|---------------|--------------|---|--------------|---------------|--------------|---------------|----|---------|
| 715500 | -- | (-23254.979)  | [ -23249.102] | (-23265.686)  | (-23293.832) | * | (-23270.530) | [ -23245.822] | (-23295.391) | (-23270.486)  | -- | 2:49:35 |
| 716000 | -- | [ -23258.337] | [ -23239.124] | [ -23274.898] | (-23303.543) | * | (-23292.411) | [ -23239.150] | (-23297.758) | (-23259.896)  | -- | 2:49:17 |
| 716500 | -- | (-23253.053)  | [ -23250.286] | [ -23275.653] | (-23312.095) | * | (-23264.298) | [ -23231.130] | (-23297.287) | (-23263.132)  | -- | 2:48:59 |
| 717000 | -- | (-23237.608)  | [ -23237.214] | [ -23269.855] | (-23308.385) | * | (-23263.933) | [ -23226.870] | (-23314.088) | (-23248.494)  | -- | 2:48:41 |
| 717500 | -- | (-23250.785)  | [ -23238.709] | [ -23295.523] | (-23316.003) | * | (-23270.478) | [ -23239.052] | (-23324.481) | [ -23239.547] | -- | 2:48:23 |
| 718000 | -- | (-23263.383)  | [ -23246.454] | [ -23296.626] | (-23314.238) | * | (-23281.402) | [ -23237.693] | (-23324.662) | (-23240.128)  | -- | 2:48:05 |
| 718500 | -- | (-23273.898)  | [ -23237.378] | [ -23283.498] | (-23324.295) | * | (-23285.934) | [ -23223.089] | (-23323.067) | [ -23231.159] | -- | 2:47:47 |
| 719000 | -- | (-23277.670)  | [ -23232.305] | [ -23299.206] | (-23337.641) | * | (-23277.936) | [ -23218.608] | (-23317.921) | (-23228.810)  | -- | 2:47:29 |
| 719500 | -- | (-23291.037)  | [ -23217.693] | [ -23292.373] | (-23320.732) | * | (-23268.265) | [ -23227.966] | (-23342.616) | (-23245.657)  | -- | 2:47:10 |
| 720000 | -- | (-23281.307)  | [ -23220.327] | (-23289.246)  | (-23319.740) | * | (-23259.567) | [ -23221.139] | (-23324.993) | (-23254.605)  | -- | 2:46:52 |

Average standard deviation of split frequencies: 0.017834

|        |    |               |               |              |              |   |              |               |              |               |    |         |
|--------|----|---------------|---------------|--------------|--------------|---|--------------|---------------|--------------|---------------|----|---------|
| 720500 | -- | (-23260.246)  | [ -23232.237] | (-23277.773) | (-23321.878) | * | (-23257.690) | [ -23226.026] | (-23315.540) | (-23239.615)  | -- | 2:46:34 |
| 721000 | -- | [ -23239.021] | [ -23258.125] | (-23290.474) | (-23333.708) | * | (-23261.711) | [ -23232.438] | (-23326.388) | [ -23231.721] | -- | 2:46:16 |
| 721500 | -- | [ -23240.361] | [ -23271.758] | (-23276.031) | (-23318.867) | * | (-23280.115) | [ -23225.625] | (-23325.325) | (-23234.827)  | -- | 2:45:58 |
| 72     |    |               |               |              |              |   |              |               |              |               |    |         |

726500 -- (-23262.842) [-23225.496] (-23276.652) (-23309.462) \* (-23281.459) [-23242.863] (-23294.976) (-23292.637) -- 2:42:59  
727000 -- (-23271.664) [-23232.738] (-23265.630) (-23326.827) \* (-23290.760) [-23240.242] (-23272.025) (-23278.957) -- 2:42:41  
727500 -- (-23273.550) [-23230.938] (-23258.658) (-23337.340) \* (-23281.843) [-23259.490] (-23265.606) (-23272.432) -- 2:42:23  
728000 -- (-23297.163) [-23228.356] (-23264.703) (-23341.275) \* (-23269.315) (-23260.894) (-23266.219) [-23253.936] -- 2:42:05  
728500 -- (-23300.657) [-23216.232] (-23280.157) (-23324.335) \* (-23291.624) [-23253.298] (-23271.323) (-23265.678) -- 2:41:47  
729000 -- (-23285.156) [-23232.639] (-23260.035) (-23329.572) \* (-23308.000) [-23247.050] (-23302.601) (-23265.015) -- 2:41:29  
729500 -- (-23265.541) [-23247.053] (-23274.724) (-23310.580) \* (-23275.864) [-23250.453] (-23308.171) (-23253.111) -- 2:41:11  
730000 -- (-23258.898) [-23263.286] (-23266.651) (-23326.029) \* (-23265.330) [-23255.773] (-23303.278) (-23266.510) -- 2:40:53

Average standard deviation of split frequencies: 0.017906

730500 -- [-23247.521] (-23259.137) (-23277.563) (-23326.737) \* (-23265.372) [-23261.707] (-23302.649) (-23273.437) -- 2:40:35  
731000 -- (-23250.305) [-23254.349] (-23261.269) (-23321.736) \* (-23267.014) [-23262.565] (-23306.556) (-23280.990) -- 2:40:17  
731500 -- [-23254.757] (-23253.062) (-23269.060) (-23337.356) \* [-23272.145] (-23275.212) (-23283.237) (-23289.609) -- 2:39:58  
732000 -- (-23268.198) (-23253.592) [-23264.753] (-23333.283) \* [-23245.511] (-23280.124) (-23293.156) (-23297.100) -- 2:39:41  
732500 -- (-23282.044) [-23242.127] (-23267.105) (-23313.084) \* [-23230.054] (-23277.767) (-23299.829) (-23297.511) -- 2:39:22  
733000 -- (-23266.399) [-23237.970] (-23248.860) (-23300.419) \* (-23232.812) (-23287.763) (-23290.697) (-23309.008) -- 2:39:04  
733500 -- (-23271.081) (-23248.726) [-23251.722] (-23303.031) \* [-23233.301] (-23301.292) (-23274.093) (-23289.548) -- 2:38:46  
734000 -- (-23266.161) (-23246.614) [-23249.510] (-23293.824) \* [-23239.604] (-23316.614) (-23271.904) (-23291.737) -- 2:38:28  
734500 -- (-23254.869) (-23252.076) [-23251.160] (-23304.016) \* [-23243.836] (-23308.760) (-23249.623) (-23290.109) -- 2:38:10  
735000 -- (-23258.702) [-23251.979] (-23264.464) (-23288.927) \* [-23237.603] (-23320.548) (-23254.137) (-23296.381) -- 2:37:52

Average standard deviation of split frequencies: 0.017743

735500 -- (-23260.967) [-23236.149] (-23273.762) (-23294.309) \* [-23244.713] (-23304.123) (-23249.531) (-23295.244) -- 2:37:34  
736000 -- (-23254.405) [-23247.990] (-23271.229) (-23296.669) \* [-23227.718] (-23298.369) (-23243.376) (-23280.024) -- 2:37:16  
736500 -- (-23272.023) [-23252.771] (-23265.706) (-23296.451) \* [-23223.993] (-23301.135) (-23250.182) (-23291.772) -- 2:36:58  
737000 -- (-23296.531) [-23250.191] (-23250.485) (-23300.124) \* [-23217.480] (-23287.269) (-23265.494) (-23283.665) -- 2:36:40  
737500 -- (-23309.209) (-23248.252) [-23238.334] (-23281.783) \* [-23228.176] (-23273.613) (-23277.129) (-23287.656) -- 2:36:22  
738000 -- (-23309.533) (-23254.266) [-23237.995] (-23300.205) \* [-23224.659] (-23301.476) (-23276.075) (-23288.387) -- 2:36:03  
738500 -- (-23296.939) (-23255.688) [-23229.776] (-23312.916) \* [-23231.957] (-23311.142) (-23286.152) (-23294.937) -- 2:35:45  
739000 -- (-23278.204) [-23249.021] (-23241.010) (-23342.187) \* [-23243.367] (-23269.095) (-23286.647) (-23286.345) -- 2:35:27  
739500 -- (-23292.240) [-23245.279] (-23254.661) (-23348.297) \* [-23261.321] (-23273.109) (-23268.248) (-23268.501) -- 2:35:09  
740000 -- (-23275.995) [-23240.123] (-23256.564) (-23356.832) \* (-23266.479) (-23300.728) [-23254.556] (-23269.165) -- 2:34:51

Average standard deviation of split frequencies: 0.017859

740500 -- (-23296.548) [-23239.658] (-23229.618) (-23321.990) \* (-23260.598) (-23274.209) [-23239.993] (-23249.172) -- 2:34:32  
741000 -- (-23300.256) [-23247.168] (-23218.980) (-23317.651) \* (-23261.809) (-23288.356) [-23212.026] (-23256.061) -- 2:34:14  
741500 -- (-23265.031) (-23256.646) [-23236.504] (-23308.315) \* (-23253.111) (-23303.480) [-23210.969] (-23269.128) -- 2:33:56  
742000 -- (-23274.059) (-23271.083) [-23251.880] (-23309.930) \* (-23273.262) (-23306.556) [-23214.070] (-23275.235) -- 2:33:38  
742500 -- (-23265.139) (-23275.870) [-23235.044] (-23294.548) \* (-23263.453) (-23297.511) [-23220.835] (-23271.811) -- 2:33:20  
743000 -- (-23273.899) (-23285.428) [-23232.010] (-23304.084) \* (-23264.427) (-23292.361) [-23227.983] (-23285.120) -- 2:33:02  
743500 -- (-23276.004) (-23287.217) [-23235.047] (-23287.528) \* (-23251.070) (-23272.934) [-23244.832] (-23279.690) -- 2:32:45  
744000 -- (-23271.576) (-23275.424) [-23231.295] (-23297.323) \* (-23276.483) (-23273.054) [-23264.335] (-23292.647) -- 2:32:27  
744500 -- (-23263.332) (-23272.297) [-23234.783] (-23311.532) \* [-23256.127] (-23268.500) (-23277.539) (-23281.419) -- 2:32:09  
745000 -- (-23293.954) (-23263.315) [-23246.817] (-23323.894) \* [-23252.324] (-23265.804) (-23283.228) (-23306.419) -- 2:31:51

Average standard deviation of split frequencies: 0.017792

745500 -- (-23285.058) (-23275.624) [-23250.256] (-23327.610) \* (-23238.407) (-23260.544) (-23286.680) (-23317.968) -- 2:31:33  
746000 -- (-23290.102) (-23284.244) [-23248.248] (-23325.732) \* [-23235.469] (-23250.172) (-23294.069) (-23315.098) -- 2:31:15  
746500 -- (-23287.239) (-23267.980) [-23273.877] (-23319.368) \* [-23236.172] (-23249.099) (-23306.606) (-23317.727) -- 2:30:57  
747000 -- (-23299.710) (-23271.273) [-23279.889] (-23331.504) \* (-23236.946) (-23240.856) (-23295.527) (-23305.691) -- 2:30:38  
747500 -- (-23289.943) (-23265.473) [-23279.856] (-23327.001) \* (-23263.903) (-23233.517) (-23300.152) (-23318.866) -- 2:30:20  
748000 -- (-23314.589) (-23260.539) [-23271.165] (-23331.476) \* (-23270.075) (-23251.614) (-23264.429) (-23327.280) -- 2:30:02  
748500 -- (-23304.271) (-23275.579) [-23261.245] (-23329.709) \* (-23252.983) (-23256.551) (-23267.859) (-23332.300) -- 2:29:45  
749000 -- (-23287.419) (-23289.905) [-23251.706] (-23314.642) \* [-23245.833] (-23260.732) (-23265.853) (-23312.495) -- 2:29:26  
749500 -- (-23300.993) (-23313.185) [-23253.335] (-23301.586) \* (-23237.446) (-23244.702) (-23275.299) (-23309.113) -- 2:29:09  
750000 -- (-23289.610) (-23320.894) [-23240.756] (-23304.338) \* [-23222.011] (-23245.019) (-23289.407) (-23302.434) -- 2:28:51

Average standard deviation of split frequencies: 0.017741

750500 -- (-23269.910) (-23327.709) [-23256.967] (-23302.635) \* [-23235.970] (-23247.303) (-23279.092) (-23310.936) -- 2:28:32  
751000 -- (-23267.053) (-23308.699) [-23267.895] (-23299.768) \* [-23247.952] (-23241.371) (-23283.265) (-23319.465) -- 2:28:14  
751500 -- [-23253.626] (-23298.392) (-23271.197) (-23270.474) \* (-23270.855) (-23256.363) (-23290.094) (-23310.601) -- 2:27:56  
752000 -- (-23260.352) (-23298.691) (-23261.809) (-23274.599) \* (-23274.078) (-23252.931) (-23284.322) (-23320.801) -- 2:27:38  
752500 -- (-23273.882) (-23297.534) [-23259.166] (-23276.000) \* (-23270.150) (-23257.893) (-23290.847) (-23313.425) -- 2:27:20  
753000 -- (-23263.910) (-23284.181) [-23229.526] (-23263.074) \* (-23273.791) (-23265.541) (-23270.375) (-23312.638) -- 2:27:02  
753500 -- (-23257.104) (-23287.277) [-23225.515] (-23255.768) \* (-23272.891) (-23244.482) (-23270.535) (-23310.147) -- 2:26:44  
754000 -- (-23265.932) (-23290.780) [-23237.801] (-23256.928) \* [-23237.588] (-23276.291) (-23287.194) (-23315.360) -- 2:26:26  
754500 -- (-23275.300) (-23294.921) [-23237.798] (-23266.786) \* [-23229.051] (-23268.932) (-23281.136) (-23304.535) -- 2:26:08  
755000 -- (-23278.882) (-23292.169) [-23236.528] (-23287.439) \* [-23237.831] (-23264.860) (-23287.991) (-23315.200) -- 2:25:50

Average standard deviation of split frequencies: 0.017762

755500 -- (-23294.529) (-23292.940) [-23232.880] (-23271.184) \* [-23227.611] (-23257.555) (-23295.366) (-23325.560) -- 2:25:32  
756000 -- (-23279.428) (-23273.008) [-23237.243] (-23262.421) \* [-23227.269] (-23276.326) (-23318.524) (-23306.758) -- 2:25:14  
756500 -- (-23267.765) (-23271.614) [-23247.518] (-23275.109) \* [-23233.694] (-23285.068) (-23307.811) (-23303.635) -- 2:24:56  
757000 -- (-23288.157) (-23271.943) [-23250.785] (-23262.178) \* [-23223.324] (-23265.856) (-23315.734) (-23302.867) -- 2:24:38  
757500 -- (-23283.503) (-23249.500) [-23248.643] (-23276.381) \* [-23214.640] (-23276.413) (-23303.159) (-23301.628) -- 2:24:20  
758000 -- (-23291.609) (-23265.734) [-23242.814] (-23280.114) \* [-23211.789] (-23278.743) (-23294.092) (-23301.881) -- 2:24:02  
758500 -- (-23299.226) (-23269.591) [-23228.812] (-23273.242) \* [-23215.805] (-23283.752) (-23285.175) (-23293.973) -- 2:23:43  
759000 -- (-23306.685) (-23263.439) [-23220.959] (-23285.792) \* [-23211.988] (-23290.725) (-23257.236) (-23295.719) -- 2:23:25  
759500 -- (-23293.332) (-23278.740) [-23232.746] (-23272.163) \* [-23220.659] (-23283.979) (-23256.217) (-23290.463) -- 2:23:07  
760000 -- (-23280.951) (-23302.593) [-23231.262] (-23256.143) \* [-23220.691] (-23295.859) (-23238.407) (-23301.022) -- 2:22:49

Average standard deviation of split frequencies: 0.017443

760500 -- (-23286.505) (-23324.594) [-23213.708] (-23252.046) \* [-23221.484] (-23306.218) (-23234.011) (-23305.001) -- 2:22:31  
761000 -- (-23300.784) (-23333.586) [-23224.605] (-23233.133) \* [-23222.804] (-23290.613) (-23249.831) (-23307.046) -- 2:22:13  
761500 -- (-23282.203) (-23348.742) [-23213.643] (-23257.983) \* [-23225.361] (-23295.758) (-23255.320) (-23284.945) -- 2:21:55  
762000 -- (-23282.113) (-23333.659) [-23228.762] (-23259.809) \* [-23240.915] (-23319.952) (-23255.733) (-23275.739) -- 2:21:38  
762500 -- (-23276.593) (-23317.467) [-23219.366] (-23263.894) \* (-23246.159) (-23310.955) [-23240.294] (-23275.527) -- 2:21:20  
763000 -- (-23247.474) (-23300.152) [-23218.136] (-23293.981) \* (-23255.416) (-23297.598) [-23229.252] (-23276.315) -- 2:21:02  
763500 -- (-23262.326) (-23308.173) [-23229.057] (-23301.497) \* (-23245.834) (-23308.738) (-23238.091) (-23288.894) -- 2:20:44  
764000 -- (-23259.669) (-23306.747) [-23201.605] (-23330.602) \* [-23259.442] (-23298.217) (-23237.028) (-23277.288) -- 2:20:26  
764500 -- (-23272.107) (-23306.857) [-23208.257] (-23315.834) \* (-23254.677) (-23331.479) (-23239.858) (-23276.476) -- 2:20:08  
765000 -- (-23254.188) (-23317.316) [-23225.108] (-23315.541) \* (-23244.841) (-23317.869) [-23242.137] (-23294.510) -- 2:19:50

Average standard deviation of split frequencies: 0.017115

765500 -- (-23251.714) (-23304.868) [-23217.267] (-23337.907) \* [-23217.854] (-23315.450) (-23246.662) (-23298.051) -- 2:19:32  
766000 -- (-23266.267) (-23282.996) [-23216.822] (-23333.311) \* (-23234.556) (-23292.826) (-23248.585) (-23314.873) -- 2:19:14  
766500 -- (-23276.482) (-23276.357) [-23229.948] (-23336.174) \* (-23247.917) (-23291.808) [-23245.743] (-23324.514) -- 2:18:57  
767000 -- (-23270.649) (-23277.218) (-23259.557) (-23309.863) \* (-23254.945) (-23285.270) [-23232.361] (-23308.545) -- 2:18:39  
767500 -- [-23274.465] (-23293.390) (-23280.859) (-23317.222) \* (-23262.751) (-23281.591) (-23231.509) (-23298.658) -- 2:18:21  
768000 -- (-23286.113) (-23290.292) [-23269.878] (-23334.777) \* (-23241.420) (-23322.228) [-23239.250] (-23311.686) -- 2:18:03

768500 -- [-23279.589] (-23274.559) (-23271.341) (-23344.287) \* (-23245.272) (-23329.801) [-23234.676] (-23299.537) -- 2:17:45  
769000 -- [-23259.417] (-23268.493) (-23283.389) (-23351.863) \* (-23244.488) (-23336.210) [-23231.384] (-23291.276) -- 2:17:27  
769500 -- [-23276.765] (-23263.699) [-23251.232] (-23324.786) \* (-23246.732) (-23341.303) [-23236.158] (-23304.384) -- 2:17:09  
770000 -- (-23274.712) (-23264.398) [-23257.251] (-23321.144) \* (-23261.306) (-23317.805) [-23239.031] (-23296.910) -- 2:16:51

Average standard deviation of split frequencies: 0.017230

770500 -- [-23271.172] (-23267.341) (-23265.202) (-23329.208) \* (-23251.298) (-23319.388) [-23229.127] (-23307.341) -- 2:16:33  
771000 -- [-23264.542] (-23284.725) (-23252.461) (-23322.314) \* (-23251.362) (-23317.843) [-23231.378] (-23328.277) -- 2:16:15  
771500 -- [-23254.293] (-23285.504) (-23270.687) (-23320.565) \* (-23267.465) (-23320.294) [-23227.228] (-23354.439) -- 2:15:57  
772000 -- [-23252.627] (-23284.356) (-23294.911) (-23342.053) \* (-23268.624) (-23289.074) [-23238.513] (-23332.775) -- 2:15:39  
772500 -- [-23245.944] (-23290.755) (-23285.926) (-23338.849) \* (-23263.676) (-23282.745) [-23244.781] (-23341.531) -- 2:15:21  
773000 -- [-23251.254] (-23280.016) (-23282.326) (-23333.181) \* (-23250.635) (-23284.111) [-23243.629] (-23331.534) -- 2:15:03  
773500 -- [-23230.836] (-23280.654) (-23273.149) (-23331.225) \* (-23247.635) (-23290.175) [-23242.136] (-23313.257) -- 2:14:45  
774000 -- [-23222.416] (-23271.643) (-23263.302) (-23336.538) \* (-23248.736) (-23281.198) [-23239.720] (-23303.850) -- 2:14:27  
774500 -- [-23215.805] (-23264.512) (-23265.039) (-23320.594) \* (-23273.392) (-23280.261) [-23221.852] (-23307.274) -- 2:14:09  
775000 -- [-23213.045] (-23268.307) (-23270.568) (-23299.434) \* (-23289.066) (-23288.126) [-23249.092] (-23312.936) -- 2:13:51

Average standard deviation of split frequencies: 0.017304

775500 -- [-23218.952] (-23277.323) (-23266.180) (-23321.599) \* (-23288.947) (-23274.742) [-23244.985] (-23317.174) -- 2:13:33  
776000 -- [-23219.837] (-23265.399) (-23284.382) (-23309.553) \* (-23280.414) (-23264.026) [-23242.910] (-23314.370) -- 2:13:15  
776500 -- [-23218.930] (-23246.414) (-23274.199) (-23320.832) \* (-23278.031) (-23254.365) [-23241.415] (-23314.302) -- 2:12:58  
777000 -- (-23224.480) (-23245.809) (-23274.137) (-23312.973) \* (-23295.914) (-23238.708) [-23242.290] (-23312.207) -- 2:12:40  
777500 -- (-23234.349) [-23238.936] (-23284.857) (-23301.253) \* (-23281.962) [-23238.646] (-23253.442) (-23330.534) -- 2:12:22  
778000 -- (-23248.348) [-23242.042] (-23256.735) (-23322.558) \* (-23279.723) (-23260.282) [-23247.974] (-23333.074) -- 2:12:04  
778500 -- (-23262.603) (-23234.506) [-23232.223] (-23336.906) \* (-23277.598) (-23260.793) [-23242.460] (-23330.168) -- 2:11:47  
779000 -- (-23253.896) (-23250.120) [-23240.013] (-23305.868) \* (-23300.978) (-23263.666) [-23243.854] (-23335.057) -- 2:11:29  
779500 -- (-23275.538) [-23249.398] (-23240.606) (-23307.476) \* (-23305.440) (-23255.930) [-23238.523] (-23332.807) -- 2:11:11  
780000 -- (-23277.320) [-23244.387] (-23260.288) (-23335.904) \* (-23312.032) (-23263.476) [-23238.336] (-23348.694) -- 2:10:53

Average standard deviation of split frequencies: 0.017214

780500 -- [-23274.896] (-23250.606) (-23274.265) (-23328.872) \* (-23302.058) (-23283.445) [-23234.817] (-23333.062) -- 2:10:35  
781000 -- (-23261.059) [-23227.154] (-23280.078) (-23343.853) \* (-23291.832) (-23279.948) [-23237.127] (-23349.416) -- 2:10:17  
781500 -- (-23277.835) [-23241.503] (-23291.052) (-23348.538) \* (-23276.059) (-23292.562) [-23243.094] (-23337.393) -- 2:09:59  
782000 -- (-23280.032) [-23226.173] (-23282.159) (-23361.702) \* (-23274.718) (-23281.754) [-23257.582] (-23333.975) -- 2:09:41  
782500 -- (-23268.484) [-23232.385] (-23302.214) (-23349.452) \* (-23266.545) (-23274.538) [-23245.445] (-23331.113) -- 2:09:23  
783000 -- (-23254.747) [-23227.459] (-23302.932) (-23340.726) \* (-23252.131) (-23273.631) (-23244.298) (-23318.583) -- 2:09:05  
783500 -- (-23253.861) [-23219.609] (-23301.659) (-23319.134) \* (-23249.663) (-23276.185) (-23244.405) (-23304.527) -- 2:08:47  
784000 -- (-23252.370) [-23214.688] (-23316.277) (-23335.415) \* (-23262.698) (-23268.764) [-23232.230] (-23293.417) -- 2:08:29  
784500 -- (-23254.012) [-23226.203] (-23321.172) (-23343.784) \* (-23279.010) (-23276.255) [-23232.277] (-23298.427) -- 2:08:12  
785000 -- (-23254.230) [-23228.055] (-23318.507) (-23316.859) \* (-23287.143) (-23282.245) [-23238.963] (-23326.586) -- 2:07:54

Average standard deviation of split frequencies: 0.016918

785500 -- (-23248.152) [-23224.806] (-23320.636) (-23283.821) \* (-23322.123) (-23256.964) [-23240.868] (-23336.488) -- 2:07:36  
786000 -- (-23239.103) [-23236.644] (-23307.771) (-23306.384) \* (-23332.632) [-23249.388] (-23242.879) (-23338.256) -- 2:07:18  
786500 -- (-23246.966) [-23240.089] (-23290.937) (-23329.050) \* (-23318.196) (-23262.415) [-23248.080] (-23348.744) -- 2:07:00  
787000 -- (-23251.193) [-23245.982] (-23288.316) (-23320.642) \* (-23305.132) (-23265.241) [-23251.569] (-23335.915) -- 2:06:42  
787500 -- (-23258.897) [-23240.569] (-23294.615) (-23321.760) \* (-23234.355) (-23262.494) [-23243.925] (-23327.147) -- 2:06:25  
788000 -- (-23247.809) [-23223.329] (-23317.911) (-23309.405) \* (-23313.965) [-23258.440] (-23235.997) (-23325.910) -- 2:06:07  
788500 -- (-23250.739) [-23230.570] (-23288.636) (-23305.514) \* (-23297.322) (-23256.814) [-23244.625] (-23335.554) -- 2:05:49  
789000 -- (-23267.616) [-23223.329] (-23272.377) (-23301.731) \* (-23283.791) (-23252.202) [-23227.474] (-23334.090) -- 2:05:31  
789500 -- (-23270.405) [-23218.328] (-23276.559) (-23304.586) \* (-23277.269) [-23242.883] (-23252.493) (-23306.213) -- 2:05:14  
790000 -- (-23267.399) [-23235.323] (-23283.524) (-23322.329) \* (-23265.198) (-23243.668) [-23239.824] (-23309.609) -- 2:04:56

Average standard deviation of split frequencies: 0.016592

790500 -- (-23261.275) [-23224.833] (-23293.670) (-23335.912) \* (-23263.069) [-23250.613] (-23231.420) (-23304.885) -- 2:04:38  
791000 -- (-23248.752) [-23222.691] (-23291.032) (-23321.491) \* (-23262.245) (-23259.637) [-23225.447] (-23293.938) -- 2:04:20  
791500 -- (-23250.344) [-23233.708] (-23285.278) (-23325.744) \* (-23278.612) (-23257.603) [-23225.582] (-23299.094) -- 2:04:02  
792000 -- [-23242.203] (-23246.564) (-23289.531) (-23331.528) \* (-23259.230) (-23280.643) [-23223.526] (-23308.438) -- 2:03:44  
792500 -- (-23250.451) [-23242.552] (-23272.466) (-23318.065) \* (-23265.852) (-23281.079) [-23229.152] (-23327.920) -- 2:03:27  
793000 -- (-23246.151) [-23246.946] (-23263.020) (-23336.315) \* (-23264.862) (-23285.394) [-23240.138] (-23321.409) -- 2:03:09  
793500 -- (-23248.982) (-23263.898) (-23270.916) (-23330.801) \* (-23251.688) (-23278.314) (-23241.846) (-23326.501) -- 2:02:51  
794000 -- (-23273.226) (-23263.348) (-23289.246) (-23343.823) \* (-23238.957) (-23271.898) (-23264.556) (-23321.920) -- 2:02:33  
794500 -- (-23282.203) (-23247.786) (-23301.718) (-23331.313) \* (-23232.590) (-23266.287) (-23271.593) (-23302.391) -- 2:02:16  
795000 -- (-23293.950) [-23225.964] (-23308.025) (-23318.196) \* (-23228.190) (-23259.567) (-23255.794) (-23296.178) -- 2:01:58

Average standard deviation of split frequencies: 0.016351

795500 -- [-23296.453] (-23244.430) (-23324.665) (-23301.373) \* [-23231.327] (-23270.235) (-23261.332) (-23287.133) -- 2:01:40  
796000 -- [-23265.865] (-23237.231) (-23309.300) (-23304.586) \* [-23238.870] (-23269.941) (-23260.154) (-23279.528) -- 2:01:22  
796500 -- (-23264.654) [-23253.999] (-23318.464) (-23293.105) \* [-23230.795] (-23274.532) (-23262.318) (-23288.980) -- 2:01:04  
797000 -- [-23258.022] (-23258.197) (-23340.814) (-23292.884) \* [-23250.075] (-23297.004) (-23274.855) (-23279.876) -- 2:00:47  
797500 -- [-23264.614] (-23247.841) (-23347.907) (-23302.225) \* [-23237.200] (-23282.694) (-23278.730) (-23285.950) -- 2:00:29  
798000 -- [-23254.522] (-23258.967) (-23345.488) (-23289.550) \* [-23247.753] (-23277.522) (-23267.743) (-23315.031) -- 2:00:11  
798500 -- (-23230.601) (-23259.768) (-23375.857) (-23284.854) \* (-23253.089) (-23290.371) (-23256.819) (-23290.918) -- 1:59:53  
799000 -- (-23236.278) (-23269.401) (-23381.480) (-23268.059) \* (-23254.080) (-23284.760) (-23254.166) (-23290.480) -- 1:59:35  
799500 -- (-23240.236) (-23259.396) (-23357.740) (-23288.014) \* (-23249.365) (-23278.253) (-23265.930) (-23263.166) -- 1:59:18  
800000 -- [-23246.744] (-23261.564) (-23365.147) (-23288.189) \* (-23264.075) (-23283.246) [-23254.772] (-23281.947) -- 1:59:00

Average standard deviation of split frequencies: 0.016360

800500 -- (-23244.416) [-23250.265] (-23345.678) (-23291.586) \* [-23269.461] (-23284.665) (-23263.205) (-23282.860) -- 1:58:42  
801000 -- (-23234.727) [-23243.226] (-23361.468) (-23282.368) \* [-23262.024] (-23264.602) (-23260.472) (-23269.513) -- 1:58:24  
801500 -- (-23248.131) [-23274.043] (-23369.729) (-23284.807) \* (-23270.808) (-23263.123) (-23259.286) (-23264.936) -- 1:58:06  
802000 -- [-23221.316] (-23265.787) (-23347.445) (-23282.691) \* (-23286.665) (-23260.019) [-23243.995] (-23255.810) -- 1:57:49  
802500 -- (-23219.675) (-23266.656) (-23327.824) (-23275.921) \* (-23307.438) (-23268.524) (-23247.316) (-23251.447) -- 1:57:31  
803000 -- [-23225.092] (-23260.243) (-23304.227) (-23252.413) \* (-23325.459) (-23272.252) (-23260.107) (-23237.877) -- 1:57:13  
803500 -- [-23219.639] (-23275.902) (-23333.086) (-23251.538) \* (-23312.731) (-23264.204) (-23276.655) [-23230.902] -- 1:56:55  
804000 -- [-23206.667] (-23286.037) (-23333.197) (-23250.114) \* (-23291.008) (-23281.358) (-23254.208) [-23229.825] -- 1:56:37  
804500 -- [-23201.002] (-23277.035) (-23339.139) (-23253.111) \* (-23276.355) (-23265.437) [-23240.522] (-23257.984) -- 1:56:20  
805000 -- (-23209.463) (-23290.239) (-23333.151) (-23267.465) \* (-23290.060) (-23258.339) (-23268.579) (-23268.730) -- 1:56:02

Average standard deviation of split frequencies: 0.016351

805500 -- [-23215.024] (-23279.787) (-23317.735) (-23263.884) \* (-23302.077) [-23253.973] (-23256.560) (-23271.481) -- 1:55:44  
806000 -- [-23221.581] (-23289.045) (-23341.706) (-23286.374) \* (-23298.516) (-23259.056) (-23256.469) (-23288.100) -- 1:55:26  
806500 -- [-23212.071] (-23304.140) (-23331.267) (-23275.187) \* (-23288.485) (-23259.040) (-23265.573) (-23311.160) -- 1:55:09  
807000 -- [-23221.180] (-23295.386) (-23325.381) (-23272.163) \* (-23280.195) (-23262.231) (-23251.322) (-23308.023) -- 1:54:51  
807500 -- [-23224.809] (-23288.452) (-23321.171) (-23245.875) \* (-23285.498) (-23240.757) (-23246.795) (-23298.497) -- 1:54:33  
808000 -- [-23210.474] (-23282.876) (-23304.727) (-23243.372) \* (-23298.320) (-23262.153) (-23264.602) (-23291.779) -- 1:54:15  
808500 -- (-23224.574) (-23291.908) (-23287.170) [-23227.354] \* (-23274.363) (-23259.643) (-23244.083) (-23272.052) -- 1:53:57  
809000 -- [-23225.747] (-23314.907) (-23289.652) (-23228.434) \* (-23263.254) (-23269.150) (-23247.251) (-23280.992) -- 1:53:40  
809500 -- [-23237.742] (-23311.526) (-23286.195) (-23231.690) \* (-23250.772) (-23253.204) (-23259.676) (-23298.011) -- 1:53:21  
810000 -- [-23232.958] (-23318.524) (-23283.713) (-23250.922) \* (-23252.567) (-23271.053) [-23250.732] (-23287.922) -- 1:53:04



Average standard deviation of split frequencies: 0.016771

|        |    |              |              |              |              |   |              |              |              |              |    |         |
|--------|----|--------------|--------------|--------------|--------------|---|--------------|--------------|--------------|--------------|----|---------|
| 810500 | -- | [-23222.101] | (-23303.310) | (-23259.224) | (-23257.801) | * | (-23260.745) | (-23287.930) | [-23248.987] | (-23275.622) | -- | 1:52:46 |
| 811000 | -- | [-23235.635] | (-23318.354) | (-23262.815) | (-23248.997) | * | (-23275.445) | (-23279.334) | [-23244.592] | (-23286.606) | -- | 1:52:29 |
| 811500 | -- | [-23249.091] | (-23282.118) | (-23267.417) | (-23238.484) | * | [-23262.456] | (-23285.666) | (-23232.350) | (-23283.793) | -- | 1:52:11 |
| 812000 | -- | [-23239.600] | (-23263.453) | (-23299.847) | (-23239.742) | * | (-23276.429) | (-23298.210) | [-23222.983] | (-23272.597) | -- | 1:51:53 |
| 812500 | -- | [-23261.482] | (-23277.077) | (-23293.546) | [-23229.210] | * | (-23260.981) | (-23302.587) | (-23235.981) | [-23270.645] | -- | 1:51:35 |
| 813000 | -- | (-23268.473) | (-23295.274) | (-23281.934) | [-23248.838] | * | (-23258.344) | (-23277.561) | [-23231.809] | (-23296.417) | -- | 1:51:17 |
| 813500 | -- | (-23255.573) | (-23284.265) | (-23299.721) | (-23254.800) | * | (-23254.542) | (-23277.502) | [-23248.897] | (-23273.247) | -- | 1:51:00 |
| 814000 | -- | (-23256.198) | (-23272.607) | (-23303.266) | (-23264.773) | * | (-23261.535) | (-23298.917) | [-23233.898] | (-23269.716) | -- | 1:50:42 |
| 814500 | -- | [-23242.113] | (-23271.363) | (-23310.803) | (-23268.810) | * | (-23249.274) | (-23301.937) | [-23246.703] | (-23267.916) | -- | 1:50:24 |
| 815000 | -- | (-23235.869) | (-23280.191) | (-23322.403) | [-23267.898] | * | [-23247.569] | (-23314.689) | (-23257.913) | (-23259.009) | -- | 1:50:06 |

Average standard deviation of split frequencies: 0.016893

|        |    |              |              |              |              |   |              |              |              |              |    |         |
|--------|----|--------------|--------------|--------------|--------------|---|--------------|--------------|--------------|--------------|----|---------|
| 815500 | -- | (-23256.031) | (-23281.827) | (-23318.974) | [-23267.712] | * | [-23242.049] | (-23299.178) | (-23242.284) | (-23274.327) | -- | 1:49:48 |
| 816000 | -- | (-23273.395) | (-23289.440) | (-23308.398) | [-23284.458] | * | (-23251.801) | (-23285.305) | [-23250.098] | (-23279.392) | -- | 1:49:30 |
| 816500 | -- | (-23271.704) | (-23295.651) | (-23314.801) | [-23261.228] | * | (-23243.087) | (-23280.275) | [-23235.917] | (-23292.087) | -- | 1:49:12 |
| 817000 | -- | [-23257.640] | (-23292.485) | (-23323.017) | (-23285.410) | * | [-23235.603] | (-23287.440) | (-23257.087) | (-23308.903) | -- | 1:48:54 |
| 817500 | -- | (-23257.611) | (-23302.047) | (-23326.761) | [-23266.561] | * | [-23244.289] | (-23278.403) | (-23278.458) | (-23297.925) | -- | 1:48:36 |
| 818000 | -- | (-23266.635) | (-23284.944) | (-23314.004) | [-23267.030] | * | [-23241.228] | (-23267.123) | (-23277.567) | (-23306.756) | -- | 1:48:18 |
| 818500 | -- | (-23271.660) | (-23296.269) | (-23307.879) | [-23262.214] | * | [-23228.907] | (-23272.001) | (-23271.173) | (-23342.941) | -- | 1:48:00 |
| 819000 | -- | (-23259.114) | (-23300.749) | (-23302.666) | [-23264.496] | * | [-23229.801] | (-23260.154) | (-23270.849) | (-23322.536) | -- | 1:47:42 |
| 819500 | -- | [-23272.371] | (-23290.129) | (-23331.587) | (-23275.740) | * | [-23231.163] | (-23263.237) | (-23277.245) | (-23321.300) | -- | 1:47:24 |
| 820000 | -- | (-23255.230) | (-23273.900) | (-23307.570) | [-23277.266] | * | [-23232.267] | (-23265.965) | (-23264.301) | (-23325.905) | -- | 1:47:06 |

Average standard deviation of split frequencies: 0.017059

|        |    |              |              |              |              |   |              |              |              |              |    |         |
|--------|----|--------------|--------------|--------------|--------------|---|--------------|--------------|--------------|--------------|----|---------|
| 820500 | -- | [-23247.104] | (-23276.471) | (-23318.817) | (-23277.582) | * | [-23229.346] | (-23289.618) | (-23254.158) | (-23326.802) | -- | 1:46:48 |
| 821000 | -- | (-23240.196) | (-23270.329) | (-23280.075) | (-23287.589) | * | [-23232.736] | (-23315.587) | (-23262.666) | (-23306.318) | -- | 1:46:30 |
| 821500 | -- | (-23251.854) | (-23278.578) | (-23275.272) | (-23282.638) | * | [-23245.628] | (-23305.075) | (-23261.424) | (-23285.763) | -- | 1:46:12 |
| 822000 | -- | (-23243.007) | (-23271.138) | (-23279.291) | (-23278.139) | * | [-23235.083] | (-23320.976) | (-23287.282) | (-23307.901) | -- | 1:45:54 |
| 822500 | -- | (-23245.120) | (-23297.148) | (-23276.241) | (-23286.264) | * | [-23239.892] | (-23325.872) | (-23266.527) | (-23291.920) | -- | 1:45:36 |
| 823000 | -- | [-23241.752] | (-23318.939) | (-23264.319) | (-23296.429) | * | [-23228.006] | (-23331.541) | (-23268.709) | (-23263.908) | -- | 1:45:18 |
| 823500 | -- | (-23251.674) | (-23299.651) | (-23263.453) | (-23317.350) | * | [-23223.936] | (-23300.681) | (-23247.305) | (-23263.022) | -- | 1:45:01 |
| 824000 | -- | (-23258.894) | (-23302.886) | (-23306.663) | (-23296.463) | * | [-23222.047] | (-23309.589) | (-23249.522) | (-23269.546) | -- | 1:44:43 |
| 824500 | -- | (-23259.816) | (-23308.501) | (-23282.600) | (-23305.863) | * | [-23217.742] | (-23314.835) | (-23256.164) | (-23272.214) | -- | 1:44:25 |
| 825000 | -- | (-23271.930) | (-23320.006) | (-23309.650) | (-23318.086) | * | [-23229.205] | (-23308.252) | (-23266.037) | (-23257.026) | -- | 1:44:07 |

Average standard deviation of split frequencies: 0.016944

|        |    |              |              |              |              |   |              |              |              |              |    |         |
|--------|----|--------------|--------------|--------------|--------------|---|--------------|--------------|--------------|--------------|----|---------|
| 825500 | -- | (-23287.035) | (-23293.761) | (-23310.694) | (-23314.216) | * | [-23249.529] | (-23307.912) | (-23268.478) | (-23254.089) | -- | 1:43:49 |
| 826000 | -- | (-23289.384) | (-23282.721) | (-23281.750) | (-23305.725) | * | (-23263.156) | (-23307.720) | (-23284.199) | [-23270.765] | -- | 1:43:31 |
| 826500 | -- | [-23278.151] | (-23292.794) | (-23270.179) | (-23311.269) | * | (-23257.070) | (-23312.859) | (-23277.592) | [-23250.947] | -- | 1:43:14 |
| 827000 | -- | (-23288.887) | (-23282.941) | (-23266.039) | (-23328.173) | * | (-23279.372) | (-23310.974) | (-23280.436) | [-23246.527] | -- | 1:42:56 |
| 827500 | -- | (-23283.365) | (-23275.903) | (-23264.783) | (-23338.809) | * | (-23264.991) | (-23329.708) | (-23286.770) | [-23240.924] | -- | 1:42:38 |
| 828000 | -- | (-23281.428) | (-23274.240) | (-23249.213) | (-23349.342) | * | (-23250.163) | (-23331.458) | (-23306.688) | [-23236.926] | -- | 1:42:20 |
| 828500 | -- | (-23275.644) | (-23257.151) | (-23249.427) | (-23330.602) | * | [-23261.232] | (-23325.858) | (-23301.758) | (-23271.254) | -- | 1:42:03 |
| 829000 | -- | (-23288.502) | (-23253.259) | (-23249.858) | (-23329.108) | * | [-23260.860] | (-23326.685) | (-23302.930) | (-23262.426) | -- | 1:41:45 |
| 829500 | -- | (-23299.700) | (-23237.430) | (-23245.571) | (-23321.883) | * | [-23278.222] | (-23321.792) | (-23299.295) | (-23258.406) | -- | 1:41:27 |
| 830000 | -- | (-23293.425) | (-23242.330) | (-23254.277) | (-23293.023) | * | (-23279.998) | (-23304.308) | (-23309.185) | [-23253.673] | -- | 1:41:09 |

Average standard deviation of split frequencies: 0.016877

|        |    |              |              |              |              |   |              |              |              |              |    |         |
|--------|----|--------------|--------------|--------------|--------------|---|--------------|--------------|--------------|--------------|----|---------|
| 830500 | -- | (-23288.010) | [-23242.712] | (-23247.592) | (-23318.804) | * | [-23272.345] | (-23301.824) | (-23307.005) | (-23257.701) | -- | 1:40:51 |
| 831000 | -- | (-23285.239) | (-23249.754) | (-23247.061) | (-23323.622) | * | [-23254.375] | (-23309.474) | (-23302.377) | (-23291.045) | -- | 1:40:33 |
| 831500 | -- | (-23283.061) | (-23251.226) | (-23232.105) | (-23320.011) | * | [-23245.473] | (-23302.486) | (-23303.341) | (-23281.141) | -- | 1:40:15 |
| 832000 | -- | (-23293.050) | (-23248.658) | (-23237.846) | (-23318.557) | * | [-23253.967] | (-23317.295) | (-23300.408) | (-23266.563) | -- | 1:39:57 |
| 832500 | -- | (-23288.853) | (-23250.358) | (-23231.491) | (-23311.941) | * | [-23252.679] | (-23324.262) | (-23311.456) | (-23260.679) | -- | 1:39:40 |
| 833000 | -- | (-23267.907) | (-23262.483) | (-23237.131) | (-23288.766) | * | [-23266.724] | (-23314.523) | (-23285.756) | (-23253.811) | -- | 1:39:21 |
| 833500 | -- | (-23298.138) | (-23270.143) | (-23232.317) | (-23312.129) | * | (-23272.783) | (-23309.988) | (-23273.440) | [-23249.127] | -- | 1:39:03 |
| 834000 | -- | (-23294.820) | (-23265.031) | (-23231.256) | (-23328.537) | * | (-23270.215) | (-23313.089) | (-23265.607) | [-23252.279] | -- | 1:38:46 |
| 834500 | -- | (-23295.190) | (-23263.630) | (-23249.949) | (-23314.166) | * | (-23258.181) | (-23321.956) | [-23260.922] | (-23247.721) | -- | 1:38:28 |
| 835000 | -- | (-23295.435) | (-23233.930) | (-23240.562) | (-23315.687) | * | (-23259.144) | (-23298.705) | (-23270.201) | [-23257.093] | -- | 1:38:10 |

Average standard deviation of split frequencies: 0.016843

|        |    |              |              |              |              |   |              |              |              |              |    |         |
|--------|----|--------------|--------------|--------------|--------------|---|--------------|--------------|--------------|--------------|----|---------|
| 835500 | -- | (-23304.468) | [-23246.194] | (-23238.352) | (-23318.486) | * | (-23252.633) | (-23287.088) | (-23245.535) | (-23275.909) | -- | 1:37:52 |
| 836000 | -- | (-23322.690) | (-23249.025) | (-23235.935) | (-23310.695) | * | [-23248.578] | (-23307.192) | (-23267.689) | (-23284.075) | -- | 1:37:34 |
| 836500 | -- | (-23311.516) | (-23247.639) | (-23248.216) | (-23295.675) | * | [-23243.621] | (-23311.257) | (-23251.063) | (-23287.177) | -- | 1:37:16 |
| 837000 | -- | (-23322.823) | (-23245.344) | (-23246.689) | (-23326.657) | * | [-23248.993] | (-23310.500) | (-23257.236) | (-23286.770) | -- | 1:36:58 |
| 837500 | -- | (-23326.749) | (-23273.784) | (-23248.652) | (-23318.757) | * | [-23246.093] | (-23319.957) | (-23260.513) | (-23297.786) | -- | 1:36:40 |
| 838000 | -- | (-23337.207) | (-23262.595) | (-23258.412) | (-23309.561) | * | [-23253.375] | (-23297.780) | (-23246.140) | (-23314.819) | -- | 1:36:22 |
| 838500 | -- | (-23324.086) | (-23256.051) | (-23267.013) | (-23324.692) | * | (-23259.822) | (-23297.964) | (-23230.363) | (-23312.475) | -- | 1:36:04 |
| 839000 | -- | (-23312.612) | (-23242.467) | (-23242.957) | (-23315.152) | * | (-23264.900) | (-23305.974) | (-23245.481) | (-23313.549) | -- | 1:35:47 |
| 839500 | -- | (-23287.382) | (-23259.349) | (-23246.705) | (-23328.612) | * | (-23262.486) | (-23317.777) | (-23242.664) | (-23312.561) | -- | 1:35:29 |
| 840000 | -- | (-23282.019) | (-23265.043) | (-23253.843) | (-23331.018) | * | (-23283.180) | (-23334.684) | (-23227.599) | (-23305.707) | -- | 1:35:11 |

Average standard deviation of split frequencies: 0.016619

|        |    |              |              |              |              |   |              |              |              |              |    |         |
|--------|----|--------------|--------------|--------------|--------------|---|--------------|--------------|--------------|--------------|----|---------|
| 840500 | -- | (-23267.900) | (-23258.097) | (-23238.051) | (-23325.477) | * | (-23259.483) | (-23339.183) | (-23228.495) | (-23298.828) | -- | 1:34:53 |
| 841000 | -- | (-23274.456) | (-23253.942) | (-23233.118) | (-23319.030) | * | (-23275.043) | (-23330.751) | (-23229.264) | (-23285.322) | -- | 1:34:35 |
| 841500 | -- | (-23270.342) | (-23263.555) | (-23222.096) | (-23325.948) | * | (-23254.223) | (-23312.969) | (-23242.417) | (-23269.006) | -- | 1:34:18 |
| 842000 | -- | (-23292.119) | (-23252.287) | (-23227.650) | (-23324.411) | * | [-23251.498] | (-23296.736) | (-23247.917) | (-23263.133) | -- | 1:34:00 |
| 842500 | -- | (-23319.100) | (-23243.996) | (-23235.086) | (-23325.685) | * | [-23242.230] | (-23273.327) | (-23242.311) | (-23270.796) | -- | 1:33:42 |
| 843000 | -- | (-23287.439) | (-23238.895) | (-23236.205) | (-23324.610) | * | [-23252.048] | (-23277.510) | (-23263.574) | (-23264.335) | -- | 1:33:24 |
| 843500 | -- | (-23278.755) | (-23251.234) | (-23241.018) | (-23317.117) | * | (-23260.997) | (-23259.717) | (-23282.961) | (-23256.076) | -- | 1:33:07 |
| 844000 | -- | (-23262.048) | (-23251.769) | (-23241.666) | (-23296.411) | * | [-23253.389] | (-23261.740) | (-23281.161) | (-23274.026) | -- | 1:32:49 |
| 844500 | -- | (-23267.937) | (-23252.708) | (-23241.280) | (-23314.921) | * | [-23243.628] | (-23256.350) | (-23276.659) | (-23267.527) | -- | 1:32:31 |
| 845000 | -- | (-23277.009) | (-23247.228) | (-23245.093) | (-23323.574) | * | [-23238.459] | (-23262.743) | (-23250.353) | (-23273.626) | -- | 1:32:13 |

Average standard deviation of split frequencies: 0.016527

|        |    |              |              |              |              |   |              |              |              |              |    |         |
|--------|----|--------------|--------------|--------------|--------------|---|--------------|--------------|--------------|--------------|----|---------|
| 845500 | -- | (-23275.139) | [-23238.210] | (-23252.801) | (-23316.459) | * | (-23250.912) | (-23256.785) | [-23267.470] | (-23298.911) | -- | 1:31:56 |
| 846000 | -- | (-23295.092) | (-23251.795) | (-23258.304) | (-23340.108) | * | [-23244.524] | (-23258.748) | (-23273.644) | (-23309.846) | -- | 1:31:38 |
| 846500 | -- | (-23290.403) | (-23236.425) | (-23253.957) | (-23322.563) | * | [-23239.350] | (-23262.911) | (-23273.881) | (-23314.185) | -- | 1:31:20 |
| 84     |    |              |              |              |              |   |              |              |              |              |    |         |

851000 -- (-23314.537) [-23243.817] (-23261.293) (-23275.117) \* [-23258.222] (-23271.387) (-23285.809) (-23315.995) -- 1:28:40  
851500 -- (-23343.414) [-23243.910] (-23262.644) (-23277.050) \* [-23254.260] (-23269.669) (-23269.065) (-23306.776) -- 1:28:22  
852000 -- (-23311.793) [-23221.682] (-23266.418) (-23259.528) \* [-23244.425] (-23272.004) (-23265.220) (-23310.332) -- 1:28:04  
852500 -- (-23307.282) [-23206.707] (-23256.300) (-23262.411) \* [-23244.190] (-23262.789) (-23271.175) (-23315.221) -- 1:27:46  
853000 -- (-23298.760) [-23216.099] (-23265.015) (-23275.618) \* [-23261.690] (-23270.754) (-23289.958) (-23320.365) -- 1:27:28  
853500 -- (-23306.713) [-23222.723] (-23264.223) (-23287.376) \* [-23266.392] (-23251.692) (-23298.749) (-23296.387) -- 1:27:10  
854000 -- (-23302.387) [-23217.739] (-23265.879) (-23282.685) \* [-23259.517] (-23242.743) (-23301.965) (-23292.394) -- 1:26:52  
854500 -- (-23320.712) [-23214.215] (-23273.142) (-23301.011) \* [-23256.625] (-23240.319) (-23298.769) (-23298.132) -- 1:26:35  
855000 -- (-23347.391) [-23216.593] (-23259.550) (-23300.279) \* (-23247.990) [-23220.391] (-23324.653) (-23291.386) -- 1:26:17

Average standard deviation of split frequencies: 0.016249

855500 -- (-23322.273) [-23221.148] (-23248.625) (-23285.980) \* (-23242.378) [-23224.121] (-23331.489) (-23292.971) -- 1:25:59  
856000 -- (-23314.110) [-23224.996] (-23266.319) (-23295.769) \* (-23241.187) [-23238.026] (-23354.349) (-23297.701) -- 1:25:41  
856500 -- (-23311.239) [-23222.701] (-23288.255) (-23294.178) \* [-23238.296] (-23226.692) (-23325.392) (-23283.399) -- 1:25:23  
857000 -- (-23325.522) [-23226.369] (-23288.086) (-23267.842) \* [-23243.105] (-23233.683) (-23335.602) (-23273.883) -- 1:25:05  
857500 -- (-23302.407) [-23235.832] (-23268.709) [-23247.665] \* [-23249.794] (-23255.572) (-23335.720) (-23276.117) -- 1:24:47  
858000 -- (-23325.034) [-23233.624] (-23266.071) (-23252.398) \* [-23255.188] (-23261.340) (-23329.448) (-23303.719) -- 1:24:29  
858500 -- (-23324.028) (-23256.855) (-23274.165) [-23229.911] \* (-23283.184) [-23242.899] (-23302.077) (-23315.206) -- 1:24:12  
859000 -- (-23307.247) [-23237.459] (-23298.430) (-23232.185) \* (-23273.121) [-23232.101] (-23303.939) (-23315.022) -- 1:23:54  
859500 -- (-23302.916) (-23225.132) (-23286.729) [-23207.975] \* (-23270.172) [-23250.370] (-23278.852) (-23313.424) -- 1:23:36  
860000 -- (-23305.323) (-23237.938) (-23268.459) [-23214.761] \* [-23244.178] (-23268.733) (-23253.378) (-23340.535) -- 1:23:18

Average standard deviation of split frequencies: 0.016020

860500 -- (-23311.132) (-23245.712) (-23286.275) [-23226.657] \* (-23257.461) (-23261.787) [-23239.420] (-23321.747) -- 1:23:00  
861000 -- (-23305.042) (-23248.946) (-23305.143) [-23225.489] \* (-23271.399) [-23236.343] (-23260.968) (-23348.065) -- 1:22:43  
861500 -- (-23299.502) [-23237.788] (-23299.865) (-23243.387) \* [-23255.786] (-23234.313) (-23274.670) (-23349.020) -- 1:22:25  
862000 -- (-23284.288) [-23240.000] (-23313.042) (-23262.513) \* [-23251.490] (-23232.089) [-23242.636] (-23344.560) -- 1:22:08  
862500 -- (-23281.466) [-23240.786] (-23301.486) (-23287.387) \* (-23251.371) [-23231.608] (-23250.163) (-23323.145) -- 1:21:50  
863000 -- (-23269.543) [-23245.880] (-23295.501) (-23285.793) \* (-23261.475) [-23245.182] (-23262.895) (-23313.923) -- 1:21:32  
863500 -- (-23261.737) [-23255.166] (-23294.173) (-23297.688) \* (-23262.852) (-23258.030) (-23264.762) (-23307.978) -- 1:21:15  
864000 -- (-23252.174) [-23271.784] (-23285.137) (-23279.775) \* (-23257.121) [-23251.872] (-23272.082) (-23297.843) -- 1:20:57  
864500 -- (-23252.117) (-23278.136) (-23275.055) (-23271.142) \* [-23242.168] (-23250.607) (-23278.607) (-23318.141) -- 1:20:39  
865000 -- (-23243.515) (-23256.988) (-23288.190) (-23269.979) \* (-23228.734) (-23238.690) (-23284.324) (-23318.660) -- 1:20:22

Average standard deviation of split frequencies: 0.015835

865500 -- (-23228.589) (-23268.234) (-23311.332) (-23272.734) \* [-23235.871] (-23245.789) (-23288.408) (-23311.354) -- 1:20:04  
866000 -- (-23226.817) (-23268.669) (-23300.067) (-23268.018) \* [-23238.355] (-23258.372) (-23287.048) (-23293.063) -- 1:19:46  
866500 -- (-23228.922) (-23258.894) (-23288.726) (-23271.477) \* [-23226.615] (-23268.671) (-23296.986) (-23275.984) -- 1:19:28  
867000 -- (-23220.953) (-23263.522) (-23275.487) (-23249.202) \* [-23218.172] (-23262.048) (-23285.611) (-23263.444) -- 1:19:10  
867500 -- (-23213.400) (-23281.715) (-23249.024) (-23248.694) \* [-23228.086] (-23276.169) (-23291.212) (-23270.459) -- 1:18:53  
868000 -- (-23224.164) [-23291.124] (-23254.597) (-23264.911) \* [-23237.478] (-23274.510) (-23299.530) (-23278.504) -- 1:18:35  
868500 -- (-23217.854) (-23285.110) (-23263.372) (-23269.540) \* [-23225.558] (-23280.350) (-23306.980) (-23266.935) -- 1:18:17  
869000 -- (-23225.913) (-23310.277) (-23267.588) (-23268.382) \* [-23230.469] (-23300.872) (-23279.178) (-23254.153) -- 1:17:59  
869500 -- (-23214.789) (-23311.390) (-23278.381) (-23266.412) \* [-23239.969] (-23296.510) (-23288.585) (-23264.763) -- 1:17:41  
870000 -- (-23223.821) (-23338.311) (-23278.816) (-23270.044) \* [-23243.480] (-23294.548) (-23312.740) (-23263.296) -- 1:17:24

Average standard deviation of split frequencies: 0.015452

870500 -- (-23229.806) (-23344.401) (-23269.827) (-23257.315) \* [-23246.279] (-23277.445) (-23323.404) (-23257.017) -- 1:17:06  
871000 -- (-23225.068) (-23338.345) (-23263.585) (-23269.446) \* [-23252.985] (-23281.137) (-23342.174) (-23262.388) -- 1:16:48  
871500 -- (-23238.872) [-23337.720] (-23271.229) (-23283.004) \* [-23241.343] (-23288.966) (-23357.027) (-23254.805) -- 1:16:30  
872000 -- (-23255.510) (-23331.970) (-23287.135) (-23268.767) \* [-23243.213] (-23274.268) (-23359.692) (-23257.368) -- 1:16:12  
872500 -- (-23238.592) [-23328.619] (-23290.111) (-23263.503) \* [-23246.076] (-23276.101) (-23304.320) (-23260.127) -- 1:15:54  
873000 -- (-23222.587) (-23326.987) (-23273.607) (-23262.867) \* [-23230.618] (-23289.374) (-23314.980) (-23269.525) -- 1:15:37  
873500 -- (-23230.767) (-23305.111) (-23274.050) (-23252.721) \* [-23222.602] (-23291.000) (-23283.521) (-23277.428) -- 1:15:19  
874000 -- (-23233.469) (-23299.115) (-23272.793) (-23249.824) \* [-23222.708] (-23279.848) (-23299.042) (-23283.467) -- 1:15:01  
874500 -- (-23233.503) (-23294.221) (-23287.749) (-23252.482) \* [-23218.163] (-23306.468) (-23299.681) (-23292.087) -- 1:14:43  
875000 -- (-23233.035) (-23283.253) (-23295.300) (-23255.376) \* [-23214.010] (-23289.967) (-23301.115) (-23279.787) -- 1:14:25

Average standard deviation of split frequencies: 0.015426

875500 -- (-23247.853) (-23290.313) (-23291.935) (-23249.397) \* [-23218.247] (-23303.124) (-23325.563) (-23287.164) -- 1:14:07  
876000 -- (-23236.675) (-23274.345) (-23295.111) (-23270.852) \* [-23228.012] (-23317.168) (-23301.893) (-23273.390) -- 1:13:49  
876500 -- (-23241.519) (-23279.064) (-23271.660) (-23260.062) \* [-23230.768] (-23330.764) (-23284.785) (-23279.413) -- 1:13:31  
877000 -- (-23224.428) (-23273.528) (-23267.890) (-23270.549) \* [-23238.508] (-23327.579) (-23288.619) (-23272.593) -- 1:13:13  
877500 -- (-23223.019) (-23264.413) (-23267.274) (-23278.599) \* [-23246.911] (-23310.313) (-23267.338) (-23275.256) -- 1:12:55  
878000 -- (-23240.495) (-23275.489) (-23310.927) (-23278.231) \* [-23249.740] (-23302.875) (-23263.998) (-23283.786) -- 1:12:37  
878500 -- (-23239.392) (-23276.245) (-23323.200) (-23263.108) \* [-23252.618] (-23306.774) (-23262.541) (-23274.671) -- 1:12:19  
879000 -- (-23238.848) (-23277.935) (-23330.212) (-23277.030) \* [-23236.824] (-23309.994) (-23260.648) (-23270.811) -- 1:12:01  
879500 -- (-23236.182) (-23274.576) (-23332.407) (-23279.365) \* (-23253.140) (-23315.185) (-23228.505) (-23283.363) -- 1:11:44  
880000 -- (-23238.924) (-23265.217) (-23342.723) (-23281.606) \* [-23252.037] (-23326.646) (-23242.643) (-23306.073) -- 1:11:26

Average standard deviation of split frequencies: 0.015438

880500 -- (-23244.407) (-23262.709) (-23334.418) (-23284.395) \* [-23243.908] (-23318.818) (-23229.606) (-23285.753) -- 1:11:08  
881000 -- (-23258.427) (-23257.932) (-23311.012) (-23282.169) \* (-23255.637) (-23288.396) (-23229.237) (-23278.231) -- 1:10:50  
881500 -- (-23240.252) (-23239.918) (-23320.054) (-23280.115) \* (-23256.111) (-23297.889) (-23212.174) (-23273.961) -- 1:10:32  
882000 -- (-23238.255) (-23237.641) (-23335.043) (-23285.634) \* (-23246.845) (-23300.260) (-23224.629) (-23279.629) -- 1:10:14  
882500 -- (-23250.137) [-23241.199] (-23328.434) (-23306.086) \* [-23246.358] (-23302.563) (-23251.271) (-23294.597) -- 1:09:57  
883000 -- (-23279.046) [-23226.862] (-23345.114) (-23283.760) \* [-23248.413] (-23296.613) (-23240.184) (-23299.762) -- 1:09:39  
883500 -- (-23262.276) [-23231.265] (-23325.497) (-23297.821) \* (-23251.616) (-23317.966) (-23225.192) (-23283.289) -- 1:09:21  
884000 -- (-23269.020) (-23237.164) (-23343.405) (-23277.400) \* (-23264.912) (-23333.455) (-23242.476) (-23290.422) -- 1:09:03  
884500 -- (-23287.394) [-23243.114] (-23345.924) (-23304.041) \* (-23274.613) (-23330.409) (-23266.245) (-23272.534) -- 1:08:45  
885000 -- (-23274.440) (-23260.242) (-23349.304) (-23313.783) \* (-23295.853) (-23327.808) (-23258.700) (-23276.478) -- 1:08:27

Average standard deviation of split frequencies: 0.015546

885500 -- (-23268.090) (-23274.867) (-23363.261) (-23304.951) \* (-23275.063) (-23310.019) (-23253.794) (-23281.668) -- 1:08:09  
886000 -- (-23264.424) (-23261.775) (-23348.419) (-23301.046) \* (-23280.681) (-23302.927) [-23247.307] (-23278.222) -- 1:07:51  
886500 -- (-23264.504) (-23273.512) (-23343.818) (-23300.729) \* (-23262.466) (-23298.488) (-23241.877) [-23265.135] -- 1:07:33  
887000 -- (-23271.915) (-23266.242) (-23346.757) (-23320.425) \* (-23260.874) (-23288.757) (-23251.111) (-23284.814) -- 1:07:16  
887500 -- (-23263.657) (-23283.907) (-23366.052) (-23300.757) \* (-23261.789) (-23296.512) [-23247.155] (-23304.636) -- 1:06:58  
888000 -- (-23257.840) (-23255.286) (-23326.252) (-23321.225) \* (-23255.593) (-23318.520) (-23253.292) (-23286.220) -- 1:06:40  
888500 -- (-23271.693) (-23252.839) (-23335.302) (-23321.819) \* (-23262.724) (-23334.370) (-23257.612) (-23297.095) -- 1:06:22  
889000 -- (-23268.197) (-23227.123) (-23337.940) (-23309.132) \* (-23235.735) (-23343.053) (-23261.722) (-23314.999) -- 1:06:04  
889500 -- (-23283.813) (-23234.811) (-23312.823) (-23321.312) \* (-23253.722) (-23332.523) (-23271.493) (-23299.077) -- 1:05:46  
890000 -- (-23290.980) (-23235.451) (-23323.892) (-23310.521) \* [-23248.632] (-23336.240) (-23283.469) (-23279.682) -- 1:05:28

Average standard deviation of split frequencies: 0.015639

890500 -- (-23298.671) [-23231.152] (-23321.115) (-23318.009) \* [-23244.606] (-23319.629) (-23276.622) (-23264.517) -- 1:05:11  
891000 -- (-23276.237) (-23225.391) (-23313.307) (-23321.329) \* [-23237.698] (-23303.292) (-23282.944) (-23258.140) -- 1:04:53  
891500 -- (-23286.120) (-23233.768) (-23308.650) (-23322.854) \* (-23248.262) (-23319.337) (-23282.951) [-23262.315] -- 1:04:35  
892000 -- (-23262.682) (-23232.991) (-23299.525) (-23340.873) \* [-23247.697] (-23302.687) (-23299.643) (-23259.304) -- 1:04:17  
892500 -- (-23260.267) [-23231.071] (-23268.550) (-23324.951) \* [-23251.702] (-23318.404) (-23311.486) (-23257.585) -- 1:03:59

893000 -- (-23254.682) [-23243.391] (-23285.346) (-23319.742) \* [-23246.936] (-23341.905) (-23308.853) (-23256.878) -- 1:03:41  
893500 -- (-23259.923) [-23258.718] (-23276.556) (-23309.727) \* (-23243.954) (-23333.292) (-23299.662) [-23251.646] -- 1:03:23  
894000 -- (-23256.153) [-23237.233] (-23273.288) (-23305.940) \* [-23233.422] (-23323.934) (-23287.859) (-23265.437) -- 1:03:06  
894500 -- (-23254.165) [-23245.925] (-23286.790) (-23298.999) \* [-23225.251] (-23301.692) (-23280.240) (-23273.261) -- 1:02:48  
895000 -- (-23257.756) [-23232.251] (-23280.227) (-23308.965) \* [-23236.974] (-23291.863) (-23279.867) (-23267.795) -- 1:02:30

Average standard deviation of split frequencies: 0.015589

895500 -- (-23253.853) [-23219.584] (-23293.094) (-23288.454) \* [-23240.286] (-23286.491) (-23292.713) (-23291.161) -- 1:02:12  
896000 -- (-23258.094) [-23220.749] (-23262.693) (-23296.655) \* [-23233.527] (-23283.268) (-23294.209) (-23306.291) -- 1:01:54  
896500 -- (-23262.793) [-23226.454] (-23292.011) (-23295.390) \* [-23225.916] (-23278.467) (-23298.322) (-23314.135) -- 1:01:37  
897000 -- (-23258.686) [-23255.651] (-23281.616) (-23298.265) \* [-23236.568] (-23282.672) (-23283.758) (-23308.050) -- 1:01:19  
897500 -- (-23247.063) [-23267.800] (-23278.081) (-23321.263) \* [-23236.431] (-23283.195) (-23281.076) (-23268.847) -- 1:01:01  
898000 -- (-23243.815) [-23244.560] (-23269.055) (-23308.118) \* [-23224.870] (-23281.739) (-23269.320) (-23321.737) -- 1:00:43  
898500 -- (-23230.486) [-23266.894] (-23294.548) (-23325.425) \* [-23224.389] (-23286.745) (-23266.647) (-23322.053) -- 1:00:25  
899000 -- (-23226.064) [-23265.558] (-23275.288) (-23339.029) \* [-23231.116] (-23293.988) (-23272.012) (-23332.724) -- 1:00:08  
899500 -- (-23215.232) [-23279.160] (-23281.072) (-23321.060) \* [-23239.251] (-23286.697) (-23274.376) (-23319.217) -- 0:59:50  
900000 -- (-23227.458) [-23287.522] (-23293.874) (-23312.525) \* [-23270.719] (-23281.183) (-23297.746) (-23320.407) -- 0:59:32

Average standard deviation of split frequencies: 0.015667

900500 -- [-23222.271] (-23289.699) (-23301.669) (-23311.388) \* [-23274.841] (-23269.795) (-23313.399) (-23327.127) -- 0:59:14  
901000 -- [-23224.226] (-23284.280) (-23307.083) (-23319.976) \* [-23261.930] (-23263.014) (-23311.865) (-23307.785) -- 0:58:56  
901500 -- [-23227.033] (-23250.837) (-23310.656) (-23326.365) \* (-23243.641) (-23255.059) (-23284.846) (-23308.501) -- 0:58:39  
902000 -- [-23210.390] (-23239.536) (-23294.103) (-23314.639) \* [-23240.796] (-23233.860) (-23304.163) (-23312.278) -- 0:58:21  
902500 -- [-23219.938] (-23241.495) (-23278.449) (-23312.572) \* [-23222.529] (-23243.556) (-23319.763) (-23316.604) -- 0:58:03  
903000 -- [-23223.837] (-23246.349) (-23297.333) (-23310.683) \* (-23244.554) (-23236.003) (-23331.214) (-23312.732) -- 0:57:45  
903500 -- [-23229.816] (-23260.084) (-23309.737) (-23297.375) \* [-23265.136] (-23246.937) (-23334.148) (-23311.613) -- 0:57:27  
904000 -- [-23220.964] (-23257.448) (-23327.007) (-23294.991) \* [-23256.110] (-23260.144) (-23307.711) (-23297.032) -- 0:57:09  
904500 -- [-23220.549] (-23269.584) (-23324.529) (-23283.425) \* [-23256.883] (-23266.643) (-23302.092) (-23303.429) -- 0:56:51  
905000 -- [-23227.736] (-23274.175) (-23320.560) (-23294.796) \* (-23270.492) [-23261.187] (-23288.399) (-23298.919) -- 0:56:34

Average standard deviation of split frequencies: 0.015687

905500 -- [-23218.900] (-23256.694) (-23311.939) (-23298.066) \* (-23270.689) [-23264.440] (-23300.142) (-23288.285) -- 0:56:16  
906000 -- [-23224.199] (-23254.404) (-23339.647) (-23293.528) \* [-23246.428] (-23272.257) (-23310.487) (-23280.275) -- 0:55:58  
906500 -- [-23232.145] (-23236.207) (-23324.211) (-23284.791) \* [-23222.962] (-23261.690) (-23305.955) (-23295.773) -- 0:55:40  
907000 -- [-23219.345] (-23241.023) (-23310.407) (-23286.455) \* [-23237.866] (-23250.372) (-23318.487) (-23295.536) -- 0:55:22  
907500 -- [-23214.744] (-23256.974) (-23331.331) (-23282.188) \* [-23245.903] (-23243.719) (-23298.789) (-23286.576) -- 0:55:04  
908000 -- [-23232.874] (-23253.830) (-23327.355) (-23276.370) \* [-23232.988] (-23235.249) (-23289.025) (-23298.375) -- 0:54:46  
908500 -- [-23232.995] (-23244.275) (-23309.661) (-23281.062) \* (-23217.940) [-23233.274] (-23284.088) (-23292.197) -- 0:54:28  
909000 -- [-23229.616] (-23253.787) (-23310.679) (-23289.086) \* (-23227.401) [-23228.685] (-23283.034) (-23280.949) -- 0:54:10  
909500 -- (-23243.798) [-23251.724] (-23316.271) (-23283.260) \* (-23264.927) [-23239.178] (-23283.106) (-23269.408) -- 0:53:53  
910000 -- [-23251.132] (-23255.621) (-23293.714) (-23287.648) \* (-23254.252) [-23270.617] (-23291.412) (-23270.131) -- 0:53:35

Average standard deviation of split frequencies: 0.015709

910500 -- (-23254.293) [-23241.643] (-23273.723) (-23282.460) \* [-23232.832] (-23263.129) (-23313.952) (-23267.024) -- 0:53:17  
911000 -- (-23257.238) [-23248.774] (-23264.764) (-23272.482) \* [-23240.620] (-23270.728) (-23312.476) (-23273.034) -- 0:52:59  
911500 -- (-23268.696) [-23265.138] (-23287.920) (-23262.825) \* [-23234.035] (-23274.447) (-23317.654) (-23265.570) -- 0:52:41  
912000 -- (-23287.085) (-23273.583) (-23278.604) [-23241.891] \* [-23235.236] (-23297.623) (-23324.649) (-23262.589) -- 0:52:23  
912500 -- (-23289.445) (-23284.553) (-23268.571) [-23234.421] \* [-23233.637] (-23279.168) (-23311.821) (-23285.041) -- 0:52:05  
913000 -- (-23293.431) (-23281.109) [-23262.851] (-23247.844) \* [-23222.224] (-23278.740) (-23284.566) (-23281.004) -- 0:51:48  
913500 -- (-23304.430) (-23266.979) [-23238.460] (-23244.161) \* [-23219.988] (-23290.375) (-23296.600) (-23278.464) -- 0:51:30  
914000 -- (-23291.152) (-23267.530) (-23253.930) [-23233.423] \* [-23220.445] (-23296.152) (-23304.261) (-23267.515) -- 0:51:12  
914500 -- (-23303.365) [-23259.161] (-23258.023) (-23232.409) \* [-23230.762] (-23307.607) (-23323.802) (-23255.767) -- 0:50:54  
915000 -- (-23317.112) (-23265.887) [-23243.861] (-23241.974) \* [-23265.056] (-23315.234) (-23307.100) (-23280.139) -- 0:50:36

Average standard deviation of split frequencies: 0.015717

915500 -- (-23299.258) (-23257.104) [-23247.687] (-23259.032) \* [-23260.432] (-23290.038) (-23300.738) (-23258.995) -- 0:50:18  
916000 -- (-23286.447) [-23242.103] (-23263.794) (-23256.452) \* (-23257.675) (-23308.882) (-23299.386) [-23248.871] -- 0:50:00  
916500 -- (-23277.988) [-23258.259] (-23272.700) (-23246.465) \* (-23267.938) (-23314.913) (-23285.233) [-23241.951] -- 0:49:43  
917000 -- (-23276.045) [-23269.537] (-23306.232) (-23247.266) \* (-23247.870) (-23298.832) (-23302.956) [-23235.394] -- 0:49:25  
917500 -- (-23280.951) [-23266.847] (-23298.424) (-23246.640) \* (-23262.365) (-23281.313) (-23294.317) [-23251.367] -- 0:49:07  
918000 -- (-23297.754) (-23280.641) (-23299.776) [-23236.209] \* [-23261.865] (-23291.081) (-23309.935) (-23263.985) -- 0:48:49  
918500 -- (-23294.202) (-23290.667) (-23302.055) [-23243.795] \* [-23256.053] (-23281.682) (-23291.933) (-23247.782) -- 0:48:31  
919000 -- (-23303.570) (-23280.290) (-23290.894) [-23235.638] \* [-23241.855] (-23273.222) (-23297.600) (-23263.199) -- 0:48:13  
919500 -- (-23291.245) (-23267.906) (-23300.018) [-23254.470] \* [-23244.150] (-23275.622) (-23317.486) (-23275.785) -- 0:47:55  
920000 -- (-23272.752) (-23279.993) (-23293.334) (-23267.026) \* [-23245.375] (-23244.862) (-23322.064) (-23272.155) -- 0:47:38

Average standard deviation of split frequencies: 0.015751

920500 -- [-23252.033] (-23294.101) (-23281.696) (-23281.806) \* (-23238.010) [-23241.682] (-23312.336) (-23275.584) -- 0:47:20  
921000 -- (-23240.188) (-23280.961) [-23262.298] (-23283.743) \* (-23242.373) [-23233.345] (-23315.752) (-23271.192) -- 0:47:02  
921500 -- [-23231.802] (-23278.341) (-23249.286) (-23267.951) \* [-23241.120] (-23240.266) (-23319.585) (-23280.028) -- 0:46:44  
922000 -- [-23223.821] (-23290.992) (-23259.767) (-23269.548) \* [-23242.262] (-23216.831) (-23316.755) (-23290.006) -- 0:46:26  
922500 -- [-23229.210] (-23279.341) (-23262.731) (-23275.433) \* (-23258.206) [-23225.840] (-23320.630) (-23310.103) -- 0:46:08  
923000 -- (-23256.104) (-23292.813) (-23278.054) (-23294.813) \* (-23250.200) [-23220.497] (-23302.242) (-23307.006) -- 0:45:50  
923500 -- [-23248.622] (-23279.465) (-23274.659) (-23291.243) \* (-23255.097) [-23232.879] (-23315.321) (-23306.664) -- 0:45:33  
924000 -- (-23249.331) (-23265.631) (-23255.855) (-23279.586) \* (-23267.708) [-23243.407] (-23326.360) (-23318.135) -- 0:45:15  
924500 -- (-23258.232) (-23257.073) (-23265.632) (-23260.263) \* (-23266.391) [-23220.084] (-23350.773) (-23309.913) -- 0:44:57  
925000 -- (-23261.702) (-23264.030) (-23275.587) (-23273.467) \* (-23266.450) [-23222.465] (-23344.876) (-23277.743) -- 0:44:39

Average standard deviation of split frequencies: 0.015749

925500 -- [-23268.903] (-23263.989) (-23266.921) (-23288.695) \* (-23276.544) [-23230.669] (-23335.701) (-23271.281) -- 0:44:21  
926000 -- (-23279.168) [-23253.117] (-23269.200) (-23281.848) \* (-23271.833) [-23238.121] (-23331.419) (-23286.478) -- 0:44:03  
926500 -- (-23260.076) [-23249.944] (-23262.034) (-23273.816) \* (-23264.202) [-23235.996] (-23327.275) (-23271.998) -- 0:43:45  
927000 -- [-23235.501] (-23257.667) (-23276.793) (-23290.700) \* (-23266.707) [-23235.047] (-23311.467) (-23275.975) -- 0:43:28  
927500 -- [-23221.312] (-23253.951) (-23259.054) (-23305.370) \* (-23283.792) [-23254.338] (-23303.251) (-23271.427) -- 0:43:10  
928000 -- [-23233.885] (-23274.100) (-23268.865) (-23298.127) \* (-23277.863) [-23254.757] (-23305.545) (-23282.408) -- 0:42:52  
928500 -- [-23234.982] (-23286.622) (-23267.393) (-23302.992) \* (-23273.444) [-23246.511] (-23311.778) (-23268.597) -- 0:42:34  
929000 -- (-23235.894) (-23260.145) (-23263.584) (-23301.458) \* (-23278.502) (-23263.882) (-23326.282) [-23271.192] -- 0:42:16  
929500 -- [-23231.882] (-23251.954) (-23253.724) (-23294.288) \* (-23275.722) [-23244.285] (-23313.074) (-23290.457) -- 0:41:58  
930000 -- (-23241.072) (-23239.273) (-23269.648) (-23282.391) \* (-23252.236) [-23253.916] (-23298.529) (-23278.034) -- 0:41:40

Average standard deviation of split frequencies: 0.015808

930500 -- (-23255.417) [-23258.595] (-23311.371) (-23273.299) \* [-23275.284] (-23252.501) (-23292.514) (-23267.655) -- 0:41:22  
931000 -- [-23251.902] (-23264.599) (-23334.958) (-23285.528) \* (-23251.977) [-23245.431] (-23276.532) (-23288.046) -- 0:41:04  
931500 -- (-23254.652) (-23276.111) (-23309.106) (-23295.445) \* (-23249.947) [-23248.077] (-23274.542) (-23302.645) -- 0:40:47  
932000 -- [-23242.435] (-23260.778) (-23285.639) (-23303.304) \* (-23250.609) (-23238.978) (-23267.604) (-23314.701) -- 0:40:29  
932500 -- [-23243.565] (-23265.733) (-23288.940) (-23353.036) \* [-23242.940] (-23243.609) (-23270.317) (-23314.851) -- 0:40:11  
933000 -- [-23241.399] (-23273.283) (-23278.002) (-23336.042) \* (-23260.728) (-23240.747) (-23289.383) (-23319.870) -- 0:39:53  
933500 -- [-23232.154] (-23272.359) (-23295.766) (-23317.726) \* (-23273.631) [-23239.011] (-23276.494) (-23312.094) -- 0:39:35  
934000 -- [-23241.718] (-23286.202) (-23274.079) (-23312.993) \* (-23265.705) [-23232.917] (-23265.896) (-23294.292) -- 0:39:17  
934500 -- [-23241.169] (-23284.091) (-23279.466) (-23320.619) \* (-23274.670) (-23260.635) [-23259.739] (-23289.159) -- 0:38:59

935000 -- [-23239.350] (-23274.089) (-23273.322) (-23312.805) \* (-23283.438) (-23262.424) [-23251.647] (-23288.791) -- 0:38:41

Average standard deviation of split frequencies: 0.015835

935500 -- (-23251.624) [-23272.821] (-23262.113) (-23320.135) \* (-23296.334) (-23266.424) [-23246.342] (-23275.398) -- 0:38:24  
936000 -- [-23240.119] (-23270.052) (-23277.525) (-23316.894) \* (-23312.498) (-23272.882) [-23248.298] (-23285.682) -- 0:38:06  
936500 -- (-23270.652) [-23260.742] (-23271.945) (-23311.166) \* (-23299.671) (-23267.078) [-23256.117] (-23287.836) -- 0:37:48  
937000 -- (-23277.595) [-23252.221] (-23278.125) (-23310.730) \* (-23300.392) (-23284.169) [-23260.438] (-23285.462) -- 0:37:30  
937500 -- [-23271.623] (-23268.826) (-23289.617) (-23318.388) \* (-23304.427) (-23293.766) [-23251.991] (-23285.963) -- 0:37:12  
938000 -- (-23282.307) [-23283.863] (-23291.571) (-23343.588) \* (-23303.203) (-23287.216) [-23248.056] (-23296.570) -- 0:36:54  
938500 -- (-23289.661) [-23281.648] (-23313.253) (-23336.807) \* (-23310.164) (-23275.991) [-23262.082] (-23323.917) -- 0:36:36  
939000 -- (-23290.081) [-23289.226] (-23304.765) (-23344.353) \* (-23302.240) (-23287.215) [-23256.574] (-23348.049) -- 0:36:18  
939500 -- (-23264.733) (-23300.901) (-23292.209) (-23332.237) \* (-23314.254) (-23277.762) [-23256.037] (-23352.041) -- 0:36:01  
940000 -- [-23263.750] (-23281.014) (-23310.825) (-23321.034) \* (-23299.642) (-23252.044) [-23247.254] (-23352.193) -- 0:35:43

Average standard deviation of split frequencies: 0.015514

940500 -- [-23265.324] (-23285.149) (-23316.485) (-23312.835) \* (-23303.721) (-23269.984) [-23267.311] (-23330.850) -- 0:35:25  
941000 -- (-23261.869) [-23275.191] (-23302.085) (-23344.633) \* (-23284.805) (-23288.218) [-23256.417] (-23335.203) -- 0:35:07  
941500 -- (-23248.894) [-23258.861] (-23297.875) (-23341.297) \* (-23271.896) (-23261.269) [-23266.075] (-23328.456) -- 0:34:49  
942000 -- [-23230.004] (-23263.660) (-23287.931) (-23338.263) \* (-23254.783) (-23275.117) [-23272.716] (-23329.087) -- 0:34:31  
942500 -- [-23235.842] (-23282.878) (-23286.838) (-23340.038) \* (-23254.161) (-23287.738) (-23286.786) (-23322.953) -- 0:34:13  
943000 -- (-23251.205) [-23274.334] (-23281.272) (-23340.052) \* (-23256.180) (-23299.800) (-23284.881) (-23319.518) -- 0:33:56  
943500 -- (-23262.767) [-23253.415] (-23281.635) (-23318.525) \* (-23259.587) (-23299.430) (-23282.123) (-23332.047) -- 0:33:38  
944000 -- (-23287.415) [-23271.218] (-23280.983) (-23335.415) \* (-23248.279) (-23293.650) (-23283.832) (-23338.191) -- 0:33:20  
944500 -- (-23292.715) (-23276.781) [-23276.573] (-23330.950) \* (-23249.823) (-23304.460) (-23285.610) (-23303.476) -- 0:33:02  
945000 -- (-23287.350) [-23262.064] (-23277.308) (-23318.447) \* (-23237.544) (-23285.945) (-23263.353) (-23294.781) -- 0:32:44

Average standard deviation of split frequencies: 0.015289

945500 -- (-23304.286) [-23261.664] (-23263.667) (-23304.495) \* [-23239.287] (-23304.382) (-23265.030) (-23279.132) -- 0:32:26  
946000 -- (-23297.499) [-23253.480] (-23273.128) (-23286.976) \* (-23244.844) (-23308.134) [-23268.957] (-23290.545) -- 0:32:08  
946500 -- (-23306.533) (-23256.458) (-23260.166) (-23290.304) \* (-23272.726) (-23300.222) (-23275.046) [-23277.066] -- 0:31:50  
947000 -- (-23303.288) [-23247.648] (-23242.938) (-23296.827) \* [-23252.870] (-23314.456) (-23252.808) (-23301.866) -- 0:31:33  
947500 -- (-23299.991) [-23245.003] [-23240.544] (-23290.039) \* (-23259.743) (-23303.318) [-23240.899] (-23297.566) -- 0:31:15  
948000 -- (-23302.900) [-23249.047] (-23251.063) (-23295.163) \* (-23255.755) (-23292.511) [-23246.922] (-23308.161) -- 0:30:57  
948500 -- (-23304.637) [-23245.913] (-23256.219) (-23296.447) \* (-23263.776) (-23273.726) [-23224.911] (-23307.299) -- 0:30:39  
949000 -- (-23293.284) [-23240.659] (-23258.503) (-23296.220) \* (-23277.017) (-23272.296) [-23236.772] (-23311.667) -- 0:30:21  
949500 -- (-23305.226) (-23258.008) [-23243.103] (-23327.129) \* (-23269.990) (-23262.758) [-23222.139] (-23315.420) -- 0:30:03  
950000 -- (-23288.909) [-23253.809] (-23242.836) (-23304.132) \* (-23265.204) (-23261.925) [-23231.682] (-23311.607) -- 0:29:45

Average standard deviation of split frequencies: 0.014889

950500 -- (-23279.815) [-23255.770] (-23264.933) (-23316.210) \* (-23279.121) (-23261.221) [-23233.172] (-23317.708) -- 0:29:27  
951000 -- (-23278.025) [-23244.726] (-23281.017) (-23323.677) \* (-23276.893) (-23255.268) [-23263.770] (-23312.752) -- 0:29:09  
951500 -- (-23278.419) [-23240.938] (-23273.496) (-23319.357) \* (-23281.186) (-23257.803) [-23257.196] (-23320.560) -- 0:28:51  
952000 -- (-23276.630) [-23250.600] (-23281.954) (-23319.675) \* (-23273.234) (-23252.121) [-23260.096] (-23314.480) -- 0:28:33  
952500 -- (-23283.162) [-23247.587] (-23260.842) (-23320.154) \* (-23262.317) (-23225.361) (-23260.003) (-23290.732) -- 0:28:16  
953000 -- (-23260.694) [-23254.789] (-23256.178) (-23328.997) \* (-23284.660) (-23239.037) (-23250.767) (-23287.964) -- 0:27:58  
953500 -- [-23243.882] (-23246.889) (-23277.433) (-23330.289) \* (-23274.013) (-23255.192) (-23249.773) (-23308.700) -- 0:27:40  
954000 -- (-23260.590) [-23233.550] (-23284.121) (-23298.896) \* (-23291.876) (-23262.313) (-23250.960) (-23322.862) -- 0:27:22  
954500 -- (-23260.230) [-23241.719] (-23271.720) (-23297.879) \* (-23284.955) (-23257.825) [-23244.266] (-23316.059) -- 0:27:04  
955000 -- (-23266.469) [-23259.702] (-23284.191) (-23309.982) \* (-23306.674) (-23271.805) [-23245.801] (-23306.829) -- 0:26:46

Average standard deviation of split frequencies: 0.014515

955500 -- [-23263.541] (-23254.917) (-23281.340) (-23292.987) \* (-23296.060) (-23269.433) [-23240.154] (-23308.689) -- 0:26:28  
956000 -- (-23275.003) [-23254.574] (-23287.151) (-23312.849) \* (-23299.056) (-23271.318) [-23239.487] (-23304.059) -- 0:26:10  
956500 -- (-23282.671) [-23247.246] (-23263.567) (-23309.962) \* (-23314.570) (-23263.366) [-23240.201] (-23294.484) -- 0:25:52  
957000 -- (-23278.037) [-23246.393] (-23256.717) (-23318.162) \* (-23310.460) (-23282.442) [-23260.182] (-23282.117) -- 0:25:35  
957500 -- (-23283.220) [-23259.351] [-23272.108] (-23348.022) \* (-23300.517) (-23270.172) [-23259.555] (-23297.036) -- 0:25:17  
958000 -- (-23276.240) [-23237.602] (-23257.825) (-23332.096) \* (-23296.443) (-23259.913) (-23264.301) (-23289.738) -- 0:24:59  
958500 -- (-23277.701) [-23235.288] (-23272.294) (-23317.073) \* (-23309.170) (-23261.818) (-23254.512) (-23312.257) -- 0:24:41  
959000 -- (-23296.045) [-23239.571] (-23288.046) (-23306.947) \* (-23299.882) (-23263.616) [-23257.985] (-23331.666) -- 0:24:23  
959500 -- (-23318.122) [-23222.023] (-23283.136) (-23306.808) \* (-23305.245) (-23256.292) (-23250.243) (-23328.376) -- 0:24:05  
960000 -- (-23315.987) [-23224.672] (-23271.883) (-23299.864) \* (-23269.716) (-23253.171) [-23254.861] (-23308.459) -- 0:23:47

Average standard deviation of split frequencies: 0.014359

960500 -- (-23303.823) [-23223.674] (-23266.424) (-23309.996) \* (-23265.799) (-23255.991) [-23253.792] (-23320.722) -- 0:23:30  
961000 -- (-23276.117) [-23217.788] (-23272.341) (-23317.602) \* (-23269.824) (-23254.948) [-23247.914] (-23329.168) -- 0:23:12  
961500 -- (-23285.688) [-23232.804] (-23274.827) (-23310.316) \* (-23241.613) [-23244.974] (-23270.320) (-23313.624) -- 0:22:54  
962000 -- (-23267.788) [-23228.959] (-23277.467) (-23299.382) \* (-23240.730) (-23252.568) (-23277.102) (-23307.679) -- 0:22:36  
962500 -- (-23279.172) [-23227.804] (-23300.518) (-23308.912) \* (-23242.339) (-23262.712) (-23260.254) (-23309.664) -- 0:22:18  
963000 -- (-23271.247) [-23228.712] (-23301.214) (-23300.122) \* (-23248.177) (-23269.244) (-23265.347) (-23290.958) -- 0:22:00  
963500 -- (-23254.039) [-23222.536] (-23292.819) (-23320.585) \* (-23258.842) (-23266.160) (-23274.717) (-23295.327) -- 0:21:42  
964000 -- (-23257.823) [-23204.790] (-23294.235) (-23310.151) \* (-23259.336) (-23254.636) (-23293.497) (-23299.349) -- 0:21:24  
964500 -- (-23253.081) [-23218.376] (-23280.857) (-23320.390) \* (-23269.925) (-23255.475) (-23266.735) (-23309.233) -- 0:21:07  
965000 -- (-23248.917) [-23225.900] (-23285.141) (-23313.503) \* (-23281.716) (-23262.903) (-23277.130) (-23317.074) -- 0:20:49

Average standard deviation of split frequencies: 0.014325

965500 -- (-23265.406) [-23221.984] (-23292.421) (-23298.875) \* (-23273.626) (-23253.560) [-23262.392] (-23309.270) -- 0:20:31  
966000 -- (-23268.505) [-23225.313] (-23299.833) (-23306.096) \* (-23289.297) (-23226.431) (-23276.193) (-23325.210) -- 0:20:13  
966500 -- (-23271.077) [-23254.546] (-23294.549) (-23292.616) \* (-23267.550) [-23241.631] (-23277.778) (-23339.957) -- 0:19:55  
967000 -- (-23292.905) [-23268.601] (-23274.604) (-23292.845) \* (-23293.079) (-23237.892) (-23278.919) (-23336.420) -- 0:19:37  
967500 -- (-23282.613) [-23251.452] (-23258.099) (-23294.449) \* (-23278.817) (-23230.966) (-23275.885) (-23323.846) -- 0:19:20  
968000 -- (-23281.238) [-23241.802] (-23251.413) (-23306.344) \* (-23257.320) (-23228.663) (-23278.377) (-23331.659) -- 0:19:02  
968500 -- (-23287.564) [-23254.923] (-23257.170) (-23303.908) \* (-23269.767) [-23243.575] (-23301.795) (-23323.657) -- 0:18:44  
969000 -- (-23308.103) (-23272.355) [-23261.691] (-23285.146) \* (-23260.028) (-23245.497) (-23315.711) (-23302.269) -- 0:18:26  
969500 -- (-23320.779) (-23283.063) (-23240.980) (-23275.564) \* [-23246.715] (-23252.878) (-23316.622) (-23287.440) -- 0:18:08  
970000 -- (-23300.654) (-23264.998) [-23244.960] (-23283.320) \* (-23236.485) (-23267.675) (-23309.530) (-23292.756) -- 0:17:50

Average standard deviation of split frequencies: 0.014405

970500 -- (-23313.387) (-23266.192) [-23229.388] (-23283.556) \* [-23242.069] (-23261.576) (-23318.378) (-23296.026) -- 0:17:33  
971000 -- (-23312.187) (-23268.292) [-23213.605] (-23251.521) \* [-23239.337] (-23257.143) (-23333.154) (-23308.401) -- 0:17:15  
971500 -- (-23298.915) (-23278.562) (-23216.784) (-23256.972) \* [-23233.738] (-23257.858) (-23315.537) (-23300.095) -- 0:16:57  
972000 -- (-23310.166) (-23287.268) [-23217.872] (-23255.531) \* [-23232.565] (-23264.678) (-23321.144) (-23296.087) -- 0:16:39  
972500 -- (-23307.015) (-23267.470) [-23226.679] (-23237.277) \* [-23216.128] (-23268.006) (-23313.850) (-23256.643) -- 0:16:21  
973000 -- (-23307.419) (-23275.470) [-23226.525] (-23250.067) \* [-23230.822] (-23255.589) (-23313.205) (-23248.533) -- 0:16:03  
973500 -- (-23329.327) (-23264.517) [-23247.681] (-23249.686) \* [-23226.311] (-23258.861) (-23309.877) (-23249.022) -- 0:15:46  
974000 -- (-23338.653) (-23271.036) [-23255.429] (-23265.401) \* [-23238.860] (-23279.474) (-23302.871) (-23249.438) -- 0:15:28  
974500 -- (-23337.551) (-23269.881) [-23242.608] (-23265.650) \* (-23249.175) (-23269.336) (-23292.231) (-23266.012) -- 0:15:10  
975000 -- (-23326.176) (-23258.616) (-23261.257) [-23265.497] \* [-23245.325] (-23265.231) (-23305.777) (-23263.849) -- 0:14:52

Average standard deviation of split frequencies: 0.014421

975500 -- (-23342.443) (-23266.158) (-23253.446) [-23251.916] \* [-23248.724] (-23269.798) (-23290.442) (-23292.938) -- 0:14:34  
976000 -- (-23330.470) (-23252.229) (-23254.290) [-23238.363] \* [-23247.643] (-23282.451) (-23307.182) (-23269.702) -- 0:14:16  
976500 -- (-23322.767) (-23272.512) [-23242.199] (-23264.684) \* [-23266.215] (-23283.779) (-23296.018) (-23236.244) -- 0:13:59  
977000 -- (-23317.910) (-23285.276) (-23250.128) [-23256.483] \* [-23261.957] (-23284.988) (-23290.893) [-23243.609] -- 0:13:41  
977500 -- (-23327.766) (-23278.872) (-23248.430) [-23240.447] \* (-23256.910) (-23285.060) (-23289.947) [-23245.885] -- 0:13:23  
978000 -- (-23340.644) (-23286.551) (-23242.370) [-23257.244] \* (-23248.648) (-23270.099) (-23280.266) [-23239.644] -- 0:13:05  
978500 -- (-23345.811) (-23280.938) (-23244.405) [-23258.527] \* [-23252.654] (-23266.874) (-23278.058) (-23242.643) -- 0:12:47  
979000 -- (-23315.428) (-23272.697) [-23238.581] (-23263.455) \* [-23251.531] (-23255.702) (-23294.927) (-23249.562) -- 0:12:29  
979500 -- (-23317.848) (-23259.032) (-23252.557) [-23256.893] \* [-23253.781] (-23261.099) (-23279.215) (-23260.412) -- 0:12:11  
980000 -- (-23312.044) (-23254.268) (-23259.432) [-23263.601] \* (-23267.975) (-23270.424) (-23268.967) [-23245.360] -- 0:11:54

Average standard deviation of split frequencies: 0.014426

980500 -- (-23324.802) [-23251.142] (-23272.462) (-23271.346) \* [-23260.284] (-23301.224) (-23264.062) (-23250.126) -- 0:11:36  
981000 -- (-23320.131) (-23246.564) [-23260.464] (-23276.853) \* [-23239.750] (-23317.709) (-23269.338) (-23239.322) -- 0:11:18  
981500 -- (-23328.430) [-23258.741] (-23255.031) (-23291.661) \* [-23227.488] (-23322.482) (-23281.183) (-23241.229) -- 0:11:00  
982000 -- (-23350.924) (-23276.050) [-23256.616] (-23297.927) \* [-23225.864] (-23318.155) (-23282.151) (-23260.788) -- 0:10:42  
982500 -- (-23354.744) (-23265.880) [-23264.790] (-23274.243) \* (-23241.477) (-23299.063) (-23284.768) [-23256.930] -- 0:10:24  
983000 -- (-23351.197) [-23250.914] (-23268.871) (-23290.837) \* (-23240.220) (-23295.994) (-23270.608) [-23255.794] -- 0:10:07  
983500 -- (-23335.003) [-23236.600] (-23279.189) (-23287.242) \* (-23232.357) (-23291.252) (-23269.805) [-23256.574] -- 0:09:49  
984000 -- (-23328.637) [-23244.617] (-23269.500) (-23297.576) \* [-23224.195] (-23292.295) (-23282.423) (-23259.219) -- 0:09:31  
984500 -- (-23315.056) [-23259.335] (-23258.878) (-23298.554) \* [-23236.031] (-23287.048) (-23294.479) (-23274.139) -- 0:09:13  
985000 -- (-23309.244) [-23244.358] (-23245.823) (-23296.875) \* [-23237.673] (-23274.123) (-23296.282) (-23285.580) -- 0:08:55

Average standard deviation of split frequencies: 0.014269

985500 -- (-23319.580) (-23240.074) [-23241.143] (-23296.738) \* [-23244.907] (-23271.801) (-23298.917) (-23290.318) -- 0:08:37  
986000 -- (-23349.605) (-23271.203) [-23245.971] (-23295.096) \* [-23275.371] (-23264.735) (-23293.369) (-23293.242) -- 0:08:19  
986500 -- (-23362.682) (-23266.015) [-23252.734] (-23280.158) \* [-23264.740] (-23259.493) (-23296.524) (-23280.241) -- 0:08:02  
987000 -- (-23349.664) (-23270.735) (-23249.877) [-23270.127] \* (-23264.261) [-23272.469] (-23300.229) (-23260.419) -- 0:07:44  
987500 -- (-23353.251) (-23271.539) (-23250.978) [-23252.761] \* (-23260.881) (-23271.997) (-23317.774) (-23256.937) -- 0:07:26  
988000 -- (-23344.651) (-23280.274) [-23243.903] (-23275.032) \* (-23285.791) [-23262.518] (-23314.030) (-23263.761) -- 0:07:08  
988500 -- (-23325.967) (-23279.289) (-23254.822) [-23272.672] \* (-23276.232) (-23267.649) (-23303.211) (-23251.304) -- 0:06:50  
989000 -- (-23341.474) (-23273.754) (-23255.506) [-23266.317] \* (-23254.780) (-23284.064) (-23308.178) [-23247.371] -- 0:06:32  
989500 -- (-23335.303) (-23284.590) (-23244.200) [-23241.871] \* [-23237.859] (-23304.787) (-23275.914) (-23239.852) -- 0:06:14  
990000 -- (-23320.049) (-23282.902) [-23223.797] (-23225.935) \* [-23257.995] (-23317.885) (-23283.295) (-23271.260) -- 0:05:57

Average standard deviation of split frequencies: 0.014083

990500 -- (-23325.264) (-23275.108) [-23231.374] (-23258.847) \* [-23257.144] (-23323.614) (-23291.328) (-23256.540) -- 0:05:39  
991000 -- (-23306.104) (-23293.967) [-23231.590] (-23255.435) \* (-23254.323) (-23317.957) (-23293.031) [-23254.067] -- 0:05:21  
991500 -- (-23288.576) (-23304.964) [-23237.026] (-23265.343) \* [-23256.011] (-23310.437) (-23294.974) (-23258.229) -- 0:05:03  
992000 -- (-23304.487) (-23277.749) [-23228.157] (-23264.201) \* [-23249.415] (-23289.655) (-23295.243) (-23261.407) -- 0:04:45  
992500 -- (-23298.904) (-23267.504) [-23227.309] (-23278.022) \* (-23254.356) (-23313.572) (-23294.399) [-23268.131] -- 0:04:27  
993000 -- (-23291.028) (-23279.032) [-23219.027] (-23283.336) \* [-23248.816] (-23322.321) (-23297.498) (-23274.845) -- 0:04:09  
993500 -- (-23275.627) (-23276.628) [-23222.782] (-23284.157) \* [-23240.511] (-23312.644) (-23301.344) (-23276.236) -- 0:03:52  
994000 -- (-23297.854) (-23261.817) [-23233.949] (-23280.106) \* [-23220.351] (-23286.348) (-23302.923) (-23272.856) -- 0:03:34  
994500 -- (-23315.221) (-23258.357) [-23233.368] (-23284.666) \* [-23210.871] (-23289.195) (-23293.268) (-23255.800) -- 0:03:16  
995000 -- (-23309.484) (-23263.302) [-23235.555] (-23295.904) \* [-23220.325] (-23283.432) (-23289.651) (-23269.267) -- 0:02:58

Average standard deviation of split frequencies: 0.013975

995500 -- (-23313.149) (-23275.394) [-23236.330] (-23290.623) \* [-23222.253] (-23288.873) (-23317.687) (-23264.911) -- 0:02:40  
996000 -- (-23312.767) (-23275.824) [-23243.058] (-23333.910) \* [-23241.488] (-23316.086) (-23305.000) (-23267.091) -- 0:02:22  
996500 -- (-23305.131) [-23274.571] (-23265.961) (-23326.877) \* (-23246.608) (-23305.317) (-23296.698) [-23278.422] -- 0:02:04  
997000 -- (-23300.533) [-23248.724] (-23279.401) (-23311.796) \* [-23242.016] (-23308.661) (-23312.369) (-23267.051) -- 0:01:47  
997500 -- (-23289.379) (-23264.517) (-23248.535) (-23313.272) \* [-23231.236] (-23307.655) (-23299.056) (-23250.530) -- 0:01:29  
998000 -- (-23290.863) (-23269.890) (-23241.940) (-23329.976) \* [-23231.999] (-23300.142) (-23285.294) (-23266.153) -- 0:01:11  
998500 -- (-23272.847) (-23263.854) (-23235.366) (-23315.233) \* [-23229.961] (-23293.933) (-23290.052) (-23274.127) -- 0:00:53  
999000 -- (-23293.243) (-23252.630) (-23239.228) (-23315.671) \* [-23226.124] (-23296.839) (-23271.843) (-23268.602) -- 0:00:35  
999500 -- (-23304.581) [-23239.779] (-23243.926) (-23297.370) \* [-23240.159] (-23277.292) (-23268.596) (-23293.720) -- 0:00:17  
1000000 -- (-23330.264) [-23251.354] (-23230.773) (-23294.003) \* [-23234.609] (-23265.566) (-23271.204) (-23313.849) -- 0:00:00

Average standard deviation of split frequencies: 0.014065

Continue with analysis? (yes/no):

RECEIVED CMD: no

Analysis completed in 9 hours 55 mins 1 seconds

Analysis used 35616.63 seconds of CPU time

Likelihood of best state for "cold" chain of run 1 was -23191.65

Likelihood of best state for "cold" chain of run 2 was -23198.89

Acceptance rates for the moves in the "cold" chain of run 1:

| With prob. | (last 100) | chain accepted proposals by move |
|------------|------------|----------------------------------|
| 19.2 %     | ( 24 %)    | ExtSPR(Tau,V)                    |
| 6.6 %      | ( 1 %)     | ExtTBR(Tau,V)                    |
| 22.8 %     | ( 19 %)    | NNI(Tau,V)                       |
| 19.8 %     | ( 18 %)    | ParsSPR(Tau,V)                   |
| 26.5 %     | ( 24 %)    | Multiplier(V)                    |
| 44.3 %     | ( 41 %)    | Nodeslider(V)                    |

Acceptance rates for the moves in the "cold" chain of run 2:

| With prob. | (last 100) | chain accepted proposals by move |
|------------|------------|----------------------------------|
| 19.0 %     | ( 11 %)    | ExtSPR(Tau,V)                    |
| 6.6 %      | ( 11 %)    | ExtTBR(Tau,V)                    |
| 22.8 %     | ( 23 %)    | NNI(Tau,V)                       |
| 19.6 %     | ( 20 %)    | ParsSPR(Tau,V)                   |
| 26.6 %     | ( 30 %)    | Multiplier(V)                    |
| 44.1 %     | ( 44 %)    | Nodeslider(V)                    |

Chain swap information for run 1:

|   | 1    | 2    | 3    | 4 |
|---|------|------|------|---|
| 1 | 0.29 | 0.04 | 0.00 |   |

Chain swap information for run 2:

The output first includes a key to all the bipartitions with frequency larger or equal to (Minpartfreq) in at least one run. Minpartfreq is a parameter to sumt command and currently it is set to 0.10. This is followed by a table with statistics for the informative bipartitions (those including at least two taxa), sorted from highest to lowest probability. For each bipartition, the table gives the number of times the partition or split was observed in all runs (#obs) and the posterior probability of the bipartition (Probab.), which is the same as the split frequency. If several runs are summarized, this is

followed by the minimum split frequency (Min(s)), the maximum frequency (Max(s)), and the standard deviation of frequencies (Stddev(s)) across runs. The latter value should approach 0 for all bipartitions as MCMC runs converge.

This is followed by a table summarizing branch lengths, node heights (if a clock model was used) and relaxed clock parameters (if a relaxed clock model was used). The mean, variance, and 95 % credible interval are given for each of these parameters. If several runs are summarized, the potential scale reduction factor (PSRF) is also given; it should approach 1 as runs converge. Node heights will take calibration points into account, if such points were used in the analysis.

Note that Stddev may be unreliable if the partition is not present in all runs (the last column indicates the number of runs that sampled the partition if more than one run is summarized). The PSRF is not calculated at all if the partition is not present in all runs. The PSRF is also sensitive to small sample sizes and it should only be considered a rough guide to convergence since some of the assumptions allowing one to interpret it as a true potential scale reduction factor are violated in MrBayes.

List of taxa in bipartitions:

```
1 -- 139_vCCI_V
2 -- 140_vCCI_V
3 -- 129_vCCI_V
4 -- 130_vCCI_V
5 -- 155_vCCI_V
6 -- 156_vCCI_V
7 -- 143_vCCI_C
8 -- 144_vCCI_C
9 -- 133_vCCI_C
10 -- 141_vCCI_C
11 -- 134_vCCI_V
12 -- 135_vCCI_V
13 -- 142_vCCI_R
14 -- 136_vCCI_V
15 -- 131_vCCI_E
16 -- 132_vCCI_E
17 -- 149_vCCI_C
18 -- 152_vCCI_C
19 -- 153_vCCI_C
20 -- 154_vCCI_C
21 -- 137_vCCI_H
22 -- 138_vCCI_H
23 -- 150_vCCI_M
24 -- 151_vCCI_M
25 -- 147_vCCI_M
26 -- 148_vCCI_M
27 -- 145_vCCI_M
28 -- 146_vCCI_M
29 -- 3_A41like_
30 -- 4_A41like_
31 -- 5_A41_MPXV
32 -- 6_A41_MPXV
33 -- 17_A41_CPX
34 -- 18_A41_CPX
35 -- 7_A41_VARV
36 -- 10_A41_VAR
37 -- 11_A41_VAR
38 -- 12_A41_VAR
39 -- 9_A41_VARV
40 -- 8_A41_VARV
41 -- 13_A41_TAT
42 -- 16_A41_CPX
43 -- 15_A41_HSP
44 -- 20_A41_VAC
45 -- 14_A41_CML
46 -- 19_A41_ECT
47 -- 80_GIF_ORF
48 -- 82_GIF_PCP
49 -- 21_BPSVgOR
50 -- 81_GIF_SB8
51 -- 75_CBP_ORF
52 -- 79_CPB_PCP
53 -- 76_CBP_BPS
54 -- 77_CPB_SB8
55 -- 78_CPB_SB8
56 -- 109_T4like
57 -- 112_T4like
58 -- 110_T4like
59 -- 111_T4like
```

60 -- 113\_T4like  
61 -- 114\_T4like  
62 -- 115\_T4like  
63 -- 116\_T4like  
64 -- 117\_T4\_MYX  
65 -- 118\_T4\_MYX  
66 -- 119\_T4\_DPX  
67 -- 120\_T4\_DPX  
68 -- 121\_T4\_LSD  
69 -- 122\_T4\_LSD  
70 -- 123\_T4\_SPP  
71 -- 124\_T4\_SPP  
72 -- 125\_T4\_GTP  
73 -- 126\_T4\_GTP  
74 -- 127\_T4\_GTP  
75 -- 128\_T4\_GTP  
76 -- 24\_C8\_VACV  
77 -- 25\_C8\_HSPV  
78 -- 22\_C8\_CPXV  
79 -- 23\_C8\_CMLV  
80 -- 26\_C8\_CPXV  
81 -- 27\_C8\_CPXV  
82 -- 98\_SCP3\_MP  
83 -- 99\_SCP3\_MP  
84 -- 101\_SCP3\_H  
85 -- 106\_SCP3\_V  
86 -- 102\_SCP3\_C  
87 -- 105\_SCP3\_E  
88 -- 100\_SCP3\_T  
89 -- 104\_SCP3\_C  
90 -- 103\_SCP3\_C  
91 -- 84\_SCP1\_MP  
92 -- 85\_SCP1\_MP  
93 -- 90\_SCP1\_CP  
94 -- 87\_SCP1\_VA  
95 -- 86\_SCP1\_CP  
96 -- 91\_SCP1\_HS  
97 -- 88\_SCP1\_CP  
98 -- 89\_SCP1\_TA  
99 -- 92\_SCP1\_CM  
100 -- 107\_SCPlk  
101 -- 108\_SCPlk  
102 -- 30\_CrmB\_MP  
103 -- 31\_CrmB\_MP  
104 -- 32\_CrmB\_MP  
105 -- 33\_CrmB\_MP  
106 -- 40\_CrmB\_CM  
107 -- 41\_CrmB\_CM  
108 -- 44\_CrmB\_CP  
109 -- 45\_CrmB\_CP  
110 -- 42\_CrmB\_HS  
111 -- 43\_CrmB\_HS  
112 -- 48\_CrmB\_CP  
113 -- 49\_CrmB\_CP  
114 -- 36\_CrmB\_VA  
115 -- 38\_CrmB\_VA  
116 -- 34\_CrmB\_VA  
117 -- 37\_CrmB\_VA  
118 -- 35\_CrmB\_VA  
119 -- 39\_CrmB\_VA  
120 -- 46\_CrmB\_CP  
121 -- 47\_CrmB\_CP  
122 -- 52\_CrmD\_CP  
123 -- 53\_CrmD\_CP  
124 -- 54\_CrmD\_EC  
125 -- 55\_CrmD\_EC  
126 -- 93\_SCP2\_CP  
127 -- 95\_SCP2\_CP  
128 -- 96\_SCP2\_CP  
129 -- 94\_SCP2\_EC  
130 -- 50\_CrmB\_MY  
131 -- 51\_CrmB\_MY  
132 -- 97\_SCP2\_CO  
133 -- 1\_M2\_CPXV\_  
134 -- 2\_M2\_CPXV\_  
135 -- 61\_M2\_VARV  
136 -- 64\_M2\_VARV  
137 -- 63\_M2\_VARV  
138 -- 71\_M2\_VARV  
139 -- 69\_M2\_VARV  
140 -- 70\_M2\_VARV



```

141 -- 65_M2_TATV
142 -- 62_M2_CMLV
143 -- 66_M2_MPXV
144 -- 67_M2_MPXV
145 -- 68_M2_HSPV
146 -- 72_M2_VACV
147 -- 60_M2_COTV
148 -- 73_M2_YKV_
149 -- 74_M2_MYXV
150 -- 58_M2like_
151 -- 59_M2like_
152 -- 83_SB87_gp
153 -- 29_CPXV_GE
154 -- 57_M2like_
155 -- 28_COTV030
156 -- 56_DPXV_W8

```

Key to taxon bipartitions (saved to file "/infile\_converted.phy.parts"):

ID -- Partition

```

-----
1 -- .*****
2 -- .*.....
3 -- ..*.....
4 -- ...*.....
5 -- ....*.....
6 -- .....*.....
7 -- .....*.....
8 -- .....*.....
9 -- .....*.....
10 -- .....*.....
11 -- .....*.....
12 -- .....*.....
13 -- .....*.....
14 -- .....*.....
15 -- .....*.....
16 -- .....*.....
17 -- .....*.....
18 -- .....*.....
19 -- .....*.....
20 -- .....*.....
21 -- .....*.....
22 -- .....*.....
23 -- .....*.....
24 -- .....*.....
25 -- .....*.....
26 -- .....*.....
27 -- .....*.....
28 -- .....*.....
29 -- .....*.....
30 -- .....*.....
31 -- .....*.....
32 -- .....*.....
33 -- .....*.....
34 -- .....*.....
35 -- .....*.....
36 -- .....*.....
37 -- .....*.....
38 -- .....*.....
39 -- .....*.....
40 -- .....*.....
41 -- .....*.....
42 -- .....*.....
43 -- .....*.....
44 -- .....*.....
45 -- .....*.....
46 -- .....*.....
47 -- .....*.....
48 -- .....*.....
49 -- .....*.....
50 -- .....*.....
51 -- .....*.....
52 -- .....*.....
53 -- .....*.....
54 -- .....*.....
55 -- .....*.....
56 -- .....*.....
57 -- .....*.....
58 -- .....*.....
59 -- .....*.....
60 -- .....*.....

```

61 -- .....\*

62 -- .....\*

63 -- .....\*

64 -- .....\*

65 -- .....\*

66 -- .....\*

67 -- .....\*

68 -- .....\*

69 -- .....\*

70 -- .....\*

71 -- .....\*

72 -- .....

73 -- .....

74 -- .....

75 -- .....

76 -- .....

77 -- .....

78 -- .....

79 -- .....

80 -- .....

81 -- .....

82 -- .....

83 -- .....

84 -- .....\*

85 -- .....

86 -- .....

87 -- .....

88 -- .....

89 -- .....

90 -- .....

91 -- .....

92 -- .....

93 -- .....

94 -- .....

95 -- .....

96 -- .....

97 -- .....

98 -- .....

99 -- .....

100 -- .....

101 -- .....

102 -- .....

103 -- .....

104 -- .....

105 -- .....

106 -- .....

107 -- .....

108 -- .....

109 -- .....

110 -- .....

111 -- .....

112 -- .....

113 -- .....

114 -- .....

115 -- .....

116 -- .....

117 -- .....

118 -- .....

119 -- .....

120 -- .....

121 -- .....

122 -- .....

123 -- .....

124 -- .....

125 -- .....

126 -- .....

127 -- .....

128 -- .....

129 -- .....

130 -- .....

131 -- .....

132 -- .....

133 -- .....

134 -- .....

135 -- .....

136 -- .....

137 -- .....

138 -- .....

139 -- .....

140 -- .....

141 -- .....

```
142 -- .....
143 -- .....
144 -- .....
145 -- .....
146 -- .....
147 -- .....
148 -- .....
149 -- .....
150 -- .....
151 -- .....
152 -- .....
153 -- .....
154 -- .....
155 -- .....
156 -- .....
157 -- .....*****
158 -- .....
159 -- .....
160 -- .....
161 -- .....**
162 -- .....*****
163 -- .....*****
164 -- .....**
165 -- .....****
166 -- .....*****
167 -- .....****
168 -- .....*****
169 -- .....*****
170 -- .....**
171 -- .....**
172 -- .....**
173 -- .....**
174 -- .....****
175 -- .....
176 -- .....
177 -- .....
178 -- .....**
179 -- .....*****
180 -- .....
181 -- .....
182 -- .....*****
183 -- .....
184 -- .....
185 -- .....
186 -- .....
187 -- .....
188 -- .....*****
189 -- .....
190 -- .....**
191 -- .....
192 -- .....
193 -- .....**
194 -- .....
195 -- .....
196 -- .....
197 -- .....**
198 -- .....**
199 -- .....**
200 -- .....
201 -- .....
202 -- .....**
203 -- .....
204 -- .....**
205 -- .....
206 -- .....***
207 -- .....
208 -- .....
209 -- .....
210 -- .....
211 -- .....
212 -- .....**
213 -- .....
214 -- .....
215 -- .....
216 -- .....
217 -- .....****
218 -- .....
219 -- .....
220 -- .....**
221 -- .....**
222 -- .....
```

223 -- ..... \*\* .....  
224 -- .....  
225 -- ..... \*\* .....  
226 -- ..... \*\* .....  
227 -- ..... \*\*\*\*\* .....  
228 -- .....  
229 -- ..... \*\*\*\*\* .....  
230 -- .....  
231 -- ..... \*\* .....  
232 -- .....  
233 -- ..... \*\*\*\*\* .....  
234 -- ..... \*\*\*\*\* .....  
235 -- .....  
236 -- .....  
237 -- .....  
238 -- .....  
239 -- .....  
240 -- .....  
241 -- .....  
242 -- ..... \*\*\*\*\* .....  
243 -- .....  
244 -- ..... \*\* .....  
245 -- .....  
246 -- ..... \*\*\*\*\* \*\* .....  
247 -- .....  
248 -- ..... \*\* .....  
249 -- ..... \*\* .....  
250 -- .....  
251 -- ..... \*\*\*\*\* .....  
252 -- .....  
253 -- .....  
254 -- .....  
255 -- .....  
256 -- .....  
257 -- .....  
258 -- ..... \*\*\*\*\* .....  
259 -- .....  
260 -- ..... \*\*\*\*\* .....  
261 -- .....  
262 -- ..... \*\* .....  
263 -- ..... \*\*\*\*\* .....  
264 -- .....  
265 -- ..... \*\*\*\*\* \* .....  
266 -- .....  
267 -- .....  
268 -- ..... \*\*\*\*\* .....  
269 -- .....  
270 -- ..... \*\*\*\*\* .....  
271 -- .....  
272 -- .....  
273 -- .....  
274 -- .....  
275 -- .....  
276 -- .....  
277 -- ..... \*\*\*\*\* .....  
278 -- ..... \*\*\*\*\* .....  
279 -- ..... \*\*\*\*\* .....  
280 -- ..... \*\*\*\*\* \* .....  
281 -- ..... \*\* \*\*\*\*\* .....  
282 -- .....  
283 -- .....  
284 -- .....  
285 -- ..... \*\*\*\*\* .....  
286 -- ..... \*\*\*\*\* .....  
287 -- .....  
288 -- ..... \*\* .....  
289 -- .....  
290 -- .....  
291 -- ..... \*\* .....  
292 -- .....  
293 -- .....  
294 -- ..... \*\*\* .....  
295 -- .....  
296 -- .....  
297 -- .....  
298 -- .....  
299 -- .....  
300 -- .....  
301 -- .....  
302 -- .....  
303 -- .....

```
304 -- .....
305 -- .....
306 -- .....
307 -- .....
308 -- ..... ** **
309 -- .....
310 -- ..... ***
311 -- ..... *****
312 -- .....
313 -- ..... ***** *
314 -- .....
315 -- ..... **
316 -- ..... *****
317 -- ..... *****
318 -- .....
319 -- ..... **
320 -- .....
321 -- ..... *****
322 -- .....
323 -- ..... ***
324 -- .....
325 -- ..... *** ** *
326 -- .....
327 -- .....
328 -- ..... *****
329 -- .....
330 -- .....
331 -- .....
332 -- ..... ***** **
333 -- ..... *** *
334 -- .....
335 -- .....
336 -- ..... **
337 -- .....
338 -- ..... ***
339 -- ..... ***** ** *
340 -- ..... *****
341 -- ..... **
342 -- .....
343 -- ..... * *
344 -- .....
345 -- .....
346 -- .....
347 -- .....
348 -- .....
349 -- ..... *****
350 -- ..... *****
351 -- ..... ** *
352 -- .....
353 -- .....
354 -- .....
355 -- .....
356 -- ..... ***
357 -- .....
358 -- ..... * *
359 -- .....
360 -- ..... * *
361 -- ..... * **
362 -- .....
363 -- .....
364 -- .....
365 -- .....
366 -- .....
367 -- .....
368 -- ..... **
369 -- ..... *
370 -- .....
371 -- .....
372 -- ..... ***** **
373 -- .....
374 -- .....
375 -- .....
376 -- .....
377 -- .....
378 -- .....
379 -- ..... *
380 -- ..... *****
381 -- .....
382 -- ..... ** *
383 -- ..... * **
384 -- .....
```

385 -- .....\*\*\*\*\*  
386 -- .....  
387 -- .....  
388 -- .....\*\*\*  
389 -- .....  
390 -- .....\*\*\*  
391 -- .....  
392 -- .....\*.\*  
393 -- .....\*\*\*\*\*  
394 -- .....\*\*\*\*\*  
395 -- .....\*\*.\*.....\*\*\*\*\*  
396 -- .....\*\*.....\*\*\*\*\*  
397 -- .....\*\*\*\*\*  
398 -- .....  
399 -- .....  
400 -- .....  
401 -- .....\*\*  
402 -- .....\*\*.\*  
403 -- .....\*\*.\*  
404 -- .....\*\*  
405 -- .....\*\*.\*  
406 -- .....\*\*\*\*\*  
407 -- .....\*\*.\*.....\*\*\*\*\*  
408 -- .....\*.\*  
409 -- .....\*\*  
410 -- .....\*\*  
411 -- .....\*\*.\*  
412 -- .....\*\*  
413 -- .....\*\*\*\*\*.\*  
414 -- .....\*\*.\*  
415 -- .....\*\*\*  
416 -- .....\*\*\*\*\*.....\*\*\*\*\*  
417 -- .....\*.\*  
418 -- .....\*\*\*\*\*.\*  
419 -- .....  
420 -- .....\*.\*  
421 -- .....\*\*\*\*\*  
422 -- .....  
423 -- .....\*.\*.....\*\*\*\*\*  
424 -- .....\*.\*  
425 -- .....\*\*\*\*\*  
426 -- .....\*.\*.....\*\*\*\*\*  
427 -- .....\*.\*  
428 -- .....\*\*\*\*\*.\*  
429 -- .....\*\*\*\*\*  
430 -- .....\*\*\*\*\*.....\*\*\*\*\*  
431 -- .....  
432 -- .....\*.\*  
433 -- .....\*\*\*\*\*  
434 -- .....\*\*.\*  
435 -- .....\*\*\*\*\*  
436 -- .....\*\*\*.\*  
437 -- .....\*\*.\*.....\*\*\*\*\*  
438 -- .....\*.\*.....\*\*\*\*\*  
439 -- .....\*.\*  
440 -- .....\*\*\*\*\*.\*  
441 -- .....\*\*\*\*\*.\*  
442 -- .....\*\*\*.\*  
443 -- .....  
444 -- .....  
445 -- .....\*\*\*\*\*  
446 -- .....  
447 -- .....\*\*.\*  
448 -- .....\*\*\*\*\*  
449 -- .....\*\*\*\*\*  
450 -- .....  
451 -- .....\*\*\*  
452 -- .....  
453 -- .....\*\*  
454 -- .....\*\*  
455 -- .....\*\*\*  
456 -- .....  
457 -- .....\*\*\*\*\*

ID -- Partition (continued)

1 -- .....  
2 -- .....  
3 -- .....  
4 -- .....

```
5 -- .....
6 -- .....
7 -- .....
8 -- .....
9 -- .....
10 -- .....
11 -- .....
12 -- .....
13 -- .....
14 -- .....
15 -- .....
16 -- .....
17 -- .....
18 -- .....
19 -- .....
20 -- .....
21 -- .....
22 -- .....
23 -- .....
24 -- .....
25 -- .....
26 -- .....
27 -- .....
28 -- .....
29 -- .....
30 -- .....
31 -- .....
32 -- .....
33 -- .....
34 -- .....
35 -- .....
36 -- .....
37 -- .....
38 -- .....
39 -- .....
40 -- .....
41 -- .....
42 -- .....
43 -- .....
44 -- .....
45 -- .....
46 -- .....
47 -- .....
48 -- .....
49 -- .....
50 -- .....
51 -- .....
52 -- .....
53 -- .....
54 -- .....
55 -- .....
56 -- .....
57 -- .....
58 -- .....
59 -- .....
60 -- .....
61 -- .....
62 -- .....
63 -- .....
64 -- .....
65 -- .....
66 -- .....
67 -- .....
68 -- .....
69 -- .....
70 -- .....
71 -- .....
72 -- * .....
73 -- . * .....
74 -- . * .....
75 -- . . * .....
76 -- . . . * .....
77 -- . . . . * .....
78 -- . . . . . * .....
79 -- . . . . . * .....
80 -- . . . . . * .....
81 -- . . . . . * .....
82 -- . . . . . * .....
83 -- . . . . . * .....
84 -- . . . . . * .....
85 -- . . . . . *
```

```
86 -- .....*.....
87 -- .....*.....
88 -- .....*.....
89 -- .....*.....
90 -- .....*.....
91 -- .....*.....
92 -- .....*.....
93 -- .....*.....
94 -- .....*.....
95 -- .....*.....
96 -- .....*.....
97 -- .....*.....
98 -- .....*.....
99 -- .....*.....
100 -- .....*.....
101 -- .....*.....
102 -- .....*.....
103 -- .....*.....
104 -- .....*.....
105 -- .....*.....
106 -- .....*.....
107 -- .....*.....
108 -- .....*.....
109 -- .....*.....
110 -- .....*.....
111 -- .....*.....
112 -- .....*.....
113 -- .....*.....
114 -- .....*.....
115 -- .....*.....
116 -- .....*.....
117 -- .....*.....
118 -- .....*.....
119 -- .....*.....
120 -- .....*.....
121 -- .....*.....
122 -- .....*.....
123 -- .....*.....
124 -- .....*.....
125 -- .....*.....
126 -- .....*.....
127 -- .....*.....
128 -- .....*.....
129 -- .....*.....
130 -- .....*.....
131 -- .....*.....
132 -- .....*.....
133 -- .....*.....
134 -- .....*.....
135 -- .....*.....
136 -- .....*.....
137 -- .....*.....
138 -- .....*.....
139 -- .....*.....
140 -- .....*.....
141 -- .....*.....
142 -- .....*.....
143 -- .....
144 -- .....
145 -- .....
146 -- .....
147 -- .....
148 -- .....
149 -- .....
150 -- .....
151 -- .....
152 -- .....
153 -- .....
154 -- .....
155 -- .....
156 -- .....
157 -- .....
158 -- .....**.....
159 -- .....*****
160 -- .....*****
161 -- .....
162 -- *****
163 -- .....
164 -- .....
165 -- .....
166 -- *****
```



```
167 -- .....
168 -- .....
169 -- *****
170 -- .....
171 -- .....
172 -- .....
173 -- .....
174 -- .....
175 -- .....
176 -- .....
177 -- .....
178 -- .....
179 -- *****
180 -- .....
181 -- .....
182 -- .....
183 -- .....
184 -- .....
185 -- .....
186 -- .....
187 -- .....
188 -- *****
189 -- .....
190 -- .....
191 -- .....
192 -- .....
193 -- .....
194 -- .....
195 -- .....
196 -- .....
197 -- .....
198 -- .....
199 -- .....
200 -- .....
201 -- .....
202 -- .....
203 -- .....
204 -- .....
205 -- .....
206 -- .....
207 -- .....
208 -- .....
209 -- .....
210 -- .....
211 -- .....
212 -- .....
213 -- .....
214 -- .....
215 -- .....
216 -- .....
217 -- .....
218 -- .....
219 -- .....
220 -- .....
221 -- .....
222 -- .....
223 -- .....
224 -- .....
225 -- .....
226 -- .....
227 -- .....
228 -- .....
229 -- .....
230 -- .....
231 -- .....
232 -- .....
233 -- .....
234 -- .....
235 -- .....
236 -- .....
237 -- .....
238 -- .....
239 -- .....
240 -- .....
241 -- .....
242 -- .....
243 -- .....
244 -- .....
245 -- .....
246 -- .....
247 -- .....
```

```
248 -- .....
249 -- .....
250 -- ..... ** .....
251 -- .....
252 -- ***** .....
253 -- ..... ** .....
254 -- ..... ** .....
255 -- ..... * * .....
256 -- ..... ** .....
257 -- ..... ***** .....
258 -- .....
259 -- ..... *** * .....
260 -- ***** .....
261 -- ..... ***** .....
262 -- .....
263 -- ***** .....
264 -- ..... ***** .....
265 -- .....
266 -- ..... *** .....
267 -- ..... *** .....
268 -- .....
269 -- ..... ** ..... ***** .....
270 -- ***** .....
271 -- ..... ** .....
272 -- ..... ***** ..... ***** .....
273 -- ..... ***** .....
274 -- ..... *** .....
275 -- ..... ***** * .....
276 -- ..... ** .....
277 -- .....
278 -- .....
279 -- .....
280 -- .....
281 -- ***** .....
282 -- ..... * * .....
283 -- ..... ** .....
284 -- ..... ***** .....
285 -- ***** .....
286 -- .....
287 -- ..... ***** .....
288 -- .....
289 -- ..... *** .....
290 -- ..... ***** .....
291 -- ***** .....
292 -- ..... * * * .....
293 -- ..... ***** .....
294 -- .....
295 -- ..... ** ..... ***** .....
296 -- .....
297 -- ..... ** .....
298 -- ..... ** * .....
299 -- ..... *** * .....
300 -- ..... ***** * .....
301 -- ..... ***** .....
302 -- ..... ***** .....
303 -- ..... * * * .....
304 -- ..... ** .....
305 -- ..... ** .....
306 -- .....
307 -- .....
308 -- .....
309 -- ..... ***** .....
310 -- .....
311 -- ***** .....
312 -- ..... *** .....
313 -- .....
314 -- ..... ***** .....
315 -- .....
316 -- ***** .....
317 -- ***** .....
318 -- ..... * ..... ***** .....
319 -- .....
320 -- ..... ** .....
321 -- .....
322 -- ..... ***** .....
323 -- .....
324 -- ..... ***** .....
325 -- .....
326 -- ..... ***** .....
327 -- ..... ***** ..... ** .....
328 -- .....
```

329 -- .....\*\*\*\*\*.....  
330 -- .....\*\*.....  
331 -- .....\*.\*.....  
332 -- .....  
333 -- .....  
334 -- .....\*\*\*.....  
335 -- \*.\*.....  
336 -- .....  
337 -- .....\*\*\*.....  
338 -- .....  
339 -- .....  
340 -- .....  
341 -- .....  
342 -- .....\*\*\*.\*.....  
343 -- .....  
344 -- .....\*\*.....  
345 -- .....\*\*.....  
346 -- .....\*\*.....  
347 -- .....\*.\*.....  
348 -- .....\*\*\*\*.\*.....  
349 -- .....  
350 -- \*\*\*\*\*.....  
351 -- .....  
352 -- .....\*.\*.....  
353 -- .....\*\*.....  
354 -- .....\*.\*.....  
355 -- .....\*.\*.....  
356 -- .....  
357 -- .....\*\*.....  
358 -- .....  
359 -- .....\*.\*.....  
360 -- .....  
361 -- .....  
362 -- .....\*\*.....  
363 -- .....\*\*.\*.....  
364 -- .....\*\*\*.....  
365 -- .....\*\*.....  
366 -- .....\*\*.....  
367 -- .....\*.\*.....  
368 -- .....  
369 -- \*\*\*\*\*.....  
370 -- .....\*\*\*\*\*.....  
371 -- .....\*\*\*.....  
372 -- .....  
373 -- .....\*.\*.....  
374 -- .....\*.\*.....  
375 -- .....\*\*\*\*\*.....  
376 -- .....\*\*.\*.\*.....  
377 -- .....\*\*.\*.....  
378 -- .....\*\*\*\*\*.....  
379 -- \*\*\*\*\*.....  
380 -- \*\*\*\*\*.....  
381 -- .....\*\*\*\*\*.....  
382 -- .....  
383 -- .....  
384 -- \*\*\*\*\*.....  
385 -- \*\*\*\*\*.....  
386 -- .....\*.\*.....  
387 -- .....\*\*\*.....  
388 -- .....  
389 -- .....\*\*\*\*\*.....  
390 -- .....  
391 -- .....\*\*.....  
392 -- .....  
393 -- .....  
394 -- \*\*\*\*\*.....  
395 -- \*\*\*\*\*.....  
396 -- \*\*\*\*\*.....  
397 -- .....  
398 -- .....\*\*\*\*\*.....  
399 -- .....\*\*\*\*\*.....\*\*.....  
400 -- .....\*\*.\*.....  
401 -- .....  
402 -- \*\*\*\*\*.....  
403 -- .....  
404 -- .....  
405 -- .....  
406 -- \*\*\*\*\*.....  
407 -- \*\*\*\*\*.....  
408 -- .....  
409 -- .....

410 -- .....  
411 -- .....  
412 -- .....  
413 -- .....  
414 -- .....  
415 -- .....  
416 -- \*\*\*\*\*  
417 -- .....  
418 -- .....  
419 -- ..... \*\*\*\*. ....  
420 -- .....  
421 -- .....  
422 -- ..... \*\*\*\*\* .....  
423 -- \*\*\*\*\*  
424 -- .....  
425 -- \*\*\*\*\*  
426 -- \*\*\*\*\*  
427 -- .....  
428 -- .....  
429 -- .....  
430 -- \*\*\*\*\*  
431 -- ..... \*\*. ....  
432 -- .....  
433 -- .....  
434 -- .....  
435 -- .....  
436 -- .....  
437 -- \*\*\*\*\*  
438 -- \*\*\*\*\*  
439 -- .....  
440 -- .....  
441 -- .....  
442 -- .....  
443 -- ..... \*\*\*. ....  
444 -- ..... \*\*. ....  
445 -- .....  
446 -- ..... \*. ....  
447 -- .....  
448 -- \*\*\*\*\*  
449 -- \*\*\*\*\*  
450 -- ..... \*\*\*. ....  
451 -- .....  
452 -- ..... \*\*. ....  
453 -- \*\*\*\*\*  
454 -- \*\*\*\*\*  
455 -- .....  
456 -- ..... \*. ....  
457 -- .....  
-----

ID -- Partition (continued)

-----  
1 -- \*\*\*\*\*  
2 -- .....  
3 -- .....  
4 -- .....  
5 -- .....  
6 -- .....  
7 -- .....  
8 -- .....  
9 -- .....  
10 -- .....  
11 -- .....  
12 -- .....  
13 -- .....  
14 -- .....  
15 -- .....  
16 -- .....  
17 -- .....  
18 -- .....  
19 -- .....  
20 -- .....  
21 -- .....  
22 -- .....  
23 -- .....  
24 -- .....  
25 -- .....  
26 -- .....  
27 -- .....  
28 -- .....  
29 -- .....

30 -- .....  
31 -- .....  
32 -- .....  
33 -- .....  
34 -- .....  
35 -- .....  
36 -- .....  
37 -- .....  
38 -- .....  
39 -- .....  
40 -- .....  
41 -- .....  
42 -- .....  
43 -- .....  
44 -- .....  
45 -- .....  
46 -- .....  
47 -- .....  
48 -- .....  
49 -- .....  
50 -- .....  
51 -- .....  
52 -- .....  
53 -- .....  
54 -- .....  
55 -- .....  
56 -- .....  
57 -- .....  
58 -- .....  
59 -- .....  
60 -- .....  
61 -- .....  
62 -- .....  
63 -- .....  
64 -- .....  
65 -- .....  
66 -- .....  
67 -- .....  
68 -- .....  
69 -- .....  
70 -- .....  
71 -- .....  
72 -- .....  
73 -- .....  
74 -- .....  
75 -- .....  
76 -- .....  
77 -- .....  
78 -- .....  
79 -- .....  
80 -- .....  
81 -- .....  
82 -- .....  
83 -- .....  
84 -- .....  
85 -- .....  
86 -- .....  
87 -- .....  
88 -- .....  
89 -- .....  
90 -- .....  
91 -- .....  
92 -- .....  
93 -- .....  
94 -- .....  
95 -- .....  
96 -- .....  
97 -- .....  
98 -- .....  
99 -- .....  
100 -- .....  
101 -- .....  
102 -- .....  
103 -- .....  
104 -- .....  
105 -- .....  
106 -- .....  
107 -- .....  
108 -- .....  
109 -- .....  
110 -- .....

111 -- .....  
112 -- .....  
113 -- .....  
114 -- .....  
115 -- .....  
116 -- .....  
117 -- .....  
118 -- .....  
119 -- .....  
120 -- .....  
121 -- .....  
122 -- .....  
123 -- .....  
124 -- .....  
125 -- .....  
126 -- .....  
127 -- .....  
128 -- .....  
129 -- .....  
130 -- .....  
131 -- .....  
132 -- .....  
133 -- .....  
134 -- .....  
135 -- .....  
136 -- .....  
137 -- .....  
138 -- .....  
139 -- .....  
140 -- .....  
141 -- .....  
142 -- .....  
143 -- \*.....  
144 -- .\*.....  
145 -- .\*. ....  
146 -- ...\*.....  
147 -- ....\*.....  
148 -- .....\*.....  
149 -- .....\*.....  
150 -- .....\*.....  
151 -- .....\*.....  
152 -- .....\*.....  
153 -- .....\*.....  
154 -- .....\*.....  
155 -- .....\*.....  
156 -- .....\*.....  
157 -- .....  
158 -- .....  
159 -- .....  
160 -- \*\*\*\*\*.....  
161 -- .....  
162 -- .....  
163 -- .....  
164 -- .....  
165 -- .....  
166 -- \*\*\*\*\*  
167 -- .....  
168 -- .....\*.....  
169 -- \*\*\*\*\*  
170 -- .....  
171 -- .....  
172 -- .....  
173 -- .....  
174 -- .....  
175 -- .....  
176 -- .....  
177 -- .....\*\*.....  
178 -- .....  
179 -- \*\*\*\*\*  
180 -- .....  
181 -- .....  
182 -- .....  
183 -- \*\*\*\*\*.....  
184 -- .....  
185 -- .....  
186 -- .....  
187 -- \*\*.....  
188 -- \*\*\*\*\*  
189 -- .....  
190 -- .....  
191 -- .....

192 -- .....  
193 -- .....  
194 -- \*\*\*\* .....  
195 -- .....  
196 -- \*\*\*\* .....  
197 -- .....  
198 -- .....  
199 -- .....  
200 -- .....  
201 -- .....  
202 -- .....  
203 -- \*\*\*\* .....  
204 -- .....  
205 -- \*\*\*\* .....  
206 -- .....  
207 -- .....  
208 -- .....  
209 -- .....  
210 -- .....  
211 -- .....  
212 -- .....  
213 -- \*\*\*\*\* .....  
214 -- .....  
215 -- .....  
216 -- .....  
217 -- .....  
218 -- \*\*\*\*\* . \* .  
219 -- ..... \* . \*\*  
220 -- .....  
221 -- .....  
222 -- .....  
223 -- .....  
224 -- .....  
225 -- .....  
226 -- .....  
227 -- .....  
228 -- .....  
229 -- .....  
230 -- \*\*\*\*\* . \*\*\*\*  
231 -- .....  
232 -- .....  
233 -- \*\*\*\*\*  
234 -- \*\*\*\*\* . \*\*\*\*  
235 -- .....  
236 -- .....  
237 -- .....  
238 -- .....  
239 -- .....  
240 -- .....  
241 -- .....  
242 -- .....  
243 -- .....  
244 -- .....  
245 -- .....  
246 -- .....  
247 -- .....  
248 -- .....  
249 -- .....  
250 -- .....  
251 -- .....  
252 -- .....  
253 -- .....  
254 -- .....  
255 -- .....  
256 -- .....  
257 -- .....  
258 -- .....  
259 -- .....  
260 -- \*\*\*\*\*  
261 -- .....  
262 -- .....  
263 -- .....  
264 -- ..... \*  
265 -- .....  
266 -- .....  
267 -- .....  
268 -- .....  
269 -- .....  
270 -- .....  
271 -- .....  
272 -- ..... \*

273 -- \*\*\*\*. . . . .  
274 -- . . . . .  
275 -- . . . . .  
276 -- . . . . .  
277 -- . . . . .\* . . .  
278 -- . . . . .  
279 -- . . . . .  
280 -- . . . . .  
281 -- \*\*\*\*\*  
282 -- . . . . .  
283 -- . . . . .  
284 -- . . . . .\* . . .  
285 -- \*\*\*\*\*. \*\*\*\*\*  
286 -- . . . . .  
287 -- . . . . .\* . \* .  
288 -- . . . . .  
289 -- . . . . .  
290 -- . . . . .  
291 -- . . . . .  
292 -- . . . . .  
293 -- . . . . .\* . . .  
294 -- . . . . .  
295 -- . . . . .  
296 -- \*\* . \* . . . . .  
297 -- . . . . .  
298 -- . . . . .  
299 -- . . . . .  
300 -- . . . . .  
301 -- . . . . .  
302 -- . . . . .  
303 -- . . . . .  
304 -- . . . . .  
305 -- . . . . .  
306 -- . . \* . . . . .  
307 -- \*\*\*. . . . .  
308 -- . . . . .  
309 -- . . . . .\*  
310 -- . . . . .  
311 -- \*\*\*\*\*  
312 -- . . . . .  
313 -- . . . . .  
314 -- . . . . .  
315 -- . . . . .  
316 -- \*\*\*\*\*  
317 -- \*\*\*\*\*  
318 -- \*\*\*\*. . . . .  
319 -- . . . . .  
320 -- . . . . .  
321 -- . . . . .  
322 -- . . . . .  
323 -- . . . . .  
324 -- . . . . .\* . \* .  
325 -- . . . . .  
326 -- . . . . .  
327 -- . . . . .  
328 -- . . . . .  
329 -- . . . . .  
330 -- . . . . .  
331 -- . . . . .  
332 -- . . . . .\* . . .  
333 -- . . . . .  
334 -- . . . . .  
335 -- . . . . .  
336 -- . . . . .  
337 -- . . . . .  
338 -- . . . . .  
339 -- . . . . .  
340 -- . . . . .\* . . .  
341 -- . . . . .  
342 -- . . . . .  
343 -- . . . . .  
344 -- . . . . .  
345 -- . . . . .  
346 -- . . . . .  
347 -- . . . . .  
348 -- . . . . .  
349 -- . . . . .  
350 -- . . . . .  
351 -- . . . . .  
352 -- . . . . .  
353 -- . . . . .



354 -- .....  
355 -- .....  
356 -- .....  
357 -- .....  
358 -- .....  
359 -- .....  
360 -- .....  
361 -- .....  
362 -- .....  
363 -- .....  
364 -- .....  
365 -- .....  
366 -- .....  
367 -- .....  
368 -- .....  
369 -- .....  
370 -- .....  
371 -- .....  
372 -- .....  
373 -- .....  
374 -- .....  
375 -- .....  
376 -- .....  
377 -- .....  
378 -- .....\* \*\*  
379 -- .....  
380 -- \*\*\*\*\*  
381 -- .....\*...  
382 -- .....  
383 -- .....  
384 -- .....  
385 -- \*\*\*\*\*  
386 -- .....  
387 -- .....  
388 -- .....  
389 -- .....  
390 -- .....  
391 -- .....  
392 -- .....  
393 -- .....  
394 -- \*\*\*\*\*  
395 -- \*\*\*\*\*  
396 -- \*\*\*\*\*  
397 -- .....  
398 -- .....\*...\*  
399 -- .....  
400 -- .....  
401 -- .....  
402 -- .....  
403 -- .....  
404 -- .....  
405 -- .....  
406 -- \*\*\*\*\*  
407 -- \*\*\*\*\*  
408 -- .....  
409 -- .....  
410 -- .....  
411 -- .....  
412 -- .....  
413 -- .....  
414 -- .....  
415 -- .....  
416 -- \*\*\*\*\*  
417 -- .....  
418 -- .....  
419 -- .....  
420 -- .....  
421 -- .....  
422 -- .....\* \*\*  
423 -- \*\*\*\*\*  
424 -- .....  
425 -- \*\*\*\*\*  
426 -- \*\*\*\*\*  
427 -- .....  
428 -- .....\*...  
429 -- .....  
430 -- \*\*\*\*\*  
431 -- .....  
432 -- .....  
433 -- .....  
434 -- .....

```

435 -- .....
436 -- .....
437 -- *****
438 -- *****
439 -- .....
440 -- .....
441 -- .....
442 -- .....
443 -- .....
444 -- .....
445 -- .....
446 -- .....
447 -- .....
448 -- *****
449 -- *****
450 -- .....
451 -- .....
452 -- .....
453 -- .....
454 -- .....
455 -- .....
456 -- .....
457 -- .....

```

-----

Summary statistics for informative taxon bipartitions  
(saved to file "/infile\_converted.phy.tstat"):

| ID    | #obs | Probab.  | Sd(s)+   | Min(s)   | Max(s)   | Nruns |
|-------|------|----------|----------|----------|----------|-------|
| ----- |      |          |          |          |          |       |
| 157   | 3002 | 1.000000 | 0.000000 | 1.000000 | 1.000000 | 2     |
| 158   | 3002 | 1.000000 | 0.000000 | 1.000000 | 1.000000 | 2     |
| 159   | 3002 | 1.000000 | 0.000000 | 1.000000 | 1.000000 | 2     |
| 160   | 3002 | 1.000000 | 0.000000 | 1.000000 | 1.000000 | 2     |
| 161   | 3002 | 1.000000 | 0.000000 | 1.000000 | 1.000000 | 2     |
| 162   | 3002 | 1.000000 | 0.000000 | 1.000000 | 1.000000 | 2     |
| 163   | 3002 | 1.000000 | 0.000000 | 1.000000 | 1.000000 | 2     |
| 164   | 3002 | 1.000000 | 0.000000 | 1.000000 | 1.000000 | 2     |
| 165   | 3002 | 1.000000 | 0.000000 | 1.000000 | 1.000000 | 2     |
| 166   | 3002 | 1.000000 | 0.000000 | 1.000000 | 1.000000 | 2     |
| 167   | 3002 | 1.000000 | 0.000000 | 1.000000 | 1.000000 | 2     |
| 168   | 3002 | 1.000000 | 0.000000 | 1.000000 | 1.000000 | 2     |
| 169   | 3002 | 1.000000 | 0.000000 | 1.000000 | 1.000000 | 2     |
| 170   | 3002 | 1.000000 | 0.000000 | 1.000000 | 1.000000 | 2     |
| 171   | 3002 | 1.000000 | 0.000000 | 1.000000 | 1.000000 | 2     |
| 172   | 3002 | 1.000000 | 0.000000 | 1.000000 | 1.000000 | 2     |
| 173   | 3002 | 1.000000 | 0.000000 | 1.000000 | 1.000000 | 2     |
| 174   | 3002 | 1.000000 | 0.000000 | 1.000000 | 1.000000 | 2     |
| 175   | 3002 | 1.000000 | 0.000000 | 1.000000 | 1.000000 | 2     |
| 176   | 3002 | 1.000000 | 0.000000 | 1.000000 | 1.000000 | 2     |
| 177   | 3002 | 1.000000 | 0.000000 | 1.000000 | 1.000000 | 2     |
| 178   | 3002 | 1.000000 | 0.000000 | 1.000000 | 1.000000 | 2     |
| 179   | 3002 | 1.000000 | 0.000000 | 1.000000 | 1.000000 | 2     |
| 180   | 3002 | 1.000000 | 0.000000 | 1.000000 | 1.000000 | 2     |
| 181   | 3002 | 1.000000 | 0.000000 | 1.000000 | 1.000000 | 2     |
| 182   | 3002 | 1.000000 | 0.000000 | 1.000000 | 1.000000 | 2     |
| 183   | 3002 | 1.000000 | 0.000000 | 1.000000 | 1.000000 | 2     |
| 184   | 3002 | 1.000000 | 0.000000 | 1.000000 | 1.000000 | 2     |
| 185   | 3002 | 1.000000 | 0.000000 | 1.000000 | 1.000000 | 2     |
| 186   | 3002 | 1.000000 | 0.000000 | 1.000000 | 1.000000 | 2     |
| 187   | 3002 | 1.000000 | 0.000000 | 1.000000 | 1.000000 | 2     |
| 188   | 3002 | 1.000000 | 0.000000 | 1.000000 | 1.000000 | 2     |
| 189   | 3002 | 1.000000 | 0.000000 | 1.000000 | 1.000000 | 2     |
| 190   | 3002 | 1.000000 | 0.000000 | 1.000000 | 1.000000 | 2     |
| 191   | 3002 | 1.000000 | 0.000000 | 1.000000 | 1.000000 | 2     |
| 192   | 3002 | 1.000000 | 0.000000 | 1.000000 | 1.000000 | 2     |
| 193   | 3002 | 1.000000 | 0.000000 | 1.000000 | 1.000000 | 2     |
| 194   | 3002 | 1.000000 | 0.000000 | 1.000000 | 1.000000 | 2     |
| 195   | 3002 | 1.000000 | 0.000000 | 1.000000 | 1.000000 | 2     |
| 196   | 3002 | 1.000000 | 0.000000 | 1.000000 | 1.000000 | 2     |
| 197   | 3002 | 1.000000 | 0.000000 | 1.000000 | 1.000000 | 2     |
| 198   | 3002 | 1.000000 | 0.000000 | 1.000000 | 1.000000 | 2     |
| 199   | 3002 | 1.000000 | 0.000000 | 1.000000 | 1.000000 | 2     |
| 200   | 3002 | 1.000000 | 0.000000 | 1.000000 | 1.000000 | 2     |
| 201   | 3002 | 1.000000 | 0.000000 | 1.000000 | 1.000000 | 2     |
| 202   | 3002 | 1.000000 | 0.000000 | 1.000000 | 1.000000 | 2     |
| 203   | 3002 | 1.000000 | 0.000000 | 1.000000 | 1.000000 | 2     |
| 204   | 3002 | 1.000000 | 0.000000 | 1.000000 | 1.000000 | 2     |
| 205   | 3001 | 0.999667 | 0.000471 | 0.999334 | 1.000000 | 2     |
| 206   | 3001 | 0.999667 | 0.000471 | 0.999334 | 1.000000 | 2     |
| 207   | 3001 | 0.999667 | 0.000471 | 0.999334 | 1.000000 | 2     |

|     |      |          |          |          |          |   |
|-----|------|----------|----------|----------|----------|---|
| 208 | 3000 | 0.999334 | 0.000942 | 0.998668 | 1.000000 | 2 |
| 209 | 2999 | 0.999001 | 0.001413 | 0.998001 | 1.000000 | 2 |
| 210 | 2999 | 0.999001 | 0.000471 | 0.998668 | 0.999334 | 2 |
| 211 | 2998 | 0.998668 | 0.001884 | 0.997335 | 1.000000 | 2 |
| 212 | 2996 | 0.998001 | 0.001884 | 0.996669 | 0.999334 | 2 |
| 213 | 2996 | 0.998001 | 0.000942 | 0.997335 | 0.998668 | 2 |
| 214 | 2995 | 0.997668 | 0.002355 | 0.996003 | 0.999334 | 2 |
| 215 | 2994 | 0.997335 | 0.001884 | 0.996003 | 0.998668 | 2 |
| 216 | 2987 | 0.995003 | 0.007066 | 0.990007 | 1.000000 | 2 |
| 217 | 2986 | 0.994670 | 0.007537 | 0.989340 | 1.000000 | 2 |
| 218 | 2986 | 0.994670 | 0.002827 | 0.992672 | 0.996669 | 2 |
| 219 | 2979 | 0.992338 | 0.002355 | 0.990673 | 0.994004 | 2 |
| 220 | 2978 | 0.992005 | 0.010364 | 0.984677 | 0.999334 | 2 |
| 221 | 2977 | 0.991672 | 0.007066 | 0.986676 | 0.996669 | 2 |
| 222 | 2973 | 0.990340 | 0.001413 | 0.989340 | 0.991339 | 2 |
| 223 | 2972 | 0.990007 | 0.001884 | 0.988674 | 0.991339 | 2 |
| 224 | 2971 | 0.989674 | 0.005182 | 0.986009 | 0.993338 | 2 |
| 225 | 2969 | 0.989007 | 0.003298 | 0.986676 | 0.991339 | 2 |
| 226 | 2966 | 0.988008 | 0.005653 | 0.984011 | 0.992005 | 2 |
| 227 | 2963 | 0.987009 | 0.007066 | 0.982012 | 0.992005 | 2 |
| 228 | 2960 | 0.986009 | 0.013191 | 0.976682 | 0.995336 | 2 |
| 229 | 2957 | 0.985010 | 0.002355 | 0.983344 | 0.986676 | 2 |
| 230 | 2954 | 0.984011 | 0.004711 | 0.980680 | 0.987342 | 2 |
| 231 | 2942 | 0.980013 | 0.008480 | 0.974017 | 0.986009 | 2 |
| 232 | 2907 | 0.968354 | 0.024026 | 0.951366 | 0.985343 | 2 |
| 233 | 2900 | 0.966023 | 0.022612 | 0.950033 | 0.982012 | 2 |
| 234 | 2895 | 0.964357 | 0.007066 | 0.959360 | 0.969354 | 2 |
| 235 | 2892 | 0.963358 | 0.000000 | 0.963358 | 0.963358 | 2 |
| 236 | 2886 | 0.961359 | 0.009422 | 0.954697 | 0.968021 | 2 |
| 237 | 2883 | 0.960360 | 0.020257 | 0.946036 | 0.974684 | 2 |
| 238 | 2854 | 0.950700 | 0.003769 | 0.948035 | 0.953364 | 2 |
| 239 | 2824 | 0.940706 | 0.016959 | 0.928714 | 0.952698 | 2 |
| 240 | 2804 | 0.934044 | 0.033919 | 0.910060 | 0.958028 | 2 |
| 241 | 2798 | 0.932045 | 0.000000 | 0.932045 | 0.932045 | 2 |
| 242 | 2744 | 0.914057 | 0.014133 | 0.904064 | 0.924051 | 2 |
| 243 | 2667 | 0.888408 | 0.006124 | 0.884077 | 0.892738 | 2 |
| 244 | 2646 | 0.881412 | 0.013191 | 0.872085 | 0.890740 | 2 |
| 245 | 2645 | 0.881079 | 0.005182 | 0.877415 | 0.884744 | 2 |
| 246 | 2632 | 0.876749 | 0.065010 | 0.830779 | 0.922718 | 2 |
| 247 | 2613 | 0.870420 | 0.034390 | 0.846103 | 0.894737 | 2 |
| 248 | 2584 | 0.860759 | 0.025439 | 0.842771 | 0.878748 | 2 |
| 249 | 2565 | 0.854430 | 0.011777 | 0.846103 | 0.862758 | 2 |
| 250 | 2545 | 0.847768 | 0.047580 | 0.814124 | 0.881412 | 2 |
| 251 | 2464 | 0.820786 | 0.014133 | 0.810793 | 0.830779 | 2 |
| 252 | 2428 | 0.808794 | 0.051820 | 0.772152 | 0.845436 | 2 |
| 253 | 2408 | 0.802132 | 0.038629 | 0.774817 | 0.829447 | 2 |
| 254 | 2360 | 0.786143 | 0.026381 | 0.767488 | 0.804797 | 2 |
| 255 | 2316 | 0.771486 | 0.006595 | 0.766822 | 0.776149 | 2 |
| 256 | 2227 | 0.741839 | 0.008009 | 0.736176 | 0.747502 | 2 |
| 257 | 2177 | 0.725183 | 0.008951 | 0.718854 | 0.731512 | 2 |
| 258 | 2161 | 0.719853 | 0.021199 | 0.704863 | 0.734843 | 2 |
| 259 | 2100 | 0.699534 | 0.079143 | 0.643571 | 0.755496 | 2 |
| 260 | 1998 | 0.665556 | 0.035803 | 0.640240 | 0.690873 | 2 |
| 261 | 1907 | 0.635243 | 0.001413 | 0.634244 | 0.636243 | 2 |
| 262 | 1903 | 0.633911 | 0.015546 | 0.622918 | 0.644903 | 2 |
| 263 | 1879 | 0.625916 | 0.017430 | 0.613591 | 0.638241 | 2 |
| 264 | 1865 | 0.621252 | 0.020257 | 0.606929 | 0.635576 | 2 |
| 265 | 1850 | 0.616256 | 0.072548 | 0.564957 | 0.667555 | 2 |
| 266 | 1797 | 0.598601 | 0.020257 | 0.584277 | 0.612925 | 2 |
| 267 | 1779 | 0.592605 | 0.024968 | 0.574950 | 0.610260 | 2 |
| 268 | 1775 | 0.591272 | 0.016488 | 0.579614 | 0.602931 | 2 |
| 269 | 1714 | 0.570953 | 0.050878 | 0.534977 | 0.606929 | 2 |
| 270 | 1566 | 0.521652 | 0.032976 | 0.498334 | 0.544970 | 2 |
| 271 | 1547 | 0.515323 | 0.047580 | 0.481679 | 0.548967 | 2 |
| 272 | 1538 | 0.512325 | 0.042398 | 0.482345 | 0.542305 | 2 |
| 273 | 1531 | 0.509993 | 0.014604 | 0.499667 | 0.520320 | 2 |
| 274 | 1521 | 0.506662 | 0.073961 | 0.454364 | 0.558961 | 2 |
| 275 | 1495 | 0.498001 | 0.052291 | 0.461026 | 0.534977 | 2 |
| 276 | 1489 | 0.496003 | 0.003298 | 0.493671 | 0.498334 | 2 |
| 277 | 1459 | 0.486009 | 0.004240 | 0.483011 | 0.489007 | 2 |
| 278 | 1446 | 0.481679 | 0.035803 | 0.456362 | 0.506995 | 2 |
| 279 | 1442 | 0.480346 | 0.050878 | 0.444370 | 0.516322 | 2 |
| 280 | 1434 | 0.477682 | 0.031092 | 0.455696 | 0.499667 | 2 |
| 281 | 1432 | 0.477015 | 0.032976 | 0.453698 | 0.500333 | 2 |
| 282 | 1416 | 0.471686 | 0.068779 | 0.423051 | 0.520320 | 2 |
| 283 | 1408 | 0.469021 | 0.043340 | 0.438374 | 0.499667 | 2 |
| 284 | 1402 | 0.467022 | 0.019786 | 0.453031 | 0.481013 | 2 |
| 285 | 1401 | 0.466689 | 0.017430 | 0.454364 | 0.479014 | 2 |
| 286 | 1382 | 0.460360 | 0.016959 | 0.448368 | 0.472352 | 2 |
| 287 | 1297 | 0.432045 | 0.029679 | 0.411059 | 0.453031 | 2 |
| 288 | 1266 | 0.421719 | 0.016959 | 0.409727 | 0.433711 | 2 |

|     |      |          |          |          |          |   |
|-----|------|----------|----------|----------|----------|---|
| 289 | 1232 | 0.410393 | 0.004711 | 0.407062 | 0.413724 | 2 |
| 290 | 1149 | 0.382745 | 0.055118 | 0.343771 | 0.421719 | 2 |
| 291 | 1147 | 0.382079 | 0.011777 | 0.373751 | 0.390406 | 2 |
| 292 | 1144 | 0.381079 | 0.042398 | 0.351099 | 0.411059 | 2 |
| 293 | 1127 | 0.375416 | 0.048522 | 0.341106 | 0.409727 | 2 |
| 294 | 1070 | 0.356429 | 0.033919 | 0.332445 | 0.380413 | 2 |
| 295 | 1046 | 0.348434 | 0.049936 | 0.313125 | 0.383744 | 2 |
| 296 | 1032 | 0.343771 | 0.012248 | 0.335110 | 0.352432 | 2 |
| 297 | 1031 | 0.343438 | 0.014604 | 0.333111 | 0.353764 | 2 |
| 298 | 1030 | 0.343105 | 0.008480 | 0.337109 | 0.349101 | 2 |
| 299 | 1025 | 0.341439 | 0.013662 | 0.331779 | 0.351099 | 2 |
| 300 | 1013 | 0.337442 | 0.011777 | 0.329114 | 0.345769 | 2 |
| 301 | 1009 | 0.336109 | 0.026852 | 0.317122 | 0.355097 | 2 |
| 302 | 997  | 0.332112 | 0.011777 | 0.323784 | 0.340440 | 2 |
| 303 | 996  | 0.331779 | 0.007537 | 0.326449 | 0.337109 | 2 |
| 304 | 993  | 0.330779 | 0.034390 | 0.306462 | 0.355097 | 2 |
| 305 | 992  | 0.330446 | 0.000000 | 0.330446 | 0.330446 | 2 |
| 306 | 989  | 0.329447 | 0.014604 | 0.319121 | 0.339773 | 2 |
| 307 | 981  | 0.326782 | 0.002355 | 0.325117 | 0.328448 | 2 |
| 308 | 970  | 0.323118 | 0.017901 | 0.310460 | 0.335776 | 2 |
| 309 | 954  | 0.317788 | 0.017901 | 0.305130 | 0.330446 | 2 |
| 310 | 949  | 0.316123 | 0.008009 | 0.310460 | 0.321785 | 2 |
| 311 | 940  | 0.313125 | 0.020728 | 0.298468 | 0.327781 | 2 |
| 312 | 933  | 0.310793 | 0.007066 | 0.305796 | 0.315789 | 2 |
| 313 | 883  | 0.294137 | 0.007066 | 0.289141 | 0.299134 | 2 |
| 314 | 866  | 0.288474 | 0.038629 | 0.261159 | 0.315789 | 2 |
| 315 | 856  | 0.285143 | 0.005653 | 0.281146 | 0.289141 | 2 |
| 316 | 807  | 0.268821 | 0.038158 | 0.241839 | 0.295803 | 2 |
| 317 | 799  | 0.266156 | 0.042869 | 0.235843 | 0.296469 | 2 |
| 318 | 788  | 0.262492 | 0.002827 | 0.260493 | 0.264490 | 2 |
| 319 | 788  | 0.262492 | 0.009422 | 0.255829 | 0.269154 | 2 |
| 320 | 759  | 0.252831 | 0.005182 | 0.249167 | 0.256496 | 2 |
| 321 | 742  | 0.247169 | 0.014133 | 0.237175 | 0.257162 | 2 |
| 322 | 733  | 0.244171 | 0.059828 | 0.201865 | 0.286476 | 2 |
| 323 | 717  | 0.238841 | 0.009893 | 0.231845 | 0.245836 | 2 |
| 324 | 712  | 0.237175 | 0.016017 | 0.225849 | 0.248501 | 2 |
| 325 | 711  | 0.236842 | 0.014604 | 0.226516 | 0.247169 | 2 |
| 326 | 705  | 0.234843 | 0.057944 | 0.193871 | 0.275816 | 2 |
| 327 | 702  | 0.233844 | 0.004711 | 0.230513 | 0.237175 | 2 |
| 328 | 698  | 0.232512 | 0.017901 | 0.219853 | 0.245170 | 2 |
| 329 | 693  | 0.230846 | 0.008009 | 0.225183 | 0.236509 | 2 |
| 330 | 683  | 0.227515 | 0.017430 | 0.215190 | 0.239840 | 2 |
| 331 | 659  | 0.219520 | 0.010835 | 0.211859 | 0.227182 | 2 |
| 332 | 651  | 0.216855 | 0.024968 | 0.199201 | 0.234510 | 2 |
| 333 | 651  | 0.216855 | 0.029679 | 0.195869 | 0.237841 | 2 |
| 334 | 651  | 0.216855 | 0.026852 | 0.197868 | 0.235843 | 2 |
| 335 | 643  | 0.214191 | 0.008009 | 0.208528 | 0.219853 | 2 |
| 336 | 633  | 0.210859 | 0.010835 | 0.203198 | 0.218521 | 2 |
| 337 | 632  | 0.210526 | 0.013191 | 0.201199 | 0.219853 | 2 |
| 338 | 630  | 0.209860 | 0.013191 | 0.200533 | 0.219187 | 2 |
| 339 | 630  | 0.209860 | 0.027323 | 0.190540 | 0.229181 | 2 |
| 340 | 628  | 0.209194 | 0.003769 | 0.206529 | 0.211859 | 2 |
| 341 | 625  | 0.208195 | 0.002355 | 0.206529 | 0.209860 | 2 |
| 342 | 622  | 0.207195 | 0.000942 | 0.206529 | 0.207861 | 2 |
| 343 | 621  | 0.206862 | 0.008009 | 0.201199 | 0.212525 | 2 |
| 344 | 620  | 0.206529 | 0.009422 | 0.199867 | 0.213191 | 2 |
| 345 | 619  | 0.206196 | 0.003298 | 0.203864 | 0.208528 | 2 |
| 346 | 618  | 0.205863 | 0.021670 | 0.190540 | 0.221186 | 2 |
| 347 | 617  | 0.205530 | 0.007066 | 0.200533 | 0.210526 | 2 |
| 348 | 617  | 0.205530 | 0.039101 | 0.177881 | 0.233178 | 2 |
| 349 | 602  | 0.200533 | 0.002827 | 0.198534 | 0.202532 | 2 |
| 350 | 601  | 0.200200 | 0.042869 | 0.169887 | 0.230513 | 2 |
| 351 | 597  | 0.198867 | 0.005182 | 0.195203 | 0.202532 | 2 |
| 352 | 597  | 0.198867 | 0.009893 | 0.191872 | 0.205863 | 2 |
| 353 | 595  | 0.198201 | 0.004240 | 0.195203 | 0.201199 | 2 |
| 354 | 594  | 0.197868 | 0.010364 | 0.190540 | 0.205197 | 2 |
| 355 | 592  | 0.197202 | 0.000000 | 0.197202 | 0.197202 | 2 |
| 356 | 592  | 0.197202 | 0.010364 | 0.189873 | 0.204530 | 2 |
| 357 | 589  | 0.196203 | 0.010835 | 0.188541 | 0.203864 | 2 |
| 358 | 586  | 0.195203 | 0.014133 | 0.185210 | 0.205197 | 2 |
| 359 | 583  | 0.194204 | 0.003298 | 0.191872 | 0.196536 | 2 |
| 360 | 582  | 0.193871 | 0.006595 | 0.189207 | 0.198534 | 2 |
| 361 | 579  | 0.192871 | 0.004240 | 0.189873 | 0.195869 | 2 |
| 362 | 579  | 0.192871 | 0.006124 | 0.188541 | 0.197202 | 2 |
| 363 | 579  | 0.192871 | 0.000471 | 0.192538 | 0.193205 | 2 |
| 364 | 576  | 0.191872 | 0.009422 | 0.185210 | 0.198534 | 2 |
| 365 | 564  | 0.187875 | 0.005653 | 0.183877 | 0.191872 | 2 |
| 366 | 564  | 0.187875 | 0.004711 | 0.184544 | 0.191206 | 2 |
| 367 | 561  | 0.186875 | 0.004240 | 0.183877 | 0.189873 | 2 |
| 368 | 559  | 0.186209 | 0.010835 | 0.178548 | 0.193871 | 2 |
| 369 | 559  | 0.186209 | 0.006124 | 0.181879 | 0.190540 | 2 |

|     |     |          |          |          |          |   |
|-----|-----|----------|----------|----------|----------|---|
| 370 | 558 | 0.185876 | 0.011306 | 0.177881 | 0.193871 | 2 |
| 371 | 555 | 0.184877 | 0.006124 | 0.180546 | 0.189207 | 2 |
| 372 | 546 | 0.181879 | 0.033919 | 0.157895 | 0.205863 | 2 |
| 373 | 545 | 0.181546 | 0.014604 | 0.171219 | 0.191872 | 2 |
| 374 | 543 | 0.180879 | 0.006124 | 0.176549 | 0.185210 | 2 |
| 375 | 541 | 0.180213 | 0.002355 | 0.178548 | 0.181879 | 2 |
| 376 | 537 | 0.178881 | 0.005182 | 0.175217 | 0.182545 | 2 |
| 377 | 534 | 0.177881 | 0.008480 | 0.171885 | 0.183877 | 2 |
| 378 | 531 | 0.176882 | 0.011777 | 0.168554 | 0.185210 | 2 |
| 379 | 530 | 0.176549 | 0.024497 | 0.159227 | 0.193871 | 2 |
| 380 | 527 | 0.175550 | 0.008951 | 0.169221 | 0.181879 | 2 |
| 381 | 525 | 0.174883 | 0.026852 | 0.155896 | 0.193871 | 2 |
| 382 | 525 | 0.174883 | 0.041927 | 0.145237 | 0.204530 | 2 |
| 383 | 524 | 0.174550 | 0.007537 | 0.169221 | 0.179880 | 2 |
| 384 | 522 | 0.173884 | 0.014133 | 0.163891 | 0.183877 | 2 |
| 385 | 521 | 0.173551 | 0.040043 | 0.145237 | 0.201865 | 2 |
| 386 | 509 | 0.169554 | 0.023083 | 0.153231 | 0.185876 | 2 |
| 387 | 507 | 0.168887 | 0.000471 | 0.168554 | 0.169221 | 2 |
| 388 | 493 | 0.164224 | 0.019315 | 0.150566 | 0.177881 | 2 |
| 389 | 491 | 0.163558 | 0.008951 | 0.157229 | 0.169887 | 2 |
| 390 | 490 | 0.163225 | 0.016017 | 0.151899 | 0.174550 | 2 |
| 391 | 486 | 0.161892 | 0.006595 | 0.157229 | 0.166556 | 2 |
| 392 | 478 | 0.159227 | 0.003769 | 0.156562 | 0.161892 | 2 |
| 393 | 474 | 0.157895 | 0.002827 | 0.155896 | 0.159893 | 2 |
| 394 | 469 | 0.156229 | 0.000471 | 0.155896 | 0.156562 | 2 |
| 395 | 463 | 0.154231 | 0.030621 | 0.132578 | 0.175883 | 2 |
| 396 | 463 | 0.154231 | 0.001413 | 0.153231 | 0.155230 | 2 |
| 397 | 459 | 0.152898 | 0.024968 | 0.135243 | 0.170553 | 2 |
| 398 | 459 | 0.152898 | 0.024968 | 0.135243 | 0.170553 | 2 |
| 399 | 457 | 0.152232 | 0.011777 | 0.143904 | 0.160560 | 2 |
| 400 | 453 | 0.150899 | 0.034390 | 0.126582 | 0.175217 | 2 |
| 401 | 444 | 0.147901 | 0.003769 | 0.145237 | 0.150566 | 2 |
| 402 | 439 | 0.146236 | 0.034390 | 0.121919 | 0.170553 | 2 |
| 403 | 432 | 0.143904 | 0.011306 | 0.135909 | 0.151899 | 2 |
| 404 | 432 | 0.143904 | 0.002827 | 0.141905 | 0.145903 | 2 |
| 405 | 432 | 0.143904 | 0.016017 | 0.132578 | 0.155230 | 2 |
| 406 | 430 | 0.143238 | 0.002827 | 0.141239 | 0.145237 | 2 |
| 407 | 428 | 0.142572 | 0.001884 | 0.141239 | 0.143904 | 2 |
| 408 | 424 | 0.141239 | 0.016017 | 0.129913 | 0.152565 | 2 |
| 409 | 422 | 0.140573 | 0.002827 | 0.138574 | 0.142572 | 2 |
| 410 | 422 | 0.140573 | 0.001884 | 0.139241 | 0.141905 | 2 |
| 411 | 421 | 0.140240 | 0.008951 | 0.133911 | 0.146569 | 2 |
| 412 | 415 | 0.138241 | 0.010835 | 0.130580 | 0.145903 | 2 |
| 413 | 414 | 0.137908 | 0.059357 | 0.095936 | 0.179880 | 2 |
| 414 | 411 | 0.136909 | 0.001413 | 0.135909 | 0.137908 | 2 |
| 415 | 400 | 0.133245 | 0.015075 | 0.122585 | 0.143904 | 2 |
| 416 | 396 | 0.131912 | 0.003769 | 0.129247 | 0.134577 | 2 |
| 417 | 392 | 0.130580 | 0.016017 | 0.119254 | 0.141905 | 2 |
| 418 | 390 | 0.129913 | 0.020728 | 0.115256 | 0.144570 | 2 |
| 419 | 388 | 0.129247 | 0.023555 | 0.112592 | 0.145903 | 2 |
| 420 | 387 | 0.128914 | 0.001413 | 0.127915 | 0.129913 | 2 |
| 421 | 386 | 0.128581 | 0.017901 | 0.115923 | 0.141239 | 2 |
| 422 | 385 | 0.128248 | 0.040043 | 0.099933 | 0.156562 | 2 |
| 423 | 385 | 0.128248 | 0.005182 | 0.124584 | 0.131912 | 2 |
| 424 | 380 | 0.126582 | 0.014133 | 0.116589 | 0.136576 | 2 |
| 425 | 374 | 0.124584 | 0.005653 | 0.120586 | 0.128581 | 2 |
| 426 | 371 | 0.123584 | 0.022141 | 0.107928 | 0.139241 | 2 |
| 427 | 370 | 0.123251 | 0.006595 | 0.118588 | 0.127915 | 2 |
| 428 | 366 | 0.121919 | 0.011306 | 0.113924 | 0.129913 | 2 |
| 429 | 363 | 0.120919 | 0.005182 | 0.117255 | 0.124584 | 2 |
| 430 | 360 | 0.119920 | 0.034861 | 0.095270 | 0.144570 | 2 |
| 431 | 357 | 0.118921 | 0.013662 | 0.109260 | 0.128581 | 2 |
| 432 | 356 | 0.118588 | 0.033919 | 0.094604 | 0.142572 | 2 |
| 433 | 354 | 0.117921 | 0.018844 | 0.104597 | 0.131246 | 2 |
| 434 | 353 | 0.117588 | 0.000471 | 0.117255 | 0.117921 | 2 |
| 435 | 349 | 0.116256 | 0.010835 | 0.108594 | 0.123917 | 2 |
| 436 | 345 | 0.114923 | 0.008009 | 0.109260 | 0.120586 | 2 |
| 437 | 344 | 0.114590 | 0.011306 | 0.106596 | 0.122585 | 2 |
| 438 | 340 | 0.113258 | 0.001884 | 0.111925 | 0.114590 | 2 |
| 439 | 338 | 0.112592 | 0.003769 | 0.109927 | 0.115256 | 2 |
| 440 | 332 | 0.110593 | 0.006595 | 0.105929 | 0.115256 | 2 |
| 441 | 324 | 0.107928 | 0.000942 | 0.107262 | 0.108594 | 2 |
| 442 | 324 | 0.107928 | 0.005653 | 0.103931 | 0.111925 | 2 |
| 443 | 322 | 0.107262 | 0.010364 | 0.099933 | 0.114590 | 2 |
| 444 | 320 | 0.106596 | 0.016017 | 0.095270 | 0.117921 | 2 |
| 445 | 320 | 0.106596 | 0.008480 | 0.100600 | 0.112592 | 2 |
| 446 | 314 | 0.104597 | 0.028265 | 0.084610 | 0.124584 | 2 |
| 447 | 310 | 0.103264 | 0.024497 | 0.085943 | 0.120586 | 2 |
| 448 | 305 | 0.101599 | 0.024968 | 0.083944 | 0.119254 | 2 |
| 449 | 298 | 0.099267 | 0.009422 | 0.092605 | 0.105929 | 2 |
| 450 | 292 | 0.097268 | 0.020728 | 0.082612 | 0.111925 | 2 |

|     |     |          |          |          |          |   |
|-----|-----|----------|----------|----------|----------|---|
| 451 | 290 | 0.096602 | 0.006595 | 0.091939 | 0.101266 | 2 |
| 452 | 284 | 0.094604 | 0.016017 | 0.083278 | 0.105929 | 2 |
| 453 | 278 | 0.092605 | 0.012248 | 0.083944 | 0.101266 | 2 |
| 454 | 277 | 0.092272 | 0.018373 | 0.079280 | 0.105263 | 2 |
| 455 | 264 | 0.087941 | 0.032034 | 0.065290 | 0.110593 | 2 |
| 456 | 251 | 0.083611 | 0.032505 | 0.060626 | 0.106596 | 2 |
| 457 | 186 | 0.061959 | 0.056531 | 0.021985 | 0.101932 | 2 |

-----  
+ Convergence diagnostic (standard deviation of split frequencies)  
should approach 0.0 as runs converge.

Summary statistics for branch and node parameters  
(saved to file "/infile\_converted.phy.vstat"):

| Parameter  | Mean     | Variance | 95% HPD Interval |          | Median   | PSRF+ | Nruns |
|------------|----------|----------|------------------|----------|----------|-------|-------|
|            |          |          | Lower            | Upper    |          |       |       |
| length[1]  | 0.003898 | 0.000016 | 0.000005         | 0.011906 | 0.002585 | 1.002 | 2     |
| length[2]  | 0.003963 | 0.000016 | 0.000001         | 0.011944 | 0.002700 | 1.000 | 2     |
| length[3]  | 0.004167 | 0.000017 | 0.000005         | 0.012563 | 0.002847 | 1.002 | 2     |
| length[4]  | 0.003887 | 0.000014 | 0.000000         | 0.011430 | 0.002709 | 1.004 | 2     |
| length[5]  | 0.003976 | 0.000015 | 0.000001         | 0.011918 | 0.002811 | 1.000 | 2     |
| length[6]  | 0.007399 | 0.000029 | 0.000048         | 0.018008 | 0.006318 | 1.000 | 2     |
| length[7]  | 0.004277 | 0.000018 | 0.000003         | 0.013335 | 0.002959 | 1.001 | 2     |
| length[8]  | 0.004304 | 0.000017 | 0.000012         | 0.012554 | 0.002857 | 1.000 | 2     |
| length[9]  | 0.003967 | 0.000014 | 0.000000         | 0.011936 | 0.002764 | 1.000 | 2     |
| length[10] | 0.004166 | 0.000018 | 0.000001         | 0.013269 | 0.002933 | 1.001 | 2     |
| length[11] | 0.003873 | 0.000015 | 0.000009         | 0.011328 | 0.002614 | 1.000 | 2     |
| length[12] | 0.003723 | 0.000013 | 0.000005         | 0.010983 | 0.002618 | 1.000 | 2     |
| length[13] | 0.007668 | 0.000028 | 0.000372         | 0.017515 | 0.006646 | 1.000 | 2     |
| length[14] | 0.003813 | 0.000014 | 0.000002         | 0.011150 | 0.002796 | 1.008 | 2     |
| length[15] | 0.004461 | 0.000019 | 0.000005         | 0.013563 | 0.003231 | 1.001 | 2     |
| length[16] | 0.004119 | 0.000017 | 0.000005         | 0.012343 | 0.002839 | 1.003 | 2     |
| length[17] | 0.004329 | 0.000017 | 0.000000         | 0.013142 | 0.003026 | 1.001 | 2     |
| length[18] | 0.004170 | 0.000017 | 0.000003         | 0.013018 | 0.002804 | 1.001 | 2     |
| length[19] | 0.004033 | 0.000016 | 0.000004         | 0.012407 | 0.002838 | 1.000 | 2     |
| length[20] | 0.004115 | 0.000016 | 0.000003         | 0.011826 | 0.002784 | 1.000 | 2     |
| length[21] | 0.004377 | 0.000021 | 0.000016         | 0.013003 | 0.003026 | 1.000 | 2     |
| length[22] | 0.003974 | 0.000015 | 0.000006         | 0.011634 | 0.002749 | 1.000 | 2     |
| length[23] | 0.004093 | 0.000017 | 0.000008         | 0.012927 | 0.002756 | 1.001 | 2     |
| length[24] | 0.004423 | 0.000020 | 0.000008         | 0.014039 | 0.003007 | 1.011 | 2     |
| length[25] | 0.004192 | 0.000019 | 0.000003         | 0.012897 | 0.002882 | 1.000 | 2     |
| length[26] | 0.003974 | 0.000015 | 0.000001         | 0.011712 | 0.002857 | 1.000 | 2     |
| length[27] | 0.004016 | 0.000016 | 0.000005         | 0.012234 | 0.002700 | 1.000 | 2     |
| length[28] | 0.004087 | 0.000016 | 0.000001         | 0.012144 | 0.002857 | 1.000 | 2     |
| length[29] | 0.004056 | 0.000016 | 0.000003         | 0.012213 | 0.002803 | 1.001 | 2     |
| length[30] | 0.003907 | 0.000015 | 0.000003         | 0.011894 | 0.002656 | 1.000 | 2     |
| length[31] | 0.009424 | 0.000041 | 0.000354         | 0.021476 | 0.007935 | 1.000 | 2     |
| length[32] | 0.009285 | 0.000047 | 0.000118         | 0.022402 | 0.007798 | 1.000 | 2     |
| length[33] | 0.014830 | 0.000069 | 0.001183         | 0.029545 | 0.013191 | 1.003 | 2     |
| length[34] | 0.017974 | 0.000099 | 0.002184         | 0.039031 | 0.016116 | 1.004 | 2     |
| length[35] | 0.004942 | 0.000027 | 0.000009         | 0.015127 | 0.003281 | 1.000 | 2     |
| length[36] | 0.004384 | 0.000019 | 0.000000         | 0.012497 | 0.003058 | 1.000 | 2     |
| length[37] | 0.004745 | 0.000023 | 0.000001         | 0.013758 | 0.003394 | 1.000 | 2     |
| length[38] | 0.004728 | 0.000026 | 0.000001         | 0.014818 | 0.003157 | 1.000 | 2     |
| length[39] | 0.004640 | 0.000021 | 0.000001         | 0.013896 | 0.003279 | 1.000 | 2     |
| length[40] | 0.004790 | 0.000023 | 0.000005         | 0.014338 | 0.003353 | 1.000 | 2     |
| length[41] | 0.009407 | 0.000043 | 0.000283         | 0.022357 | 0.007889 | 1.006 | 2     |
| length[42] | 0.009743 | 0.000050 | 0.000555         | 0.024446 | 0.007940 | 1.000 | 2     |
| length[43] | 0.009544 | 0.000051 | 0.000175         | 0.024038 | 0.007789 | 1.007 | 2     |
| length[44] | 0.004400 | 0.000018 | 0.000001         | 0.013461 | 0.003160 | 1.000 | 2     |
| length[45] | 0.021525 | 0.000278 | 0.000015         | 0.051944 | 0.018544 | 1.004 | 2     |
| length[46] | 0.065997 | 0.000376 | 0.028167         | 0.105710 | 0.064040 | 1.000 | 2     |
| length[47] | 0.023408 | 0.000323 | 0.000006         | 0.058804 | 0.020455 | 1.002 | 2     |
| length[48] | 0.107057 | 0.000679 | 0.057153         | 0.152646 | 0.106215 | 1.005 | 2     |
| length[49] | 0.436896 | 0.004190 | 0.302049         | 0.551248 | 0.438574 | 1.000 | 2     |
| length[50] | 0.378842 | 0.007084 | 0.223030         | 0.559129 | 0.376026 | 1.000 | 2     |
| length[51] | 0.361918 | 0.002732 | 0.260636         | 0.451162 | 0.358330 | 1.000 | 2     |
| length[52] | 0.284029 | 0.002145 | 0.196731         | 0.376941 | 0.283634 | 1.000 | 2     |
| length[53] | 0.368093 | 0.006744 | 0.178521         | 0.510033 | 0.377503 | 1.004 | 2     |
| length[54] | 0.367328 | 0.002843 | 0.270131         | 0.472313 | 0.370290 | 1.000 | 2     |
| length[55] | 0.388522 | 0.003149 | 0.283190         | 0.495083 | 0.388923 | 1.001 | 2     |
| length[56] | 0.028661 | 0.000149 | 0.007265         | 0.051581 | 0.026377 | 1.001 | 2     |
| length[57] | 0.007511 | 0.000049 | 0.000010         | 0.022176 | 0.005246 | 1.001 | 2     |
| length[58] | 0.017662 | 0.000086 | 0.002771         | 0.036850 | 0.015581 | 1.000 | 2     |
| length[59] | 0.013485 | 0.000066 | 0.001376         | 0.031075 | 0.011487 | 1.001 | 2     |
| length[60] | 0.017853 | 0.000093 | 0.001927         | 0.037421 | 0.016989 | 1.013 | 2     |
| length[61] | 0.011076 | 0.000060 | 0.000220         | 0.026464 | 0.009421 | 1.000 | 2     |
| length[62] | 0.004541 | 0.000022 | 0.000006         | 0.012928 | 0.003207 | 1.000 | 2     |

|             |          |          |          |          |          |       |   |
|-------------|----------|----------|----------|----------|----------|-------|---|
| length[63]  | 0.004498 | 0.000023 | 0.000003 | 0.013995 | 0.002977 | 1.000 | 2 |
| length[64]  | 0.004374 | 0.000019 | 0.000005 | 0.013576 | 0.003220 | 1.000 | 2 |
| length[65]  | 0.004647 | 0.000020 | 0.000016 | 0.013424 | 0.003596 | 1.000 | 2 |
| length[66]  | 0.004055 | 0.000015 | 0.000004 | 0.011990 | 0.002902 | 1.001 | 2 |
| length[67]  | 0.004335 | 0.000017 | 0.000002 | 0.012194 | 0.003018 | 1.000 | 2 |
| length[68]  | 0.004331 | 0.000016 | 0.000007 | 0.012116 | 0.003369 | 1.002 | 2 |
| length[69]  | 0.004394 | 0.000020 | 0.000001 | 0.013219 | 0.003094 | 1.000 | 2 |
| length[70]  | 0.004539 | 0.000020 | 0.000002 | 0.014033 | 0.003301 | 1.002 | 2 |
| length[71]  | 0.004381 | 0.000018 | 0.000003 | 0.012965 | 0.003092 | 1.002 | 2 |
| length[72]  | 0.004039 | 0.000016 | 0.000001 | 0.011907 | 0.002831 | 1.000 | 2 |
| length[73]  | 0.004159 | 0.000018 | 0.000000 | 0.012371 | 0.002849 | 1.001 | 2 |
| length[74]  | 0.004614 | 0.000019 | 0.000002 | 0.012986 | 0.003348 | 1.000 | 2 |
| length[75]  | 0.004285 | 0.000018 | 0.000003 | 0.013020 | 0.002977 | 1.002 | 2 |
| length[76]  | 0.006016 | 0.000039 | 0.000005 | 0.018833 | 0.003913 | 1.002 | 2 |
| length[77]  | 0.017696 | 0.000110 | 0.001671 | 0.039681 | 0.015721 | 1.002 | 2 |
| length[78]  | 0.035004 | 0.000270 | 0.002562 | 0.066915 | 0.033556 | 1.000 | 2 |
| length[79]  | 0.032101 | 0.000169 | 0.011521 | 0.058314 | 0.030136 | 1.009 | 2 |
| length[80]  | 0.011464 | 0.000080 | 0.000085 | 0.027748 | 0.009370 | 1.000 | 2 |
| length[81]  | 0.028565 | 0.000218 | 0.001031 | 0.057146 | 0.027482 | 1.009 | 2 |
| length[82]  | 0.005399 | 0.000029 | 0.000021 | 0.015908 | 0.003559 | 1.000 | 2 |
| length[83]  | 0.017309 | 0.000105 | 0.000750 | 0.037273 | 0.015402 | 1.002 | 2 |
| length[84]  | 0.005672 | 0.000033 | 0.000001 | 0.016447 | 0.003959 | 1.005 | 2 |
| length[85]  | 0.006018 | 0.000037 | 0.000007 | 0.018110 | 0.004267 | 1.000 | 2 |
| length[86]  | 0.011137 | 0.000078 | 0.000005 | 0.028052 | 0.008658 | 1.004 | 2 |
| length[87]  | 0.020440 | 0.000130 | 0.002113 | 0.040794 | 0.018624 | 1.000 | 2 |
| length[88]  | 0.022522 | 0.000147 | 0.002748 | 0.046780 | 0.020593 | 1.002 | 2 |
| length[89]  | 0.006192 | 0.000035 | 0.000001 | 0.018333 | 0.004640 | 1.000 | 2 |
| length[90]  | 0.040073 | 0.000229 | 0.015971 | 0.071946 | 0.037785 | 1.003 | 2 |
| length[91]  | 0.011082 | 0.000060 | 0.000294 | 0.026168 | 0.009357 | 1.000 | 2 |
| length[92]  | 0.011230 | 0.000059 | 0.000666 | 0.026244 | 0.009392 | 1.000 | 2 |
| length[93]  | 0.018879 | 0.000113 | 0.000494 | 0.038807 | 0.017309 | 1.000 | 2 |
| length[94]  | 0.011426 | 0.000063 | 0.000334 | 0.026894 | 0.009667 | 1.000 | 2 |
| length[95]  | 0.031182 | 0.000246 | 0.004968 | 0.060993 | 0.029373 | 1.001 | 2 |
| length[96]  | 0.052668 | 0.000871 | 0.000851 | 0.102201 | 0.053333 | 1.000 | 2 |
| length[97]  | 0.065381 | 0.000538 | 0.021907 | 0.107725 | 0.063840 | 1.004 | 2 |
| length[98]  | 0.019219 | 0.000139 | 0.001673 | 0.043514 | 0.016434 | 1.000 | 2 |
| length[99]  | 0.054614 | 0.000359 | 0.022341 | 0.092707 | 0.052237 | 1.004 | 2 |
| length[100] | 0.005988 | 0.000037 | 0.000000 | 0.018325 | 0.004259 | 1.000 | 2 |
| length[101] | 0.006276 | 0.000034 | 0.000014 | 0.017707 | 0.004505 | 1.001 | 2 |
| length[102] | 0.005583 | 0.000033 | 0.000013 | 0.017042 | 0.003751 | 1.000 | 2 |
| length[103] | 0.005269 | 0.000027 | 0.000020 | 0.016435 | 0.003650 | 1.000 | 2 |
| length[104] | 0.005355 | 0.000026 | 0.000016 | 0.014685 | 0.003954 | 1.000 | 2 |
| length[105] | 0.005346 | 0.000032 | 0.000004 | 0.016694 | 0.003530 | 1.000 | 2 |
| length[106] | 0.005334 | 0.000029 | 0.000002 | 0.015738 | 0.003727 | 1.000 | 2 |
| length[107] | 0.005428 | 0.000027 | 0.000006 | 0.015707 | 0.003945 | 1.000 | 2 |
| length[108] | 0.005333 | 0.000027 | 0.000024 | 0.016105 | 0.003719 | 1.000 | 2 |
| length[109] | 0.005565 | 0.000030 | 0.000001 | 0.015992 | 0.003952 | 1.000 | 2 |
| length[110] | 0.005502 | 0.000034 | 0.000001 | 0.016700 | 0.003760 | 1.000 | 2 |
| length[111] | 0.005562 | 0.000027 | 0.000020 | 0.016184 | 0.003979 | 1.000 | 2 |
| length[112] | 0.005326 | 0.000029 | 0.000001 | 0.017666 | 0.003540 | 1.000 | 2 |
| length[113] | 0.005348 | 0.000026 | 0.000005 | 0.015188 | 0.003916 | 1.002 | 2 |
| length[114] | 0.005278 | 0.000026 | 0.000009 | 0.015731 | 0.003771 | 1.005 | 2 |
| length[115] | 0.005682 | 0.000034 | 0.000001 | 0.016574 | 0.003895 | 1.000 | 2 |
| length[116] | 0.005066 | 0.000026 | 0.000000 | 0.015794 | 0.003505 | 1.000 | 2 |
| length[117] | 0.005391 | 0.000026 | 0.000008 | 0.015565 | 0.003986 | 1.007 | 2 |
| length[118] | 0.005036 | 0.000028 | 0.000002 | 0.015056 | 0.003310 | 1.000 | 2 |
| length[119] | 0.010886 | 0.000062 | 0.000322 | 0.026251 | 0.008887 | 1.000 | 2 |
| length[120] | 0.005068 | 0.000028 | 0.000007 | 0.016180 | 0.003462 | 1.003 | 2 |
| length[121] | 0.005096 | 0.000025 | 0.000008 | 0.016022 | 0.003542 | 1.001 | 2 |
| length[122] | 0.021206 | 0.000175 | 0.000492 | 0.046323 | 0.018663 | 1.000 | 2 |
| length[123] | 0.011917 | 0.000072 | 0.000103 | 0.028188 | 0.009977 | 1.000 | 2 |
| length[124] | 0.006041 | 0.000033 | 0.000002 | 0.017335 | 0.004289 | 1.001 | 2 |
| length[125] | 0.005974 | 0.000034 | 0.000011 | 0.018023 | 0.004235 | 1.000 | 2 |
| length[126] | 0.018966 | 0.000110 | 0.003865 | 0.039900 | 0.017046 | 1.003 | 2 |
| length[127] | 0.017615 | 0.000109 | 0.002520 | 0.037818 | 0.015414 | 1.000 | 2 |
| length[128] | 0.012663 | 0.000082 | 0.000223 | 0.029847 | 0.010574 | 1.001 | 2 |
| length[129] | 0.058599 | 0.000370 | 0.021292 | 0.093233 | 0.055785 | 1.002 | 2 |
| length[130] | 0.006176 | 0.000037 | 0.000003 | 0.018194 | 0.004390 | 1.000 | 2 |
| length[131] | 0.005784 | 0.000032 | 0.000024 | 0.017320 | 0.004200 | 1.000 | 2 |
| length[132] | 0.379502 | 0.006305 | 0.232917 | 0.538957 | 0.381223 | 1.009 | 2 |
| length[133] | 0.011857 | 0.000066 | 0.000017 | 0.026892 | 0.010973 | 1.000 | 2 |
| length[134] | 0.013573 | 0.000062 | 0.001434 | 0.029983 | 0.012102 | 1.000 | 2 |
| length[135] | 0.004808 | 0.000022 | 0.000008 | 0.013926 | 0.003452 | 1.000 | 2 |
| length[136] | 0.004496 | 0.000019 | 0.000001 | 0.013543 | 0.003251 | 1.000 | 2 |
| length[137] | 0.004877 | 0.000023 | 0.000011 | 0.013894 | 0.003295 | 1.000 | 2 |
| length[138] | 0.004669 | 0.000020 | 0.000001 | 0.013878 | 0.003260 | 1.002 | 2 |
| length[139] | 0.004770 | 0.000023 | 0.000002 | 0.013790 | 0.003381 | 1.000 | 2 |
| length[140] | 0.004835 | 0.000023 | 0.000018 | 0.014383 | 0.003246 | 1.000 | 2 |
| length[141] | 0.014066 | 0.000062 | 0.002044 | 0.029878 | 0.012819 | 1.000 | 2 |
| length[142] | 0.013874 | 0.000057 | 0.001899 | 0.028124 | 0.012439 | 1.000 | 2 |
| length[143] | 0.014231 | 0.000061 | 0.001365 | 0.028381 | 0.012709 | 1.000 | 2 |

|             |          |          |          |          |          |       |   |
|-------------|----------|----------|----------|----------|----------|-------|---|
| length[144] | 0.004926 | 0.000024 | 0.000014 | 0.014689 | 0.003348 | 1.000 | 2 |
| length[145] | 0.004722 | 0.000021 | 0.000034 | 0.014662 | 0.003339 | 1.000 | 2 |
| length[146] | 0.004484 | 0.000021 | 0.000004 | 0.013280 | 0.003102 | 1.000 | 2 |
| length[147] | 0.223004 | 0.001420 | 0.148786 | 0.288250 | 0.221469 | 1.006 | 2 |
| length[148] | 0.350171 | 0.002196 | 0.259485 | 0.433146 | 0.350765 | 1.004 | 2 |
| length[149] | 0.270848 | 0.002916 | 0.171376 | 0.379631 | 0.268795 | 1.000 | 2 |
| length[150] | 0.443348 | 0.005644 | 0.327136 | 0.631259 | 0.440925 | 1.008 | 2 |
| length[151] | 0.452591 | 0.006586 | 0.302525 | 0.584862 | 0.452473 | 1.015 | 2 |
| length[152] | 0.640462 | 0.016376 | 0.388918 | 0.876406 | 0.645539 | 1.011 | 2 |
| length[153] | 0.880776 | 0.023880 | 0.604346 | 1.233317 | 0.875358 | 1.000 | 2 |
| length[154] | 0.504157 | 0.013251 | 0.307186 | 0.753410 | 0.496469 | 1.000 | 2 |
| length[155] | 0.935632 | 0.019772 | 0.666107 | 1.218521 | 0.933123 | 1.000 | 2 |
| length[156] | 0.871013 | 0.025240 | 0.506874 | 1.164429 | 0.869220 | 1.001 | 2 |
| length[157] | 0.044916 | 0.000232 | 0.017034 | 0.074865 | 0.043664 | 1.000 | 2 |
| length[158] | 0.065426 | 0.000390 | 0.031192 | 0.106823 | 0.063812 | 1.001 | 2 |
| length[159] | 0.013834 | 0.000067 | 0.001745 | 0.030459 | 0.012047 | 1.000 | 2 |
| length[160] | 0.168143 | 0.003100 | 0.048524 | 0.266233 | 0.163592 | 1.002 | 2 |
| length[161] | 0.531138 | 0.008039 | 0.358416 | 0.681560 | 0.541387 | 1.004 | 2 |
| length[162] | 0.780860 | 0.024043 | 0.485247 | 1.070619 | 0.781009 | 1.000 | 2 |
| length[163] | 0.475458 | 0.016354 | 0.225335 | 0.702162 | 0.468207 | 1.001 | 2 |
| length[164] | 0.265645 | 0.002865 | 0.169828 | 0.376032 | 0.262783 | 1.019 | 2 |
| length[165] | 0.059422 | 0.000363 | 0.020778 | 0.094431 | 0.057744 | 1.007 | 2 |
| length[166] | 0.074235 | 0.000587 | 0.026418 | 0.120808 | 0.072809 | 1.000 | 2 |
| length[167] | 0.031162 | 0.000127 | 0.014364 | 0.055950 | 0.029746 | 1.000 | 2 |
| length[168] | 0.817806 | 0.027913 | 0.472144 | 1.128785 | 0.808016 | 1.000 | 2 |
| length[169] | 0.344302 | 0.007082 | 0.160456 | 0.482099 | 0.343271 | 1.002 | 2 |
| length[170] | 0.043352 | 0.000219 | 0.015641 | 0.069331 | 0.040910 | 1.002 | 2 |
| length[171] | 0.431412 | 0.005513 | 0.278163 | 0.563007 | 0.428096 | 1.001 | 2 |
| length[172] | 0.489287 | 0.004851 | 0.356996 | 0.621989 | 0.486262 | 1.002 | 2 |
| length[173] | 0.719693 | 0.020435 | 0.459668 | 1.007544 | 0.705608 | 1.001 | 2 |
| length[174] | 0.697234 | 0.011198 | 0.487095 | 0.886044 | 0.686237 | 1.007 | 2 |
| length[175] | 0.466003 | 0.005125 | 0.328230 | 0.617040 | 0.463353 | 1.008 | 2 |
| length[176] | 1.022299 | 0.028458 | 0.723635 | 1.353031 | 1.017192 | 1.001 | 2 |
| length[177] | 0.384823 | 0.008728 | 0.219907 | 0.558458 | 0.378956 | 1.001 | 2 |
| length[178] | 0.015688 | 0.000061 | 0.003866 | 0.031036 | 0.014184 | 1.002 | 2 |
| length[179] | 0.041425 | 0.000169 | 0.020432 | 0.069009 | 0.040251 | 1.000 | 2 |
| length[180] | 0.181177 | 0.003128 | 0.070048 | 0.283030 | 0.181415 | 1.008 | 2 |
| length[181] | 0.588477 | 0.014005 | 0.373040 | 0.837870 | 0.583864 | 1.007 | 2 |
| length[182] | 0.842678 | 0.018171 | 0.584329 | 1.094627 | 0.840597 | 1.010 | 2 |
| length[183] | 0.442993 | 0.007576 | 0.287864 | 0.621108 | 0.442111 | 1.009 | 2 |
| length[184] | 0.021460 | 0.000125 | 0.004024 | 0.042882 | 0.019631 | 1.001 | 2 |
| length[185] | 0.032962 | 0.000198 | 0.010073 | 0.060264 | 0.031160 | 1.009 | 2 |
| length[186] | 0.069919 | 0.000427 | 0.031388 | 0.106302 | 0.069194 | 1.001 | 2 |
| length[187] | 0.024151 | 0.000109 | 0.006739 | 0.044788 | 0.022641 | 1.000 | 2 |
| length[188] | 0.015964 | 0.000063 | 0.002263 | 0.032652 | 0.014356 | 1.000 | 2 |
| length[189] | 0.227597 | 0.002835 | 0.133962 | 0.331000 | 0.223166 | 1.001 | 2 |
| length[190] | 0.351940 | 0.002406 | 0.260094 | 0.445153 | 0.349662 | 1.000 | 2 |
| length[191] | 0.416049 | 0.004888 | 0.297055 | 0.566138 | 0.416820 | 1.001 | 2 |
| length[192] | 0.019064 | 0.000083 | 0.004221 | 0.036953 | 0.017860 | 1.003 | 2 |
| length[193] | 0.653020 | 0.009171 | 0.485807 | 0.847602 | 0.646655 | 1.019 | 2 |
| length[194] | 0.022936 | 0.000100 | 0.006855 | 0.043998 | 0.022139 | 1.002 | 2 |
| length[195] | 0.337523 | 0.003412 | 0.223385 | 0.457982 | 0.335049 | 1.004 | 2 |
| length[196] | 0.019699 | 0.000085 | 0.004989 | 0.038130 | 0.018201 | 1.000 | 2 |
| length[197] | 0.046883 | 0.000258 | 0.018576 | 0.079022 | 0.045681 | 1.000 | 2 |
| length[198] | 0.212821 | 0.002360 | 0.117784 | 0.299184 | 0.211314 | 1.007 | 2 |
| length[199] | 0.250393 | 0.004108 | 0.123719 | 0.374853 | 0.246169 | 1.000 | 2 |
| length[200] | 1.008987 | 0.027530 | 0.741681 | 1.334311 | 0.989002 | 1.000 | 2 |
| length[201] | 0.737297 | 0.015652 | 0.515754 | 0.978037 | 0.728489 | 1.020 | 2 |
| length[202] | 0.074379 | 0.000389 | 0.037683 | 0.115207 | 0.072731 | 1.004 | 2 |
| length[203] | 0.084482 | 0.000799 | 0.028327 | 0.135752 | 0.083525 | 1.007 | 2 |
| length[204] | 0.012452 | 0.000045 | 0.001844 | 0.026322 | 0.011522 | 1.000 | 2 |
| length[205] | 0.104526 | 0.001230 | 0.041256 | 0.176754 | 0.104282 | 1.001 | 2 |
| length[206] | 0.089404 | 0.001022 | 0.029348 | 0.147478 | 0.087560 | 1.004 | 2 |
| length[207] | 0.016100 | 0.000097 | 0.001074 | 0.036222 | 0.013929 | 1.000 | 2 |
| length[208] | 0.016547 | 0.000092 | 0.001817 | 0.034378 | 0.015133 | 1.000 | 2 |
| length[209] | 0.019617 | 0.000127 | 0.001586 | 0.042358 | 0.017342 | 1.001 | 2 |
| length[210] | 0.009413 | 0.000048 | 0.000298 | 0.022687 | 0.007936 | 1.002 | 2 |
| length[211] | 0.028059 | 0.000204 | 0.004121 | 0.055871 | 0.025910 | 1.000 | 2 |
| length[212] | 0.009642 | 0.000045 | 0.000724 | 0.022752 | 0.008172 | 1.000 | 2 |
| length[213] | 0.347937 | 0.013270 | 0.129550 | 0.590315 | 0.343743 | 1.000 | 2 |
| length[214] | 0.354580 | 0.010307 | 0.171372 | 0.580068 | 0.349393 | 1.000 | 2 |
| length[215] | 0.011316 | 0.000067 | 0.000309 | 0.026679 | 0.009272 | 1.009 | 2 |
| length[216] | 0.048750 | 0.000419 | 0.010333 | 0.088701 | 0.046086 | 1.000 | 2 |
| length[217] | 0.285255 | 0.004512 | 0.156671 | 0.412762 | 0.284244 | 1.001 | 2 |
| length[218] | 0.449109 | 0.023650 | 0.136222 | 0.723458 | 0.436197 | 1.001 | 2 |
| length[219] | 0.453392 | 0.027917 | 0.118278 | 0.756067 | 0.445215 | 1.002 | 2 |
| length[220] | 0.018646 | 0.000089 | 0.003892 | 0.039068 | 0.016887 | 1.001 | 2 |
| length[221] | 0.014671 | 0.000077 | 0.002183 | 0.033338 | 0.012912 | 1.000 | 2 |
| length[222] | 0.008800 | 0.000042 | 0.000124 | 0.021383 | 0.007419 | 1.002 | 2 |
| length[223] | 0.014384 | 0.000066 | 0.001646 | 0.029721 | 0.013139 | 1.002 | 2 |
| length[224] | 0.016205 | 0.000093 | 0.001298 | 0.033884 | 0.013987 | 1.001 | 2 |



|             |          |          |          |          |          |       |   |
|-------------|----------|----------|----------|----------|----------|-------|---|
| length[225] | 0.017241 | 0.000090 | 0.002160 | 0.034688 | 0.015587 | 1.000 | 2 |
| length[226] | 0.015229 | 0.000093 | 0.000487 | 0.034378 | 0.013434 | 1.000 | 2 |
| length[227] | 0.161543 | 0.002384 | 0.062204 | 0.246836 | 0.159123 | 1.014 | 2 |
| length[228] | 0.040158 | 0.000245 | 0.014094 | 0.071303 | 0.038373 | 1.003 | 2 |
| length[229] | 0.397313 | 0.017088 | 0.156329 | 0.675968 | 0.391415 | 1.000 | 2 |
| length[230] | 0.407809 | 0.025899 | 0.116828 | 0.734238 | 0.398505 | 1.000 | 2 |
| length[231] | 0.007899 | 0.000033 | 0.000310 | 0.019264 | 0.006618 | 1.000 | 2 |
| length[232] | 0.010822 | 0.000058 | 0.000218 | 0.026445 | 0.008919 | 1.000 | 2 |
| length[233] | 0.401383 | 0.015404 | 0.170234 | 0.645756 | 0.395718 | 1.005 | 2 |
| length[234] | 0.360656 | 0.019075 | 0.094208 | 0.611737 | 0.356135 | 1.000 | 2 |
| length[235] | 0.016431 | 0.000096 | 0.001702 | 0.035205 | 0.014870 | 1.000 | 2 |
| length[236] | 0.035216 | 0.000426 | 0.002923 | 0.076293 | 0.031568 | 1.000 | 2 |
| length[237] | 0.154557 | 0.004404 | 0.028576 | 0.281645 | 0.152379 | 1.003 | 2 |
| length[238] | 0.039272 | 0.000277 | 0.011456 | 0.075955 | 0.036806 | 1.000 | 2 |
| length[239] | 0.012859 | 0.000082 | 0.000148 | 0.031220 | 0.010815 | 1.000 | 2 |
| length[240] | 0.013285 | 0.000079 | 0.000662 | 0.031489 | 0.011268 | 1.000 | 2 |
| length[241] | 0.010356 | 0.000056 | 0.000482 | 0.025342 | 0.008622 | 1.005 | 2 |
| length[242] | 0.024712 | 0.000169 | 0.000086 | 0.049700 | 0.023264 | 1.006 | 2 |
| length[243] | 0.015581 | 0.000105 | 0.000626 | 0.035804 | 0.013532 | 1.001 | 2 |
| length[244] | 0.175423 | 0.004025 | 0.046579 | 0.282341 | 0.177478 | 1.000 | 2 |
| length[245] | 0.046122 | 0.000367 | 0.012550 | 0.088902 | 0.044504 | 1.003 | 2 |
| length[246] | 0.014024 | 0.000074 | 0.001311 | 0.029834 | 0.012237 | 1.003 | 2 |
| length[247] | 0.025379 | 0.000220 | 0.000602 | 0.054190 | 0.022787 | 1.005 | 2 |
| length[248] | 0.010189 | 0.000049 | 0.000094 | 0.023027 | 0.008893 | 1.002 | 2 |
| length[249] | 0.012178 | 0.000061 | 0.000099 | 0.027450 | 0.010872 | 1.000 | 2 |
| length[250] | 0.011454 | 0.000067 | 0.000084 | 0.027035 | 0.009591 | 1.000 | 2 |
| length[251] | 0.018726 | 0.000096 | 0.001106 | 0.036841 | 0.017339 | 1.000 | 2 |
| length[252] | 0.012699 | 0.000059 | 0.000412 | 0.026680 | 0.011259 | 1.000 | 2 |
| length[253] | 0.011278 | 0.000069 | 0.000001 | 0.027529 | 0.009530 | 1.000 | 2 |
| length[254] | 0.015864 | 0.000106 | 0.000019 | 0.034783 | 0.014566 | 1.001 | 2 |
| length[255] | 0.023139 | 0.000154 | 0.000002 | 0.045738 | 0.021486 | 1.000 | 2 |
| length[256] | 0.014750 | 0.000098 | 0.000756 | 0.033885 | 0.012529 | 1.000 | 2 |
| length[257] | 0.109999 | 0.002309 | 0.026538 | 0.208542 | 0.105621 | 1.000 | 2 |
| length[258] | 0.227817 | 0.008196 | 0.043484 | 0.389319 | 0.230682 | 1.007 | 2 |
| length[259] | 0.026174 | 0.000161 | 0.003477 | 0.049899 | 0.024253 | 1.000 | 2 |
| length[260] | 0.007069 | 0.000030 | 0.000012 | 0.017638 | 0.005730 | 1.000 | 2 |
| length[261] | 0.269919 | 0.017174 | 0.025879 | 0.523383 | 0.255417 | 1.011 | 2 |
| length[262] | 0.009444 | 0.000043 | 0.000531 | 0.023179 | 0.008033 | 1.008 | 2 |
| length[263] | 0.159385 | 0.004175 | 0.020985 | 0.269871 | 0.162101 | 1.004 | 2 |
| length[264] | 0.306984 | 0.019463 | 0.013050 | 0.549110 | 0.301512 | 1.001 | 2 |
| length[265] | 0.030641 | 0.000198 | 0.001080 | 0.055297 | 0.029470 | 1.001 | 2 |
| length[266] | 0.027486 | 0.000249 | 0.001005 | 0.056284 | 0.025494 | 1.000 | 2 |
| length[267] | 0.026499 | 0.000217 | 0.000065 | 0.054060 | 0.025101 | 1.006 | 2 |
| length[268] | 0.022878 | 0.000141 | 0.000116 | 0.043722 | 0.021818 | 1.001 | 2 |
| length[269] | 0.011562 | 0.000071 | 0.000543 | 0.029045 | 0.009682 | 1.003 | 2 |
| length[270] | 0.172310 | 0.009572 | 0.000882 | 0.355866 | 0.158927 | 1.002 | 2 |
| length[271] | 0.026411 | 0.000205 | 0.002494 | 0.053147 | 0.024991 | 1.003 | 2 |
| length[272] | 0.331751 | 0.023295 | 0.055469 | 0.616983 | 0.323331 | 1.001 | 2 |
| length[273] | 0.009746 | 0.000059 | 0.000012 | 0.024660 | 0.007925 | 1.002 | 2 |
| length[274] | 0.011006 | 0.000066 | 0.000009 | 0.027179 | 0.009291 | 1.001 | 2 |
| length[275] | 0.043128 | 0.000581 | 0.000002 | 0.083136 | 0.040705 | 1.035 | 2 |
| length[276] | 0.015192 | 0.000112 | 0.000020 | 0.036034 | 0.013224 | 1.000 | 2 |
| length[277] | 0.254862 | 0.009736 | 0.026394 | 0.403456 | 0.266955 | 1.000 | 2 |
| length[278] | 0.029147 | 0.000241 | 0.001922 | 0.056291 | 0.027594 | 1.000 | 2 |
| length[279] | 0.008208 | 0.000033 | 0.000072 | 0.019432 | 0.006908 | 1.004 | 2 |
| length[280] | 0.014614 | 0.000111 | 0.000039 | 0.034241 | 0.013074 | 1.000 | 2 |
| length[281] | 0.009820 | 0.000042 | 0.000610 | 0.022316 | 0.008468 | 1.000 | 2 |
| length[282] | 0.023876 | 0.000212 | 0.000002 | 0.050085 | 0.021592 | 1.002 | 2 |
| length[283] | 0.023255 | 0.000147 | 0.003187 | 0.046409 | 0.021639 | 0.999 | 2 |
| length[284] | 0.246496 | 0.017796 | 0.010766 | 0.486796 | 0.246717 | 1.006 | 2 |
| length[285] | 0.196716 | 0.018998 | 0.002463 | 0.453938 | 0.162744 | 1.002 | 2 |
| length[286] | 0.247207 | 0.013280 | 0.026740 | 0.456811 | 0.242675 | 1.034 | 2 |
| length[287] | 0.250129 | 0.016959 | 0.032853 | 0.504329 | 0.235359 | 1.002 | 2 |
| length[288] | 0.111150 | 0.002274 | 0.024659 | 0.207549 | 0.108136 | 1.014 | 2 |
| length[289] | 0.012406 | 0.000093 | 0.000021 | 0.031520 | 0.010252 | 1.000 | 2 |
| length[290] | 0.282748 | 0.016587 | 0.046017 | 0.529803 | 0.274200 | 1.000 | 2 |
| length[291] | 0.010814 | 0.000058 | 0.000045 | 0.025151 | 0.009673 | 1.000 | 2 |
| length[292] | 0.010291 | 0.000075 | 0.000020 | 0.026404 | 0.008032 | 0.999 | 2 |
| length[293] | 0.214623 | 0.015547 | 0.001086 | 0.411968 | 0.205919 | 1.002 | 2 |
| length[294] | 0.010562 | 0.000051 | 0.000045 | 0.024225 | 0.009981 | 1.013 | 2 |
| length[295] | 0.010946 | 0.000070 | 0.000099 | 0.027447 | 0.008818 | 0.999 | 2 |
| length[296] | 0.004573 | 0.000022 | 0.000003 | 0.014195 | 0.002995 | 1.000 | 2 |
| length[297] | 0.004473 | 0.000020 | 0.000000 | 0.013325 | 0.003179 | 1.000 | 2 |
| length[298] | 0.004749 | 0.000020 | 0.000005 | 0.013683 | 0.003437 | 1.000 | 2 |
| length[299] | 0.019823 | 0.000136 | 0.000006 | 0.040476 | 0.018778 | 1.016 | 2 |
| length[300] | 0.004694 | 0.000022 | 0.000006 | 0.014409 | 0.003018 | 0.999 | 2 |
| length[301] | 0.004994 | 0.000023 | 0.000006 | 0.014994 | 0.003580 | 1.000 | 2 |
| length[302] | 0.004599 | 0.000023 | 0.000003 | 0.013284 | 0.003069 | 1.000 | 2 |
| length[303] | 0.004900 | 0.000024 | 0.000015 | 0.014459 | 0.003268 | 1.002 | 2 |
| length[304] | 0.004932 | 0.000026 | 0.000010 | 0.016892 | 0.003177 | 0.999 | 2 |
| length[305] | 0.004769 | 0.000027 | 0.000004 | 0.014745 | 0.003306 | 0.999 | 2 |

|             |          |          |           |          |          |       |   |
|-------------|----------|----------|-----------|----------|----------|-------|---|
| length[306] | 0.004361 | 0.000019 | 0.000002  | 0.012980 | 0.003116 | 1.001 | 2 |
| length[307] | 0.004394 | 0.000021 | 0.000004  | 0.014035 | 0.002925 | 0.999 | 2 |
| length[308] | 0.115711 | 0.002223 | 0.026091  | 0.205092 | 0.114760 | 1.012 | 2 |
| length[309] | 0.266732 | 0.022242 | 0.008414  | 0.540830 | 0.241178 | 1.006 | 2 |
| length[310] | 0.003971 | 0.000015 | 0.000001  | 0.011135 | 0.002765 | 1.000 | 2 |
| length[311] | 0.140025 | 0.009918 | 0.002164  | 0.333426 | 0.125035 | 0.999 | 2 |
| length[312] | 0.004362 | 0.000018 | 0.000003  | 0.012568 | 0.003149 | 0.999 | 2 |
| length[313] | 0.004766 | 0.000023 | 0.000010  | 0.014532 | 0.003381 | 0.999 | 2 |
| length[314] | 0.024089 | 0.000205 | 0.000315  | 0.050050 | 0.022611 | 1.001 | 2 |
| length[315] | 0.004452 | 0.000020 | 0.000000  | 0.013501 | 0.003002 | 1.005 | 2 |
| length[316] | 0.021474 | 0.000129 | 0.002322  | 0.044069 | 0.019033 | 0.999 | 2 |
| length[317] | 0.005704 | 0.000025 | 0.000009  | 0.015606 | 0.004313 | 1.001 | 2 |
| length[318] | 0.007018 | 0.000040 | 0.000008  | 0.020151 | 0.005158 | 0.999 | 2 |
| length[319] | 0.010107 | 0.000053 | 0.0000220 | 0.025164 | 0.008299 | 0.999 | 2 |
| length[320] | 0.012189 | 0.000081 | 0.000592  | 0.029877 | 0.010114 | 1.001 | 2 |
| length[321] | 0.004686 | 0.000021 | 0.000010  | 0.014044 | 0.003126 | 0.999 | 2 |
| length[322] | 0.010565 | 0.000061 | 0.000068  | 0.024510 | 0.008839 | 1.000 | 2 |
| length[323] | 0.004750 | 0.000022 | 0.000010  | 0.013170 | 0.003520 | 1.004 | 2 |
| length[324] | 0.193970 | 0.013529 | 0.011138  | 0.415758 | 0.179179 | 1.004 | 2 |
| length[325] | 0.004613 | 0.000020 | 0.000006  | 0.013006 | 0.003258 | 0.999 | 2 |
| length[326] | 0.293956 | 0.020465 | 0.045256  | 0.570054 | 0.283076 | 1.013 | 2 |
| length[327] | 0.089943 | 0.001590 | 0.013183  | 0.162428 | 0.088281 | 0.999 | 2 |
| length[328] | 0.018938 | 0.000090 | 0.002967  | 0.037769 | 0.017854 | 1.006 | 2 |
| length[329] | 0.006274 | 0.000038 | 0.000014  | 0.017453 | 0.004527 | 0.999 | 2 |
| length[330] | 0.005659 | 0.000034 | 0.000005  | 0.016171 | 0.003753 | 0.999 | 2 |
| length[331] | 0.005334 | 0.000031 | 0.000018  | 0.015975 | 0.003526 | 1.000 | 2 |
| length[332] | 0.138111 | 0.005145 | 0.001594  | 0.259920 | 0.122954 | 1.026 | 2 |
| length[333] | 0.004993 | 0.000025 | 0.000001  | 0.015306 | 0.003534 | 1.011 | 2 |
| length[334] | 0.007545 | 0.000051 | 0.000020  | 0.021812 | 0.005564 | 0.999 | 2 |
| length[335] | 0.004450 | 0.000020 | 0.000003  | 0.012984 | 0.003210 | 1.004 | 2 |
| length[336] | 0.004165 | 0.000019 | 0.000006  | 0.011660 | 0.002928 | 0.999 | 2 |
| length[337] | 0.005088 | 0.000027 | 0.000013  | 0.014207 | 0.003513 | 0.999 | 2 |
| length[338] | 0.004274 | 0.000017 | 0.000009  | 0.012419 | 0.003171 | 1.001 | 2 |
| length[339] | 0.004430 | 0.000020 | 0.000001  | 0.013251 | 0.002914 | 0.999 | 2 |
| length[340] | 0.114147 | 0.006816 | 0.000041  | 0.259294 | 0.097155 | 0.999 | 2 |
| length[341] | 0.003975 | 0.000015 | 0.000009  | 0.011874 | 0.002815 | 1.014 | 2 |
| length[342] | 0.005377 | 0.000027 | 0.000014  | 0.016225 | 0.003758 | 0.998 | 2 |
| length[343] | 0.003926 | 0.000014 | 0.000007  | 0.011337 | 0.002852 | 1.000 | 2 |
| length[344] | 0.005402 | 0.000031 | 0.000010  | 0.016119 | 0.003606 | 0.999 | 2 |
| length[345] | 0.005196 | 0.000027 | 0.000001  | 0.014602 | 0.003502 | 0.999 | 2 |
| length[346] | 0.005622 | 0.000030 | 0.000011  | 0.016655 | 0.003926 | 0.998 | 2 |
| length[347] | 0.005596 | 0.000027 | 0.000010  | 0.016831 | 0.004278 | 0.999 | 2 |
| length[348] | 0.037733 | 0.000390 | 0.000061  | 0.066762 | 0.039619 | 1.013 | 2 |
| length[349] | 0.114516 | 0.005359 | 0.000270  | 0.239548 | 0.111762 | 1.003 | 2 |
| length[350] | 0.115182 | 0.007693 | 0.000262  | 0.281746 | 0.094088 | 1.084 | 2 |
| length[351] | 0.004188 | 0.000018 | 0.000011  | 0.013426 | 0.002901 | 1.005 | 2 |
| length[352] | 0.005286 | 0.000027 | 0.000002  | 0.016349 | 0.003638 | 0.998 | 2 |
| length[353] | 0.005175 | 0.000023 | 0.000071  | 0.014519 | 0.003957 | 0.999 | 2 |
| length[354] | 0.005025 | 0.000021 | 0.000012  | 0.014272 | 0.003684 | 0.998 | 2 |
| length[355] | 0.005892 | 0.000033 | 0.000010  | 0.017163 | 0.004167 | 1.000 | 2 |
| length[356] | 0.004132 | 0.000015 | 0.000001  | 0.011278 | 0.002975 | 1.000 | 2 |
| length[357] | 0.005254 | 0.000028 | 0.000001  | 0.015433 | 0.003540 | 1.005 | 2 |
| length[358] | 0.004188 | 0.000017 | 0.000015  | 0.012216 | 0.003119 | 0.998 | 2 |
| length[359] | 0.005165 | 0.000026 | 0.000001  | 0.014415 | 0.003673 | 0.998 | 2 |
| length[360] | 0.004170 | 0.000019 | 0.000008  | 0.013942 | 0.002937 | 0.999 | 2 |
| length[361] | 0.003751 | 0.000013 | 0.000011  | 0.011758 | 0.002619 | 0.999 | 2 |
| length[362] | 0.004478 | 0.000021 | 0.000004  | 0.013558 | 0.003065 | 1.006 | 2 |
| length[363] | 0.005479 | 0.000028 | 0.000013  | 0.016115 | 0.003731 | 0.999 | 2 |
| length[364] | 0.005422 | 0.000030 | 0.000002  | 0.016561 | 0.003625 | 0.998 | 2 |
| length[365] | 0.004169 | 0.000017 | 0.000002  | 0.011887 | 0.002866 | 1.002 | 2 |
| length[366] | 0.005245 | 0.000028 | 0.000005  | 0.015693 | 0.003703 | 0.998 | 2 |
| length[367] | 0.004263 | 0.000017 | 0.000003  | 0.012691 | 0.002995 | 0.998 | 2 |
| length[368] | 0.004052 | 0.000013 | 0.000010  | 0.011092 | 0.003022 | 0.999 | 2 |
| length[369] | 0.004508 | 0.000022 | 0.000001  | 0.012472 | 0.003100 | 1.007 | 2 |
| length[370] | 0.005274 | 0.000030 | 0.000013  | 0.016778 | 0.003731 | 0.998 | 2 |
| length[371] | 0.005368 | 0.000025 | 0.000014  | 0.015488 | 0.003961 | 0.999 | 2 |
| length[372] | 0.153254 | 0.005000 | 0.041899  | 0.313732 | 0.149463 | 1.006 | 2 |
| length[373] | 0.004141 | 0.000016 | 0.000001  | 0.012462 | 0.002780 | 0.999 | 2 |
| length[374] | 0.003961 | 0.000016 | 0.000002  | 0.012324 | 0.002608 | 1.007 | 2 |
| length[375] | 0.020452 | 0.000199 | 0.000006  | 0.048424 | 0.017814 | 0.998 | 2 |
| length[376] | 0.006517 | 0.000039 | 0.000017  | 0.020049 | 0.004512 | 1.001 | 2 |
| length[377] | 0.005475 | 0.000030 | 0.000014  | 0.015644 | 0.003911 | 1.002 | 2 |
| length[378] | 0.240035 | 0.015360 | 0.024791  | 0.459381 | 0.223867 | 1.010 | 2 |
| length[379] | 0.004590 | 0.000018 | 0.000021  | 0.012280 | 0.003326 | 0.998 | 2 |
| length[380] | 0.004087 | 0.000015 | 0.000006  | 0.010756 | 0.002843 | 0.998 | 2 |
| length[381] | 0.233890 | 0.010667 | 0.042657  | 0.439108 | 0.233670 | 1.027 | 2 |
| length[382] | 0.004045 | 0.000016 | 0.000011  | 0.011732 | 0.002680 | 1.000 | 2 |
| length[383] | 0.004297 | 0.000017 | 0.000018  | 0.012355 | 0.003030 | 1.000 | 2 |
| length[384] | 0.004221 | 0.000021 | 0.000021  | 0.012628 | 0.002767 | 0.999 | 2 |
| length[385] | 0.003961 | 0.000016 | 0.000017  | 0.012377 | 0.002851 | 1.001 | 2 |
| length[386] | 0.004120 | 0.000016 | 0.000004  | 0.011328 | 0.002685 | 0.998 | 2 |

|             |          |          |           |          |          |       |   |
|-------------|----------|----------|-----------|----------|----------|-------|---|
| length[387] | 0.004188 | 0.000016 | 0.000020  | 0.012203 | 0.002742 | 1.012 | 2 |
| length[388] | 0.004362 | 0.000018 | 0.000029  | 0.012579 | 0.003029 | 0.998 | 2 |
| length[389] | 0.011568 | 0.000080 | 0.000046  | 0.028419 | 0.009834 | 0.998 | 2 |
| length[390] | 0.003854 | 0.000014 | 0.000001  | 0.011745 | 0.002725 | 0.999 | 2 |
| length[391] | 0.004343 | 0.000018 | 0.000006  | 0.013634 | 0.002917 | 0.999 | 2 |
| length[392] | 0.003808 | 0.000015 | 0.000001  | 0.011694 | 0.002623 | 1.000 | 2 |
| length[393] | 0.003774 | 0.000013 | 0.000008  | 0.011283 | 0.002746 | 0.998 | 2 |
| length[394] | 0.004055 | 0.000018 | 0.000013  | 0.012780 | 0.002875 | 0.998 | 2 |
| length[395] | 0.003971 | 0.000013 | 0.000012  | 0.011155 | 0.002763 | 0.998 | 2 |
| length[396] | 0.023681 | 0.000252 | 0.000014  | 0.053970 | 0.021723 | 1.009 | 2 |
| length[397] | 0.020194 | 0.000144 | 0.0000184 | 0.043387 | 0.017889 | 1.004 | 2 |
| length[398] | 0.154208 | 0.010402 | 0.001352  | 0.328365 | 0.140167 | 0.999 | 2 |
| length[399] | 0.193948 | 0.013554 | 0.001794  | 0.413797 | 0.178772 | 1.001 | 2 |
| length[400] | 0.009440 | 0.000056 | 0.0000147 | 0.022853 | 0.006960 | 1.002 | 2 |
| length[401] | 0.004201 | 0.000016 | 0.000022  | 0.012712 | 0.002987 | 0.998 | 2 |
| length[402] | 0.124438 | 0.003869 | 0.012112  | 0.233010 | 0.119195 | 0.998 | 2 |
| length[403] | 0.004900 | 0.000023 | 0.000002  | 0.013714 | 0.003397 | 1.001 | 2 |
| length[404] | 0.004866 | 0.000024 | 0.000011  | 0.013760 | 0.003631 | 1.000 | 2 |
| length[405] | 0.004724 | 0.000021 | 0.000003  | 0.013804 | 0.003469 | 1.018 | 2 |
| length[406] | 0.004035 | 0.000013 | 0.000023  | 0.011418 | 0.003041 | 0.998 | 2 |
| length[407] | 0.004256 | 0.000019 | 0.000002  | 0.012938 | 0.002991 | 0.999 | 2 |
| length[408] | 0.004658 | 0.000024 | 0.000002  | 0.013325 | 0.003206 | 0.998 | 2 |
| length[409] | 0.004812 | 0.000028 | 0.000008  | 0.016134 | 0.002951 | 1.006 | 2 |
| length[410] | 0.004890 | 0.000025 | 0.000001  | 0.014857 | 0.003528 | 0.998 | 2 |
| length[411] | 0.005094 | 0.000025 | 0.000007  | 0.014541 | 0.003535 | 1.002 | 2 |
| length[412] | 0.003935 | 0.000015 | 0.000010  | 0.012484 | 0.002838 | 0.999 | 2 |
| length[413] | 0.015317 | 0.000085 | 0.000382  | 0.033296 | 0.013827 | 1.007 | 2 |
| length[414] | 0.005119 | 0.000024 | 0.000028  | 0.015124 | 0.003527 | 1.000 | 2 |
| length[415] | 0.005068 | 0.000023 | 0.000000  | 0.014591 | 0.003435 | 0.998 | 2 |
| length[416] | 0.016759 | 0.000105 | 0.001915  | 0.037318 | 0.015236 | 1.007 | 2 |
| length[417] | 0.004144 | 0.000017 | 0.000018  | 0.012355 | 0.002838 | 0.998 | 2 |
| length[418] | 0.005428 | 0.000026 | 0.000039  | 0.015509 | 0.004151 | 1.020 | 2 |
| length[419] | 0.009142 | 0.000072 | 0.000011  | 0.026805 | 0.006377 | 1.017 | 2 |
| length[420] | 0.004291 | 0.000017 | 0.000007  | 0.012858 | 0.003146 | 0.999 | 2 |
| length[421] | 0.005582 | 0.000029 | 0.000081  | 0.018143 | 0.004070 | 1.000 | 2 |
| length[422] | 0.195271 | 0.012692 | 0.009928  | 0.403113 | 0.172987 | 1.013 | 2 |
| length[423] | 0.004508 | 0.000021 | 0.000008  | 0.013150 | 0.003205 | 0.998 | 2 |
| length[424] | 0.004935 | 0.000026 | 0.000000  | 0.014356 | 0.003444 | 1.001 | 2 |
| length[425] | 0.003995 | 0.000016 | 0.000007  | 0.011271 | 0.002797 | 1.001 | 2 |
| length[426] | 0.004035 | 0.000017 | 0.000017  | 0.012317 | 0.002668 | 1.006 | 2 |
| length[427] | 0.004808 | 0.000025 | 0.000032  | 0.016611 | 0.003343 | 0.998 | 2 |
| length[428] | 0.110369 | 0.002569 | 0.018765  | 0.209898 | 0.107755 | 1.009 | 2 |
| length[429] | 0.003970 | 0.000016 | 0.000002  | 0.011701 | 0.002625 | 0.997 | 2 |
| length[430] | 0.014181 | 0.000125 | 0.000337  | 0.035854 | 0.011897 | 0.999 | 2 |
| length[431] | 0.019344 | 0.000294 | 0.000068  | 0.052581 | 0.015623 | 0.999 | 2 |
| length[432] | 0.004469 | 0.000022 | 0.000010  | 0.015023 | 0.002878 | 1.004 | 2 |
| length[433] | 0.005461 | 0.000035 | 0.000006  | 0.017629 | 0.003691 | 0.997 | 2 |
| length[434] | 0.004276 | 0.000018 | 0.000017  | 0.013174 | 0.003122 | 0.997 | 2 |
| length[435] | 0.004351 | 0.000022 | 0.000013  | 0.013113 | 0.002811 | 1.005 | 2 |
| length[436] | 0.005099 | 0.000025 | 0.000007  | 0.014948 | 0.003596 | 0.998 | 2 |
| length[437] | 0.003555 | 0.000011 | 0.000005  | 0.009649 | 0.002601 | 0.997 | 2 |
| length[438] | 0.003746 | 0.000015 | 0.000026  | 0.011858 | 0.002594 | 1.019 | 2 |
| length[439] | 0.004884 | 0.000024 | 0.000009  | 0.015669 | 0.003201 | 1.002 | 2 |
| length[440] | 0.004623 | 0.000022 | 0.000019  | 0.013489 | 0.003028 | 0.997 | 2 |
| length[441] | 0.005459 | 0.000033 | 0.000012  | 0.016599 | 0.003735 | 1.008 | 2 |
| length[442] | 0.004635 | 0.000018 | 0.000031  | 0.012651 | 0.003186 | 0.998 | 2 |
| length[443] | 0.006253 | 0.000045 | 0.000019  | 0.018441 | 0.003937 | 0.998 | 2 |
| length[444] | 0.005123 | 0.000028 | 0.000016  | 0.016401 | 0.003416 | 0.997 | 2 |
| length[445] | 0.108275 | 0.006267 | 0.007105  | 0.285127 | 0.084360 | 1.014 | 2 |
| length[446] | 0.011120 | 0.000074 | 0.000032  | 0.026988 | 0.010060 | 0.999 | 2 |
| length[447] | 0.012678 | 0.000070 | 0.000729  | 0.028999 | 0.011143 | 0.997 | 2 |
| length[448] | 0.003928 | 0.000015 | 0.000005  | 0.010999 | 0.002986 | 1.005 | 2 |
| length[449] | 0.012954 | 0.000120 | 0.000014  | 0.035277 | 0.009114 | 1.000 | 2 |
| length[450] | 0.006012 | 0.000034 | 0.000001  | 0.015875 | 0.004128 | 1.019 | 2 |
| length[451] | 0.003858 | 0.000014 | 0.000008  | 0.012246 | 0.002803 | 1.000 | 2 |
| length[452] | 0.005887 | 0.000039 | 0.000029  | 0.021211 | 0.003417 | 1.020 | 2 |
| length[453] | 0.004375 | 0.000020 | 0.000003  | 0.012484 | 0.002987 | 1.002 | 2 |
| length[454] | 0.004365 | 0.000018 | 0.000008  | 0.012564 | 0.003295 | 0.997 | 2 |
| length[455] | 0.085286 | 0.001640 | 0.016877  | 0.157607 | 0.081810 | 0.996 | 2 |
| length[456] | 0.011204 | 0.000097 | 0.000012  | 0.029463 | 0.007819 | 1.012 | 2 |
| length[457] | 0.014391 | 0.000134 | 0.000481  | 0.040026 | 0.011070 | 0.995 | 2 |

+ Convergence diagnostic (PSRF = Potential Scale Reduction Factor; Gelman and Rubin, 1992) should approach 1.0 as runs converge. NA is reported when deviation of parameter values within all runs is 0 or when a parameter value (a branch length, for instance) is not sampled in all runs.

Summary statistics for partitions with frequency >= 0.10 in at least one run:

Average standard deviation of split frequencies = 0.014065  
Maximum standard deviation of split frequencies = 0.079143  
Average PSRF for parameter values ( excluding NA and >10.0 ) = 1.002  
Maximum PSRF for parameter values = 1.084

Clade credibility values:  
Subtree rooted at node 232:

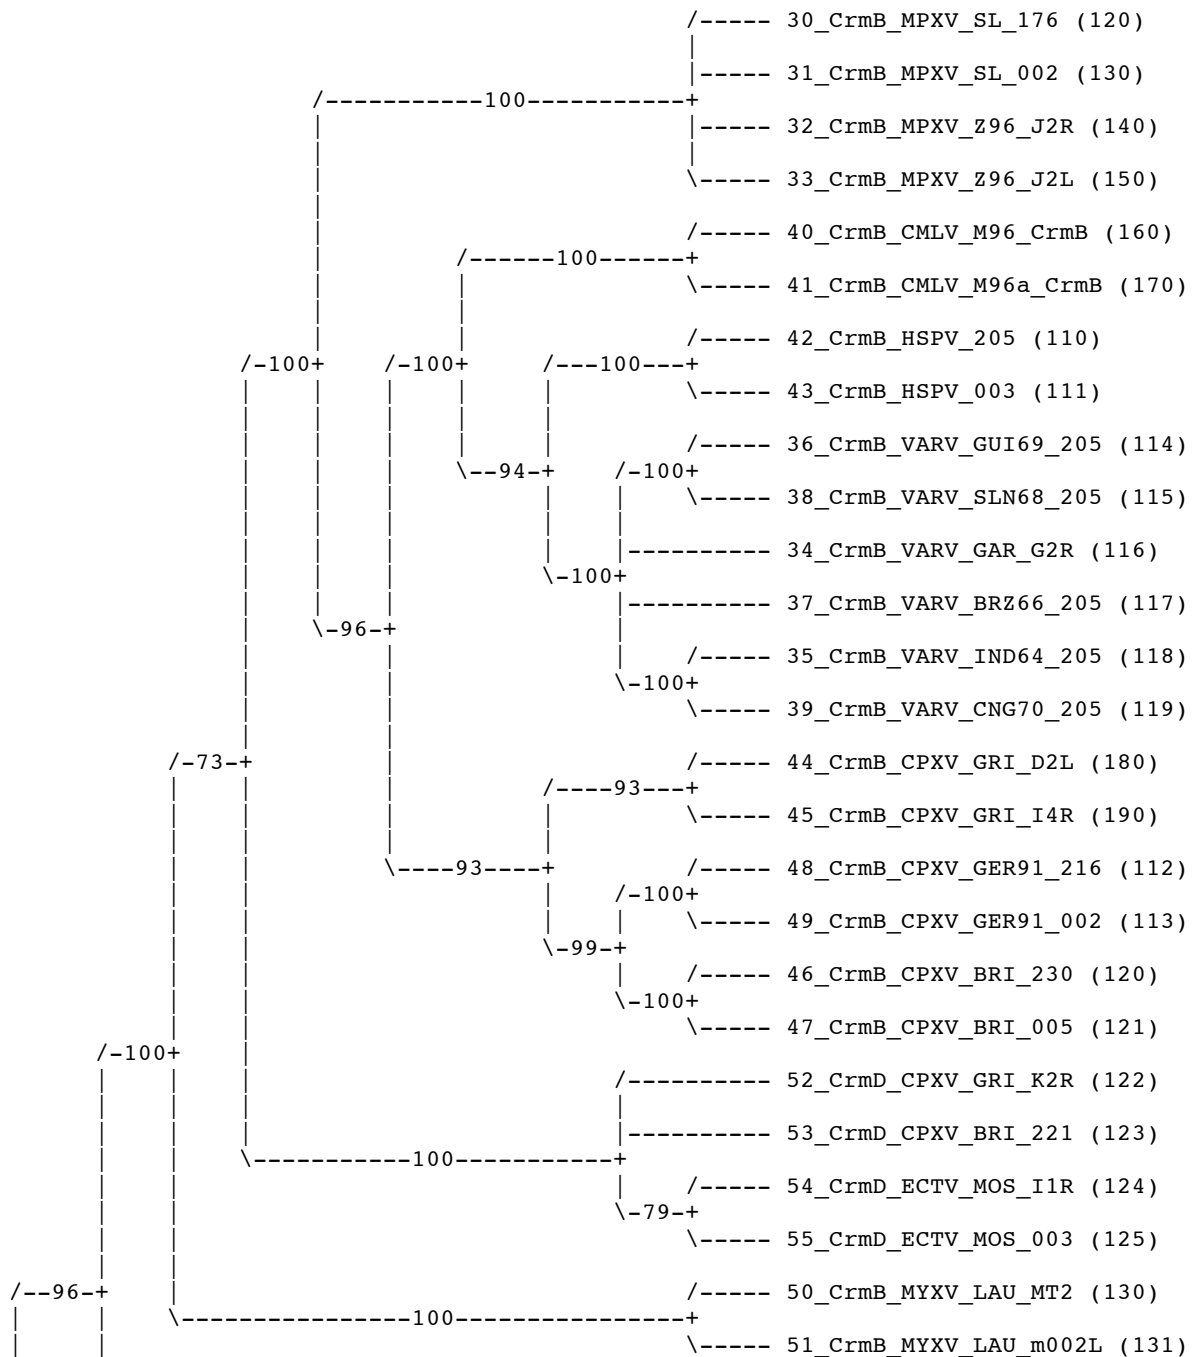



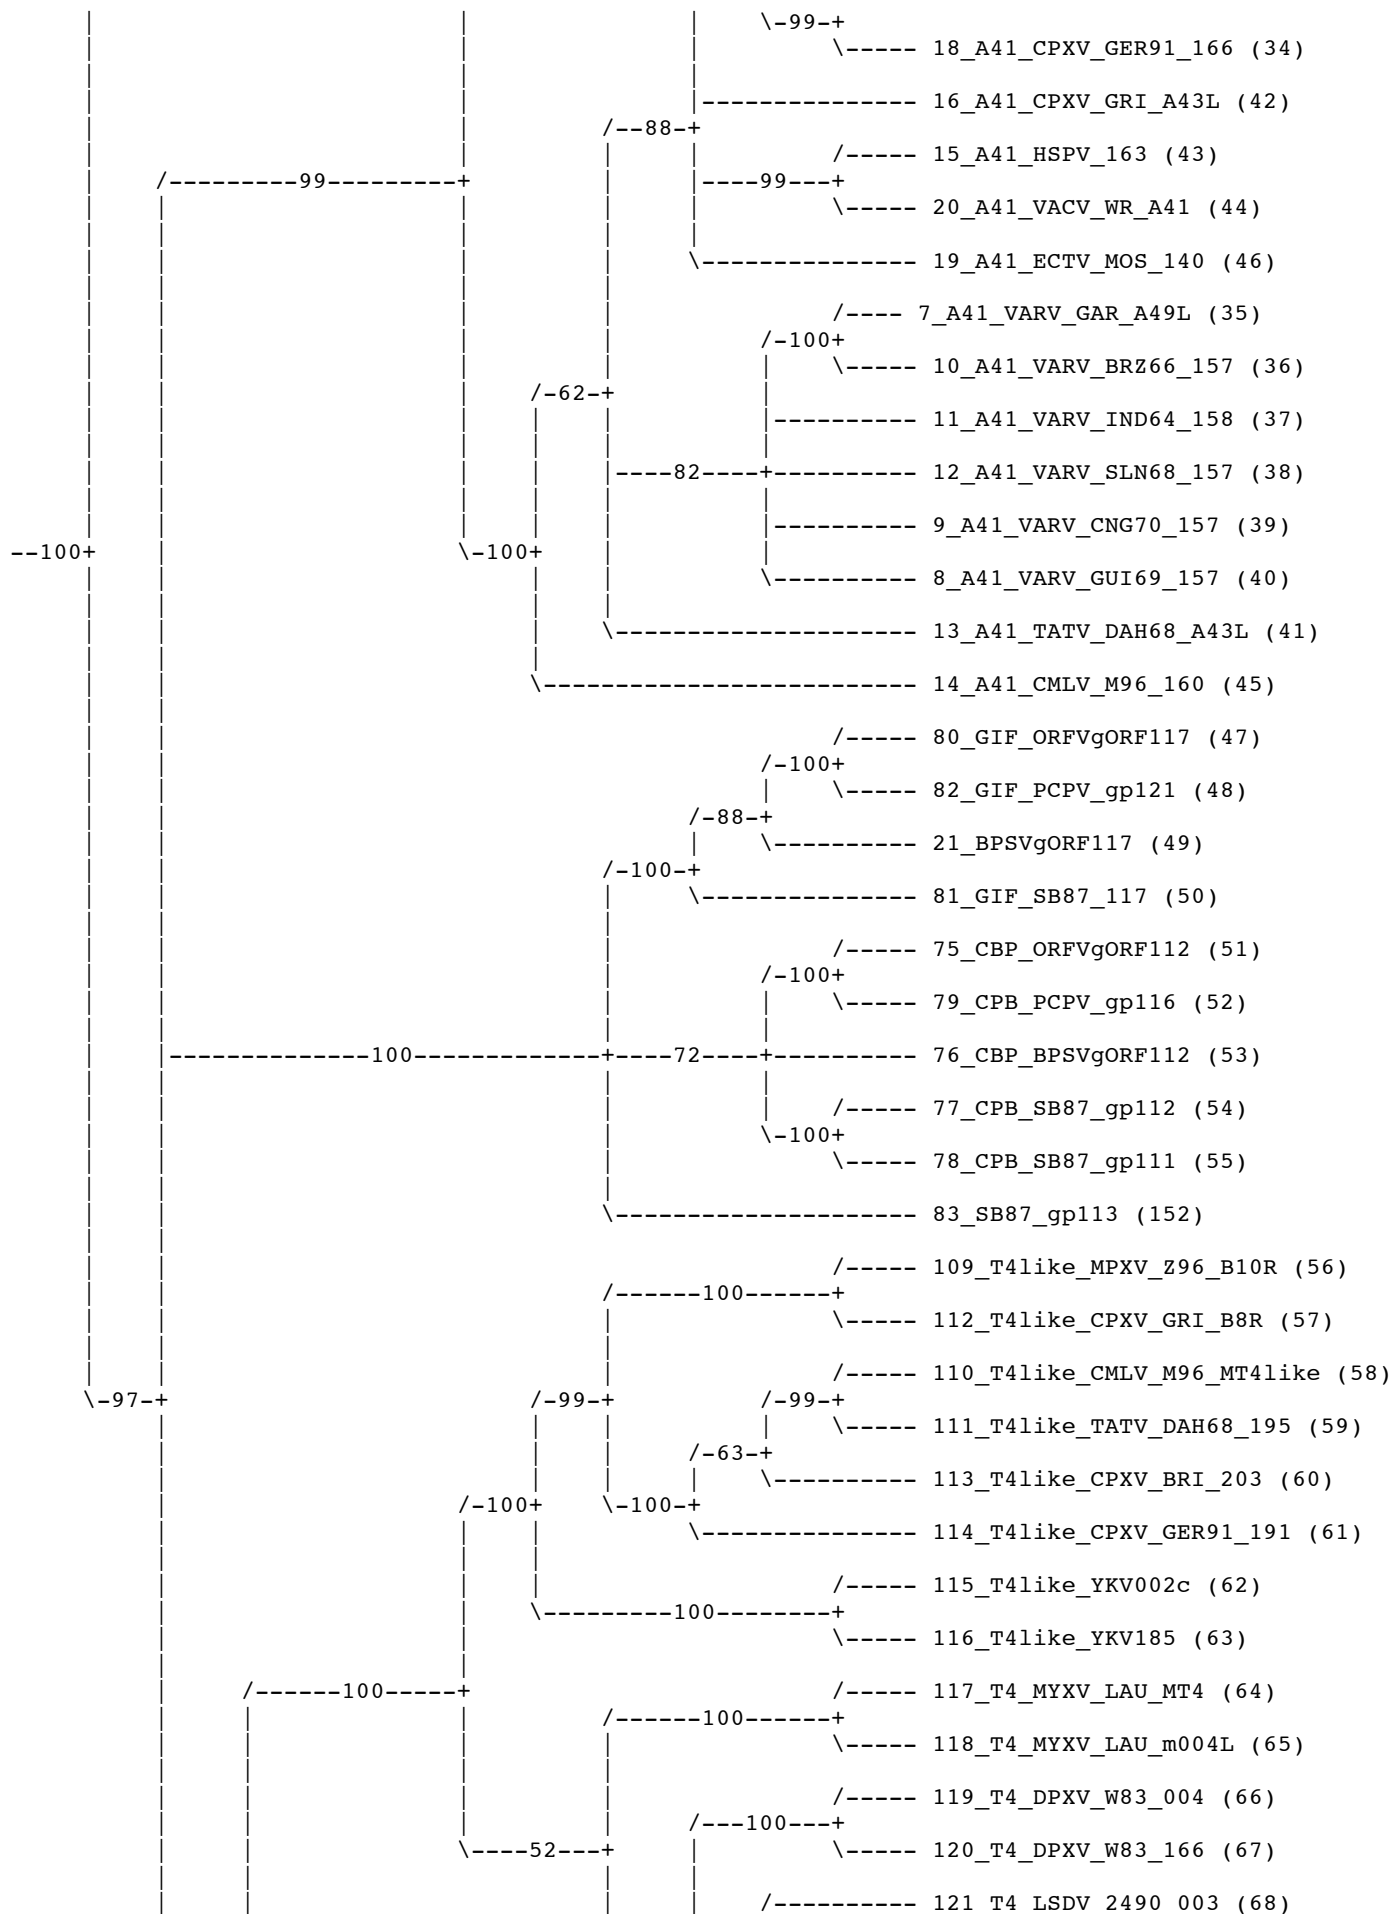

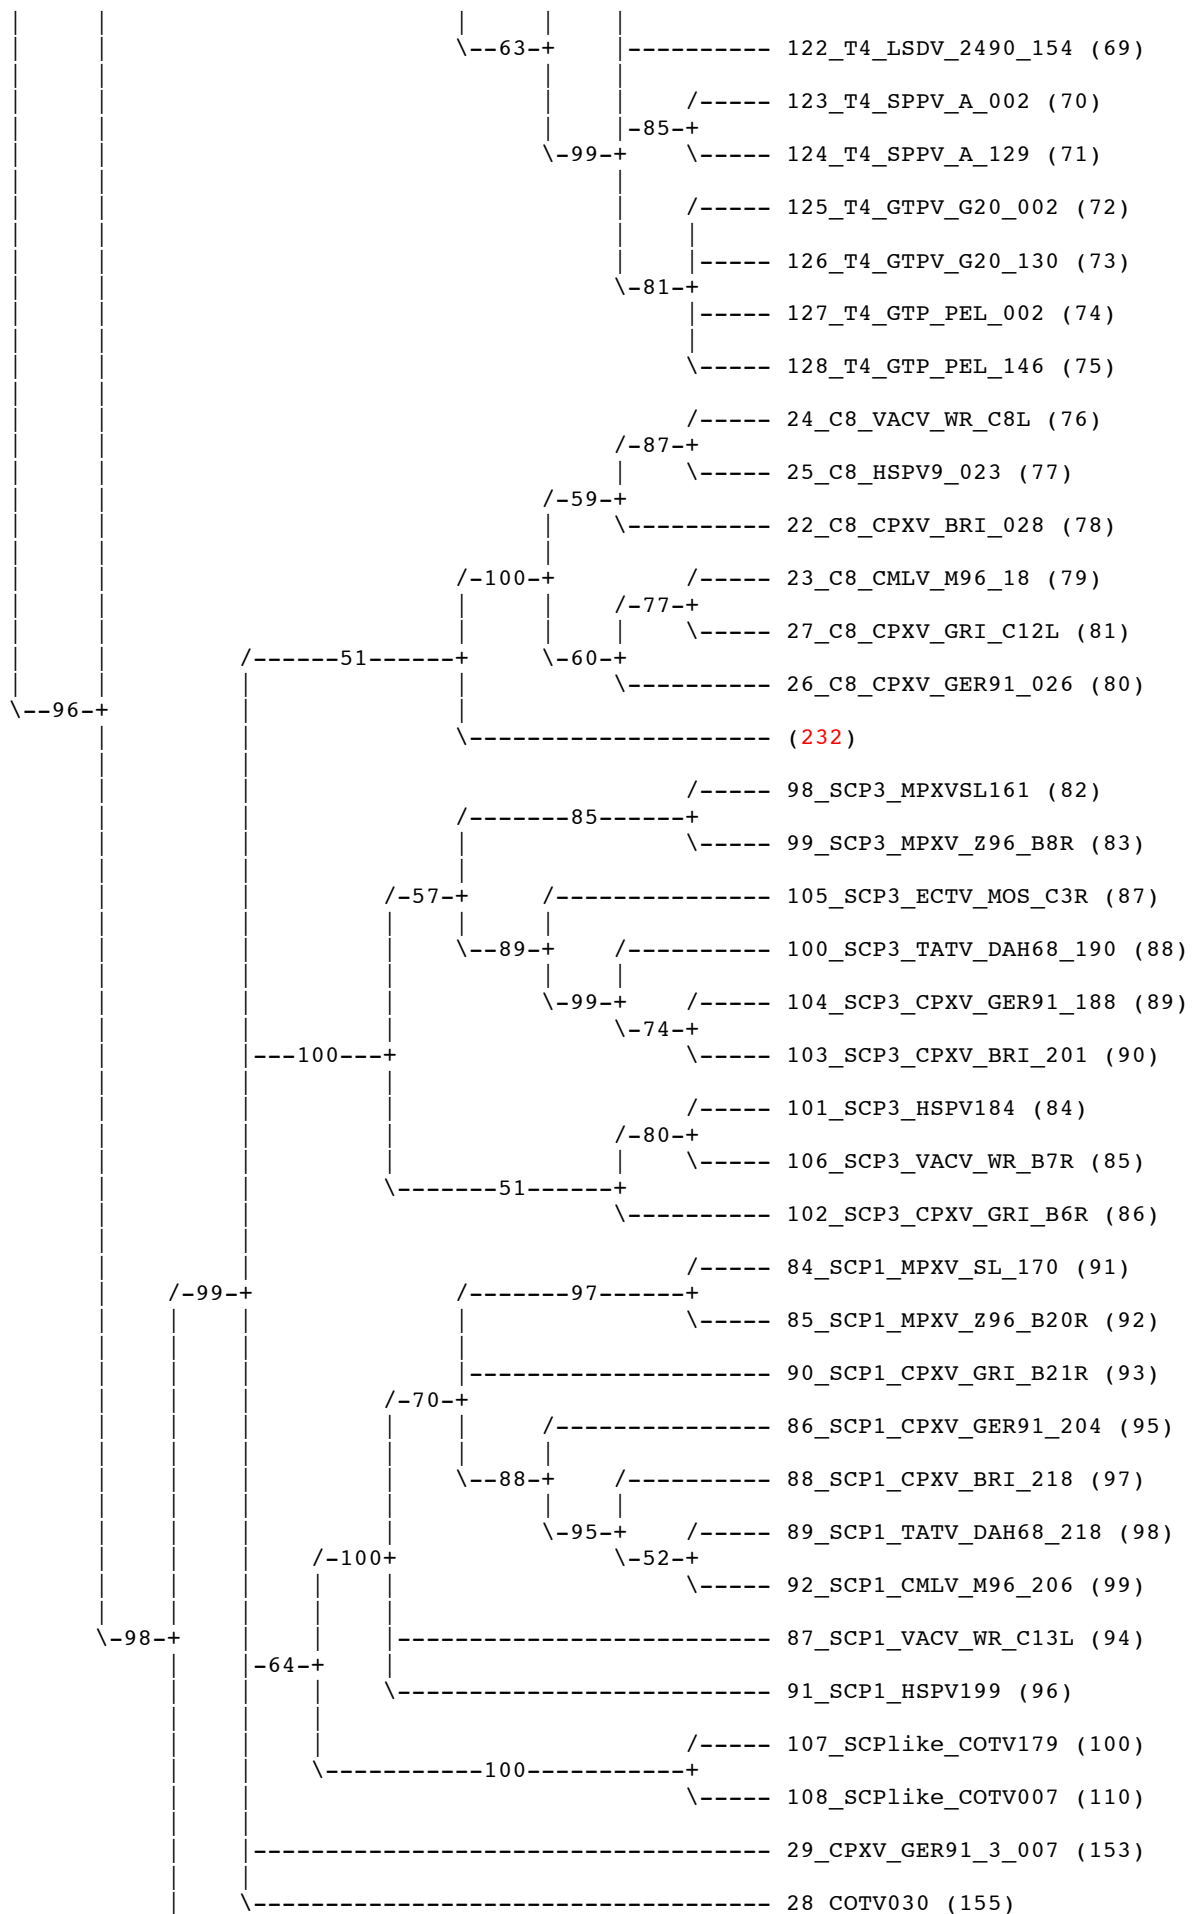

```

|
\-----99-----+
                    /----- (264)
                    \----- 57_M2like_YKV175 (154)

```

Root part of tree:

```

/----- 139_vCCI_VARV_GAR_G3R (1)
|----- 140_vCCI_VARV_CNG70_206 (2)
|----- 129_vCCI_VARV_BRZ66_206 (3)
|----- 156_vCCI_VARV_IND64_206 (6)
|-----100-----+
                    /----- 130_vCCI_VARV_SLN68_206 (4)
                    \----- 155_vCCI_VARV_GUI69_206 (5)
+-----100-----+
                    /----- 143_vCCI_CMLV_M96_211 (7)
                    \----- 144_vCCI_CMLV_M96_1 (8)
|-----100-----+
                    /----- 133_vCCI_CPXV_GRI_D1L (9)
                    \----- 141_vCCI_CPXV_GRI_I5R (10)
|-----86-----+
                    /----- 134_vCCI_VACV_WR_B29R (11)
                    \----- 135_vCCI_VACV_WR_C23L (12)
|-----98-----+
                    \----- 142_vCCI_RPXV_Utrecht_35kDa (13)
|-----100-----+
                    /----- 131_vCCI_ECTV_MOS_K2R (15)
                    \----- 132_vCCI_ECTV_MOS_001 (16)
|-----67-----+
                    /----- 149_vCCI_CPXV_BRI_003 (17)
                    \----- 152_vCCI_CPXV_BRI_227 (18)
|-----100-----+
                    /----- 153_vCCI_CPXV_GER91_001 (19)
                    \----- 154_vCCI_CPXV_GER91_217 (20)
|-----59-----+
                    /----- 137_vCCI_HSPV002 (21)
                    \----- 138_vCCI_HSPV206 (22)
|-----100-----+
                    /----- 150_vCCI_MPXV_Z96_J3R (23)
                    \----- 151_vCCI_MPXVSL_001 (24)
|-----100-----+
                    /----- 147_vCCI_MPXVSL_177 (25)
                    \----- 148_vCCI_MPXV_Z96_J1L (26)
|-----100-----+
                    /----- (269)
                    \----- 136_vCCI_VACV_Lister_vCCI (14)

```



```

/ 139_vCCI_VARV_GAR_G3R (1)
140_vCCI_VARV_CNG70_206 (2)
129_vCCI_VARV_BRZ66_206 (3)
156_vCCI_VARV_IND64_206 (6)
130_vCCI_VARV_SLN68_206 (4)
155_vCCI_VARV_GUI69_206 (5)
/ 143_vCCI_CMLV_M96_211 (7)
144_vCCI_CMLV_M96_1 (8)
133_vCCI_CPXV_GRI_D1L (9)
141_vCCI_CPXV_GRI_I5R (10)
134_vCCI_VACV_WR_B29R (11)
135_vCCI_VACV_WR_C23L (12)
142_vCCI_RPXV_Utrecht_35kDa (13)
/ 131_vCCI_ECTV_MOS_K2R (15)
/+
|\ 132_vCCI_ECTV_MOS_001 (16)
/ 149_vCCI_CPXV_BRI_003 (17)
/+
|\ 152_vCCI_CPXV_BRI_227 (18)
+
|/ 153_vCCI_CPXV_GER91_001 (19)
\+
\ 154_vCCI_CPXV_GER91_217 (20)
/ 137_vCCI_HSPV002 (21)
/+
|\ 138_vCCI_HSPV206 (22)
+ / 150_vCCI_MPXV_Z96_J3R (23)
|
| 151_vCCI_MPXVSL_001 (24)
\+
| 147_vCCI_MPXVSL_177 (25)
+
\ 148_vCCI_MPXV_Z96_J1L (26)
/ 145_vCCI_MYXV_LAU_MT1 (27)
/-----+
| \ 146_vCCI_MYXV_LAU_m001L (28)

```

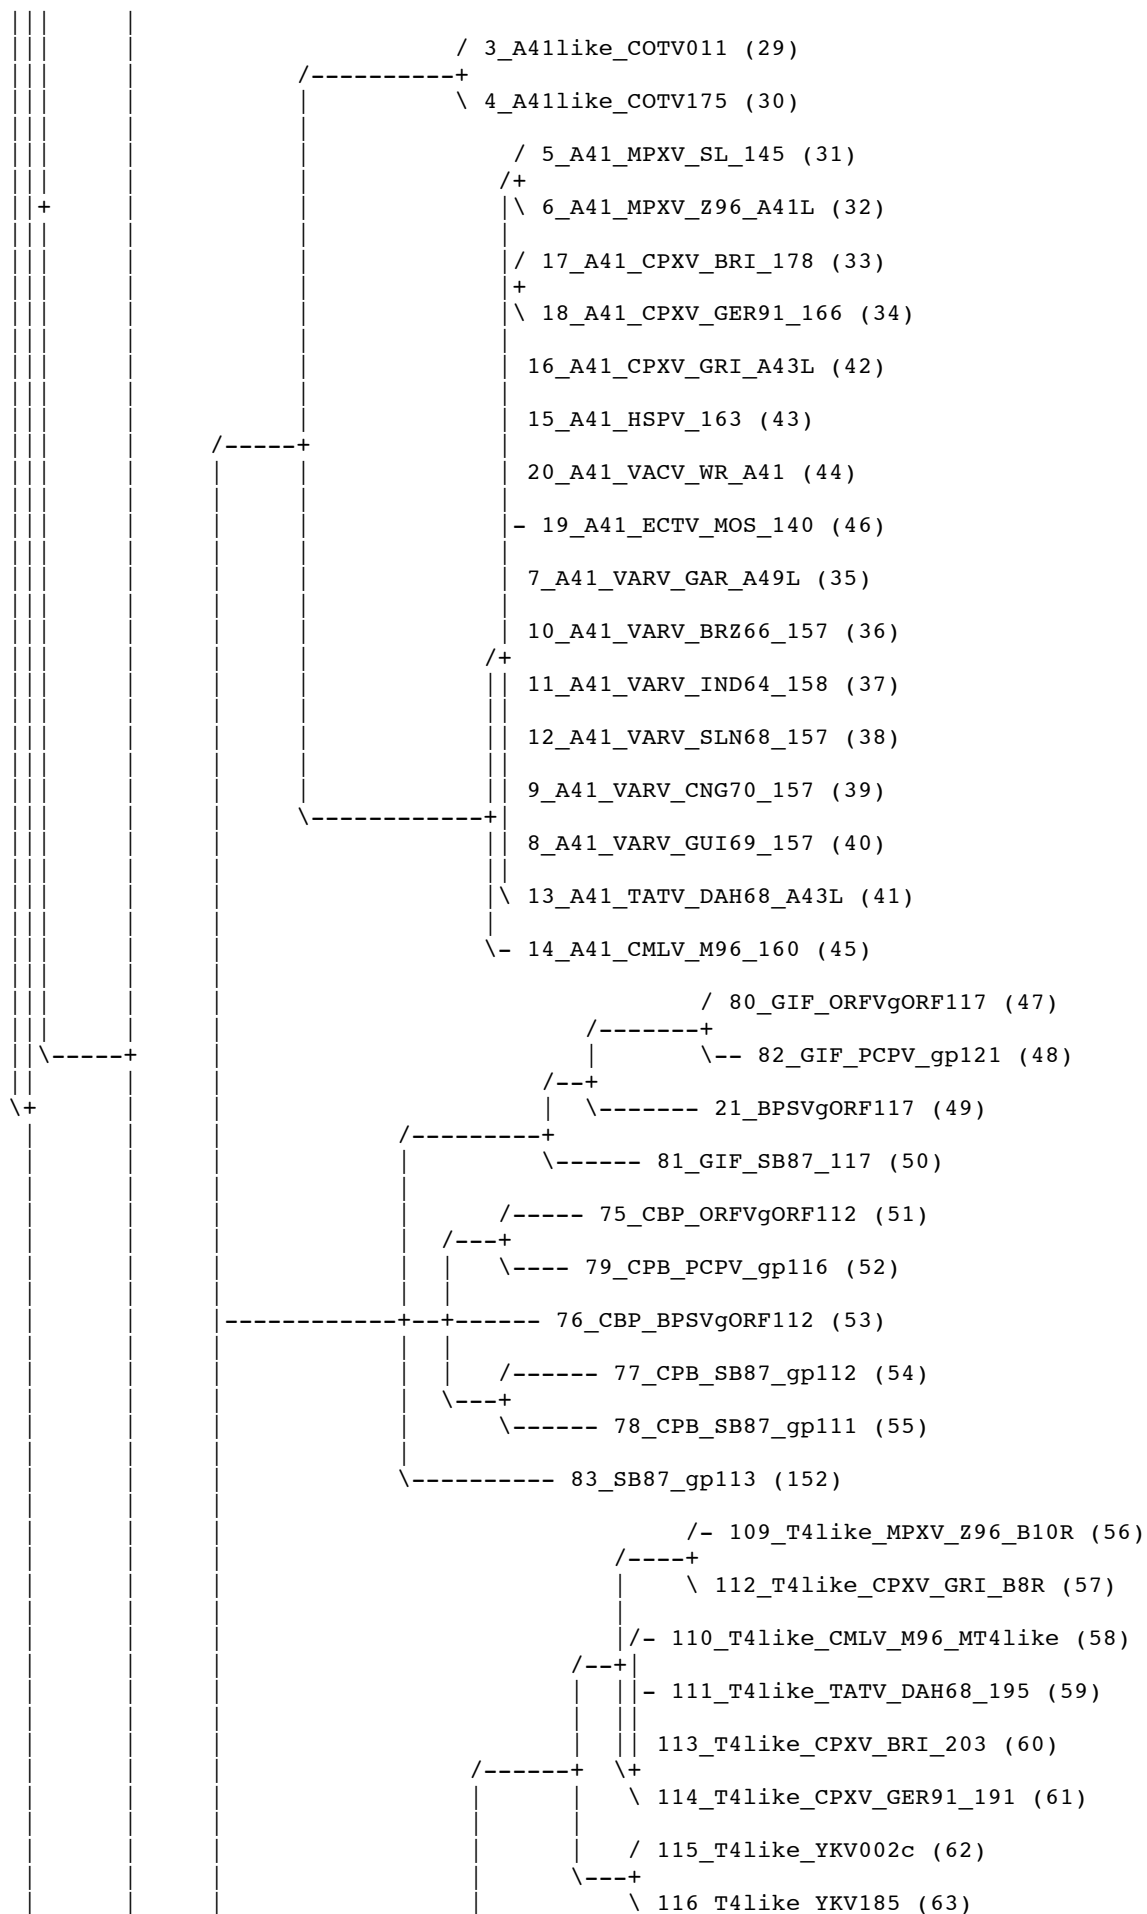

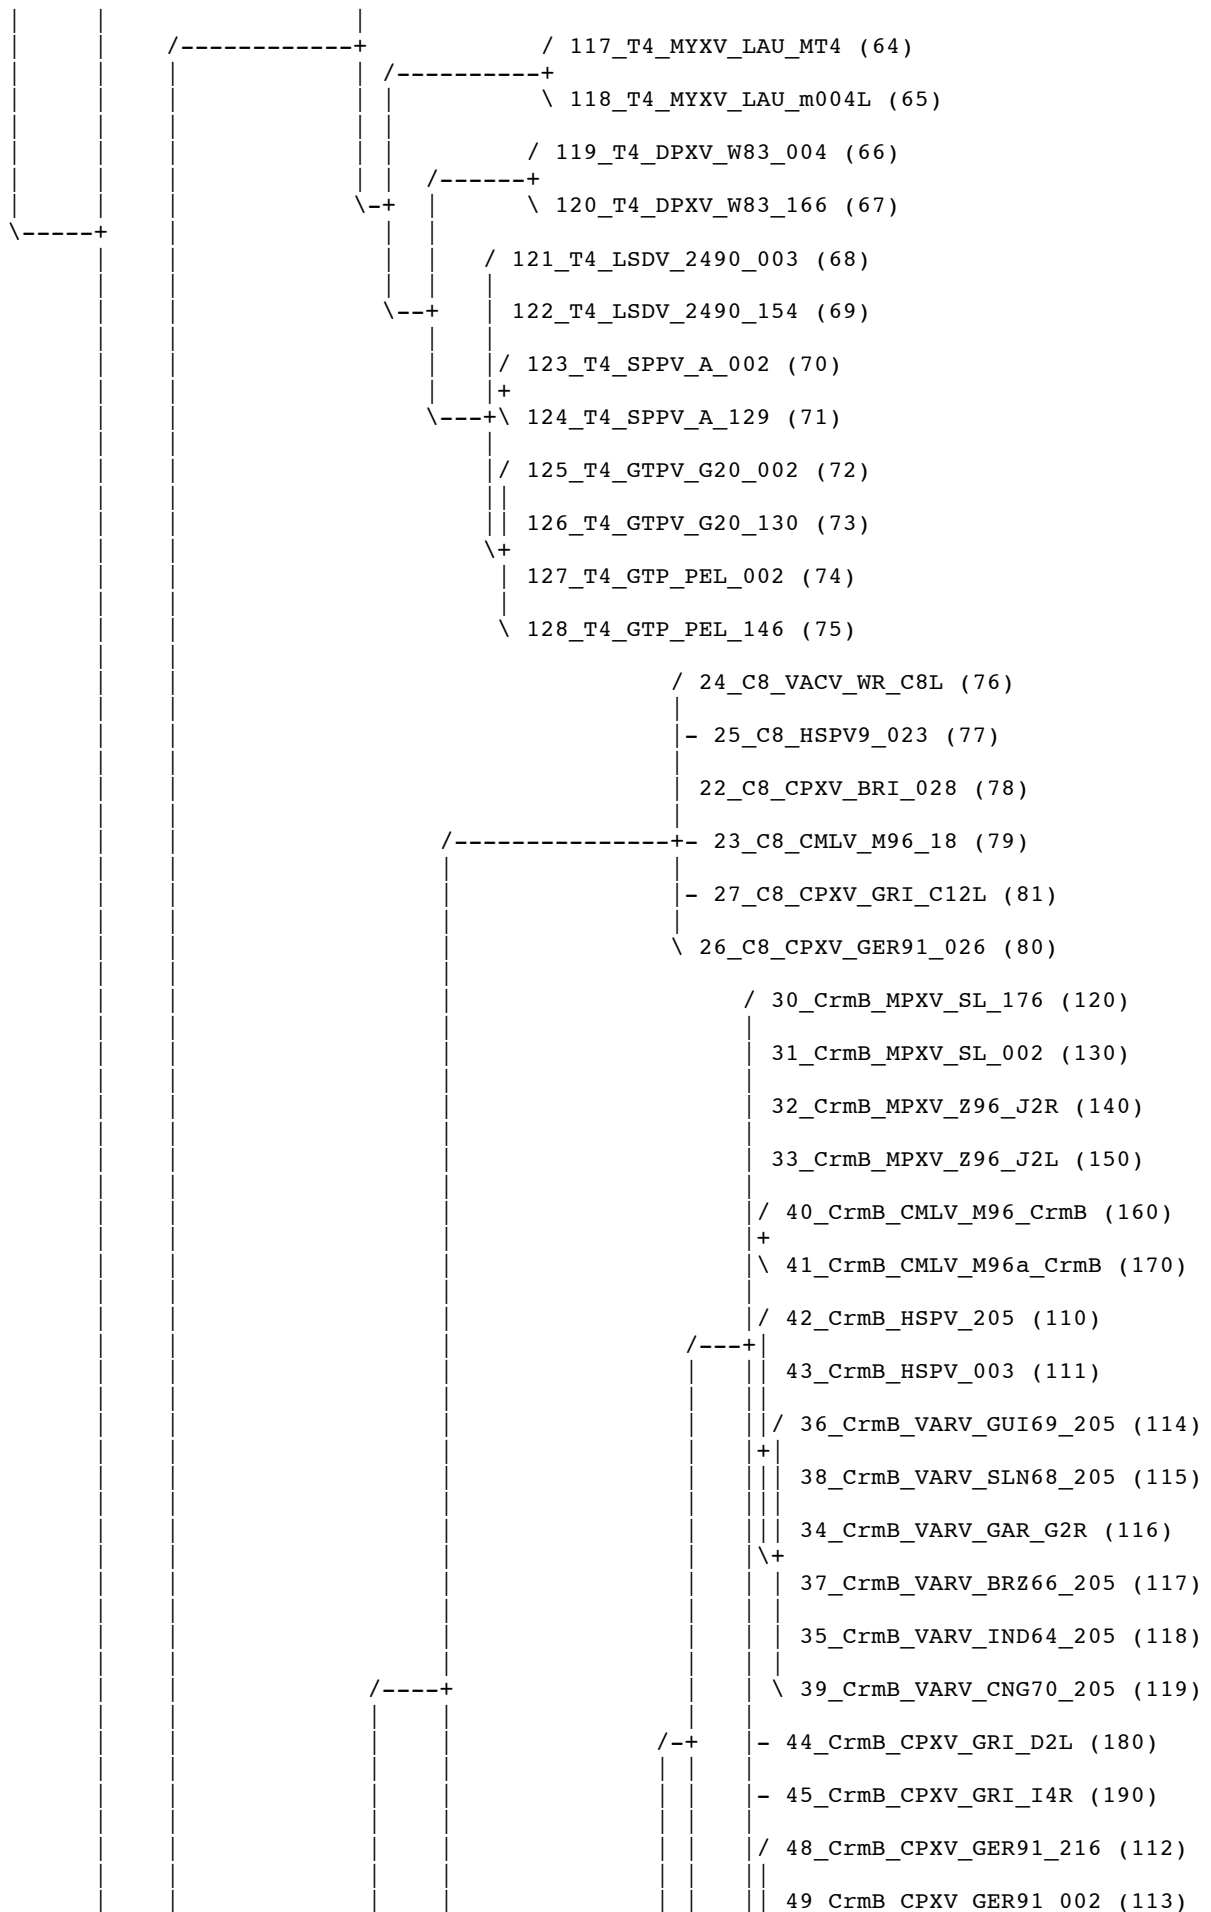

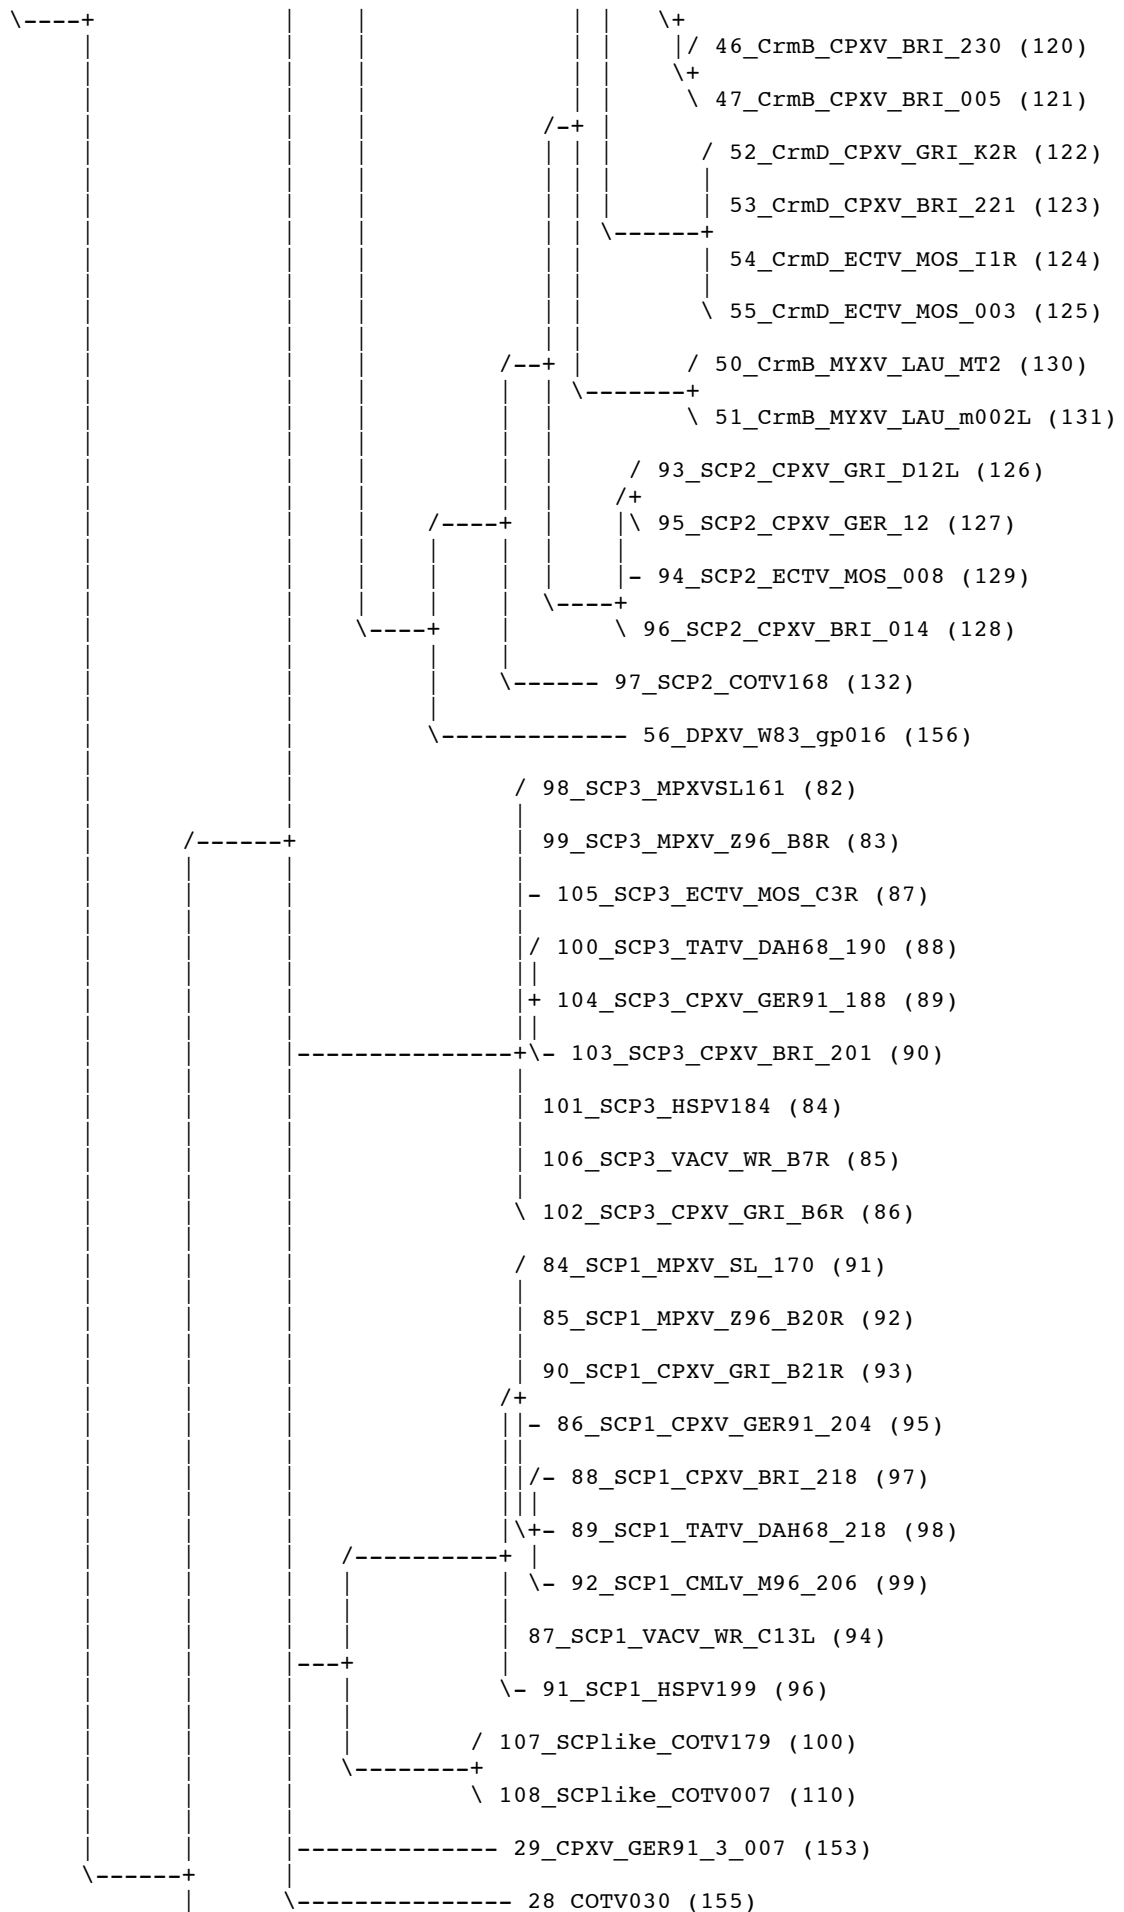

```

/ 1_M2_CPXV_BRI_040 (133)
|
| 2_M2_CPXV_GER91_038 (134)
|
| 61_M2_VARV_IND64_022 (135)
|
| /-+ 64_M2_VARV_CNG70_022 (136)
|
| + 63_M2_VARV_SLN68_22 (137)
|
| 71_M2_VARV_GUI69_22 (138)
|
| 69_M2_VARV_BRZ66_26 (139)
|
| \ 70_M2_VARV_GAR_Q2L (140)
|
| - 65_M2_TATV_DAH68_033 (141)
|
| /+
|
| - 62_M2_CMLV_M96_029 (142)
|
| / 66_M2_MPXVSL21 (143)
|
| +
|
| \ 67_M2_MPXV_Z96_O2L (144)
|
| /--+
|
| 68_M2_HSPV_034 (145)
|
| \ 72_M2_VACV_WR_M2L (146)
|
| /-----+
|
| \----- 60_M2_COTV028 (147)
|
| \----- 73_M2_YKV_170 (148)
|
| /-----+
|
| \----- 74_M2_MYXV_LAU_m154L (149)
|
| /-----+
|
| \----- 58_M2like_YMTV_YLD_9L (150)
|
| \----- 59_M2like_DPXV_W83_17 (151)
|
| \----- 57_M2like_YKV175 (154)
|
\ 136_vCCI_VACV_Lister_vCCI (14)

```

|-----| 1.000 expected changes per site

Calculating tree probabilities...

Credible sets of trees (3002 trees sampled):

```

50 % credible set contains 1501 trees
90 % credible set contains 2702 trees
95 % credible set contains 2852 trees
99 % credible set contains 2972 trees

```

MrBayes > quit
