# Supplementary material for: Structural Conservation and Functional Diversity of the Poxvirus Immune Evasion (PIE) Domain Superfamily
Source: MDPI journal article supplement (doi:10.3390/v7092848), 2015-08-28
Supplement: s1 [file s1]

## ORF-GIF Family Alignment

|                 |                                                                      |     |
|-----------------|----------------------------------------------------------------------|-----|
| GIF_ORFVgORF117 | MA[C]..LRVFLAVFAL[CGS]...VHSAQWIGERDF[CM]AHAQDVFARLQVWMRIDR          | 48  |
| GIF_SB87_gp117  | MAADGLRLLLALAAVLGGGPARARAHKGFHGGGE.DF[C]RAHERDIYPSLQIWVRVDR          | 55  |
| GIF_PCPV_gp121  | MA[C]..LRVFLAVLAL[CGS]...VHSTPWIGERDF[CA]AHAQDVFSRLOQVWIRIDR         | 48  |
| GIF_ORFVgORF117 | [NVT]AAD[NNS]A[CG]ALAIETPPSNFDADVYVAAAGI[NVS]VSAIN[CG]FFSNMRQVETTYDT | 104 |
| GIF_SB87_gp117  | DPGVARNAST[CT]LNVEAHPSGFDAAHAYVAAAGV[NVSLATKHFGKFSMLRRTTFSP          | 111 |
| GIF_PCPV_gp121  | [NVT]TAD[NNS]A[CG]ALAIETPPSNFDADVYVAAAGI[NVS]VSAIN[CG]FFSNMRQVEATYDT | 104 |
| GIF_ORFVgORF117 | ARRQMYYVMDTWDPWVLDDPQPLFS..QEYE[NET]LP.YLLEVLLELARLYIRVG[CTV         | 157 |
| GIF_SB87_gp117  | EKDKIYVYLDWSWPWTR..SVDPLFR[NCS]GADN[CT]DPNLLLEVLLETARLSVEVG[CSA      | 166 |
| GIF_PCPV_gp121  | ARRQMYYVYTDTWDPWVLDPNPQPIFS..QEYE[NDT]LP.YLLEVLLEFSRMYIRVG[CTV       | 157 |
| GIF_ORFVgORF117 | PGEQPFVEVITGIDYPHTSMFELQHVLRPNRRFAPAKLHMDLEVDYR[CV]SAVYVKAF          | 213 |
| GIF_SB87_gp117  | PGFRPDLADP..LETHADPDLLTLTDTHDRKRDPGAVEVDLRVDER[CV]RSAYVKVV           | 220 |
| GIF_PCPV_gp121  | PGEQPFVEVIGIDYPHHSMEFLQLQHVQRPNRRFSPAKLHIDLEVDYR[CV]SAHVKAFA         | 213 |
| GIF_ORFVgORF117 | LQDA[C]S..ARKAR..TPLYFAGHGSNHPDRRPKNPVP RPQHVSSPMSRK[CL]MQTAR        | 265 |
| GIF_SB87_gp117  | LRDA[C]FQQAMHHRQRPRRRLPRQSRRLQQLKLPQPPQHQS[CR]NERRKIQ...             | 272 |
| GIF_PCPV_gp121  | LQDA[C]S..ARKAR..TPLYFAGHGSNHPDRRPKNPVP RPQQVWSSSSRK[CL]RMQTVR       | 265 |

**Figure S13.** Sequence alignment of the ORF-GIF family members. Cysteine residues are boxed in yellow. Predicted N-linked glycosylation sites are boxed in blue.

## Orphan Alignment

|                  |                                                                                                           |     |
|------------------|-----------------------------------------------------------------------------------------------------------|-----|
| COTV030          | MNSLKLIIIFILYVSTIYSFNYSNV[NITI]EINDVNSDYNIK[NY]TLNLIY                                                     | 50  |
| CPXV_GER91_007_  | MGRSIIIFLALIG[CA]ISNYVTPKQPTDNQFNNVEITFFMTPNIEGKYTTY                                                      | 50  |
| SCPlike_COTV007  | MIIMKHIIILFINFVSFVYSEKFNKVDINLYIFSL[NNT]DYDIYTLSDNQYK                                                     | 50  |
| SCPlike_COTV179  | MIIMKHIIILFINFVSFVYSEKFNKVDINLYIFSL[NNT]DYDIYTLSDNQYK                                                     | 50  |
| A41-like_COTV011 | MNTHLLLLLVGVISS[CY]YAG..NKNWVKPELVSI FSDTENPLTKVFKV[CD]TE                                                 | 49  |
| A41-like_COTV175 | MNTHLLLLLVGVISS[CY]YAG..NKNWVKPELVSI FSDTENPLTKVFKV[CD]TE                                                 | 49  |
| SB87_gp113       | MKTLLLAAVIISLANSLP LLLSNKDAF[CS]STKEEIHQIMIAMRI[NRT]VV                                                    | 50  |
| DPXV_-016        | MIKYTLTTSFIFFIT[CY]YHVSXVSNEEIQNKFTMFVDLTVYDKNLINDVS[CG]                                                  | 50  |
| BPSVgORF117      | MWLPRALLALSVI[CG]TASSYRGMHDGGEF[CR]AHSREIFTSFQMWMRIQRN                                                    | 50  |
| COTV030          | KIITQDFTIELTKRSKQRFIYTDYVNIINNTGIATFYTDIGNRFSYRGSYS                                                       | 100 |
| CPXV_GER91_007_  | SHRRFHAVNSDKWIVGITA INLDLPNK[NITI]LTQLVPS[NATI]IVKFTFGSND                                                 | 100 |
| SCPlike_COTV007  | V[NITI]EVSIIYITAYDIPLEFKNVYIEQIQDLSVINLSTDTGIFQTG[NKSI]I                                                  | 100 |
| SCPlike_COTV179  | V[NITI]EVSIIYITAYDIPLEFKNVYIEQIQDLSVINLSTDTGIFQTG[NKSI]I                                                  | 100 |
| A41-like_COTV011 | NVFMGMYLNI FAKVNKYTPR[CT]SLDIKKDNAYVVGGVV I[NNT]LQD[CP]FP                                                 | 99  |
| A41-like_COTV175 | NVFMGMYLNI FAKVNKYTPR[CT]SLDIKKDNAYVVGGVV I[NNT]LQD[CP]FP                                                 | 99  |
| SB87_gp113       | SEP KTY[CE]LDMQDDLLLEGT FMDSTAYFEANGV[NATI]VSIMGEGIDMTLSSL                                                | 100 |
| DPXV_-016        | KRYDHDNFYSMYI IDNF[NVS]ITLSD[CG]DAGFTEGYVTNVRNNTMELGYFT                                                   | 100 |
| BPSVgORF117      | VQTAR[NATI]Q[CA]LDVEAPPDMSITDVLVAYANTAGI AVTVATANVGRVDVRTLQ                                               | 100 |
| COTV030          | I E L T [C] E S I F N I Y G D Y L Y [C] D N T N T [N Y T] N N K I K N F F T I Y G S [C] V K K A K I K F V | 150 |
| CPXV_GER91_007_  | I F Q T K K V K F I I G I T [C] K E T T A K T L R S L N L R M S S L D K H F T E Y I N T N H V S Y Y G     | 150 |
| SCPlike_COTV007  | Y L D I D [C] N N K N I S D N K K M L K G I W N I N I F K R Y M D F V Y I H G S [C] I D R V N A R I R Y   | 150 |
| SCPlike_COTV179  | Y L D I D [C] N N K N I S D N K K M L K G I W N I N I F K R Y M D F V Y I H G S [C] I D R V N A R I R Y   | 150 |
| A41-like_COTV011 | V S T V A E E V Y D D S I L N V I F S T V N P I T D K D K T N F I T K D E S K N I P K K [C] K V F V S     | 149 |
| A41-like_COTV175 | V S T V A E E V Y D D S I L N V I F S T V N P I T D K D K T N F I T K D E S K N I P K K [C] K V F V S     | 149 |
| SB87_gp113       | R V E Y T P T T D A E I M Y A F I S S W A P W V K N N K D L A L N N R E E L A [NFT] N K L N I A L K       | 150 |
| DPXV_-016        | P I I M K Y K G L N F D S R [C] I V R I I I T [C] D G D N N L V M T P Q R F K P K K Q K H A D H I E K     | 150 |
| BPSVgORF117      | V L Y S T [NKS] S M F V Y L D T W S P W T K Y T R P L Y S [NAS] A D A H [NET] I D [C] L L E V L D L N     | 150 |
| COTV030          | Y L N T L T K K I L L I I Y I L E T A L L F N Q K V K K I K Y H K F V Y K M D A D Y I F . . . . .         | 195 |
| CPXV_GER91_007_  | N [C] F N Y L S V D I N Y K N T E T I G V Y D F Y Y S T N S A Q Y V D K G S I V K I . . . . .             | 191 |
| SCPlike_COTV007  | S N T K S R L F E S S Y F T N N F . . . . .                                                               | 167 |
| SCPlike_COTV179  | S N T K S R L F E S S Y F T N N F . . . . .                                                               | 167 |
| A41-like_COTV011 | M K [C] K Q D E H F S E E S F D E H E Y D D D Y E E A V P I N V D N E I L A T F N R N K A P I K V N D     | 199 |
| A41-like_COTV175 | M K [C] K Q D E H F S E E S F D E H E Y D D D Y E E A V P I N V D N E I L A T F N R N K A P I K V N D     | 199 |
| SB87_gp113       | V D [C] D H Q K F P V P T T E A P T P T T E S P T T T I S V T E T R [NET] T P S V D E E D D E             | 200 |
| DPXV_-016        | L I L Y G K [C] I D G I K A D V T Y D Y G S V R D T S S I I Y G T I S D I S G L L P N T [C] P K . . . .   | 196 |
| BPSVgORF117      | K V H V D V G [C] A V E D I P V D V V D P I D Y P R V Y D P D L L R Y V I P K N R K Q N P G Y V F V D     | 200 |
| COTV030          | . . . . .                                                                                                 | 195 |
| CPXV_GER91_007_  | . . . . .                                                                                                 | 191 |
| SCPlike_COTV007  | . . . . .                                                                                                 | 167 |
| SCPlike_COTV179  | . . . . .                                                                                                 | 167 |
| A41-like_COTV011 | I L T L D I D K S [C] V Q E V V S R L R I N D L [C] E S V K R Y P E S S Y V Q E V S Y P E S S K F E D F   | 249 |
| A41-like_COTV175 | I L T L D I D K S [C] V Q E V V S R L R I N D L [C] E S V K R Y P E S S Y V Q E V S Y P E S S K F E D F   | 249 |
| SB87_gp113       | E P P V D V H T N R K H E P M D I S F S T M I N Q Q [C] I Q D L A V R V V I R D A [C] E Y R K T E T P L   | 250 |
| DPXV_-016        | . . . . .                                                                                                 | 196 |
| BPSVgORF117      | L S V D S Y [C] V H S V N V K T V L R D A [C] I H H K N E T P L N F Y G R E N F P L H K S P N S V I P T   | 250 |
| COTV030          | . . . . .                                                                                                 | 195 |
| CPXV_GER91_007_  | . . . . .                                                                                                 | 191 |
| SCPlike_COTV007  | . . . . .                                                                                                 | 167 |
| SCPlike_COTV179  | . . . . .                                                                                                 | 167 |
| A41-like_COTV011 | E K N T P G Y P T L [C] . . . . .                                                                         | 260 |
| A41-like_COTV175 | E K N T P G Y P T L [C] . . . . .                                                                         | 260 |
| SB87_gp113       | G M L G T H G N D F R Q E L K K M K T K R T [C] S M H L K N E E T V D E E V S E L S E                     | 292 |
| DPXV_-016        | . . . . .                                                                                                 | 196 |
| BPSVgORF117      | H K R G F S T [C] E M I T G Q . . . . .                                                                   | 264 |

**Figure S14.** Sequences of orphan PIE domains. Cysteine residues are boxed in yellow. Predicted N-linked glycosylation sites are boxed in blue.
