# Supplementary material for: Structural Conservation and Functional Diversity of the Poxvirus Immune Evasion (PIE) Domain Superfamily
Source: MDPI journal article supplement (doi:10.3390/v7092848), 2015-08-28
Supplement: s1 [file s1]

# ORF-CBP Family Alignment

|                    |                                           |     |                                                     |     |
|--------------------|-------------------------------------------|-----|-----------------------------------------------------|-----|
| <i>BPSVgORF112</i> | .MKSTYLLFALS LVL SAA LSAPMN. . . .TDEQRNW | C   | RIHKDKLYSRFRLYMK ITR                                | 50  |
| <i>ORFVgORF112</i> | .MKVVL L LVL LGAFTNAAPLVGNQ. RLDSEEKANF   | C   | STHQNEVYARFR LQMRVG V                               | 53  |
| <i>SB87_gp112</i>  | . .MKRFIFAA L                             | C   | LLSSVQPAPVVTY. . .TSEKENF                           | 51  |
| <i>SB87_gp111</i>  | .MR                                       | C   | LILTAVLAAALALIGAAPSS. . . .PEKKEF                   | 49  |
| <i>PCPV_gp116</i>  | MRA FV L L LALVGAFAHA VPMREHYGNPDSAEKQKF  | C   | LTHNTEMYAKFR LYMRIQV                                | 55  |
| <i>BPSVgORF112</i> | . .TTVTPTPTGM                             | C   | MLDIENSNDLDETDEVT                                   | 103 |
| <i>ORFVgORF112</i> | RHSPLYTPSNM                               | C   | MMDIEDS IMDIE                                       | 100 |
| <i>SB87_gp112</i>  | . .NLYSSVKAQ                              | C   | TLDIETEFESLD. . . .SSSAYVDASGI                      | 90  |
| <i>SB87_gp111</i>  | . .TLHSEVSSQ                              | C   | VLDIQN                                              | 88  |
| <i>PCPV_gp116</i>  | RHSPMYEPSNM                               | C   | MLDLET SRLD TD                                      | 96  |
| <i>BPSVgORF112</i> | LMGDEVH I PMSY IGVSFDPSSAY. .V FV         | NVS | SWTPWEKSTTDLAANDFEGLKNI I                           | 156 |
| <i>ORFVgORF112</i> | LIGEGVSIPLSY IGLGF                        | NPS | LADGYLYV                                            | 155 |
| <i>SB87_gp112</i>  | IMGENVY IPI NYVGIAYDLKDEN. .VYV           | NVS | SFRPW IQTTKNLAVDGNKGLEELL                           | 143 |
| <i>SB87_gp111</i>  | VFGDEVY IPLSYVSVAYDPTKMDGFVYV             | NVS | SFRPWEQYTK                                          | 143 |
| <i>PCPV_gp116</i>  | LIGEDVSI PFSY IGVGFNPLLSR. YVYV           | NVS | SWSPWDQLTAE LTSYDFWGLRQIL                           | 150 |
| <i>BPSVgORF112</i> | NHQILAI N L G                             | C   | DHQYPAPKPTPK. .PEKISTPST. TPGPTLLETEAPTTPVPVD T     | 208 |
| <i>ORFVgORF112</i> | EKELLAIQ I G                              | C   | DNQKFPEEPTTTQPPSPVTTT L SSTTLDLT DENTD T TPLTTTTS A | 210 |
| <i>SB87_gp112</i>  | KNVMVSI D I G                             | C   | DSQI I TPGPYPTPPPKVHTLSADEIEDLENS. . . .TPTTPDVT    | 194 |
| <i>SB87_gp111</i>  | QYGVVL I NVG                              | C   | DGQAI LTTAPPTTTPP. .STETTTIEHDYVYA. . . .SPTPPDTQ   | 192 |
| <i>PCPV_gp116</i>  | AKERLI IQLG                               | C   | DHQKFPEEPTPR TTPAQTTPEE. ELEEEDEY EYDE LKPTPPNI     | 204 |
| <i>BPSVgORF112</i> | SSDRKKKPD PVD FSL LVDTR                   | C   | IKNVDLYFELKDA                                       | 263 |
| <i>ORFVgORF112</i> | SVNRKRNPDDDFD FSL LVDPR                   | C   | VTSDVLHVELRDA                                       | 265 |
| <i>SB87_gp112</i>  | K. DRKRKPKDKLEFSL LRDP A                  | C   | IKNVEVYFELMDA                                       | 248 |
| <i>SB87_gp111</i>  | R. DRKKNPDSVT VIMDFDKT                    | C   | IKDVQVYFEIRDA                                       | 246 |
| <i>PCPV_gp116</i>  | YVDRKRNPGE LDFSL LADSR                    | C   | IESVDLYVELKDA                                       | 259 |
| <i>BPSVgORF112</i> | VRQDMKSLGTSYRT                            | C   | KLKTSSTADNDMESAKDEE                                 | 297 |
| <i>ORFVgORF112</i> | VKKEIKDV GKDHN M                          | C   | SLNLSPGH. . . . .                                   | 288 |
| <i>SB87_gp112</i>  | VRKEVKQLD. GKRR                           | C   | SMNLDSDYDDEELDP. . . .                              | 277 |
| <i>SB87_gp111</i>  | ILKEIKRLES GNRV                           | C   | SMHL DQDSGNETFDV. . . .                             | 276 |
| <i>PCPV_gp116</i>  | VRKEIKT LTDSHTI                           | C   | SMNMNPYDK. . . . .                                  | 283 |

**Figure S12.** Sequence alignment of the ORF-CBP family members. Cysteine residues are boxed in yellow. Predicted N-linked glycosylation sites are boxed in blue.
