# Supplementary material for: Structural Conservation and Functional Diversity of the Poxvirus Immune Evasion (PIE) Domain Superfamily
Source: MDPI journal article supplement (doi:10.3390/v7092848), 2015-08-28
Supplement: s1 [file s1]

[illegible]

**Figure S7.** Sequence alignment of the SCP-3 family members. Cysteine residues are boxed in yellow.

|                | 1 | 10 | 20 | 30 | 40 | 50 | 60 |   |   |   |   |   |   |   |   |   |   |   |   |   |   |   |   |   |   |   |   |   |   |   |   |   |   |   |   |   |   |   |   |   |   |   |   |   |   |   |   |   |   |   |   |   |   |   |   |   |   |   |   |   |   |   |   |    |
|----------------|---|----|----|----|----|----|----|---|---|---|---|---|---|---|---|---|---|---|---|---|---|---|---|---|---|---|---|---|---|---|---|---|---|---|---|---|---|---|---|---|---|---|---|---|---|---|---|---|---|---|---|---|---|---|---|---|---|---|---|---|---|---|---|----|
| MPXV-SL-161    | M | Y  | K  | K  | L  | I  | T  | F | L | V | I | G | A | V | A | S | Y | S | N | N | E | Y | T | P | F | N | K | L | S | V | K | L | Y | I | D | G | V | D | N | I | E | N | S | Y | T | D | D | N | N | E | L | V | L | N | F | K | E | Y | T | I | S | I | T | 65 |
| MPXV_Z96_B8R   | M | Y  | K  | K  | L  | I  | T  | F | L | V | I | G | A | V | A | S | Y | S | N | N | E | Y | T | P | F | N | K | L | S | V | K | L | Y | I | D | G | V | D | N | I | E | N | S | Y | T | D | D | N | N | E | L | V | L | N | F | K | E | Y | T | I | S | I | T | 65 |
| TATV_DAH68_190 | M | Y  | K  | K  | L  | I  | T  | F | L | V | I | G | A | I | A | S | Y | S | N | N | E | Y | T | P | F | N | K | L | S | V | K | L | Y | I | D | G | V | D | N | I | E | N | S | Y | T | D | D | N | N | E | L | V | L | N | F | K | E | Y | T | I | S | I | T | 64 |
| HSPV184        | M | Y  | K  | K  | L  | I  | T  | F | L | V | I | G | A | L | A | S | Y | S | N | N | E | Y | T | P | F | N | K | L | S | V | K | L | Y | I | D | G | V | D | N | I | E | N | S | Y | T | D | D | N | N | E | L | V | L | N | F | K | E | Y | T | I | S | I | T | 64 |
| CPXV_BRI_201   | M | Y  | K  | K  | L  | I  | T  | F | L | V | I | G | A | I | A | S | Y | S | N | N | E | Y | T | P | F | N | K | L | S | V | K | L | Y | I | D | G | V | D | N | I | E | N | S | Y | T | D | D | N | N | E | L | V | L | N | F | K | E | Y | T | I | S | I | T | 65 |
| CPXV_GRI_B6R   | M | Y  | K  | K  | L  | I  | T  | F | L | V | I | G | A | V | A | S | Y | S | N | N | E | Y | T | P | F | N | K | L | S | V | K | L | Y | I | D | G | V | D | N | I | E | N | S | Y | T | D | D | N | N | E | L | V | L | N | F | K | E | Y | T | I | S | I | T | 64 |
| CPXV_GER91_188 | M | Y  | K  | K  | L  | I  | T  | F | L | V | I | G | A | I | A | S | Y | S | N | N | E | Y | T | P | F | N | K | L | S | V | K | L | Y | I | D | G | V | D | N | I | E | N | S | Y | T | D | D | N | N | E | L | V | L | N | F | K | E | Y | T | I | S | I | T | 64 |
| ECTV_MOS_C3R   | M | Y  | K  | K  | L  | I  | T  | F | L | V | I | G | A | V | A | S | Y | S | N | N | E | Y | T | P | F | N | K | L | S | V | K | L | Y | I | D | G | V | D | N | I | E | N | S | Y | T | D | D | N | N | E | L | V | L | N | F | K | E | Y | T | I | S | I | T | 64 |
| VACV_WR_B7R    | M | Y  | K  | K  | L  | I  | T  | F | L | V | I | G | A | L | A | S | Y | S | N | N | E | Y | T | P | F | N | K | L | S | V | K | L | Y | I | D | G | V | D | N | I | E | N | S | Y | T | D | D | N | N | E | L | V | L | N | F | K | E | Y | T | I | S | I | T | 65 |

  

|                | 70 | 80 | 90 | 100 | 110 | 120 | 130 |   |   |   |   |   |   |   |   |   |   |   |   |   |   |   |   |   |   |   |   |   |   |   |   |   |   |   |   |   |   |   |   |   |   |   |   |   |   |   |   |   |   |   |   |   |   |   |   |   |   |   |   |   |   |   |   |   |     |
|----------------|----|----|----|-----|-----|-----|-----|---|---|---|---|---|---|---|---|---|---|---|---|---|---|---|---|---|---|---|---|---|---|---|---|---|---|---|---|---|---|---|---|---|---|---|---|---|---|---|---|---|---|---|---|---|---|---|---|---|---|---|---|---|---|---|---|---|-----|
| MPXV-SL-161    | E  | S  | C  | D   | V   | G   | F   | D | S | I | D | I | D | V | I | N | D | Y | K | I | L | M | Y | T | I | D | S | S | T | I | Q | R | R | G | H | T | C | R | I | S | T | K | L | S | C | H | Y | D | K | H | P | Y | I | H | K | Y | E | G | D | E | R | O | Y | S | 130 |
| MPXV_Z96_B8R   | E  | S  | C  | D   | V   | G   | F   | D | S | I | D | I | D | V | I | N | D | Y | K | I | L | M | Y | T | I | D | S | S | T | I | Q | R | R | G | H | T | C | R | I | S | T | K | L | S | C | H | Y | D | K | H | P | Y | I | H | K | Y | E | G | D | E | R | O | Y | S | 130 |
| TATV_DAH68_190 | E  | S  | C  | D   | V   | G   | F   | D | S | I | D | I | D | V |   |   |   |   |   |   |   |   |   |   |   |   |   |   |   |   |   |   |   |   |   |   |   |   |   |   |   |   |   |   |   |   |   |   |   |   |   |   |   |   |   |   |   |   |   |   |   |   |   |   |     |

**Figure S7.** Sequence alignment of the SCP-3 family members. Cysteine residues are boxed in yellow.
