# Supplementary material for: Structural Conservation and Functional Diversity of the Poxvirus Immune Evasion (PIE) Domain Superfamily
Source: MDPI journal article supplement (doi:10.3390/v7092848), 2015-08-28
Supplement: s1 [file s1]

|                       | 1        | 10          | 20  | 30         | 40          | 50      | 60        |         |    |
|-----------------------|----------|-------------|-----|------------|-------------|---------|-----------|---------|----|
| <i>CMLV_M96_18</i>    | MSSIRFIA | GLYLISVFGN  | CHE | DPYYQPFDKL | NLDIYTYEDLV | PYTVNDL | PNPNDDTTS | SVFK    | 64 |
| <i>HSPV9_023</i>      | MSSIRFIA | GLGLIFVLVGN | CHD | DPYYQPFNKL | NLDIYTYEDLV | PYTVDN  | .....     | DTTSFVK | 57 |
| <i>CPXV_GRI_C12L</i>  | MSSIRFIA | GLGLISVLVGN | CHD | DPYYQPFDKL | NLDIYTYEDLV | PYTVNDL | LPNPNDTTS | SVFK    | 64 |
| <i>CPXV_BRI_028</i>   | MTAIRFIA | GLGLISVFGN  | CRV | DPYYQPFDKL | NLDIYTYEDLV | PYTVNDL | LPNPNDTTS | SVFK    | 65 |
| <i>CPXV_GER91_026</i> | MSSIRFIA | GLYLISVIFGN | CHD | DPYYQPFDKL | NLDIYTYEDLV | PYTVNDL | PNPNDDTTS | SVFK    | 64 |
| <i>VACV_WR_C8L</i>    | MSSIRFIA | GLYLISVIFGN | CHE | DPYYQPFNKL | NLDIYTYEDLV | PYTVDN  | .....     | DTTSFVK | 57 |

  

|                       | 70             | 80          | 90      | 100       | 110     | 120      |          |     |
|-----------------------|----------------|-------------|---------|-----------|---------|----------|----------|-----|
| <i>CMLV_M96_18</i>    | IYFKNFWITVMTKW | CASFIDTVSLY | ISHDNLN | IOFYTRDEY | DTQSEDK | GTIDVKAR | CNHLTKRE | 129 |
| <i>HSPV9_023</i>      | IYFKNFWITVMTKW | CAPFIDTVSVY | TSHDNLN | IEFYTRDEY | DTQSEDK | GTIDVKAR | CNHLTKRE | 122 |
| <i>CPXV_GRI_C12L</i>  | IYFKNFWITVMTKW | CAPFIDTVSVY | TSHDNLN | IOFYTRDEY | DTQSEDK | GTIDVKAR | CNHLTKRE | 129 |
| <i>CPXV_BRI_028</i>   | IYFKNFWITVMTKW | CAPFIDTVSVY | TSHDNLN | IOFYTRDEY | DTQSEDK | GTIDVKAR | CNHLTKRE | 130 |
| <i>CPXV_GER91_026</i> | IYFKNFWITVMTKW | CAPFIDTVSVY | TSHDNLN | IEFYTRDEY | DTQSEDK | GTIDVKAR | CNHLTKRE | 130 |
| <i>VACV_WR_C8L</i>    | IYFKNFWITVMTKW | CAPFIDTVSVY | TSHDNLN | IEFYTRDEY | DTQSEDK | GTIDVKAR | CNHLTKRE | 122 |

  

|                       | 130          | 140     | 150          | 160           | 170    | 180       |     |
|-----------------------|--------------|---------|--------------|---------------|--------|-----------|-----|
| <i>CMLV_M96_18</i>    | VIVTQKEAYRYS | LSDDLSC | FDSDLDLEIDL  | IE NSTDTTVLKS | YELMLP | KRAKTSIHN | 182 |
| <i>HSPV9_023</i>      | VIVTQKEAYRYS | LSDDLSC | FDSDLDLEIDL  | IE NSTDTTVLKS | YELMLP | KRAKTSIHN | 177 |
| <i>CPXV_GRI_C12L</i>  | VIVTQKEAYRYS | LSDDLSC | CFDSDLDLEIDL | IE NSTDTTVLKS | YELMLP | KRAKTSIHN | 182 |
| <i>CPXV_BRI_028</i>   | VIVTQKEAYRYS | LSDDLSC | CFDSDLDLEIDL | IE NSTDTTVLKS | YELMLP | KRAKTSIHN | 185 |
| <i>CPXV_GER91_026</i> | VIVTQKEAYRYS | LSDDLSC | CFDSDLDLEIDL | IE NSTDTTVLKS | YELMLP | KRAKTSIHN | 184 |
| <i>VACV_WR_C8L</i>    | VIVTQKEAYRYS | LSDDLSC | CFDSDLDLEIDL | IE NSTDTTVLKS | YELMLP | KRAKTSIHN | 177 |

**Figure S11.** Sequence alignment of the C8 family members. Cysteine residues are boxed in yellow. Predicted N-linked glycosylation sites are boxed in blue.
