# Supplementary material for: Structural Conservation and Functional Diversity of the Poxvirus Immune Evasion (PIE) Domain Superfamily
Source: MDPI journal article supplement (doi:10.3390/v7092848), 2015-08-28
Supplement: s1 [file s1]

# CrmB Family Alignment

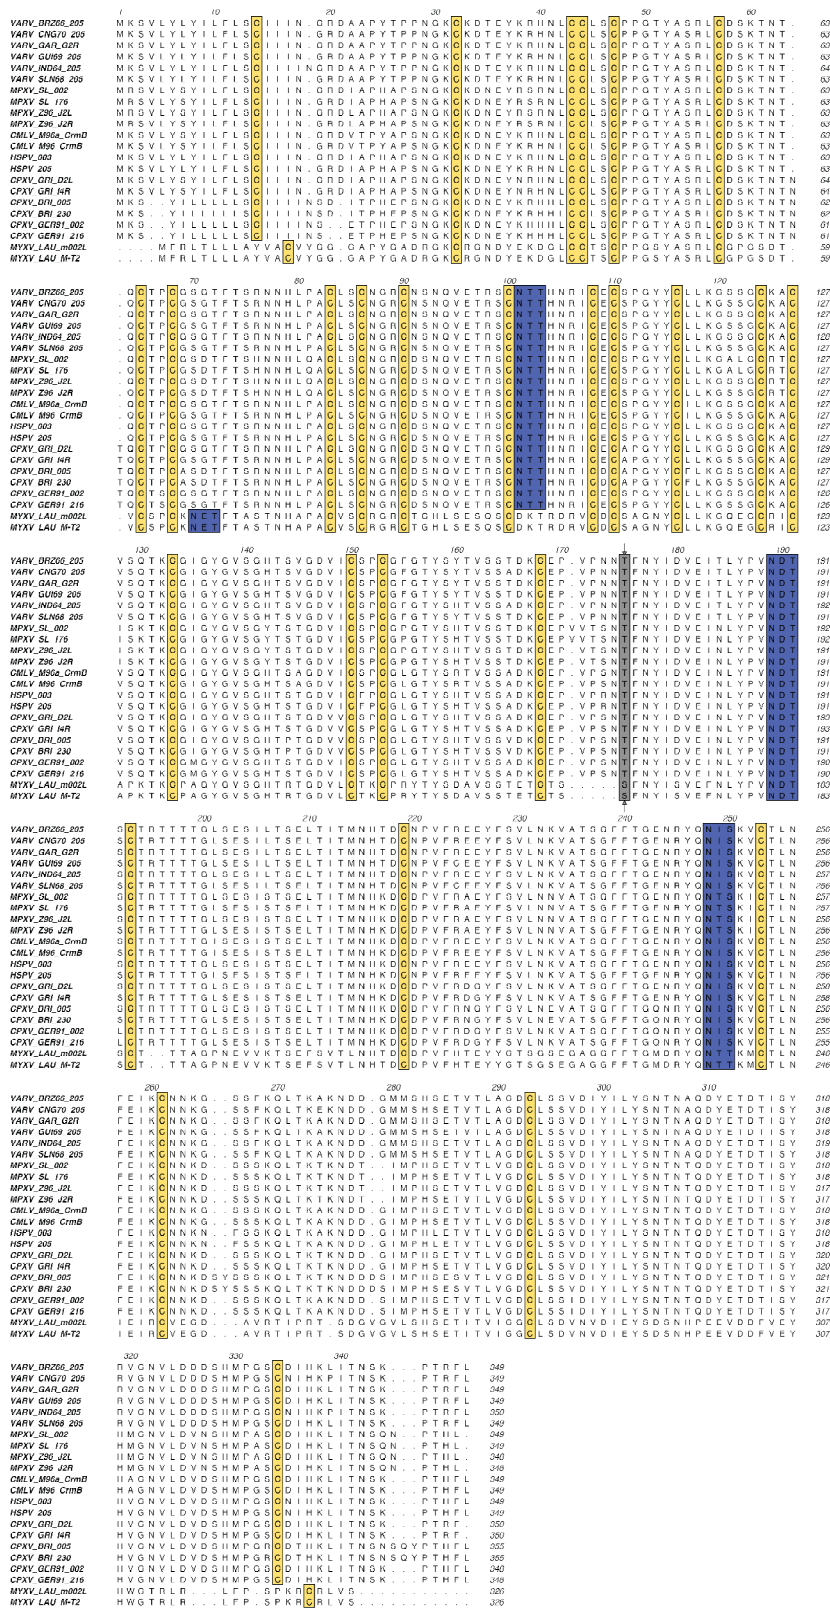

**Figure S3.** Sequence alignment of the CrmB family members. Cysteine residues are boxed in yellow. Predicted N-linked glycosylation sites are boxed in blue.
