# Supplementary material for: Structural Conservation and Functional Diversity of the Poxvirus Immune Evasion (PIE) Domain Superfamily
Source: MDPI journal article supplement (doi:10.3390/v7092848), 2015-08-28
Supplement: s1 [file s1]

| Protein             | Sequence                                                                                              | Position |
|---------------------|-------------------------------------------------------------------------------------------------------|----------|
| M2-like_YKV175      | M F K L C N Y F V L L Y V L I H S I S C . . . . . A C I . . . H D K W V L E                           | 30       |
| M2-like_YMTV_YLD_9L | M E G V K K L F N F L I L F F F V S T T L S Y I . . . . . L K Q D H K D F G K C V S K K Y R Y W N L A | 46       |
| M2-like_DPXV_W83_17 | M A K L F Y F I L I S I C I S S C L S . . . S P L S N R N G K L S S S L G K C N S H R Y R F W N L A   | 47       |
| M2-like_YKV175      | A I L T I T V N Y P I T E T Q S D E C V Y V L E K N I D S S I N I T G Y G L N I Y M S E N T P D D R   | 80       |
| M2-like_YMTV_YLD_9L | A V L T L G L T Y T I P E K E . . Q C F A H I H L . . D T T L V I G . Y G L S I E I E I T N K I D G   | 91       |
| M2-like_DPXV_W83_17 | S S L V I G L T Y P I K E Q E . . E C K I D I I S . . N S H I S I T G Y G I N V D F E F T T E I T K   | 93       |
| M2-like_YKV175      | K I A S A A V S V Y N D . T I K L R I Y S S Y S D D N I I E N R N N N A N Y T I Q I T C L N N E C N   | 129      |
| M2-like_YMTV_YLD_9L | Q V V S V V E G L Y N N N T I I L L L F I A N . D R S D Y E N . S V I P N T K I S V T C C T D I D C D | 139      |
| M2-like_DPXV_W83_17 | P L V A S A E G F V N N . T L V I L I F M A D . D R S S N A N . N S I P D T K V T I T C L D V D C D   | 140      |
| M2-like_YKV175      | N N K D K D T E S D K I D S Y I N T V I D M G S C V T C L H V E L R P G T D N F S P R V A T V S S F   | 179      |
| M2-like_YMTV_YLD_9L | N N P T R Q V L N G K V S K . . N E L I I F G S C L T C V L L D T Y P N S I K G F L P S S G I V A K   | 187      |
| M2-like_DPXV_W83_17 | I V S K R Q N I D N L S T K . . N E L I I V G S C V T C V D L N V Y P N S L Y G F L K S A N S I I A R | 188      |
| M2-like_YKV175      | T Y R N E I E N T N A K F L T I G N V G D D L N F E E N C K N I K E N I P V Y L C Y K Q . .           | 223      |
| M2-like_YMTV_YLD_9L | P Y S K G V N E D N G Y L W Y R H K K D . . . . . S C N V D F L N T S Y S I C S K I R R               | 226      |
| M2-like_DPXV_W83_17 | P Y S G T S G . . . G Y T W R N L N T S K . . . . . R Q C D V D T E K I D Y Y V C D K K S N           | 226      |

**Figure S10.** Sequence alignment of the M2-like family members. Cysteine residues are boxed in yellow. Predicted N-linked glycosylation sites are boxed in blue.
